# Supplementary material
Source: publisher figshare collection journal article supplement (https://acs.figshare.com/ndownloader/files/3824857)
Supplement: Supplementary file 1 [file 3824857]

 
data_shelx
 
_audit_creation_method            SHELXL-2013
_chemical_name_systematic
;
 [Me2NH2][Me4N]2[Zn4(5-HIPA)2(H-5-HIPA)2.5].3DMF
;
_chemical_name_common             'Compound 3'
_chemical_melting_point           n/a
_chemical_formula_moiety          
 'C46 H45.50 N3 O22.50 Zn4'
_chemical_formula_sum
 'C46 H45.50 N3 O22.50 Zn4' 
_chemical_formula_weight          1261.83

loop_
 _atom_type_symbol
 _atom_type_description
 _atom_type_scat_dispersion_real
 _atom_type_scat_dispersion_imag
 _atom_type_scat_source
 'C'  'C'   0.0033   0.0016
 'International Tables Vol C Tables 4.2.6.8 and 6.1.1.4'
 'N'  'N'   0.0061   0.0033
 'International Tables Vol C Tables 4.2.6.8 and 6.1.1.4'
 'O'  'O'   0.0106   0.0060
 'International Tables Vol C Tables 4.2.6.8 and 6.1.1.4'
 'Zn'  'Zn'   0.2839   1.4301
 'International Tables Vol C Tables 4.2.6.8 and 6.1.1.4'
 'H'  'H'   0.0000   0.0000
 'International Tables Vol C Tables 4.2.6.8 and 6.1.1.4'
 
_space_group_crystal_system       orthorhombic
_space_group_IT_number            36
_space_group_name_H-M_alt         'C m c 21'
_space_group_name_Hall            'C 2c -2'
_symmetry_space_group_name_H-M    'C m c 21'
 
_shelx_space_group_comment
;
The symmetry employed for this shelxl refinement is uniquely defined
by the following loop, which should always be used as a source of
symmetry information in preference to the above space-group names.
They are only intended as comments.
;
 
loop_
 _space_group_symop_operation_xyz
 'x, y, z'
 '-x, -y, z+1/2'
 '-x, y, z'
 'x, -y, z+1/2'
 'x+1/2, y+1/2, z'
 '-x+1/2, -y+1/2, z+1/2'
 '-x+1/2, y+1/2, z'
 'x+1/2, -y+1/2, z+1/2'
 
_cell_length_a                    54.076(4)
_cell_length_b                    15.3088(6)
_cell_length_c                    16.0309(6)
_cell_angle_alpha                 90
_cell_angle_beta                  90
_cell_angle_gamma                 90
_cell_volume                      13271.0(12)
_cell_formula_units_Z             8
_cell_measurement_temperature     100
_cell_measurement_reflns_used     35150
_cell_measurement_theta_min       3.0
_cell_measurement_theta_max       27.6 
 
_exptl_crystal_description        'Block'
_exptl_crystal_colour             'Colorless' 
_exptl_crystal_density_meas       ? 
_exptl_crystal_density_method     ?              
_exptl_crystal_density_diffrn     1.263          
_exptl_crystal_F_000              5140
_exptl_transmission_factor_min    ?                                             
_exptl_transmission_factor_max    ?                                             
_exptl_crystal_size_max           ? 
_exptl_crystal_size_mid           ? 
_exptl_crystal_size_min           ? 
_exptl_absorpt_coefficient_mu     1.494
_shelx_estimated_absorpt_T_min    ? 
_shelx_estimated_absorpt_T_max    ? 
_exptl_absorpt_correction_type    'Multi-scan'
_exptl_absorpt_correction_T_max   1.000
_exptl_absorpt_correction_T_min   0.370
_exptl_absorpt_process_details    'CrystalClear 3.1 (Rigaku 2012)'  
 
_exptl_special_details
;
 ?
;
 
_diffrn_ambient_temperature       100
_diffrn_radiation_wavelength      0.71073
_diffrn_radiation_type            MoK\a
_diffrn_source                    'Rotating anode'                       
_diffrn_measurement_device_type   
;
Rigaku Saturn724+ (2x2 bin mode)
;
_diffrn_measurement_method        'profile data from \w-scans' 
_diffrn_detector_area_resol_mean  28.5714
_diffrn_reflns_number             60948
_diffrn_reflns_av_unetI/netI      0.2756
_diffrn_reflns_av_R_equivalents   0.2261
_diffrn_reflns_limit_h_min        -70
_diffrn_reflns_limit_h_max        64
_diffrn_reflns_limit_k_min        -19
_diffrn_reflns_limit_k_max        19
_diffrn_reflns_limit_l_min        -20
_diffrn_reflns_limit_l_max        20
_diffrn_reflns_theta_min          3.014
_diffrn_reflns_theta_max          27.485
_diffrn_reflns_theta_full         25.242
_diffrn_measured_fraction_theta_max   0.997
_diffrn_measured_fraction_theta_full  0.997
_diffrn_reflns_Laue_measured_fraction_max    0.997
_diffrn_reflns_Laue_measured_fraction_full   0.997
_diffrn_reflns_point_group_measured_fraction_max   0.998
_diffrn_reflns_point_group_measured_fraction_full  0.997
_reflns_number_total              15288
_reflns_number_gt                 7003
_reflns_threshold_expression      'I > 2\s(I)'
_reflns_Friedel_coverage          0.930
_reflns_Friedel_fraction_max      0.998
_reflns_Friedel_fraction_full     0.998
 
_reflns_special_details
;
 Reflections were merged by SHELXL according to the crystal
 class for the calculation of statistics and refinement.
 
 Structure factors included contributions from the .fab file.
 
 _reflns_Friedel_fraction is defined as the number of unique
 Friedel pairs measured divided by the number that would be
 possible theoretically, ignoring centric projections and
 systematic absences.
;
 
_computing_data_collection
;
CrystalClear-SM Expert 3.1 b27 (Rigaku, 20112)
;
_computing_cell_refinement
;
CrystalClear-SM Expert 3.1 b27 (Rigaku, 20112)
;
_computing_data_reduction
;
CrystalClear-SM Expert 3.1 b27 (Rigaku, 20112)
;
_computing_structure_solution     'SHELXs-2013 (Sheldrick, 2013)'
_computing_structure_refinement   'SHELXL-2013 (Sheldrick, 2013)'
_computing_molecular_graphics     'DIAMOND 3.2g (Crystal Impact)'
_computing_publication_material   ?
 
_refine_special_details
;
 Refined as a 2-component inversion twin.
;
_refine_ls_structure_factor_coef  Fsqd
_refine_ls_matrix_type            full
_refine_ls_weighting_scheme       calc
_refine_ls_weighting_details
'w=1/[\s^2^(Fo^2^)+(0.0901P)^2^] where P=(Fo^2^+2Fc^2^)/3'
_atom_sites_solution_primary      ?
_atom_sites_solution_secondary    ?
_atom_sites_solution_hydrogens    geom
_refine_ls_hydrogen_treatment     constr
_refine_ls_extinction_method      none
_refine_ls_extinction_coef        .
_refine_ls_abs_structure_details
;
 Refined as an inversion twin.
;
_refine_ls_abs_structure_Flack    0.06(3)
_chemical_absolute_configuration  ?
_refine_ls_number_reflns          15288
_refine_ls_number_parameters      589
_refine_ls_number_restraints      3
_refine_ls_R_factor_all           0.2127
_refine_ls_R_factor_gt            0.1060
_refine_ls_wR_factor_ref          0.2257
_refine_ls_wR_factor_gt           0.1868
_refine_ls_goodness_of_fit_ref    0.969
_refine_ls_restrained_S_all       0.969
_refine_ls_shift/su_max           0.001
_refine_ls_shift/su_mean          0.000
 
loop_
 _atom_site_label
 _atom_site_type_symbol
 _atom_site_fract_x
 _atom_site_fract_y
 _atom_site_fract_z
 _atom_site_U_iso_or_equiv
 _atom_site_adp_type
 _atom_site_occupancy
 _atom_site_site_symmetry_order  
 _atom_site_calc_flag
 _atom_site_refinement_flags_posn
 _atom_site_refinement_flags_adp
 _atom_site_refinement_flags_occupancy
 _atom_site_disorder_assembly
 _atom_site_disorder_group
Zn3 Zn 0.25296(3) 0.93899(9) 0.54909(10) 0.0232(4) Uani 1 1 d . . . . .
Zn4 Zn 0.20057(3) 0.94878(9) 0.65008(10) 0.0259(4) Uani 1 1 d . . . . .
Zn2 Zn 0.09555(4) 0.67407(12) 0.29350(16) 0.0503(6) Uani 1 1 d . . . . .
Zn1 Zn 0.07028(4) 0.84885(13) 0.33811(15) 0.0554(6) Uani 1 1 d . . . . .
O31 O 0.1009(2) 0.7787(7) 0.3619(7) 0.047(3) Uani 1 1 d . . . . .
O34 O 0.1643(3) 0.9185(7) 0.1618(7) 0.064(4) Uani 1 1 d . . . . .
O35 O 0.1841(2) 1.0066(6) 0.2464(6) 0.032(3) Uani 1 1 d . . . . .
O32 O 0.1590(3) 0.8512(8) 0.5970(8) 0.091(6) Uani 1 1 d . . . . .
O33 O 0.18693(19) 0.9333(7) 0.5390(6) 0.037(3) Uani 1 1 d . . . . .
O51 O 0.22972(19) 1.0178(5) 0.6154(6) 0.028(3) Uani 1 1 d . . . . .
O54 O 0.2433(2) 1.0439(5) 0.9297(5) 0.028(3) Uani 1 1 d . . . . .
O55 O 0.2723(2) 1.1450(6) 0.9386(6) 0.046(3) Uani 1 1 d . . . . .
O23 O 0.0721(3) 0.8552(8) 0.2173(9) 0.072(4) Uani 1 1 d . . . . .
O24 O 0.0753(4) 1.0338(10) -0.1348(14) 0.137(8) Uani 1 1 d . . . . .
O44 O 0.1349(3) 0.6506(9) 0.2460(9) 0.079(5) Uani 1 1 d . . . . .
O22 O 0.0829(3) 0.7181(7) 0.1827(8) 0.067(4) Uani 1 1 d . . . . .
O12 O 0.0651(2) 0.6339(7) 0.3503(9) 0.055(3) Uani 1 1 d . . . . .
O13 O 0.0449(2) 0.7631(7) 0.3643(8) 0.052(3) Uani 1 1 d . . . . .
O42 O 0.1072(3) 0.5512(8) 0.2722(10) 0.077(5) Uani 1 1 d . . . . .
O45 O 0.2140(2) 0.4462(7) 0.0369(7) 0.038(3) Uani 1 1 d . . . . .
O46 O 0.21648(19) 0.5609(6) 0.1183(6) 0.031(3) Uani 1 1 d . . . . .
O53 O 0.2849(2) 1.3421(6) 0.7001(6) 0.032(3) Uani 1 1 d . . . . .
O52 O 0.2620(2) 1.3228(6) 0.5845(6) 0.032(3) Uani 1 1 d . . . . .
O41 O 0.1480(3) 0.2678(8) 0.2047(10) 0.087(5) Uani 1 1 d . . . . .
O25 O 0.0718(4) 1.0774(10) -0.0095(12) 0.100(6) Uani 1 1 d . . . . .
C31 C 0.1234(3) 0.8233(9) 0.3681(11) 0.037(4) Uani 1 1 d . . . . .
C33 C 0.1344(3) 0.8571(9) 0.2986(10) 0.027(4) Uani 1 1 d . . . . .
H33 H 0.1273 0.8481 0.2465 0.033 Uiso 1 1 calc R U . . .
C32 C 0.1331(3) 0.8320(10) 0.4452(12) 0.040(4) Uani 1 1 d . . . . .
H32 H 0.1251 0.8088 0.4916 0.048 Uiso 1 1 calc R U . . .
C35 C 0.1562(3) 0.9053(8) 0.3053(9) 0.023(3) Uani 1 1 d . . . . .
C34 C 0.1556(3) 0.8773(9) 0.4535(9) 0.030(4) Uani 1 1 d . . . . .
C36 C 0.1662(3) 0.9144(9) 0.3862(10) 0.033(4) Uani 1 1 d . . . . .
H36 H 0.1806 0.9470 0.3933 0.040 Uiso 1 1 calc R U . . .
C38 C 0.1682(3) 0.9435(10) 0.2302(10) 0.034(4) Uani 1 1 d . . . . .
C37 C 0.1683(3) 0.8862(9) 0.5356(10) 0.031(4) Uani 1 1 d . . . . .
C51 C 0.2401(3) 1.0781(8) 0.6709(9) 0.025(4) Uiso 1 1 d . . . . .
C52 C 0.2486(2) 1.1555(8) 0.6360(8) 0.019(3) Uiso 1 1 d . . . . .
H52 H 0.2465 1.1675 0.5796 0.022 Uiso 1 1 calc R U . . .
C53 C 0.2423(3) 1.0599(8) 0.7516(8) 0.018(3) Uiso 1 1 d . . . . .
H53 H 0.2352 1.0088 0.7722 0.022 Uiso 1 1 calc R U . . .
C54 C 0.2600(3) 1.2128(9) 0.6874(9) 0.029(4) Uiso 1 1 d . . . . .
C55 C 0.2547(3) 1.1148(8) 0.8059(8) 0.019(3) Uiso 1 1 d . . . . .
C56 C 0.2652(3) 1.1942(8) 0.7723(9) 0.026(4) Uiso 1 1 d . . . . .
H56 H 0.2748 1.2314 0.8048 0.031 Uiso 1 1 calc R U . . .
C58 C 0.2571(3) 1.1011(10) 0.8957(10) 0.034(4) Uiso 1 1 d . . . . .
C48 C 0.2060(3) 0.4897(12) 0.0937(11) 0.040(4) Uani 1 1 d . . . . .
C45 C 0.1828(3) 0.4678(9) 0.1382(11) 0.040(4) Uani 1 1 d . . . . .
C15 C 0.0461(3) 0.6831(12) 0.3623(10) 0.039(4) Uani 1 1 d . . . . .
C57 C 0.2701(3) 1.3013(9) 0.6530(10) 0.031(4) Uiso 1 1 d . . . . .
C43 C 0.1757(3) 0.3775(9) 0.1448(12) 0.047(5) Uani 1 1 d . . . . .
H43 H 0.1854 0.3351 0.1193 0.056 Uiso 1 1 calc R U . . .
C27 C 0.0783(4) 0.7956(13) 0.1635(14) 0.067(6) Uani 1 1 d . . . . .
C46 C 0.1675(3) 0.5287(9) 0.1710(9) 0.032(4) Uani 1 1 d . . . . .
H46 H 0.1717 0.5874 0.1660 0.039 Uiso 1 1 calc R U . . .
C41 C 0.1549(4) 0.3525(12) 0.1879(12) 0.061(6) Uani 1 1 d . . . . .
C47 C 0.1271(4) 0.5734(12) 0.2443(13) 0.057(6) Uani 1 1 d . . . . .
C44 C 0.1458(3) 0.5061(10) 0.2120(10) 0.043(5) Uani 1 1 d . . . . .
C42 C 0.1383(4) 0.4187(12) 0.2180(12) 0.060(6) Uani 1 1 d . . . . .
H42 H 0.1230 0.4040 0.2408 0.072 Uiso 1 1 calc R U . . .
C24 C 0.0827(6) 0.8200(14) 0.0762(14) 0.100(10) Uani 1 1 d . . . . .
C26 C 0.0760(5) 0.9042(13) 0.0495(16) 0.085(8) Uani 1 1 d . . . . .
H26 H 0.0685 0.9425 0.0867 0.102 Uiso 1 1 calc R U . . .
C22 C 0.0908(5) 0.7615(13) 0.0185(18) 0.096(9) Uani 1 1 d . . . . .
H22 H 0.0960 0.7065 0.0359 0.115 Uiso 1 1 calc R U . . .
C28 C 0.0750(5) 1.0232(17) -0.0574(15) 0.069(7) Uani 1 1 d . . . . .
C21 C 0.0917(6) 0.7821(19) -0.065(2) 0.119(11) Uani 1 1 d . . . . .
C25 C 0.0805(8) 0.9297(18) -0.029(2) 0.143(15) Uani 1 1 d . . . . .
N71 N 0.2055(3) 0.6776(8) 0.3554(8) 0.037(3) Uani 1 1 d . . . . .
C74 C 0.2238(4) 0.6098(12) 0.3348(12) 0.063(6) Uiso 1 1 d . . . . .
H74A H 0.2270 0.5748 0.3833 0.094 Uiso 1 1 calc R U . . .
H74B H 0.2388 0.6369 0.3165 0.094 Uiso 1 1 calc R U . . .
H74C H 0.2174 0.5734 0.2910 0.094 Uiso 1 1 calc R U . . .
C73 C 0.2140(4) 0.7342(12) 0.4256(12) 0.062(6) Uiso 1 1 d . . . . .
H73A H 0.2171 0.6988 0.4739 0.093 Uiso 1 1 calc R U . . .
H73B H 0.2015 0.7765 0.4383 0.093 Uiso 1 1 calc R U . . .
H73C H 0.2290 0.7638 0.4098 0.093 Uiso 1 1 calc R U . . .
C75 C 0.2006(3) 0.7282(11) 0.2823(11) 0.051(5) Uiso 1 1 d . . . . .
H75A H 0.1885 0.7719 0.2949 0.077 Uiso 1 1 calc R U . . .
H75B H 0.1945 0.6907 0.2390 0.077 Uiso 1 1 calc R U . . .
H75C H 0.2156 0.7558 0.2639 0.077 Uiso 1 1 calc R U . . .
C72 C 0.1822(6) 0.6331(19) 0.3855(18) 0.131(11) Uiso 1 1 d . . . . .
H72A H 0.1859 0.5988 0.4341 0.197 Uiso 1 1 calc R U . . .
H72B H 0.1759 0.5958 0.3423 0.197 Uiso 1 1 calc R U . . .
H72C H 0.1701 0.6764 0.3993 0.197 Uiso 1 1 calc R U . . .
N81 N 0.1794(4) 0.8075(11) 0.9602(11) 0.075(6) Uani 1 1 d . . . . .
C83 C 0.1820(5) 0.7593(14) 1.0411(14) 0.095(8) Uiso 1 1 d . . . . .
H83A H 0.1833 0.6978 1.0303 0.142 Uiso 1 1 calc R U . . .
H83B H 0.1678 0.7703 1.0754 0.142 Uiso 1 1 calc R U . . .
H83C H 0.1966 0.7789 1.0695 0.142 Uiso 1 1 calc R U . . .
C82 C 0.1585(4) 0.8708(12) 0.9637(12) 0.060(6) Uiso 1 1 d . . . . .
H82A H 0.1457 0.8528 0.9257 0.090 Uiso 1 1 calc R U . . .
H82B H 0.1643 0.9279 0.9484 0.090 Uiso 1 1 calc R U . . .
H82C H 0.1519 0.8726 1.0193 0.090 Uiso 1 1 calc R U . . .
C84 C 0.2028(5) 0.8627(16) 0.9406(17) 0.106(9) Uiso 1 1 d . . . . .
H84A H 0.2119 0.8353 0.8964 0.158 Uiso 1 1 calc R U . . .
H84B H 0.2129 0.8665 0.9895 0.158 Uiso 1 1 calc R U . . .
H84C H 0.1979 0.9203 0.9235 0.158 Uiso 1 1 calc R U . . .
C85 C 0.1738(5) 0.7433(15) 0.8881(15) 0.092(8) Uiso 1 1 d . . . . .
H85A H 0.1889 0.7175 0.8690 0.137 Uiso 1 1 calc R U . . .
H85B H 0.1661 0.7743 0.8430 0.137 Uiso 1 1 calc R U . . .
H85C H 0.1629 0.6983 0.9075 0.137 Uiso 1 1 calc R U . . .
O21 O 0.1017(7) 0.7263(18) -0.1280(17) 0.240(15) Uani 1 1 d . . . . .
C923 C 0.0898(8) 0.8704(19) -0.086(2) 0.157(16) Uani 1 1 d . . . . .
H923 H 0.0948 0.8895 -0.1384 0.188 Uiso 1 1 calc R U . . .
C63 C 0.1092(7) 0.951(2) 0.685(2) 0.166(16) Uiso 1 1 d . . . . .
H63A H 0.1214 0.9831 0.6543 0.248 Uiso 1 1 calc R U . . .
H63B H 0.1157 0.9368 0.7394 0.248 Uiso 1 1 calc R U . . .
H63C H 0.0947 0.9867 0.6917 0.248 Uiso 1 1 calc R U . . .
N61 N 0.1047(14) 0.894(5) 0.653(4) 0.36(4) Uiso 1 1 d . . . . .
H61A H 0.1200 0.8620 0.6466 0.437 Uiso 1 1 calc R U . . .
H61B H 0.0995 0.9119 0.5980 0.437 Uiso 1 1 calc R U . . .
C62 C 0.0869(13) 0.833(4) 0.682(5) 0.37(4) Uiso 1 1 d . . . . .
H62A H 0.0775 0.8123 0.6349 0.548 Uiso 1 1 calc R U . . .
H62B H 0.0760 0.8612 0.7207 0.548 Uiso 1 1 calc R U . . .
H62C H 0.0951 0.7853 0.7082 0.548 Uiso 1 1 calc R U . . .
O11A O 0.0000 0.409(3) 0.386(3) 0.105(17) Uiso 0.5 2 d S . P A 1
C11A C 0.0000 0.498(5) 0.383(3) 0.07(2) Uiso 0.5 2 d S . P A 1
C12A C 0.0195(16) 0.546(5) 0.374(4) 0.13(3) Uiso 0.5 1 d . . P A 1
H12A H 0.0337 0.5180 0.3561 0.160 Uiso 0.5 1 calc R U P A 1
C13A C 0.0217(11) 0.639(4) 0.388(4) 0.037(18) Uiso 0.5 1 d . . P A 1
C14A C 0.0000 0.676(5) 0.369(4) 0.008(18) Uiso 0.5 2 d S . P A 1
H14A H 0.0000 0.7299 0.3416 0.009 Uiso 0.5 2 calc R U P A 1
C11B C 0.0000 0.508(6) 0.419(6) 0.10(3) Uiso 0.5 2 d S . P A 2
O11B O 0.0000 0.416(2) 0.436(2) 0.049(10) Uiso 0.5 2 d S . P A 2
C12B C 0.0227(8) 0.545(2) 0.404(2) 0.033(9) Uiso 0.5 1 d . . P A 2
H12B H 0.0377 0.5164 0.4131 0.039 Uiso 0.5 1 calc R U P A 2
C13B C 0.0204(13) 0.633(4) 0.371(3) 0.05(2) Uiso 0.5 1 d . . P A 2
C14B C 0.0000 0.676(7) 0.382(5) 0.05(4) Uiso 0.5 2 d S . P A 2
H14B H 0.0000 0.7348 0.3968 0.060 Uiso 0.5 2 calc R U P A 2
 
loop_
 _atom_site_aniso_label
 _atom_site_aniso_U_11
 _atom_site_aniso_U_22
 _atom_site_aniso_U_33
 _atom_site_aniso_U_23
 _atom_site_aniso_U_13
 _atom_site_aniso_U_12
Zn3 0.0340(12) 0.0170(7) 0.0188(8) 0.0020(8) 0.0018(9) 0.0004(7)
Zn4 0.0320(11) 0.0175(7) 0.0282(9) -0.0001(8) 0.0018(9) 0.0019(8)
Zn2 0.0302(13) 0.0358(11) 0.0849(16) -0.0079(11) 0.0147(12) -0.0054(9)
Zn1 0.0388(15) 0.0473(12) 0.0800(16) -0.0067(12) 0.0059(13) -0.0078(11)
O31 0.026(8) 0.037(6) 0.079(9) 0.006(6) 0.003(6) -0.004(5)
O34 0.106(12) 0.062(8) 0.023(7) 0.000(6) 0.019(7) -0.038(8)
O35 0.042(8) 0.035(6) 0.019(5) 0.007(5) 0.004(5) -0.014(6)
O32 0.172(18) 0.055(9) 0.047(9) 0.015(7) -0.014(10) -0.045(10)
O33 0.021(7) 0.062(7) 0.028(6) -0.007(6) -0.006(5) 0.000(6)
O51 0.025(7) 0.018(5) 0.041(7) -0.007(4) 0.007(5) -0.001(5)
O54 0.050(8) 0.016(5) 0.017(5) 0.001(4) 0.002(5) -0.001(5)
O55 0.082(10) 0.029(6) 0.028(6) 0.005(5) -0.007(6) -0.016(6)
O23 0.088(12) 0.033(7) 0.094(11) -0.004(8) -0.005(9) 0.013(7)
O24 0.23(3) 0.049(9) 0.134(18) 0.029(11) -0.004(17) -0.013(11)
O44 0.067(12) 0.048(8) 0.123(13) -0.028(8) 0.021(9) 0.008(7)
O22 0.099(12) 0.027(6) 0.074(9) 0.021(6) -0.006(8) -0.006(7)
O12 0.018(7) 0.048(7) 0.100(10) 0.007(7) 0.016(7) 0.001(6)
O13 0.025(8) 0.043(7) 0.087(10) -0.012(6) 0.008(6) -0.007(6)
O42 0.033(9) 0.070(9) 0.129(13) -0.004(9) 0.049(9) 0.013(7)
O45 0.040(8) 0.049(7) 0.025(6) -0.001(6) 0.003(6) 0.019(6)
O46 0.019(6) 0.042(6) 0.032(6) 0.006(5) 0.000(5) 0.007(5)
O53 0.050(8) 0.021(5) 0.024(6) 0.010(4) -0.007(5) -0.011(5)
O52 0.052(8) 0.020(5) 0.023(6) -0.001(4) -0.003(5) 0.009(5)
O41 0.083(13) 0.051(8) 0.127(13) -0.012(8) 0.049(10) -0.019(8)
O25 0.147(19) 0.052(9) 0.101(13) 0.014(9) 0.029(13) 0.008(10)
C31 0.036(12) 0.021(8) 0.054(12) 0.000(8) 0.015(10) 0.003(8)
C33 0.011(9) 0.037(8) 0.033(9) -0.007(8) 0.000(7) -0.003(6)
C32 0.023(11) 0.039(10) 0.059(13) -0.004(9) 0.014(9) 0.006(8)
C35 0.022(9) 0.020(7) 0.027(9) -0.006(6) 0.004(7) 0.010(6)
C34 0.049(13) 0.020(8) 0.021(9) -0.009(7) 0.012(8) 0.003(8)
C36 0.039(12) 0.020(7) 0.042(10) -0.006(7) 0.005(9) 0.008(7)
C38 0.050(12) 0.028(8) 0.024(9) 0.020(8) 0.013(8) 0.011(9)
C37 0.039(12) 0.017(7) 0.037(11) 0.007(8) 0.000(9) -0.002(7)
C48 0.039(12) 0.047(11) 0.033(11) 0.023(9) -0.012(9) -0.014(10)
C45 0.035(11) 0.028(8) 0.057(12) 0.002(8) 0.003(10) 0.004(7)
C15 0.026(11) 0.047(10) 0.045(11) 0.000(9) 0.012(8) -0.006(9)
C43 0.043(12) 0.022(8) 0.075(13) -0.001(9) 0.019(11) 0.006(7)
C27 0.078(17) 0.043(12) 0.080(17) 0.023(13) -0.021(13) -0.019(11)
C46 0.023(10) 0.030(8) 0.044(11) 0.003(7) 0.013(8) 0.003(7)
C41 0.073(17) 0.045(11) 0.066(13) -0.019(10) 0.031(12) -0.016(11)
C47 0.058(16) 0.030(11) 0.083(15) -0.008(10) -0.004(12) 0.019(10)
C44 0.051(13) 0.034(9) 0.043(10) -0.014(8) 0.013(9) 0.004(9)
C42 0.045(14) 0.054(12) 0.082(15) 0.003(11) 0.006(11) -0.012(10)
C24 0.20(3) 0.042(12) 0.061(16) 0.003(12) -0.004(17) -0.007(16)
C26 0.14(3) 0.052(13) 0.059(15) 0.008(13) -0.009(17) 0.003(13)
C22 0.14(3) 0.043(13) 0.10(2) 0.006(14) 0.059(18) -0.020(14)
C28 0.073(18) 0.09(2) 0.047(15) 0.029(14) 0.004(13) 0.004(14)
C21 0.16(3) 0.08(2) 0.11(3) 0.000(19) 0.04(2) -0.013(19)
C25 0.27(5) 0.070(19) 0.09(2) -0.02(2) 0.01(3) 0.00(2)
N71 0.042(10) 0.038(7) 0.031(8) 0.004(6) 0.002(7) 0.000(7)
N81 0.092(16) 0.065(11) 0.068(12) 0.011(10) 0.002(11) 0.024(11)
O21 0.37(5) 0.19(3) 0.16(2) -0.04(2) 0.06(3) 0.05(3)
C923 0.29(5) 0.08(2) 0.11(2) 0.030(19) 0.02(3) -0.02(3)
 
_geom_special_details
;
 All esds (except the esd in the dihedral angle between two l.s. planes)
 are estimated using the full covariance matrix.  The cell esds are taken
 into account individually in the estimation of esds in distances, angles
 and torsion angles; correlations between esds in cell parameters are only
 used when they are defined by crystal symmetry.  An approximate (isotropic)
 treatment of cell esds is used for estimating esds involving l.s. planes.
;
 
loop_
 _geom_bond_atom_site_label_1
 _geom_bond_atom_site_label_2
 _geom_bond_distance
 _geom_bond_site_symmetry_2
 _geom_bond_publ_flag
Zn3 O46 1.991(10) 6_565 ?
Zn3 O54 2.002(9) 4_574 ?
Zn3 O52 2.035(9) 7_545 ?
Zn3 O51 2.041(9) . ?
Zn3 O55 2.425(10) 4_574 ?
Zn3 C58 2.544(16) 4_574 ?
Zn3 C48 2.574(17) 6_565 ?
Zn4 O35 1.910(9) 4_575 ?
Zn4 O33 1.942(10) . ?
Zn4 O51 1.977(10) . ?
Zn4 O53 1.981(9) 7_545 ?
Zn2 O31 1.963(11) . ?
Zn2 O12 1.978(11) . ?
Zn2 O42 2.013(12) . ?
Zn2 O22 2.019(13) . ?
Zn2 O44 2.289(14) . ?
Zn2 C47 2.432(19) . ?
Zn2 Zn1 3.089(3) . ?
Zn1 O24 1.867(15) 4_575 ?
Zn1 O23 1.941(15) . ?
Zn1 O13 1.946(11) . ?
Zn1 O31 2.008(11) . ?
Zn1 C28 2.59(2) 4_575 ?
O31 C31 1.402(19) . ?
O34 C38 1.180(18) . ?
O35 C38 1.317(19) . ?
O35 Zn4 1.911(9) 4_574 ?
O32 C37 1.228(18) . ?
O33 C37 1.242(17) . ?
O51 C51 1.400(16) . ?
O54 C58 1.272(18) . ?
O54 Zn3 2.002(9) 4_575 ?
O55 C58 1.265(18) . ?
O55 Zn3 2.425(10) 4_575 ?
O23 C27 1.30(2) . ?
O24 C28 1.25(2) . ?
O24 Zn1 1.867(15) 4_574 ?
O44 C47 1.26(2) . ?
O22 C27 1.25(2) . ?
O12 C15 1.291(19) . ?
O13 C15 1.227(18) . ?
O42 C47 1.21(2) . ?
O45 C48 1.21(2) . ?
O46 C48 1.291(19) . ?
O46 Zn3 1.991(10) 6_564 ?
O53 C57 1.267(17) . ?
O53 Zn4 1.981(9) 7 ?
O52 C57 1.226(18) . ?
O52 Zn3 2.035(9) 7 ?
O41 C41 1.37(2) . ?
O25 C28 1.14(3) . ?
C31 C32 1.35(2) . ?
C31 C33 1.36(2) . ?
C33 C35 1.396(19) . ?
C33 H33 0.9300 . ?
C32 C34 1.41(2) . ?
C32 H32 0.9300 . ?
C35 C36 1.41(2) . ?
C35 C38 1.49(2) . ?
C34 C36 1.35(2) . ?
C34 C37 1.49(2) . ?
C36 H36 0.9300 . ?
C51 C53 1.327(18) . ?
C51 C52 1.389(17) . ?
C52 C54 1.353(19) . ?
C52 H52 0.9300 . ?
C53 C55 1.387(18) . ?
C53 H53 0.9300 . ?
C54 C56 1.42(2) . ?
C54 C57 1.56(2) . ?
C55 C56 1.444(17) . ?
C55 C58 1.46(2) . ?
C56 H56 0.9300 . ?
C58 Zn3 2.544(16) 4_575 ?
C48 C45 1.48(2) . ?
C48 Zn3 2.574(17) 6_564 ?
C45 C46 1.35(2) . ?
C45 C43 1.44(2) . ?
C15 C13B 1.59(7) . ?
C15 C13A 1.54(6) . ?
C43 C41 1.37(2) . ?
C43 H43 0.9300 . ?
C27 C24 1.47(3) . ?
C46 C44 1.39(2) . ?
C46 H46 0.9300 . ?
C41 C42 1.44(3) . ?
C47 C44 1.53(2) . ?
C44 C42 1.40(2) . ?
C42 H42 0.9300 . ?
C24 C22 1.36(3) . ?
C24 C26 1.41(3) . ?
C26 C25 1.33(3) . ?
C26 H26 0.9300 . ?
C22 C21 1.37(3) . ?
C22 H22 0.9300 . ?
C28 C25 1.53(4) . ?
C28 Zn1 2.59(2) 4_574 ?
C21 C923 1.40(4) . ?
C21 O21 1.43(3) . ?
C25 C923 1.39(4) . ?
N71 C75 1.43(2) . ?
N71 C74 1.47(2) . ?
N71 C73 1.49(2) . ?
N71 C72 1.51(3) . ?
C74 H74A 0.9600 . ?
C74 H74B 0.9600 . ?
C74 H74C 0.9600 . ?
C73 H73A 0.9600 . ?
C73 H73B 0.9600 . ?
C73 H73C 0.9600 . ?
C75 H75A 0.9600 . ?
C75 H75B 0.9600 . ?
C75 H75C 0.9600 . ?
C72 H72A 0.9600 . ?
C72 H72B 0.9600 . ?
C72 H72C 0.9600 . ?
N81 C82 1.49(2) . ?
N81 C83 1.50(2) . ?
N81 C85 1.55(3) . ?
N81 C84 1.55(3) . ?
C83 H83A 0.9600 . ?
C83 H83B 0.9600 . ?
C83 H83C 0.9600 . ?
C82 H82A 0.9600 . ?
C82 H82B 0.9600 . ?
C82 H82C 0.9600 . ?
C84 H84A 0.9600 . ?
C84 H84B 0.9600 . ?
C84 H84C 0.9600 . ?
C85 H85A 0.9600 . ?
C85 H85B 0.9600 . ?
C85 H85C 0.9600 . ?
C923 H923 0.9300 . ?
C63 N61 1.04(7) . ?
C63 H63A 0.9600 . ?
C63 H63B 0.9600 . ?
C63 H63C 0.9600 . ?
N61 C62 1.41(8) . ?
N61 H61A 0.9700 . ?
N61 H61B 0.9700 . ?
C62 H62A 0.9600 . ?
C62 H62B 0.9600 . ?
C62 H62C 0.9600 . ?
O11A C11A 1.36(8) . ?
C11A C12A 1.30(8) 3 ?
C11A C12A 1.30(8) . ?
C12A C13A 1.44(10) . ?
C12A H12A 0.9300 . ?
C13A C14A 1.34(7) . ?
C14A C13A 1.34(7) 3 ?
C14A H14A 0.9300 . ?
C11B C12B 1.37(5) 3 ?
C11B C12B 1.37(5) . ?
C11B O11B 1.44(9) . ?
C12B C13B 1.46(8) . ?
C12B H12B 0.9300 . ?
C13B C14B 1.30(9) . ?
C14B C13B 1.30(9) 3 ?
C14B H14B 0.9300 . ?
 
loop_
 _geom_angle_atom_site_label_1
 _geom_angle_atom_site_label_2
 _geom_angle_atom_site_label_3
 _geom_angle
 _geom_angle_site_symmetry_1
 _geom_angle_site_symmetry_3
 _geom_angle_publ_flag
O46 Zn3 O54 138.6(4) 6_565 4_574 ?
O46 Zn3 O52 100.1(4) 6_565 7_545 ?
O54 Zn3 O52 106.1(4) 4_574 7_545 ?
O46 Zn3 O51 102.7(4) 6_565 . ?
O54 Zn3 O51 105.1(4) 4_574 . ?
O52 Zn3 O51 97.2(4) 7_545 . ?
O46 Zn3 O55 92.9(4) 6_565 4_574 ?
O54 Zn3 O55 58.9(4) 4_574 4_574 ?
O52 Zn3 O55 84.9(4) 7_545 4_574 ?
O51 Zn3 O55 163.6(4) . 4_574 ?
O46 Zn3 C58 117.8(5) 6_565 4_574 ?
O54 Zn3 C58 29.6(4) 4_574 4_574 ?
O52 Zn3 C58 95.4(4) 7_545 4_574 ?
O51 Zn3 C58 134.4(5) . 4_574 ?
O55 Zn3 C58 29.4(4) 4_574 4_574 ?
O46 Zn3 C48 29.5(5) 6_565 6_565 ?
O54 Zn3 C48 115.8(5) 4_574 6_565 ?
O52 Zn3 C48 129.5(6) 7_545 6_565 ?
O51 Zn3 C48 97.8(4) . 6_565 ?
O55 Zn3 C48 93.2(5) 4_574 6_565 ?
C58 Zn3 C48 107.2(5) 4_574 6_565 ?
O35 Zn4 O33 127.4(4) 4_575 . ?
O35 Zn4 O51 114.1(4) 4_575 . ?
O33 Zn4 O51 96.3(4) . . ?
O35 Zn4 O53 98.8(4) 4_575 7_545 ?
O33 Zn4 O53 114.9(4) . 7_545 ?
O51 Zn4 O53 103.8(4) . 7_545 ?
O31 Zn2 O12 96.8(5) . . ?
O31 Zn2 O42 144.2(6) . . ?
O12 Zn2 O42 92.8(5) . . ?
O31 Zn2 O22 105.5(5) . . ?
O12 Zn2 O22 103.2(6) . . ?
O42 Zn2 O22 105.6(6) . . ?
O31 Zn2 O44 100.3(5) . . ?
O12 Zn2 O44 151.3(5) . . ?
O42 Zn2 O44 60.3(5) . . ?
O22 Zn2 O44 94.3(6) . . ?
O31 Zn2 C47 126.6(6) . . ?
O12 Zn2 C47 122.4(6) . . ?
O42 Zn2 C47 29.8(5) . . ?
O22 Zn2 C47 99.4(6) . . ?
O44 Zn2 C47 30.6(6) . . ?
O31 Zn2 Zn1 39.5(3) . . ?
O12 Zn2 Zn1 78.2(3) . . ?
O42 Zn2 Zn1 170.9(4) . . ?
O22 Zn2 Zn1 76.4(4) . . ?
O44 Zn2 Zn1 128.7(3) . . ?
C47 Zn2 Zn1 159.2(5) . . ?
O24 Zn1 O23 100.2(8) 4_575 . ?
O24 Zn1 O13 134.5(8) 4_575 . ?
O23 Zn1 O13 106.5(6) . . ?
O24 Zn1 O31 110.6(8) 4_575 . ?
O23 Zn1 O31 100.1(5) . . ?
O13 Zn1 O31 100.3(5) . . ?
O24 Zn1 C28 26.9(8) 4_575 4_575 ?
O23 Zn1 C28 127.1(7) . 4_575 ?
O13 Zn1 C28 116.1(7) . 4_575 ?
O31 Zn1 C28 101.6(7) . 4_575 ?
O24 Zn1 Zn2 145.4(7) 4_575 . ?
O23 Zn1 Zn2 77.9(4) . . ?
O13 Zn1 Zn2 77.2(3) . . ?
O31 Zn1 Zn2 38.4(3) . . ?
C28 Zn1 Zn2 139.6(6) 4_575 . ?
C31 O31 Zn2 124.3(10) . . ?
C31 O31 Zn1 118.1(9) . . ?
Zn2 O31 Zn1 102.1(5) . . ?
C38 O35 Zn4 113.9(9) . 4_574 ?
C37 O33 Zn4 114.8(10) . . ?
C51 O51 Zn4 119.6(8) . . ?
C51 O51 Zn3 118.3(9) . . ?
Zn4 O51 Zn3 108.7(4) . . ?
C58 O54 Zn3 99.6(9) . 4_575 ?
C58 O55 Zn3 80.5(9) . 4_575 ?
C27 O23 Zn1 129.8(12) . . ?
C28 O24 Zn1 110.7(18) . 4_574 ?
C47 O44 Zn2 81.0(13) . . ?
C27 O22 Zn2 126.9(14) . . ?
C15 O12 Zn2 123.4(10) . . ?
C15 O13 Zn1 129.1(11) . . ?
C47 O42 Zn2 94.6(11) . . ?
C48 O46 Zn3 101.2(10) . 6_564 ?
C57 O53 Zn4 114.6(9) . 7 ?
C57 O52 Zn3 128.8(9) . 7 ?
C32 C31 C33 122.9(17) . . ?
C32 C31 O31 116.7(15) . . ?
C33 C31 O31 120.4(16) . . ?
C31 C33 C35 120.4(15) . . ?
C31 C33 H33 119.8 . . ?
C35 C33 H33 119.8 . . ?
C31 C32 C34 118.0(16) . . ?
C31 C32 H32 121.0 . . ?
C34 C32 H32 121.0 . . ?
C33 C35 C36 116.5(14) . . ?
C33 C35 C38 120.9(14) . . ?
C36 C35 C38 122.6(15) . . ?
C36 C34 C32 120.1(16) . . ?
C36 C34 C37 118.2(16) . . ?
C32 C34 C37 121.7(15) . . ?
C34 C36 C35 122.1(16) . . ?
C34 C36 H36 119.0 . . ?
C35 C36 H36 119.0 . . ?
O34 C38 O35 122.7(14) . . ?
O34 C38 C35 123.1(16) . . ?
O35 C38 C35 114.3(14) . . ?
O32 C37 O33 123.3(16) . . ?
O32 C37 C34 118.8(16) . . ?
O33 C37 C34 117.7(14) . . ?
C53 C51 C52 122.9(13) . . ?
C53 C51 O51 121.0(12) . . ?
C52 C51 O51 116.0(11) . . ?
C54 C52 C51 117.3(13) . . ?
C54 C52 H52 121.4 . . ?
C51 C52 H52 121.4 . . ?
C51 C53 C55 121.8(13) . . ?
C51 C53 H53 119.1 . . ?
C55 C53 H53 119.1 . . ?
C52 C54 C56 123.0(13) . . ?
C52 C54 C57 120.4(13) . . ?
C56 C54 C57 116.5(13) . . ?
C53 C55 C56 117.8(12) . . ?
C53 C55 C58 125.0(12) . . ?
C56 C55 C58 117.1(12) . . ?
C54 C56 C55 116.7(13) . . ?
C54 C56 H56 121.6 . . ?
C55 C56 H56 121.6 . . ?
O55 C58 O54 120.9(14) . . ?
O55 C58 C55 121.0(14) . . ?
O54 C58 C55 118.1(14) . . ?
O55 C58 Zn3 70.1(8) . 4_575 ?
O54 C58 Zn3 50.9(7) . 4_575 ?
C55 C58 Zn3 168.6(12) . 4_575 ?
O45 C48 O46 122.7(16) . . ?
O45 C48 C45 122.7(16) . . ?
O46 C48 C45 114.5(17) . . ?
O45 C48 Zn3 73.5(10) . 6_564 ?
O46 C48 Zn3 49.4(8) . 6_564 ?
C45 C48 Zn3 163.6(14) . 6_564 ?
C46 C45 C43 118.0(15) . . ?
C46 C45 C48 123.3(14) . . ?
C43 C45 C48 118.7(15) . . ?
O13 C15 O12 129.0(16) . . ?
O13 C15 C13B 115(3) . . ?
O12 C15 C13B 115(3) . . ?
O13 C15 C13A 113(3) . . ?
O12 C15 C13A 118(3) . . ?
O52 C57 O53 128.8(13) . . ?
O52 C57 C54 115.3(13) . . ?
O53 C57 C54 116.0(13) . . ?
C41 C43 C45 121.7(15) . . ?
C41 C43 H43 119.2 . . ?
C45 C43 H43 119.2 . . ?
O22 C27 O23 123.7(19) . . ?
O22 C27 C24 116(2) . . ?
O23 C27 C24 119.8(17) . . ?
C45 C46 C44 121.9(14) . . ?
C45 C46 H46 119.0 . . ?
C44 C46 H46 119.0 . . ?
C43 C41 O41 125.7(17) . . ?
C43 C41 C42 118.9(16) . . ?
O41 C41 C42 115.4(17) . . ?
O42 C47 O44 123.5(18) . . ?
O42 C47 C44 121.4(17) . . ?
O44 C47 C44 115(2) . . ?
O42 C47 Zn2 55.6(10) . . ?
O44 C47 Zn2 68.4(10) . . ?
C44 C47 Zn2 176.6(15) . . ?
C46 C44 C42 121.0(15) . . ?
C46 C44 C47 123.3(15) . . ?
C42 C44 C47 115.3(17) . . ?
C44 C42 C41 117.9(18) . . ?
C44 C42 H42 121.0 . . ?
C41 C42 H42 121.0 . . ?
C22 C24 C26 119(2) . . ?
C22 C24 C27 122(2) . . ?
C26 C24 C27 119(2) . . ?
C25 C26 C24 121(3) . . ?
C25 C26 H26 119.7 . . ?
C24 C26 H26 119.7 . . ?
C24 C22 C21 121(2) . . ?
C24 C22 H22 119.3 . . ?
C21 C22 H22 119.3 . . ?
O25 C28 O24 125(3) . . ?
O25 C28 C25 120(2) . . ?
O24 C28 C25 115(3) . . ?
O25 C28 Zn1 82.6(16) . 4_574 ?
O24 C28 Zn1 42.4(12) . 4_574 ?
C25 C28 Zn1 157(2) . 4_574 ?
C22 C21 C923 117(3) . . ?
C22 C21 O21 124(3) . . ?
C923 C21 O21 116(3) . . ?
C26 C25 C923 120(3) . . ?
C26 C25 C28 121(3) . . ?
C923 C25 C28 119(3) . . ?
C75 N71 C74 108.9(13) . . ?
C75 N71 C73 111.1(12) . . ?
C74 N71 C73 111.9(14) . . ?
C75 N71 C72 110.5(16) . . ?
C74 N71 C72 108.2(16) . . ?
C73 N71 C72 106.0(16) . . ?
N71 C74 H74A 109.5 . . ?
N71 C74 H74B 109.5 . . ?
H74A C74 H74B 109.5 . . ?
N71 C74 H74C 109.5 . . ?
H74A C74 H74C 109.5 . . ?
H74B C74 H74C 109.5 . . ?
N71 C73 H73A 109.5 . . ?
N71 C73 H73B 109.5 . . ?
H73A C73 H73B 109.5 . . ?
N71 C73 H73C 109.5 . . ?
H73A C73 H73C 109.5 . . ?
H73B C73 H73C 109.5 . . ?
N71 C75 H75A 109.5 . . ?
N71 C75 H75B 109.5 . . ?
H75A C75 H75B 109.5 . . ?
N71 C75 H75C 109.5 . . ?
H75A C75 H75C 109.5 . . ?
H75B C75 H75C 109.5 . . ?
N71 C72 H72A 109.5 . . ?
N71 C72 H72B 109.5 . . ?
H72A C72 H72B 109.5 . . ?
N71 C72 H72C 109.5 . . ?
H72A C72 H72C 109.5 . . ?
H72B C72 H72C 109.5 . . ?
C82 N81 C83 111.1(16) . . ?
C82 N81 C85 107.0(17) . . ?
C83 N81 C85 110.6(16) . . ?
C82 N81 C84 105.8(16) . . ?
C83 N81 C84 111.5(18) . . ?
C85 N81 C84 110.7(17) . . ?
N81 C83 H83A 109.5 . . ?
N81 C83 H83B 109.5 . . ?
H83A C83 H83B 109.5 . . ?
N81 C83 H83C 109.5 . . ?
H83A C83 H83C 109.5 . . ?
H83B C83 H83C 109.5 . . ?
N81 C82 H82A 109.5 . . ?
N81 C82 H82B 109.5 . . ?
H82A C82 H82B 109.5 . . ?
N81 C82 H82C 109.5 . . ?
H82A C82 H82C 109.5 . . ?
H82B C82 H82C 109.5 . . ?
N81 C84 H84A 109.5 . . ?
N81 C84 H84B 109.5 . . ?
H84A C84 H84B 109.5 . . ?
N81 C84 H84C 109.5 . . ?
H84A C84 H84C 109.5 . . ?
H84B C84 H84C 109.5 . . ?
N81 C85 H85A 109.5 . . ?
N81 C85 H85B 109.5 . . ?
H85A C85 H85B 109.5 . . ?
N81 C85 H85C 109.5 . . ?
H85A C85 H85C 109.5 . . ?
H85B C85 H85C 109.5 . . ?
C25 C923 C21 120(3) . . ?
C25 C923 H923 120.0 . . ?
C21 C923 H923 120.0 . . ?
N61 C63 H63A 109.5 . . ?
N61 C63 H63B 109.5 . . ?
H63A C63 H63B 109.5 . . ?
N61 C63 H63C 109.5 . . ?
H63A C63 H63C 109.5 . . ?
H63B C63 H63C 109.5 . . ?
C63 N61 C62 124(8) . . ?
C63 N61 H61A 106.4 . . ?
C62 N61 H61A 106.4 . . ?
C63 N61 H61B 106.4 . . ?
C62 N61 H61B 106.4 . . ?
H61A N61 H61B 106.4 . . ?
N61 C62 H62A 109.5 . . ?
N61 C62 H62B 109.5 . . ?
H62A C62 H62B 109.5 . . ?
N61 C62 H62C 109.5 . . ?
H62A C62 H62C 109.5 . . ?
H62B C62 H62C 109.5 . . ?
C12A C11A C12A 109(9) 3 . ?
C12A C11A O11A 125(5) 3 . ?
C12A C11A O11A 125(5) . . ?
C11A C12A C13A 128(8) . . ?
C11A C12A H12A 116.0 . . ?
C13A C12A H12A 116.0 . . ?
C14A C13A C12A 108(6) . . ?
C14A C13A C15 120(5) . . ?
C12A C13A C15 117(5) . . ?
C13A C14A C13A 122(7) 3 . ?
C13A C14A H14A 119.1 3 . ?
C13A C14A H14A 119.1 . . ?
C12B C11B C12B 127(8) 3 . ?
C12B C11B O11B 116(4) 3 . ?
C12B C11B O11B 116(4) . . ?
C11B C12B C13B 111(5) . . ?
C11B C12B H12B 124.3 . . ?
C13B C12B H12B 124.3 . . ?
C14B C13B C12B 120(6) . . ?
C14B C13B C15 121(6) . . ?
C12B C13B C15 114(5) . . ?
C13B C14B C13B 117(10) . 3 ?
C13B C14B H14B 121.6 . . ?
C13B C14B H14B 121.6 3 . ?
 
loop_
 _geom_torsion_atom_site_label_1
 _geom_torsion_atom_site_label_2
 _geom_torsion_atom_site_label_3
 _geom_torsion_atom_site_label_4
 _geom_torsion
 _geom_torsion_site_symmetry_1
 _geom_torsion_site_symmetry_2
 _geom_torsion_site_symmetry_3
 _geom_torsion_site_symmetry_4
 _geom_torsion_publ_flag
Zn2 O31 C31 C32 -122.4(13) . . . . ?
Zn1 O31 C31 C32 106.8(14) . . . . ?
Zn2 O31 C31 C33 58.9(17) . . . . ?
Zn1 O31 C31 C33 -71.8(16) . . . . ?
C32 C31 C33 C35 -2(2) . . . . ?
O31 C31 C33 C35 176.8(12) . . . . ?
C33 C31 C32 C34 -1(2) . . . . ?
O31 C31 C32 C34 -179.3(12) . . . . ?
C31 C33 C35 C36 1.6(19) . . . . ?
C31 C33 C35 C38 -179.2(13) . . . . ?
C31 C32 C34 C36 3(2) . . . . ?
C31 C32 C34 C37 -176.8(14) . . . . ?
C32 C34 C36 C35 -4(2) . . . . ?
C37 C34 C36 C35 176.5(13) . . . . ?
C33 C35 C36 C34 1(2) . . . . ?
C38 C35 C36 C34 -178.0(13) . . . . ?
Zn4 O35 C38 O34 -2(2) 4_574 . . . ?
Zn4 O35 C38 C35 177.0(9) 4_574 . . . ?
C33 C35 C38 O34 -20(2) . . . . ?
C36 C35 C38 O34 159.3(16) . . . . ?
C33 C35 C38 O35 161.4(13) . . . . ?
C36 C35 C38 O35 -19(2) . . . . ?
Zn4 O33 C37 O32 0(2) . . . . ?
Zn4 O33 C37 C34 175.1(10) . . . . ?
C36 C34 C37 O32 -178.6(15) . . . . ?
C32 C34 C37 O32 2(2) . . . . ?
C36 C34 C37 O33 6(2) . . . . ?
C32 C34 C37 O33 -174.0(14) . . . . ?
Zn4 O51 C51 C53 40.0(17) . . . . ?
Zn3 O51 C51 C53 -96.4(14) . . . . ?
Zn4 O51 C51 C52 -142.0(10) . . . . ?
Zn3 O51 C51 C52 81.5(13) . . . . ?
C53 C51 C52 C54 2(2) . . . . ?
O51 C51 C52 C54 -176.2(12) . . . . ?
C52 C51 C53 C55 -4(2) . . . . ?
O51 C51 C53 C55 173.4(13) . . . . ?
C51 C52 C54 C56 5(2) . . . . ?
C51 C52 C54 C57 -180.0(13) . . . . ?
C51 C53 C55 C56 1(2) . . . . ?
C51 C53 C55 C58 177.4(14) . . . . ?
C52 C54 C56 C55 -8(2) . . . . ?
C57 C54 C56 C55 176.6(12) . . . . ?
C53 C55 C56 C54 5.0(19) . . . . ?
C58 C55 C56 C54 -171.8(13) . . . . ?
Zn3 O55 C58 O54 -2.9(14) 4_575 . . . ?
Zn3 O55 C58 C55 176.9(14) 4_575 . . . ?
Zn3 O54 C58 O55 3.5(17) 4_575 . . . ?
Zn3 O54 C58 C55 -176.3(12) 4_575 . . . ?
C53 C55 C58 O55 167.2(14) . . . . ?
C56 C55 C58 O55 -16(2) . . . . ?
C53 C55 C58 O54 -13(2) . . . . ?
C56 C55 C58 O54 163.6(13) . . . . ?
C53 C55 C58 Zn3 -27(6) . . . 4_575 ?
C56 C55 C58 Zn3 149(5) . . . 4_575 ?
Zn3 O46 C48 O45 -5.9(18) 6_564 . . . ?
Zn3 O46 C48 C45 176.7(11) 6_564 . . . ?
O45 C48 C45 C46 -147.8(17) . . . . ?
O46 C48 C45 C46 30(2) . . . . ?
Zn3 C48 C45 C46 39(5) 6_564 . . . ?
O45 C48 C45 C43 30(2) . . . . ?
O46 C48 C45 C43 -152.4(16) . . . . ?
Zn3 C48 C45 C43 -143(4) 6_564 . . . ?
Zn1 O13 C15 O12 8(3) . . . . ?
Zn1 O13 C15 C13B -169(2) . . . . ?
Zn1 O13 C15 C13A 180(2) . . . . ?
Zn2 O12 C15 O13 -22(3) . . . . ?
Zn2 O12 C15 C13B 154(2) . . . . ?
Zn2 O12 C15 C13A 166(3) . . . . ?
Zn3 O52 C57 O53 -48(2) 7 . . . ?
Zn3 O52 C57 C54 129.8(11) 7 . . . ?
Zn4 O53 C57 O52 -7(2) 7 . . . ?
Zn4 O53 C57 C54 175.0(9) 7 . . . ?
C52 C54 C57 O52 16(2) . . . . ?
C56 C54 C57 O52 -168.3(14) . . . . ?
C52 C54 C57 O53 -165.5(14) . . . . ?
C56 C54 C57 O53 10(2) . . . . ?
C46 C45 C43 C41 -4(3) . . . . ?
C48 C45 C43 C41 177.6(18) . . . . ?
Zn2 O22 C27 O23 -26(3) . . . . ?
Zn2 O22 C27 C24 147.3(17) . . . . ?
Zn1 O23 C27 O22 5(3) . . . . ?
Zn1 O23 C27 C24 -168.7(17) . . . . ?
C43 C45 C46 C44 2(3) . . . . ?
C48 C45 C46 C44 179.5(16) . . . . ?
C45 C43 C41 O41 -173.0(19) . . . . ?
C45 C43 C41 C42 8(3) . . . . ?
Zn2 O42 C47 O44 8(2) . . . . ?
Zn2 O42 C47 C44 -178.1(16) . . . . ?
Zn2 O44 C47 O42 -7(2) . . . . ?
Zn2 O44 C47 C44 178.6(16) . . . . ?
C45 C46 C44 C42 -3(3) . . . . ?
C45 C46 C44 C47 -175.4(17) . . . . ?
O42 C47 C44 C46 172(2) . . . . ?
O44 C47 C44 C46 -13(3) . . . . ?
O42 C47 C44 C42 -1(3) . . . . ?
O44 C47 C44 C42 173.5(18) . . . . ?
C46 C44 C42 C41 6(3) . . . . ?
C47 C44 C42 C41 179.4(17) . . . . ?
C43 C41 C42 C44 -9(3) . . . . ?
O41 C41 C42 C44 172.2(17) . . . . ?
O22 C27 C24 C22 1(4) . . . . ?
O23 C27 C24 C22 175(3) . . . . ?
O22 C27 C24 C26 175(2) . . . . ?
O23 C27 C24 C26 -11(4) . . . . ?
C22 C24 C26 C25 -8(5) . . . . ?
C27 C24 C26 C25 178(3) . . . . ?
C26 C24 C22 C21 -3(5) . . . . ?
C27 C24 C22 C21 171(3) . . . . ?
Zn1 O24 C28 O25 1(4) 4_574 . . . ?
Zn1 O24 C28 C25 -176(2) 4_574 . . . ?
C24 C22 C21 C923 15(5) . . . . ?
C24 C22 C21 O21 175(3) . . . . ?
C24 C26 C25 C923 5(5) . . . . ?
C24 C26 C25 C28 -176(3) . . . . ?
O25 C28 C25 C26 16(5) . . . . ?
O24 C28 C25 C26 -166(3) . . . . ?
Zn1 C28 C25 C26 -173(3) 4_574 . . . ?
O25 C28 C25 C923 -165(3) . . . . ?
O24 C28 C25 C923 12(5) . . . . ?
Zn1 C28 C25 C923 6(8) 4_574 . . . ?
C26 C25 C923 C21 8(6) . . . . ?
C28 C25 C923 C21 -171(3) . . . . ?
C22 C21 C923 C25 -18(5) . . . . ?
O21 C21 C923 C25 -180(4) . . . . ?
C12A C11A C12A C13A 26(11) 3 . . . ?
O11A C11A C12A C13A -165(5) . . . . ?
C11A C12A C13A C14A -33(10) . . . . ?
C11A C12A C13A C15 -172(5) . . . . ?
O13 C15 C13A C14A 34(6) . . . . ?
O12 C15 C13A C14A -153(5) . . . . ?
C13B C15 C13A C14A -72(22) . . . . ?
O13 C15 C13A C12A 169(4) . . . . ?
O12 C15 C13A C12A -18(6) . . . . ?
C13B C15 C13A C12A 62(22) . . . . ?
C12A C13A C14A C13A 40(10) . . . 3 ?
C15 C13A C14A C13A 178(4) . . . 3 ?
C12B C11B C12B C13B 3(12) 3 . . . ?
O11B C11B C12B C13B 168(5) . . . . ?
C11B C12B C13B C14B 19(8) . . . . ?
C11B C12B C13B C15 173(5) . . . . ?
O13 C15 C13B C14B -2(6) . . . . ?
O12 C15 C13B C14B -179(5) . . . . ?
C13A C15 C13B C14B 76(22) . . . . ?
O13 C15 C13B C12B -155(3) . . . . ?
O12 C15 C13B C12B 28(5) . . . . ?
C13A C15 C13B C12B -77(22) . . . . ?
C12B C13B C14B C13B -42(10) . . . 3 ?
C15 C13B C14B C13B 166(4) . . . 3 ?
 
_refine_diff_density_max    1.055
_refine_diff_density_min   -0.655
_refine_diff_density_rms    0.119

_shelxl_version_number 2013-4

_shelx_res_file
;
TITL p21 in P2(1)                New: Cmc21
CELL  0.71073  54.0760  15.3088  16.0309   90.000   90.000   90.000
ZERR     8.00   0.0040   0.0006   0.0006    0.000    0.000    0.000
LATT  -7
SYMM  - X, - Y, 1/2 + Z
SYMM  - X,   Y,   Z
SYMM    X, - Y, 1/2 + Z
SFAC  C    N    O    ZN   H
UNIT  368  24   180  32   364
MERG   2
ABIN
TWIN
FLAT  0.100 O11A C11A C12A C13B C14B
FMAP   2
PLAN   20
ACTA
BOND   $H
CONF
L.S.   100
WGHT    0.090100
BASF   0.06483
FVAR       0.04499
ZN3   4    0.252956    0.938994    0.549094    11.00000    0.03395    0.01696 =
         0.01880    0.00200    0.00178    0.00038
ZN4   4    0.200574    0.948778    0.650080    11.00000    0.03201    0.01747 =
         0.02821   -0.00012    0.00178    0.00192
ZN2   4    0.095554    0.674070    0.293497    11.00000    0.03017    0.03575 =
         0.08489   -0.00788    0.01468   -0.00544
ZN1   4    0.070278    0.848853    0.338115    11.00000    0.03880    0.04734 =
         0.08002   -0.00673    0.00586   -0.00777
O31   3    0.100855    0.778744    0.361881    11.00000    0.02650    0.03739 =
         0.07855    0.00562    0.00343   -0.00447
O34   3    0.164276    0.918538    0.161817    11.00000    0.10586    0.06215 =
         0.02277    0.00005    0.01874   -0.03842
O35   3    0.184057    1.006644    0.246447    11.00000    0.04154    0.03479 =
         0.01857    0.00663    0.00364   -0.01396
O32   3    0.159018    0.851202    0.597050    11.00000    0.17228    0.05527 =
         0.04678    0.01474   -0.01437   -0.04547
O33   3    0.186931    0.933333    0.538965    11.00000    0.02114    0.06197 =
         0.02824   -0.00738   -0.00574    0.00000
O51   3    0.229718    1.017804    0.615444    11.00000    0.02544    0.01814 =
         0.04120   -0.00676    0.00685   -0.00073
O54   3    0.243284    1.043871    0.929657    11.00000    0.05015    0.01620 =
         0.01692    0.00063    0.00183   -0.00126
O55   3    0.272256    1.145025    0.938611    11.00000    0.08165    0.02905 =
         0.02773    0.00524   -0.00670   -0.01591
O23   3    0.072072    0.855224    0.217326    11.00000    0.08817    0.03296 =
         0.09448   -0.00437   -0.00485    0.01319
O24   3    0.075258    1.033836   -0.134786    11.00000    0.22834    0.04918 =
         0.13421    0.02905   -0.00447   -0.01271
O44   3    0.134917    0.650582    0.246030    11.00000    0.06730    0.04786 =
         0.12264   -0.02801    0.02066    0.00773
O22   3    0.082936    0.718126    0.182701    11.00000    0.09882    0.02728 =
         0.07395    0.02136   -0.00559   -0.00642
O12   3    0.065145    0.633851    0.350277    11.00000    0.01839    0.04818 =
         0.09970    0.00661    0.01613    0.00118
O13   3    0.044882    0.763075    0.364325    11.00000    0.02542    0.04281 =
         0.08720   -0.01210    0.00847   -0.00734
O42   3    0.107249    0.551232    0.272193    11.00000    0.03300    0.07005 =
         0.12937   -0.00410    0.04921    0.01272
O45   3    0.213987    0.446177    0.036917    11.00000    0.04045    0.04930 =
         0.02482   -0.00086    0.00325    0.01887
O46   3    0.216476    0.560932    0.118337    11.00000    0.01916    0.04177 =
         0.03164    0.00612    0.00037    0.00674
O53   3    0.284925    1.342089    0.700066    11.00000    0.05000    0.02117 =
         0.02414    0.01040   -0.00689   -0.01107
O52   3    0.262029    1.322833    0.584535    11.00000    0.05199    0.02023 =
         0.02310   -0.00081   -0.00252    0.00879
O41   3    0.148046    0.267826    0.204660    11.00000    0.08333    0.05056 =
         0.12735   -0.01203    0.04885   -0.01904
O25   3    0.071829    1.077383   -0.009547    11.00000    0.14733    0.05202 =
         0.10084    0.01363    0.02922    0.00797
C31   1    0.123437    0.823321    0.368073    11.00000    0.03616    0.02053 =
         0.05428    0.00002    0.01500    0.00323
C33   1    0.134414    0.857148    0.298624    11.00000    0.01132    0.03694 =
         0.03340   -0.00652    0.00028   -0.00273
AFIX  43
H33   5    0.127313    0.848074    0.246504    11.00000   -1.20000
AFIX   0
C32   1    0.133084    0.832019    0.445239    11.00000    0.02284    0.03892 =
         0.05937   -0.00438    0.01421    0.00585
AFIX  43
H32   5    0.125099    0.808784    0.491584    11.00000   -1.20000
AFIX   0
C35   1    0.156247    0.905313    0.305301    11.00000    0.02205    0.02024 =
         0.02744   -0.00557    0.00409    0.01046
C34   1    0.155600    0.877332    0.453463    11.00000    0.04893    0.02038 =
         0.02100   -0.00927    0.01207    0.00274
C36   1    0.166224    0.914381    0.386205    11.00000    0.03877    0.01962 =
         0.04166   -0.00564    0.00468    0.00835
AFIX  43
H36   5    0.180585    0.946966    0.393295    11.00000   -1.20000
AFIX   0
C38   1    0.168228    0.943521    0.230165    11.00000    0.04954    0.02772 =
         0.02438    0.01951    0.01329    0.01143
C37   1    0.168270    0.886160    0.535587    11.00000    0.03868    0.01738 =
         0.03678    0.00667   -0.00029   -0.00172
C51   1    0.240114    1.078079    0.670942    11.00000    0.02480
C52   1    0.248592    1.155507    0.636023    11.00000    0.01869
AFIX  43
H52   5    0.246486    1.167512    0.579600    11.00000   -1.20000
AFIX   0
C53   1    0.242278    1.059855    0.751563    11.00000    0.01814
AFIX  43
H53   5    0.235235    1.008798    0.772153    11.00000   -1.20000
AFIX   0
C54   1    0.260043    1.212786    0.687437    11.00000    0.02938
C55   1    0.254749    1.114840    0.805945    11.00000    0.01942
C56   1    0.265186    1.194222    0.772340    11.00000    0.02617
AFIX  43
H56   5    0.274812    1.231356    0.804802    11.00000   -1.20000
AFIX   0
C58   1    0.257051    1.101121    0.895710    11.00000    0.03427
C48   1    0.206007    0.489710    0.093669    11.00000    0.03873    0.04746 =
         0.03335    0.02281   -0.01159   -0.01403
C45   1    0.182816    0.467804    0.138223    11.00000    0.03541    0.02817 =
         0.05723    0.00246    0.00339    0.00374
C15   1    0.046087    0.683057    0.362320    11.00000    0.02584    0.04653 =
         0.04494    0.00038    0.01205   -0.00562
C57   1    0.270082    1.301290    0.652984    11.00000    0.03064
C43   1    0.175689    0.377537    0.144822    11.00000    0.04313    0.02206 =
         0.07478   -0.00089    0.01855    0.00559
AFIX  43
H43   5    0.185392    0.335103    0.119285    11.00000   -1.20000
AFIX   0
C27   1    0.078265    0.795636    0.163536    11.00000    0.07790    0.04327 =
         0.08003    0.02296   -0.02095   -0.01857
C46   1    0.167532    0.528720    0.171027    11.00000    0.02280    0.03007 =
         0.04376    0.00303    0.01282    0.00292
AFIX  43
H46   5    0.171683    0.587442    0.166038    11.00000   -1.20000
AFIX   0
C41   1    0.154933    0.352470    0.187852    11.00000    0.07315    0.04463 =
         0.06606   -0.01917    0.03102   -0.01650
C47   1    0.127137    0.573366    0.244317    11.00000    0.05751    0.03049 =
         0.08254   -0.00818   -0.00363    0.01890
C44   1    0.145808    0.506100    0.211967    11.00000    0.05105    0.03379 =
         0.04300   -0.01411    0.01349    0.00440
C42   1    0.138302    0.418747    0.218026    11.00000    0.04466    0.05381 =
         0.08194    0.00285    0.00624   -0.01187
AFIX  43
H42   5    0.123048    0.404030    0.240835    11.00000   -1.20000
AFIX   0
C24   1    0.082686    0.819970    0.076163    11.00000    0.19845    0.04181 =
         0.06112    0.00319   -0.00361   -0.00692
C26   1    0.076027    0.904219    0.049524    11.00000    0.14420    0.05228 =
         0.05912    0.00815   -0.00949    0.00267
AFIX  43
H26   5    0.068467    0.942483    0.086672    11.00000   -1.20000
AFIX   0
C22   1    0.090841    0.761520    0.018513    11.00000    0.14088    0.04310 =
         0.10360    0.00618    0.05855   -0.02009
AFIX  43
H22   5    0.095968    0.706464    0.035896    11.00000   -1.20000
AFIX   0
C28   1    0.074957    1.023247   -0.057378    11.00000    0.07269    0.08901 =
         0.04676    0.02934    0.00433    0.00418
C21   1    0.091668    0.782075   -0.064888    11.00000    0.16499    0.07873 =
         0.11471    0.00005    0.04341   -0.01318
C25   1    0.080468    0.929742   -0.028670    11.00000    0.26584    0.07022 =
         0.09423   -0.02485    0.01071    0.00262
N71   2    0.205536    0.677572    0.355373    11.00000    0.04198    0.03761 =
         0.03061    0.00443    0.00179   -0.00026
C74   1    0.223762    0.609802    0.334764    11.00000    0.06285
AFIX  33
H74A  5    0.226979    0.574830    0.383272    11.00000   -1.50000
H74B  5    0.238837    0.636874    0.316546    11.00000   -1.50000
H74C  5    0.217385    0.573403    0.291002    11.00000   -1.50000
AFIX   0
C73   1    0.214017    0.734224    0.425624    11.00000    0.06225
AFIX  33
H73A  5    0.217097    0.698789    0.473926    11.00000   -1.50000
H73B  5    0.201452    0.776495    0.438274    11.00000   -1.50000
H73C  5    0.228954    0.763803    0.409827    11.00000   -1.50000
AFIX   0
C75   1    0.200607    0.728160    0.282292    11.00000    0.05100
AFIX  33
H75A  5    0.188458    0.771938    0.294897    11.00000   -1.50000
H75B  5    0.194476    0.690666    0.238974    11.00000   -1.50000
H75C  5    0.215576    0.755849    0.263926    11.00000   -1.50000
AFIX   0
C72   1    0.182241    0.633080    0.385527    11.00000    0.13125
AFIX  33
H72A  5    0.185918    0.598773    0.434096    11.00000   -1.50000
H72B  5    0.175934    0.595797    0.342332    11.00000   -1.50000
H72C  5    0.170076    0.676412    0.399307    11.00000   -1.50000
AFIX   0
N81   2    0.179383    0.807547    0.960207    11.00000    0.09218    0.06485 =
         0.06834    0.01119    0.00223    0.02404
C83   1    0.182003    0.759321    1.041122    11.00000    0.09497
AFIX  33
H83A  5    0.183282    0.697812    1.030290    11.00000   -1.50000
H83B  5    0.167785    0.770321    1.075410    11.00000   -1.50000
H83C  5    0.196619    0.778949    1.069477    11.00000   -1.50000
AFIX   0
C82   1    0.158469    0.870810    0.963699    11.00000    0.05977
AFIX  33
H82A  5    0.145745    0.852786    0.925652    11.00000   -1.50000
H82B  5    0.164277    0.927853    0.948373    11.00000   -1.50000
H82C  5    0.151911    0.872550    1.019323    11.00000   -1.50000
AFIX   0
C84   1    0.202773    0.862673    0.940556    11.00000    0.10551
AFIX  33
H84A  5    0.211948    0.835314    0.896447    11.00000   -1.50000
H84B  5    0.212930    0.866505    0.989533    11.00000   -1.50000
H84C  5    0.197900    0.920280    0.923537    11.00000   -1.50000
AFIX   0
C85   1    0.173795    0.743326    0.888075    11.00000    0.09157
AFIX  33
H85A  5    0.188948    0.717490    0.868978    11.00000   -1.50000
H85B  5    0.166103    0.774343    0.842957    11.00000   -1.50000
H85C  5    0.162866    0.698308    0.907545    11.00000   -1.50000
AFIX   0
O21   3    0.101699    0.726259   -0.128042    11.00000    0.37070    0.19070 =
         0.15846   -0.03525    0.06336    0.04784
C923  1    0.089783    0.870447   -0.085920    11.00000    0.28871    0.07547 =
         0.10695    0.02999    0.02138   -0.02437
AFIX  43
H923  5    0.094785    0.889453   -0.138374    11.00000   -1.20000
AFIX   0
C63   1    0.109216    0.951326    0.685356    11.00000    0.16565
AFIX  33
H63A  5    0.121446    0.983114    0.654327    11.00000   -1.50000
H63B  5    0.115695    0.936788    0.739354    11.00000   -1.50000
H63C  5    0.094681    0.986704    0.691747    11.00000   -1.50000
AFIX   0
N61   2    0.104686    0.894198    0.653484    11.00000    0.36445
AFIX  23
H61A  5    0.119995    0.861963    0.646639    11.00000   -1.20000
H61B  5    0.099548    0.911926    0.598039    11.00000   -1.20000
AFIX   0
C62   1    0.086903    0.833380    0.681595    11.00000    0.36520
AFIX  33
H62A  5    0.077505    0.812316    0.634943    11.00000   -1.50000
H62B  5    0.076015    0.861222    0.720714    11.00000   -1.50000
H62C  5    0.095102    0.785262    0.708236    11.00000   -1.50000
AFIX   0
PART    1
O11A  3    0.000000    0.408897    0.386191    10.25000    0.10477
C11A  1    0.000000    0.497699    0.382754    10.25000    0.06964
C12A  1    0.019470    0.546332    0.373932    10.50000    0.13317
AFIX  43
H12A  5    0.033733    0.517991    0.356095    10.50000   -1.20000
AFIX   0
C13A  1    0.021696    0.638761    0.388370    10.50000    0.03652
C14A  1    0.000000    0.676392    0.369051    10.25000    0.00761
AFIX  43
H14A  5   -0.000001    0.729901    0.341584    10.25000   -1.20000
AFIX   0
PART    2
C11B  1    0.000000    0.508394    0.419323    10.25000    0.10015
O11B  3    0.000000    0.416087    0.436071    10.25000    0.04949
C12B  1    0.022696    0.544653    0.403870    10.50000    0.03269
AFIX  43
H12B  5    0.037675    0.516406    0.413096    10.50000   -1.20000
AFIX   0
C13B  1    0.020403    0.633244    0.371085    10.50000    0.04885
C14B  1    0.000000    0.676054    0.381945    10.25000    0.05030
AFIX  43
H14B  5    0.000000    0.734767    0.396840    10.25000   -1.20000
AFIX   0
HKLF    4  1.0 -1.00  0.00 -2.00 -1.00  0.00  0.00  0.00  1.00  0.00

REM  p21 in P2(1)                New: Cmc21
REM R1 =  0.1060 for    7003 Fo > 4sig(Fo)  and  0.2127 for all   15288 data
REM    589 parameters refined using      3 restraints

END

WGHT      0.0903      0.0000

REM Highest difference peak  1.055,  deepest hole -0.655,  1-sigma level  0.119
Q1    1   0.2514  0.9412  0.4876  11.00000  0.05    1.05
Q2    1   0.2518  0.9412  0.6102  11.00000  0.05    0.89
Q3    1   0.2004  0.9503  0.5876  11.00000  0.05    0.87
Q4    1   0.2008  0.9507  0.7121  11.00000  0.05    0.78
Q5    1   0.0373  0.9170  0.3204  11.00000  0.05    0.73
Q6    1   0.0983  0.6748  0.3606  11.00000  0.05    0.68
Q7    1   0.0929  0.8009  0.6624  11.00000  0.05    0.61
Q8    1   0.1979  0.5777  0.3516  11.00000  0.05    0.61
Q9    1   0.2726  0.9335  0.5530  11.00000  0.05    0.59
Q10   1   0.2194  0.9478  0.6587  11.00000  0.05    0.59
Q11   1   0.2303  0.6637  0.3833  11.00000  0.05    0.54
Q12   1   0.1692  0.7223  1.0439  11.00000  0.05    0.53
Q13   1   0.1371  0.7728  1.1458  11.00000  0.05    0.53
Q14   1   0.0000  0.8634  0.2153  10.50000  0.05    0.51
Q15   1   0.2892  1.3047  0.6471  11.00000  0.05    0.51
Q16   1   0.2014  0.4560  0.1516  11.00000  0.05    0.51
Q17   1   0.1323  0.8479  0.5141  11.00000  0.05    0.50
Q18   1   0.2885  1.3346  0.6389  11.00000  0.05    0.48
Q19   1   0.2328  0.9401  0.5460  11.00000  0.05    0.48
Q20   1   0.0619  0.8980 -0.0530  11.00000  0.05    0.47
;
_shelx_res_checksum   55438

_shelx_hkl_file
;
   0   0   4   42.82    4.01
   0   0  -4   45.79    3.64
   0   0   5   15.27    3.43
   0   0  -5   12.34    2.95
   0   0   6 1146.14  117.56
   0   0  -6 1299.61  127.78
   0   0   7    3.21    3.70
   0   0  -7   -0.28    2.71
   0   0   8   54.80    6.60
   0   0  -8   40.11    4.84
   0   0   9  383.92   29.35
   0   0  -9  340.38   25.23
   0   0  10   87.41    8.84
   0   0 -10   72.56    8.44
   0   0  11  197.81   16.07
   0   0 -11  171.79   13.25
   0   0  12  149.51   13.07
   0   0 -12  124.24   10.12
   0   0  13   71.67    9.04
   0   0 -13   70.99    6.99
   0   0  14  142.28   13.31
   0   0 -14  121.44   10.29
   0   0  15  196.77   18.69
   0   0  16   16.82    5.95
   0   0  17  113.78   15.74
   0   0  18   56.86    9.34
   0   0  19   42.81    8.04
   0   0  20  124.06   14.18
   0   0  21   15.59    6.78
   0   0  22  177.16   23.38
   0   0  23    0.78    5.98
   0   0  24   -0.10    6.31
   0   0  25   -2.71    6.88
   0   0  26   -0.13    6.72
   0   0  27    0.70    7.00
   0   0  28   -3.67   10.21
   0   0  29   11.64    9.24
   0   0  30   38.55   13.25
   0   0  31    9.29    9.59
   0   0  32    3.93    8.73
   0   0  33   -2.36    9.36
   0   0  34   21.24   16.31
   0   0  35  -14.78   15.68
   0  -1   4    1.95    3.08
   0   1   4   -1.82    3.38
   0   1   4    1.54    2.18
   0  -1  -4   -0.59    1.83
   0   1  -4   -0.06    2.07
   0  -1   5    2.32    2.87
   0   1   5   -1.93    2.53
   0  -1  -5   -0.13    2.27
   0   1  -5    2.09    2.36
   0   1   6    2.75    3.02
   0  -1   6   -0.64    3.31
   0   1  -6    0.67    2.70
   0  -1  -6    0.00    2.55
   0   1   7    0.50    3.24
   0  -1   7    0.78    3.67
   0   1  -7   -2.29    2.73
   0  -1  -7    0.52    3.84
   0   1   8    0.86    3.71
   0  -1   8    2.27    4.04
   0   1  -8   -0.40    2.83
   0  -1  -8    1.00    2.76
   0  -1   9    2.11    3.82
   0   1   9    1.55    3.66
   0   1  -9   -0.29    2.85
   0  -1  -9   -0.94    2.99
   0  -1  10   -2.73    4.19
   0   1  10   -1.82    3.74
   0  -1 -10    0.71    2.72
   0   1 -10    3.00    3.10
   0   1  11   -0.74    3.61
   0  -1  11   -1.08    5.47
   0   1 -11   -0.40    3.09
   0  -1 -11    1.29    2.82
   0   1  12   -2.95    3.96
   0  -1  12    2.38    4.38
   0   1 -12   -0.41    2.83
   0  -1 -12   -2.27    2.91
   0  -1  13    4.47    4.43
   0   1  13    4.26    5.61
   0   1 -13    0.77    3.07
   0  -1 -13    2.31    4.34
   0   1  14   -2.07    3.98
   0  -1  14    0.86    4.26
   0   1 -14   -1.86    3.09
   0  -1 -14    1.67    2.92
   0  -1  15   -1.79    4.75
   0   1  15   -2.90    4.31
   0  -1 -15   -0.94    3.06
   0   1  16   -0.52    4.37
   0  -1  16   -0.76    4.43
   0  -1  17    7.96    4.79
   0   1  17   -3.33    4.66
   0   1  18    0.80    5.01
   0  -1  18   -2.22    4.94
   0   1  19    0.67    5.11
   0  -1  19    0.36    4.72
   0  -1  20   -1.82    5.42
   0   1  20    3.22    5.47
   0   1  21    3.00    5.60
   0  -1  21    1.06    6.02
   0  -1  22    0.65    6.27
   0   1  22   -6.75    6.13
   0  -1  23    1.81    6.17
   0   1  23    7.24    6.57
   0  -1  24    4.33    6.82
   0   1  24    3.80    6.55
   0  -1  25    0.22    6.11
   0   1  25   -1.67    6.69
   0   1  26    3.93    8.88
   0  -1  26   -0.59    7.29
   0   1  27   -1.05    9.83
   0  -1  27    4.16    7.24
   0  -1  28   -5.21   10.23
   0   1  28    0.58    6.96
   0  -1  29  -16.21    8.28
   0   1  29    2.23    8.17
   0   1  30   -7.33    7.91
   0  -1  30    2.15    8.73
   0   1  31  -13.33    7.93
   0  -1  31    8.79    8.43
   0   1  32   15.54    9.75
   0  -1  32   17.49   10.38
   0   1  33   -0.53    8.64
   0  -1  33    2.45   11.75
   0   1  34   -0.31    9.42
   0  -1  34    7.07   10.21
   0   1  35   -0.39   10.04
   0  -1  35    6.27   10.34
   0  -2   3  124.18    8.06
   0   2   3  127.04    6.98
   0   2   3  132.12   11.44
   0   2  -3  140.71    8.26
   0  -2  -3  133.95    8.33
   0  -2  -3  130.19    9.74
   0  -2   4   33.47    4.30
   0   2   4   33.13    3.63
   0   2   4   34.38    5.45
   0  -2  -4   30.20    3.08
   0   2  -4   31.36    3.85
   0  -2  -4   31.32    5.70
   0   2   5   21.97    3.25
   0   2   5   17.20    5.34
   0  -2   5   14.25    3.88
   0  -2  -5    9.92    6.07
   0   2  -5   20.13    3.34
   0  -2  -5   14.98    2.78
   0  -2   6   54.09    7.01
   0   2   6   84.35    9.02
   0   2   6   90.16    8.81
   0   2  -6   87.28    6.80
   0  -2  -6   62.72    5.53
   0   2   7   44.39    5.49
   0  -2   7   41.63    5.95
   0   2   7   53.61   10.11
   0   2  -7   38.81    4.87
   0  -2  -7   44.68    6.20
   0  -2   8   85.77    8.41
   0   2   8   81.47    9.90
   0   2   8   81.33   10.34
   0   2  -8   79.72    7.15
   0  -2  -8   78.73    6.75
   0  -2   9  101.95    9.60
   0   2   9  106.97   16.55
   0   2   9  102.71    9.25
   0  -2  -9  112.01    8.20
   0   2  -9   89.22   10.38
   0  -2  10   71.97    8.24
   0   2  10   89.20    9.79
   0   2  10   71.14   12.62
   0   2 -10   66.95    6.60
   0  -2 -10   51.81    7.40
   0   2  11   77.19   10.88
   0  -2  11   98.72    9.38
   0   2  11   81.26   10.54
   0  -2 -11   75.09    7.10
   0   2 -11   72.59    6.92
   0   2  12  152.97   16.81
   0   2  12  176.04   13.87
   0  -2  12  147.58   14.12
   0   2 -12  143.06   11.65
   0  -2 -12  177.12   14.32
   0  -2  13   -2.16    4.39
   0   2  13    7.03    7.24
   0   2  13    4.02    3.84
   0   2 -13    2.31    2.99
   0  -2 -13   -0.54    3.85
   0   2  14   31.94   10.98
   0  -2  14   44.34    7.42
   0   2  14   43.12    6.13
   0   2 -14   39.16    5.28
   0  -2 -14   44.87    6.91
   0   2  15  271.28   28.17
   0  -2  15  292.17   24.84
   0   2  15  291.72   24.05
   0  -2 -15  245.90   23.34
   0   2  16   50.50    7.68
   0  -2  16   51.94   10.51
   0  -2  17   49.38    8.12
   0   2  17   37.60   10.03
   0  -2  18  248.86   24.27
   0   2  18  239.17   22.29
   0  -2  19    8.16    6.01
   0   2  19    9.37    5.75
   0  -2  20    2.39    5.70
   0   2  20   -1.06    5.36
   0   2  21  152.86   17.49
   0  -2  21  161.75   18.90
   0  -2  22   12.58    7.63
   0   2  22   15.71    6.89
   0  -2  23    8.42    7.24
   0   2  23    2.42    6.41
   0   2  24   47.54    9.68
   0  -2  24   37.21   10.02
   0  -2  25   25.93    8.50
   0   2  25   12.99    8.16
   0  -2  26    1.37   10.45
   0   2  26    8.73   10.10
   0   2  27    3.49   11.74
   0  -2  27   23.79    9.26
   0   2  28    0.26    9.80
   0  -2  28   -3.91    7.97
   0   2  29   34.72   14.12
   0  -2  29   12.78   14.47
   0   2  30    4.07   12.14
   0  -2  30   15.81    9.58
   0   2  31   18.28   14.61
   0  -2  31   35.12   11.35
   0   2  32   10.66   12.64
   0  -2  32    3.52   13.57
   0  -2  33    7.59    9.25
   0   2  33   -7.33   12.02
   0   2  34   14.01   11.06
   0  -2  34   23.54   12.49
   0  -3   0    1.28    2.86
   0   3   0    0.93    2.16
   0  -3   0    0.23    1.96
   0  -3   1    2.69    2.03
   0   3   1    0.82    2.65
   0  -3   1   -0.84    2.33
   0   3   1   -2.23    2.57
   0   3  -1   -0.01    1.87
   0  -3  -1   -0.32    2.97
   0   3  -1    0.93    3.63
   0  -3  -1   -2.27    2.45
   0   3   2   -3.36    4.21
   0  -3   2    1.52    2.30
   0   3   2    0.60    1.98
   0   3   2    1.49    2.17
   0  -3  -2    0.55    1.34
   0   3  -2    2.30    2.20
   0   3  -2   -2.83    2.90
   0  -3  -2    3.18    3.56
   0  -3  -2   -1.91    2.51
   0  -3   3    0.37    2.78
   0   3   3   -0.74    4.52
   0   3   3    0.60    2.04
   0   3   3   -1.10    0.41
   0   3   3    1.29    3.61
   0   3  -3    4.60    3.31
   0  -3  -3   -0.72    3.27
   0  -3  -3    1.20    3.90
   0  -3  -3   -2.54    2.71
   0  -3  -3   -0.53    1.30
   0   3   4    1.12    2.22
   0   3   4   -1.21    3.15
   0   3   4    0.62    0.94
   0  -3   4   -0.93    3.00
   0  -3  -4    4.58    3.98
   0   3  -4    0.77    2.82
   0  -3  -4    1.92    2.06
   0  -3  -4    6.69    3.96
   0   3   5    2.88    3.51
   0   3   5    0.45    1.94
   0   3   5    0.73    5.12
   0  -3   5    5.33    3.31
   0  -3  -5   -1.26    2.33
   0  -3  -5   -5.45    4.50
   0  -3  -5   -2.68    3.00
   0   3  -5    1.65    2.71
   0  -3   6    4.01    3.48
   0  -3   6   -1.71    3.44
   0   3   6   -1.95    1.88
   0   3   6    0.98    2.79
   0   3   6   -0.47    4.05
   0  -3  -6   -1.15    4.83
   0   3  -6    0.62    2.91
   0  -3  -6   -0.59    2.31
   0   3   7   -1.79    2.71
   0  -3   7   -3.10    3.62
   0   3   7   -1.75    4.46
   0  -3  -7   -0.34    5.57
   0   3  -7    0.73    2.99
   0  -3  -7    0.84    3.21
   0   3   8   -4.40    4.70
   0   3   8    0.64    3.12
   0  -3   8   -2.71    3.68
   0   3  -8    0.39    3.01
   0  -3  -8   -2.02    3.37
   0  -3   9    0.77    3.75
   0   3   9    0.69    6.26
   0   3   9    9.00    4.50
   0  -3  -9   -1.87    3.54
   0   3  -9   -5.17    3.00
   0   3  10    1.09    5.00
   0  -3  10   -4.44    3.89
   0   3  10   -2.17    4.61
   0   3 -10   -4.11    3.15
   0  -3 -10   -0.36    2.82
   0   3  11    0.76    3.42
   0  -3  11    2.32    4.10
   0   3  11   -3.00    6.79
   0  -3 -11    5.67    3.82
   0   3 -11    3.25    3.12
   0   3  12    1.35    3.46
   0   3  12    1.80    6.59
   0  -3  12   -4.12    4.22
   0   3 -12    1.25    3.14
   0  -3 -12    4.72    3.83
   0  -3  13   -1.18    3.81
   0   3  13   -1.41    3.63
   0   3  13    1.63    5.05
   0  -3 -13   -0.03    2.67
   0   3 -13    0.74    2.86
   0  -3  14    2.11    5.70
   0   3  14   -3.55    3.76
   0   3  14   -3.23    7.00
   0  -3 -14   -1.26    2.77
   0  -3  15    5.89    5.71
   0   3  15   -1.45    5.59
   0   3  15   -0.98    3.90
   0  -3 -15   -0.01    2.98
   0  -3  16   -2.88    6.52
   0   3  16    1.02    5.31
   0   3  17   -0.07    4.15
   0  -3  17   -3.24    5.13
   0  -3  18    5.06    5.52
   0   3  18    6.11    6.77
   0  -3  19    3.57    5.47
   0   3  19    2.71    5.02
   0  -3  20    4.56    5.54
   0   3  20   -2.42    4.89
   0   3  21   -3.97    7.67
   0  -3  21   10.36    6.40
   0   3  22    0.05    5.28
   0  -3  22   -0.74    5.72
   0  -3  23   14.11    9.25
   0   3  23    0.73    5.93
   0   3  24   -2.42    6.30
   0  -3  24   10.15    6.96
   0   3  25   -2.31    6.75
   0  -3  25   12.58    9.57
   0  -3  26    7.79    8.16
   0   3  26    5.30    7.20
   0   3  27    1.11    9.89
   0  -3  27    8.24   10.59
   0   3  28   15.43   10.41
   0  -3  28    2.25    8.54
   0   3  29    4.88    8.73
   0  -3  29   34.57   10.25
   0   3  30   14.03    8.85
   0  -3  30   -0.48    9.82
   0  -3  31   -9.92    8.56
   0   3  31   12.55    8.43
   0   3  32   13.32   10.50
   0  -3  32   35.31   15.65
   0   3  32   13.34   10.17
   0   3  33   -0.80    8.90
   0   3  33    9.67    9.47
   0  -3  33    5.55    9.88
   0   3  34   -5.71    9.97
   0   3  34    7.43    9.76
   0  -3  34    0.02   10.24
   0  -3  34  -17.46   11.14
   0   4   0  458.82   33.06
   0  -4   0  386.46   29.17
   0  -4   0  403.36   28.42
   0   4   1   27.03    4.26
   0   4   1   28.26    4.83
   0  -4   1   28.09    5.22
   0  -4   1   30.48    5.11
   0   4  -1   27.35    4.39
   0  -4  -1   27.99    4.10
   0  -4  -1   26.32    4.51
   0   4  -1   32.41    5.93
   0  -4   2  455.28   33.23
   0   4   2  518.43   43.88
   0   4   2  496.17   36.83
   0   4   2  477.20   33.40
   0  -4  -2  457.39   34.09
   0   4  -2  493.24   37.15
   0  -4  -2  507.09   36.86
   0   4  -2  471.10   36.08
   0   4   3  455.46   44.95
   0   4   3  466.51   35.61
   0   4   3  450.32   31.17
   0  -4   3  461.81   36.84
   0   4  -3  462.47   32.96
   0   4  -3  481.89   41.43
   0  -4  -3  442.73   37.73
   0  -4  -3  456.95   33.38
   0   4   4  241.29   15.86
   0  -4   4  266.85   21.37
   0   4   4  259.74   20.31
   0  -4  -4  252.33   13.25
   0  -4  -4  274.50   22.41
   0  -4  -4  273.45   18.51
   0  -4  -4  274.70   21.28
   0   4  -4  262.13   17.93
   0   4   5   28.70    4.99
   0  -4   5   35.62    5.22
   0   4   5   27.99    5.21
   0  -4  -5   44.69    6.60
   0  -4  -5   34.02    4.77
   0   4  -5   38.08    4.69
   0  -4  -5   41.80    8.95
   0   4   6   93.10    7.13
   0  -4   6   95.89    8.68
   0   4   6  102.76   11.70
   0  -4  -6  107.49   14.68
   0   4  -6  103.60    7.98
   0  -4  -6   84.81   10.11
   0  -4  -6  107.49    8.36
   0  -4   7  148.96   12.69
   0   4   7  152.13    9.19
   0   4   7  162.12   12.88
   0   4   7  168.63   18.16
   0  -4  -7  156.50   14.39
   0  -4  -7  142.92   18.97
   0   4  -7  144.77   10.91
   0  -4  -7  154.33   12.08
   0   4   8   36.11    4.46
   0   4   8   51.28    6.67
   0   4   8   67.62    9.69
   0  -4   8   61.12    6.70
   0   4  -8   43.33    6.59
   0  -4  -8   55.59    6.15
   0  -4  -8   64.94   11.91
   0  -4   9   64.08    7.67
   0   4   9   58.60   10.11
   0   4   9   59.65    4.94
   0  -4   9   50.53    7.41
   0   4   9   50.86    7.70
   0  -4  -9   63.76    5.55
   0   4  -9   50.96    5.91
   0   4  10   32.62    7.04
   0  -4  10   37.33    6.02
   0   4  10   29.69    3.94
   0   4 -10   30.66    4.88
   0  -4 -10   36.12    4.28
   0   4  11  113.26    9.59
   0  -4  11  112.46   11.24
   0   4  11  109.55   12.61
   0  -4 -11  106.82    8.33
   0   4 -11  111.34    9.40
   0  -4  12   15.57    5.03
   0   4  12    7.15    7.68
   0   4  12   12.38    3.92
   0  -4 -12    4.37    4.38
   0   4 -12    7.50    3.61
   0  -4  13  121.54   12.73
   0   4  13  126.64   18.93
   0   4  13  155.78   11.92
   0  -4 -13  138.73   12.40
   0   4  14   66.11   14.89
   0   4  14  100.01    8.90
   0  -4  14   80.23    9.53
   0  -4 -14   74.95    9.30
   0   4  15   56.22    7.65
   0   4  15   54.22   10.77
   0  -4  15   62.68    8.80
   0  -4 -15   53.27    6.13
   0  -4  16  244.31   23.37
   0   4  16  272.97   23.49
   0   4  17   67.08    9.24
   0  -4  17  102.41   11.34
   0   4  18   21.71    8.96
   0  -4  18   51.28    8.02
   0  -4  19   41.25    7.96
   0   4  19   31.96    7.41
   0   4  20   58.69   11.69
   0  -4  20   45.04   12.67
   0   4  21   13.45    6.31
   0  -4  21   24.26    8.47
   0   4  22   44.74    9.02
   0  -4  23   32.08   10.92
   0   4  23   54.60    9.99
   0   4  24   13.86    6.68
   0  -4  24   -3.59    8.22
   0   4  25   40.27   10.41
   0  -4  25   52.05   12.21
   0  -4  26   43.54   15.16
   0   4  26   30.86   13.65
   0  -4  27   -0.06    8.77
   0   4  27   12.36    7.83
   0   4  28    1.80   10.93
   0   4  28  -15.01    7.37
   0  -4  28    9.65    8.39
   0  -4  29   12.71    9.84
   0   4  29    0.36   17.56
   0   4  29   12.29    8.36
   0  -4  30   -5.77   12.15
   0   4  30    4.00    7.94
   0   4  30    2.48   13.36
   0  -4  31   25.79   10.50
   0  -4  31    3.26   11.70
   0   4  31    7.16    9.32
   0   4  31   24.82   13.50
   0  -4  32   18.93   11.50
   0   4  32   12.28   13.15
   0  -4  32   12.39   16.55
   0   4  32   13.23   10.00
   0  -4  33   -9.57    6.39
   0  -4  33    3.73   11.40
   0   4  33   26.07   12.01
   0   4  33   16.74   10.41
   0   4  34    4.58   12.49
   0  -4  34    0.54   11.11
   0  -5   0   -1.41    4.06
   0  -5   0   -0.29    2.79
   0   5   0   -3.50    4.04
   0  -5   1   -0.46    3.95
   0   5   1   -0.91    3.53
   0   5   1    0.00    2.20
   0  -5   1   -0.83    3.61
   0   5  -1   -1.01    3.16
   0  -5  -1    1.19    3.11
   0  -5  -1   -0.57    3.87
   0   5  -1    0.46    4.17
   0   5   2    3.81    3.08
   0  -5   2    0.58    2.77
   0   5   2    0.19    5.24
   0   5   2   -0.51    2.60
   0   5  -2    0.74    4.69
   0  -5  -2    1.24    3.07
   0  -5  -2   -1.15    2.97
   0   5   3    0.02    2.41
   0  -5   3   -3.99    4.06
   0   5   3   -3.13    5.44
   0   5   3   -2.43    2.49
   0  -5  -3    1.43    3.39
   0   5  -3    0.51    3.42
   0   5  -3    2.48    4.94
   0  -5   4    1.20    3.14
   0   5   4    0.16    3.53
   0   5   4   -5.17    5.17
   0   5   4   -1.15    3.47
   0  -5  -4    4.31    4.95
   0  -5  -4    0.52    1.28
   0   5  -4   -0.68    3.77
   0   5  -4    1.94    2.68
   0  -5  -4    1.03    2.97
   0  -5   5    0.24    3.26
   0   5   5    1.29    3.36
   0  -5  -5    3.32    4.50
   0   5  -5   -1.03    2.74
   0   5  -5   -0.45    2.83
   0  -5  -5   -3.18    5.83
   0  -5  -5    2.30    2.28
   0   5   6    4.16    4.72
   0   5   6    1.38    3.65
   0  -5   6    4.53    3.67
   0   5  -6    3.63    2.80
   0  -5  -6    7.57    4.56
   0  -5  -6    1.30    3.37
   0  -5  -6    3.14    6.51
   0   5   7    1.95    3.44
   0   5   7    1.03    3.34
   0  -5   7   -3.41    3.47
   0   5  -7   -0.28    2.73
   0  -5  -7   -2.36    2.28
   0  -5  -7   -5.29    6.50
   0  -5  -7    5.76    4.59
   0   5   8   -4.15    3.49
   0  -5   8    5.98    3.55
   0   5   8   -0.51    1.80
   0   5   8   -1.61    3.66
   0  -5  -8   -0.35    6.57
   0  -5  -8    1.02    2.92
   0   5  -8    1.94    2.69
   0  -5  -8   -2.49    4.17
   0   5   9   -0.18    2.60
   0   5   9    0.75    3.50
   0   5   9    2.00    1.68
   0  -5   9   -0.04    3.87
   0  -5  -9   -3.43    4.23
   0  -5  -9   -0.63    2.35
   0  -5  -9    0.93    5.12
   0   5  -9   -1.42    2.77
   0  -5  10    0.75    3.76
   0   5  10    0.24    2.99
   0   5  10   -0.59    4.10
   0   5  10   -1.37    2.35
   0  -5 -10   -0.34    2.77
   0   5 -10    3.22    3.88
   0  -5 -10   -0.02    2.56
   0  -5 -10   -5.68    5.40
   0   5  11    0.34    4.52
   0   5  11   -2.42    2.19
   0   5  11    5.05    4.23
   0  -5  11    8.63    4.22
   0  -5 -11   -3.03    3.57
   0   5 -11    2.45    2.79
   0   5  12   -0.17    4.49
   0   5  12    4.30    4.76
   0   5  12   -0.51    3.01
   0  -5  12   -2.17    4.41
   0   5 -12   -0.77    3.03
   0  -5 -12    4.72    3.54
   0   5  13    3.40    5.04
   0  -5  13    0.75    2.57
   0   5  13   -0.30    3.38
   0  -5  13   -0.71    4.23
   0   5  13   -0.52    2.83
   0  -5 -13   -1.47    2.55
   0   5  14   -0.12    2.94
   0   5  14    2.80    4.96
   0   5  14    1.58    5.22
   0  -5  14    5.61    4.72
   0  -5  14   -0.53    4.44
   0  -5 -14   -0.92    2.86
   0   5  15    2.13    3.81
   0  -5  15    2.46    4.50
   0  -5  15    2.61    4.95
   0   5  15    1.78    3.23
   0  -5 -15   -0.02    3.15
   0  -5  16    0.83    5.24
   0   5  16    0.13    3.51
   0   5  16   -1.13    3.84
   0  -5  17   -4.13    5.01
   0   5  17   -1.53    4.32
   0   5  17   -0.46    4.29
   0  -5  18    2.74    5.37
   0   5  18   -0.32    4.78
   0   5  18    5.00    4.50
   0   5  19   -3.10    6.15
   0   5  19   -4.34    5.02
   0  -5  19    0.83    5.32
   0   5  20   -1.66    5.15
   0   5  20   -1.20    4.64
   0  -5  20    2.98    5.31
   0  -5  21   -1.38    5.86
   0   5  21    4.35    4.78
   0   5  21   -4.32    5.42
   0   5  22   -1.15    4.68
   0   5  22   -0.06    5.44
   0  -5  22    9.36    6.21
   0   5  23   -3.13    8.11
   0   5  23    5.35    6.66
   0  -5  23   11.30    7.46
   0   5  24    3.02    6.78
   0  -5  24    1.60    7.48
   0   5  24    6.47    6.33
   0  -5  25    1.94    7.24
   0  -5  25    3.36    7.46
   0   5  25   14.35    9.14
   0   5  25    1.53    5.40
   0  -5  26   -5.04    8.19
   0   5  26   -0.91    7.57
   0  -5  26    5.47    7.97
   0   5  26    3.78    6.34
   0  -5  27   -5.36    8.41
   0   5  27   -4.39    7.43
   0   5  27   -1.00    6.98
   0  -5  27    1.72    8.87
   0   5  28   -3.10    8.66
   0  -5  28   -0.80    9.64
   0  -5  28   -6.26    6.21
   0   5  28  -12.18    7.74
   0  -5  29   26.15   11.15
   0   5  29    2.73   11.69
   0   5  29    7.27    9.69
   0  -5  29   15.66    6.42
   0   5  30   -2.43   10.64
   0  -5  30   18.11   10.33
   0   5  30    0.77    6.54
   0   5  31    0.92    8.44
   0  -5  31    3.06   10.78
   0   5  31   29.69   13.23
   0   5  32    3.89    9.52
   0  -5  32   17.53   11.85
   0   5  33    9.36    9.94
   0  -5  33    8.89   11.57
   0   5  34    7.00    9.69
   0  -5  34   10.70   12.50
   0  -6   0   77.85    6.88
   0  -6   0   84.79    9.03
   0   6   0  103.21    9.33
   0   6   0   86.57    6.13
   0   6   1  139.06    9.61
   0  -6   1   99.58   10.04
   0   6   1  123.99    8.84
   0  -6   1  107.03    8.62
   0  -6  -1  113.03   10.53
   0   6  -1  118.80    7.93
   0  -6  -1  104.77    9.35
   0   6  -1  121.97   11.40
   0   6   2  118.59   12.87
   0  -6   2  100.82    8.48
   0   6   2  110.00    9.40
   0  -6   2   91.79    9.60
   0   6   2  104.46    8.39
   0  -6  -2   83.44    8.34
   0   6  -2  114.35   11.17
   0   6  -2  113.43    9.08
   0  -6  -2   93.34   10.30
   0  -6   3   32.08    5.43
   0   6   3   16.91    4.45
   0   6   3    4.77    6.51
   0   6   3   16.84    4.02
   0  -6  -3   19.11    4.19
   0   6  -3   25.14    6.50
   0  -6  -3   13.11    2.43
   0  -6  -3   18.14    4.68
   0   6  -3   22.27    3.52
   0   6   4  433.51   31.05
   0  -6   4  332.26   25.27
   0   6   4  357.67   33.69
   0   6   4  402.83   29.80
   0  -6  -4  334.10   31.19
   0  -6  -4  351.71   26.59
   0   6  -4  379.56   30.77
   0   6  -4  386.46   27.57
   0   6   5  225.88   15.16
   0  -6   5  248.05   17.55
   0   6   5  237.27   18.37
   0  -6  -5  209.16   11.29
   0   6  -5  256.10   17.61
   0   6  -5  249.60   20.40
   0  -6  -5  225.82   22.14
   0  -6  -5  244.79   17.10
   0   6   6   88.39    9.57
   0  -6   6  112.57    9.57
   0   6   6   82.96    8.16
   0  -6  -6   93.75   13.55
   0   6  -6   98.58    7.91
   0  -6  -6   90.02    6.75
   0   6  -6  109.35   10.26
   0  -6   7  114.41   10.64
   0   6   7  118.31    9.93
   0   6   7  118.90   10.15
   0  -6  -7  112.34   15.88
   0  -6  -7  127.84   12.86
   0   6  -7  110.59    9.19
   0  -6  -7  129.55   10.23
   0  -6   8  142.90   12.33
   0   6   8  153.15   10.35
   0   6   8  156.05   15.12
   0  -6  -8  116.70   14.28
   0  -6  -8  151.46   10.55
   0  -6  -8  167.76   15.06
   0   6  -8  151.00   13.58
   0   6   9    4.44    4.08
   0   6   9   14.52    5.30
   0  -6   9   15.88    4.38
   0   6   9    5.12    1.69
   0   6  -9    4.64    3.19
   0  -6  -9    0.56    5.45
   0  -6  -9    4.03    2.93
   0  -6  -9    7.43    7.35
   0   6  10   14.87    2.34
   0   6  10    6.84    3.39
   0  -6  10   20.78    4.87
   0   6  10    8.66    4.80
   0  -6 -10   17.61    5.78
   0  -6 -10    5.79    3.21
   0  -6 -10   18.58    8.66
   0   6 -10   11.39    3.62
   0  -6  11  154.59   15.93
   0   6  11  127.38   13.27
   0   6  11  139.80   12.36
   0   6 -11  122.77   11.06
   0  -6 -11  149.22   19.64
   0  -6 -11  144.96   10.98
   0  -6  12   45.24    7.03
   0   6  12   31.67    7.58
   0   6  12   34.97    4.13
   0   6  12   42.35    5.25
   0  -6 -12   41.30    6.27
   0   6  13   37.76    7.99
   0  -6  13   40.69    7.10
   0   6  13   46.32    7.22
   0   6  13   34.99    3.84
   0  -6 -13   38.40    5.48
   0   6  14  198.71   18.68
   0   6  14  176.42   12.33
   0  -6  14  178.91   17.54
   0   6  14  175.91   19.67
   0  -6 -14  160.15   14.22
   0   6  15  204.38   15.86
   0   6  15  235.79   18.88
   0  -6  15  212.31   21.52
   0   6  16   20.24    4.31
   0   6  16   20.61    5.01
   0  -6  16   19.16    6.87
   0   6  17   36.19    6.73
   0   6  17   36.41    6.01
   0  -6  17   33.11    8.12
   0  -6  18   29.10    7.99
   0   6  18   42.20    7.12
   0   6  18   42.92    6.84
   0   6  19   37.73    6.66
   0  -6  19   27.55    8.43
   0   6  19   21.98    6.44
   0   6  20   12.89    6.37
   0  -6  20   21.47    7.87
   0   6  20   24.26    6.27
   0   6  21   18.82    6.47
   0  -6  21    7.51    7.97
   0   6  21   11.73    8.28
   0   6  22   11.09    6.24
   0  -6  22    5.22    7.49
   0   6  22   14.48    6.59
   0   6  23   -5.44    6.17
   0  -6  23   -1.13    6.62
   0   6  23   -5.20    6.08
   0   6  24   74.47   13.83
   0   6  24   99.16   13.88
   0  -6  24   80.96   14.18
   0  -6  25    8.86    8.02
   0   6  25    2.98    8.29
   0   6  25   10.37    9.66
   0   6  26   23.90    9.45
   0  -6  26    6.64    9.16
   0   6  26   23.43    8.09
   0  -6  27    6.97    7.73
   0   6  27   -0.48    7.64
   0   6  27   -5.79    9.23
   0   6  28   -8.51    8.51
   0   6  28   -1.96    7.16
   0  -6  28    3.39    8.65
   0   6  29    1.63   10.02
   0  -6  29    7.66   12.22
   0   6  29    4.53    8.05
   0  -6  30   10.93    9.74
   0   6  30    1.09    8.81
   0   6  31    9.27   12.64
   0  -6  31   11.91   11.14
   0   6  32   -2.66    7.91
   0  -6  32   -0.14   10.09
   0  -6  33    1.57   12.63
   0   6  33   -9.30    9.20
   0   7   0   -1.25    2.19
   0   7   0    1.57    3.96
   0  -7   0    4.54    4.21
   0  -7   0    3.13    3.64
   0  -7   1   -1.45    3.98
   0   7   1   -2.16    2.97
   0  -7   1   -1.39    3.91
   0   7   1    0.25    3.70
   0   7  -1    1.94    4.32
   0  -7  -1   -0.15    4.27
   0  -7  -1   -4.44    3.62
   0   7  -1    0.73    2.21
   0   7   2    1.53    5.45
   0  -7   2   -2.65    3.06
   0   7   2   -0.65    2.70
   0   7   2    0.87    2.10
   0   7  -2    3.75    4.38
   0  -7  -2   -2.28    3.37
   0  -7  -2    3.68    3.49
   0   7  -2    5.36    3.25
   0   7   3   -0.72    3.06
   0  -7   3   -2.05    4.12
   0   7   3    2.04    3.66
   0   7   3   -4.79    5.21
   0  -7  -3   -0.66    1.58
   0   7  -3    0.13    3.32
   0   7  -3    1.14    3.51
   0  -7  -3   -1.68    5.09
   0  -7  -3   -0.71    2.35
   0   7   4   -2.47    2.62
   0   7   4    1.07    3.11
   0   7   4    1.42    5.37
   0  -7   4    0.25    3.11
   0  -7  -4    1.65    3.14
   0   7  -4   -5.05    3.91
   0  -7  -4   -0.63    1.54
   0   7  -4    4.16    2.58
   0  -7  -4   -7.47    4.98
   0   7   5   -4.13    3.27
   0   7   5   -3.68    3.36
   0   7   5   -1.51    5.38
   0  -7   5    0.36    4.61
   0  -7  -5   -1.50    2.93
   0   7  -5    2.75    5.23
   0   7  -5    4.02    2.60
   0  -7  -5   -0.01    1.21
   0  -7  -5    3.06    5.15
   0   7   6    1.87    3.64
   0  -7   6   -2.75    3.24
   0   7   6   -3.21    3.55
   0  -7  -6   -3.79    4.25
   0   7  -6   -4.30    4.27
   0   7  -6   -1.97    2.93
   0  -7  -6    0.81    3.11
   0   7  -6    3.13    2.82
   0  -7  -6   -1.09    0.97
   0   7   7   -0.71    2.64
   0  -7   7    2.84    4.90
   0   7   7    3.98    4.07
   0   7  -7    9.84    4.68
   0   7  -7   -1.18    4.05
   0  -7  -7   -4.27    4.80
   0  -7  -7    6.20    3.13
   0  -7   8    7.20    3.79
   0   7   8   -2.55    3.48
   0   7   8    0.16    3.40
   0  -7  -8    0.32    3.27
   0  -7  -8    1.12    4.95
   0   7  -8    2.51    3.77
   0   7  -8    3.74    4.53
   0   7   9    0.44    2.73
   0  -7   9    3.90    4.97
   0   7   9    1.15    3.43
   0  -7  -9   -1.76    4.84
   0  -7  -9    0.67    3.44
   0   7  -9    0.57    2.95
   0   7  10    3.87    5.09
   0   7  10   -1.49    2.77
   0  -7  10    1.11    5.51
   0  -7 -10   -1.16    2.65
   0  -7 -10   -0.58    4.88
   0   7 -10   -1.97    3.09
   0   7  11    1.05    5.28
   0   7  11    1.21    2.97
   0  -7  11    3.56    4.16
   0  -7 -11    9.79    5.61
   0  -7 -11    2.84    2.85
   0   7  12   -0.06    1.87
   0   7  12    2.76    4.14
   0   7  12    3.21    5.66
   0  -7  12    3.08    5.67
   0  -7 -12   -0.06    3.82
   0  -7 -12    5.77    7.39
   0   7  13   14.45    4.25
   0   7  13    1.70    6.54
   0   7  13    0.80    1.94
   0  -7  13   -0.46    4.62
   0  -7 -13   -2.78    4.16
   0  -7  14    2.11    4.74
   0   7  14   -3.05    6.44
   0   7  14   -1.19    2.15
   0   7  14   -1.97    4.53
   0  -7 -14    0.93    4.19
   0   7  15    1.23    2.35
   0   7  15   -1.73    3.68
   0  -7  15    5.79    6.40
   0   7  16    1.78    2.56
   0   7  16    4.22    5.32
   0  -7  16   -2.29    4.89
   0   7  17    2.41    4.55
   0  -7  17    3.48    5.53
   0   7  17    3.64    3.10
   0   7  18    2.71    4.35
   0   7  18   -0.60    2.99
   0  -7  18   -4.58    5.56
   0   7  19   -2.76    4.69
   0  -7  19   -2.19    8.09
   0   7  19   -0.87    4.47
   0  -7  20    2.75    6.09
   0   7  20   -3.89    4.87
   0   7  20   -1.46    5.03
   0   7  21   -3.54    7.49
   0   7  21   -2.27    4.75
   0  -7  21  -10.12    6.56
   0  -7  22   -2.32    6.73
   0   7  22   -3.11    5.25
   0   7  22   -2.22    4.97
   0  -7  23   -4.25    7.18
   0   7  23   -2.03    5.40
   0   7  23   -0.66    5.48
   0   7  24   -6.51    7.37
   0  -7  24    4.70    7.24
   0   7  24   -0.28    5.54
   0  -7  25   -5.37    8.08
   0   7  25    2.88    6.49
   0   7  25    9.06    6.33
   0  -7  26    5.09    8.20
   0   7  26   -4.51    8.80
   0   7  26    2.41    6.95
   0   7  27    1.09    6.94
   0  -7  27    9.18   11.29
   0  -7  28   15.21    8.41
   0   7  28   -8.41    9.98
   0   7  29   -6.74    7.60
   0  -7  29    1.06    9.04
   0  -7  30    4.74    8.63
   0   7  30   -2.46    6.89
   0   7  31    1.49   12.25
   0  -7  31   21.36   10.76
   0   7  32    0.32   12.27
   0  -7  32   15.80   11.41
   0  -7  33   -2.02   14.74
   0   7  33  -12.78    9.78
   0  -8   0  169.80   13.06
   0  -8   0  188.79   15.72
   0   8   0  179.20   15.29
   0   8   0  176.94   13.83
   0   8   1  337.14   26.51
   0  -8   1  307.08   23.32
   0  -8   1  322.05   24.26
   0   8   1  309.13   23.39
   0  -8  -1  317.94   23.20
   0  -8  -1  335.55   27.30
   0   8  -1  297.18   21.37
   0   8  -1  327.00   26.59
   0   8   2  110.05   16.40
   0  -8   2  124.53   11.48
   0   8   2  101.41   10.00
   0   8   2  108.37    8.69
   0  -8  -2  104.39    9.44
   0  -8  -2  103.62    9.08
   0   8  -2  124.26   11.71
   0   8  -2  103.08    8.16
   0   8   3  163.99   11.82
   0   8   3  172.77   12.86
   0   8   3  175.20   18.69
   0  -8   3  174.34   15.73
   0  -8  -3  173.19   11.11
   0  -8  -3  183.57   13.86
   0   8  -3  165.11   13.78
   0  -8  -3  165.74   16.29
   0   8  -3  174.74   15.57
   0  -8   4   68.64    7.12
   0   8   4   77.37    6.18
   0   8   4   80.20    8.26
   0  -8  -4   82.72   10.77
   0   8  -4   84.71    8.77
   0   8  -4   84.11    8.70
   0  -8  -4   75.80    6.38
   0   8   5  213.57   16.36
   0   8   5  190.27   14.97
   0  -8   5  189.52   15.16
   0   8   5  213.89   21.22
   0   8  -5  193.89   16.47
   0  -8  -5  216.69   16.01
   0   8  -5  181.31   16.31
   0  -8  -5  200.01   20.25
   0  -8   6  215.46   17.39
   0   8   6  184.75   16.38
   0   8   6  216.44   16.56
   0   8  -6  206.06   21.75
   0  -8  -6  202.97   14.89
   0   8  -6  190.70   15.57
   0  -8  -6  214.91   21.50
   0   8   7  310.24   25.88
   0   8   7  313.62   24.37
   0  -8   7  334.33   26.46
   0  -8  -7  310.18   27.80
   0   8  -7  316.72   28.18
   0   8  -7  287.28   23.58
   0  -8  -7  315.89   25.22
   0   8   8    2.07    3.13
   0  -8   8    8.99    5.51
   0   8   8   -0.31    3.76
   0  -8  -8   -1.00    3.68
   0   8  -8    3.63    3.04
   0   8  -8   -1.18    6.53
   0  -8  -8    0.08    4.96
   0   8   9  133.65   11.64
   0  -8   9  125.84   12.31
   0   8  -9  154.05   15.05
   0  -8  -9  136.32   17.13
   0   8  -9  102.90   10.03
   0  -8  -9  142.09   12.05
   0  -8  10  262.11   21.51
   0   8  10  241.15   20.70
   0   8  10  243.81   23.16
   0  -8 -10  208.94   22.30
   0  -8 -10  208.78   17.10
   0   8 -10  263.49   24.98
   0  -8  11   22.86    6.00
   0   8  11   24.96    5.43
   0   8  11   19.90    4.13
   0  -8 -11   37.13    6.85
   0  -8 -11   16.85    3.84
   0  -8  12   62.99   12.07
   0   8  12   82.42    9.43
   0   8  12   89.51   12.25
   0  -8 -12   74.61    7.28
   0  -8 -12   78.28   14.74
   0  -8  13  119.23   12.03
   0   8  13   97.77    8.46
   0   8  13   64.15    9.97
   0  -8 -13   71.17    9.59
   0  -8 -13   90.51   16.73
   0   8  14   52.20    4.10
   0  -8  14   46.12    8.88
   0   8  14   55.93    6.90
   0   8  15   27.57    6.83
   0  -8  15   13.75    6.79
   0   8  16   45.64    7.19
   0   8  16   57.13    4.98
   0  -8  16   44.21    9.27
   0   8  17   11.74    7.19
   0  -8  17   13.91    7.43
   0   8  17   14.96    3.71
   0   8  18   33.24    5.77
   0  -8  18   42.76    9.11
   0   8  18   52.25    7.60
   0  -8  19   34.63    9.23
   0   8  19   31.33    4.83
   0   8  19   20.87    7.15
   0  -8  20   17.90    8.45
   0   8  20   -2.43    3.49
   0   8  20    2.83    4.93
   0  -8  21   20.11    8.08
   0   8  21    6.25    5.76
   0   8  21    8.47    4.61
   0  -8  22    2.74    6.64
   0   8  22   -2.06    6.94
   0   8  22   -0.28    4.43
   0   8  23   14.82    8.62
   0   8  23    3.77    5.42
   0  -8  23   12.58    8.32
   0   8  24    0.71    5.26
   0   8  24   -2.95    5.33
   0  -8  24    3.75    7.15
   0  -8  25   -2.51    8.04
   0   8  25   10.53    8.43
   0   8  26    1.27    6.92
   0  -8  26    9.99    9.05
   0   8  27    1.79   10.69
   0  -8  27   22.15    9.87
   0  -8  28   22.88   10.00
   0   8  28    3.93    7.94
   0  -8  29   47.88   16.82
   0   8  29   15.34   13.73
   0  -8  30    8.62    9.64
   0   8  30    2.53    8.11
   0   8  31   -3.47   10.85
   0  -8  31   11.51   10.27
   0  -8  32    1.42   10.81
   0   8  32    8.35   11.98
   0  -9   0    0.84    4.02
   0  -9   0    0.77    3.22
   0   9   0   -3.03    3.15
   0   9   0    3.33    3.21
   0  -9   1   -1.25    3.14
   0  -9   1   -1.60    4.09
   0   9   1   -0.51    3.14
   0   9   1   -0.91    2.91
   0  -9  -1   -0.07    4.57
   0   9  -1   -0.45    3.37
   0  -9  -1    5.16    3.76
   0   9  -1   -3.00    4.02
   0   9   2   -0.71    4.16
   0   9   2   -1.16    3.19
   0   9   2    9.23    5.83
   0  -9   2    8.43    4.65
   0   9  -2    4.84    3.67
   0   9  -2    0.74    4.75
   0  -9  -2    9.34    5.01
   0  -9  -2   -1.10    3.85
   0  -9   3    1.93    3.01
   0   9   3   -0.33    5.56
   0   9   3    0.07    3.24
   0   9   3   -1.31    3.81
   0   9  -3    2.58    3.48
   0  -9  -3   -0.84    3.61
   0  -9  -3    1.86    2.22
   0  -9  -3    2.54    4.70
   0   9  -3    1.27    3.64
   0   9   4   -0.93    3.62
   0   9   4   -0.16    3.11
   0   9   4   -2.21    5.82
   0  -9   4   -2.99    4.43
   0  -9  -4    2.10    3.25
   0  -9  -4    1.59    5.53
   0   9  -4    2.53    3.59
   0   9  -4    1.25    3.65
   0  -9  -4   -0.64    1.87
   0  -9   5    1.96    3.25
   0   9   5   -0.03    5.53
   0   9   5   -0.18    3.64
   0   9   5   -0.24    3.39
   0  -9  -5   -0.60    5.63
   0  -9  -5    0.63    1.55
   0   9  -5    1.82    3.99
   0   9  -5   -0.05    2.73
   0  -9  -5   -0.07    3.50
   0   9   6    1.62    2.52
   0   9   6   -1.09    2.63
   0  -9   6    0.52    3.63
   0   9  -6    0.68    5.98
   0  -9  -6    4.65    3.34
   0   9  -6    1.60    4.13
   0  -9  -6   -6.32    5.91
   0  -9   7   -2.89    3.63
   0   9   7   -6.79    3.74
   0   9   7    0.26    3.82
   0   9  -7   -2.45    3.87
   0  -9  -7    6.41    5.01
   0   9  -7    3.09    5.90
   0  -9  -7   -1.25    3.73
   0  -9   8    3.57    5.00
   0   9   8    2.05    2.91
   0   9   8   -0.24    3.20
   0   9  -8    3.30    6.37
   0  -9  -8    7.59    5.10
   0  -9  -8    2.70    2.85
   0   9   9    0.90    4.32
   0  -9   9    0.44    3.94
   0   9   9    2.77    3.75
   0  -9  -9    2.34    2.70
   0   9  -9   -3.00    5.24
   0  -9  -9   -3.91    6.70
   0   9  10   -0.59    2.86
   0  -9  10   -2.45    4.01
   0   9  10    3.70    4.37
   0  -9 -10    4.21    7.17
   0   9 -10   -3.48    5.19
   0  -9 -10   -1.12    3.73
   0   9  11   -2.09    5.03
   0   9  11    0.83    3.85
   0  -9  11   -0.23    4.45
   0  -9 -11    1.26    7.26
   0  -9 -11    0.25    3.75
   0   9 -11    0.63    5.22
   0   9  12    2.17    5.42
   0   9  12   -1.41    4.06
   0  -9  12   -0.54    5.98
   0  -9 -12   -8.82    7.17
   0  -9 -12    2.15    3.96
   0   9 -12   -0.72    7.93
   0  -9  13    3.36    4.87
   0   9  13    3.55    4.68
   0  -9 -13    5.73    8.54
   0  -9 -13   -0.42    3.34
   0   9  14    8.74    5.17
   0  -9  14    1.68    5.58
   0  -9 -14    0.72    6.32
   0   9  15    0.41    0.76
   0   9  15   -3.44    4.72
   0  -9  15    1.43    5.00
   0   9  16    2.47    1.44
   0   9  16    3.12    4.08
   0  -9  16    4.62    5.58
   0  -9  17    6.64    5.46
   0   9  17   -0.88    2.06
   0   9  17    1.64    5.16
   0  -9  18    1.60    8.50
   0   9  18    0.38    2.54
   0   9  18   -6.04    4.30
   0  -9  19   -1.42    6.73
   0   9  19   -6.45    3.09
   0   9  19   -0.28    4.66
   0   9  20   -2.32    3.50
   0   9  20    2.73    6.71
   0  -9  20  -12.81    6.56
   0   9  21   -1.41    5.15
   0  -9  21   -2.87    6.59
   0   9  21   -3.44    3.22
   0  -9  22   -9.19    7.24
   0   9  22   -2.86    5.76
   0   9  23   14.98    6.24
   0  -9  23   -2.97    8.79
   0   9  24   21.24    7.69
   0  -9  24  -21.43    7.56
   0   9  25    1.11    8.33
   0  -9  25  -12.42    8.82
   0   9  26    0.59    6.48
   0  -9  26   -3.51    7.87
   0   9  27    2.84    9.13
   0  -9  27    2.64    8.90
   0  -9  28    0.90   10.43
   0   9  28   16.16    7.90
   0   9  29   16.73    9.57
   0  -9  29  -11.61    9.09
   0   9  30   12.70    8.85
   0  -9  30   12.96   11.21
   0   9  31   14.54   10.89
   0  -9  31   -7.86   10.10
   0 -10   0  312.38   24.38
   0 -10   0  294.49   27.30
   0  10   0  303.56   23.25
   0  10   0  282.57   23.69
   0 -10   1  150.82   14.76
   0  10   1  135.82   12.04
   0 -10   1  182.76   13.04
   0  10   1  137.27   13.45
   0 -10  -1  137.21   11.74
   0 -10  -1  127.10   11.24
   0  10  -1  121.80   11.17
   0  10  -1  150.77   12.70
   0  10   2   75.46    6.95
   0 -10   2  106.10   10.43
   0  10   2   98.61    9.82
   0  10   2   74.11   13.24
   0  10  -2   99.20   10.47
   0  10  -2   84.66    9.23
   0 -10  -2   99.24   10.12
   0 -10  -2  107.89   11.16
   0  10   3   16.88    9.69
   0 -10   3   17.50    4.60
   0  10   3   16.17    3.80
   0  10   3    8.01    3.85
   0  10  -3    8.65    4.33
   0 -10  -3   16.47    4.41
   0 -10  -3   11.41    4.61
   0 -10  -3    6.43    2.55
   0  10  -3   12.92    4.60
   0  10   4   36.57    5.73
   0  10   4   34.00    8.85
   0 -10   4   34.83    5.71
   0  10   4   51.07    7.01
   0 -10  -4   62.06    8.94
   0  10  -4   48.96    6.66
   0  10  -4   41.54    5.11
   0 -10  -4   34.16    3.25
   0 -10  -4   40.78    6.28
   0 -10   5   20.29    6.08
   0  10   5    7.56    4.02
   0  10   5   14.53    4.74
   0  10   5   10.14    7.05
   0 -10  -5    8.16    1.98
   0 -10  -5   16.81    6.63
   0 -10  -5   13.86    4.49
   0  10  -5   14.39    6.80
   0  10  -5    5.23    3.64
   0 -10   6    9.01    4.12
   0  10   6    6.57    2.99
   0  10   6    5.52    3.05
   0  10   6   -1.81    4.02
   0 -10  -6   10.68    6.40
   0 -10  -6    3.83    4.14
   0  10  -6   -1.54    4.32
   0 -10  -6    1.82    1.58
   0  10   7   62.04    7.23
   0 -10   7   53.25    7.23
   0  10   7   43.67    6.91
   0  10  -7   52.38    8.68
   0 -10  -7   37.03    6.89
   0 -10  -7   64.29   11.48
   0 -10   8  246.82   26.07
   0  10   8  269.03   22.07
   0  10   8  235.28   23.01
   0 -10  -8  275.49   29.19
   0  10  -8  257.28   29.91
   0 -10  -8  243.35   22.75
   0 -10   9   86.92    9.71
   0  10   9   57.26    7.32
   0  10   9   68.34    6.80
   0 -10  -9   58.44    7.12
   0  10  -9   89.66   11.02
   0 -10  -9   90.40   13.51
   0  10  10   29.69    4.66
   0 -10  10   20.86    5.98
   0  10  10   21.99    6.59
   0 -10 -10   17.60    5.65
   0 -10 -10   16.59    6.98
   0  10 -10   23.58    7.41
   0  10  11   91.89   12.22
   0  10  11   98.69    8.72
   0 -10  11  100.97   11.90
   0  10 -11  106.45   13.98
   0 -10 -11   86.64   10.89
   0 -10 -11  126.17   17.23
   0 -10  12   42.54    7.76
   0  10  12   50.95    7.39
   0  10 -12   53.64    9.98
   0 -10 -12   31.15   12.06
   0 -10 -12   27.08    6.93
   0 -10  13    4.20    4.72
   0  10  13   -3.78    4.37
   0  10 -13    3.81    6.57
   0 -10 -13   -7.90    7.93
   0 -10  14   69.08   13.26
   0  10  14   55.60    7.44
   0  10 -14   86.27   16.73
   0 -10 -14   58.57   15.14
   0  10  15   -1.38    5.31
   0 -10  15   -0.08    7.70
   0  10 -15   -1.54    9.36
   0  10  16   13.48    6.28
   0 -10  16    9.73    9.69
   0 -10  17   26.72   11.25
   0  10  17   24.93    6.15
   0 -10  18   16.74    7.80
   0  10  18    8.73    7.41
   0 -10  19   26.78    9.02
   0  10  19   17.77    8.50
   0 -10  20   38.07   10.80
   0  10  20   41.30    8.07
   0  10  21   24.55    7.55
   0 -10  21   26.30   10.59
   0 -10  22   28.13   10.11
   0  10  22   31.76    7.93
   0 -10  23  -11.53    8.81
   0  10  23  -11.90    8.69
   0 -10  24   -8.67   10.94
   0  10  24    6.35    7.74
   0 -10  25    9.10    9.51
   0  10  25    3.31    8.69
   0  10  26   10.82    7.05
   0 -10  26   21.17   10.89
   0 -10  27    8.28   10.14
   0  10  27   10.94   10.11
   0  10  28   18.31    8.88
   0 -10  28   30.46   12.13
   0  10  29   -9.90   10.90
   0 -10  29   -5.25   14.78
   0  10  30    2.14    8.60
   0 -10  30   18.91   14.97
   0  11   0    4.13    3.73
   0 -11   0   -1.92    4.60
   0 -11   0   -4.94    3.80
   0  11   0    4.46    3.56
   0 -11   1    1.00    3.55
   0  11   1   -2.77    3.46
   0  11   1   -1.01    3.47
   0 -11   1   -1.40    5.00
   0  11   1   -4.33    6.35
   0 -11  -1    0.89    4.57
   0  11  -1   -1.86    4.80
   0  11  -1   -0.67    3.75
   0 -11  -1   -1.54    5.08
   0  11   2   -2.40    4.36
   0  11   2    1.56    6.15
   0  11   2   -0.43    3.53
   0 -11   2   -3.18    3.64
   0 -11  -2   -3.48    5.51
   0 -11  -2   -0.07    1.89
   0  11  -2   12.51    5.12
   0 -11  -2    2.70    4.35
   0  11  -2    2.88    2.83
   0  11   3   -4.82    4.15
   0 -11   3   -3.35    3.72
   0  11   3   -2.54    5.93
   0  11   3    4.16    3.46
   0 -11  -3   -0.12    2.13
   0 -11  -3   -1.31    5.64
   0 -11  -3   -1.18    4.45
   0  11  -3   -0.06    3.78
   0  11  -3    0.00    2.97
   0 -11   4   -4.35    5.05
   0  11   4   -0.88    8.22
   0  11   4    0.24    3.72
   0  11   4    4.67    4.13
   0 -11  -4   10.33    6.17
   0 -11  -4    1.97    4.09
   0 -11  -4   -0.16    2.24
   0  11  -4   -0.30    5.40
   0  11   5    0.07    3.62
   0  11   5    0.16    6.37
   0 -11   5   -2.30    3.84
   0  11   5    6.21    4.12
   0 -11  -5   -3.90    3.84
   0 -11  -5    1.63    1.83
   0  11  -5   -2.33    4.21
   0 -11  -5   -2.66    5.79
   0 -11   6   -4.01    5.58
   0  11   6    1.39    4.18
   0  11   6   -3.96    3.72
   0  11   6    2.11    3.59
   0  11  -6    0.61    4.32
   0 -11  -6   -3.41    6.14
   0 -11  -6   -0.09    4.14
   0 -11   7   -0.35    4.06
   0  11   7   -0.48    4.13
   0  11   7   -4.88    3.12
   0 -11  -7   -5.24    6.35
   0  11  -7   -3.26    4.56
   0 -11  -7    0.39    0.85
   0 -11  -7   -3.61    4.00
   0  11   8   -0.01    4.35
   0 -11   8   -3.03    4.11
   0  11   8   -4.15    3.10
   0 -11  -8    3.61    4.11
   0  11  -8   -1.24    5.16
   0 -11  -8    0.38    7.24
   0  11   9    1.34    4.29
   0 -11   9   -4.16    4.24
   0  11   9   -0.97    4.35
   0 -11  -9    1.48    4.36
   0 -11  -9    6.52    6.97
   0  11  -9    1.51    5.45
   0  11  10    4.74    3.40
   0 -11  10    2.64    6.30
   0  11  10    0.44    4.18
   0  11 -10   -8.05    5.81
   0 -11 -10   -3.59    3.24
   0 -11 -10    0.10    7.35
   0  11  11   -4.00    4.52
   0 -11  11   -3.47    4.97
   0 -11 -11   -4.59    8.37
   0  11 -11   -0.08    6.16
   0 -11  12    1.92    5.06
   0  11  12    1.18    3.40
   0 -11 -12    3.68    8.45
   0  11 -12   -1.09    6.51
   0 -11  13   -4.91    7.10
   0  11  13   -0.61    4.90
   0  11 -13   -1.23    9.02
   0 -11 -13   -7.05    8.16
   0  11  14   -6.81    5.15
   0 -11  14   -8.04    5.67
   0 -11 -14    2.52    9.06
   0  11 -14    9.34    7.33
   0 -11  15    4.41    5.83
   0  11  15    0.49    5.15
   0 -11 -15   -6.01    6.90
   0  11 -15    9.61    7.68
   0 -11  16    7.16    6.12
   0  11  16    1.50    3.96
   0  11 -16   -5.53    7.58
   0 -11  17    0.80    6.29
   0  11  17   -2.30    5.55
   0  11 -17    6.49    7.99
   0  11  18   -3.36    4.47
   0 -11  18    5.20    6.54
   0  11 -18   14.36    7.92
   0 -11  19   -0.40    9.36
   0  11  19    8.65    6.46
   0  11 -19    5.63   12.24
   0  11  20    4.23    6.62
   0 -11  20    3.34    7.51
   0  11 -20    1.33    9.16
   0 -11  21    0.79    7.29
   0  11  21   -8.69    7.31
   0  11  22   -5.00    5.51
   0 -11  22    1.05    8.02
   0  11  23   -7.93    7.86
   0 -11  23   -1.13   11.62
   0 -11  24   -7.37    8.79
   0  11  24    9.73    7.80
   0  11  25   -7.68    8.54
   0 -11  25   -6.98    9.57
   0 -11  26   -0.48    8.78
   0  11  26   -2.45    6.11
   0 -11  27    8.26   10.45
   0  11  27    9.91    7.84
   0 -11  28   15.91   10.11
   0  11  28   -4.94   10.02
   0  11  29    8.81    8.25
   0 -11  29   11.40   11.09
   0 -12   0   58.73    7.81
   0  12   0   50.97    6.98
   0 -12   0   60.01    8.99
   0  12   0   49.24    7.32
   0  12   1   31.05    5.00
   0  12   1   53.71   10.87
   0  12   1   66.35    8.82
   0 -12   1   57.63    9.63
   0 -12  -1   50.74    9.28
   0 -12  -1   31.93    6.39
   0  12  -1   49.23    6.59
   0 -12   2   14.89    5.78
   0  12   2    3.62    4.18
   0  12   2    9.85    7.13
   0  12   2    6.38    4.31
   0 -12  -2    1.65    5.12
   0 -12  -2   15.27    6.17
   0  12  -2    9.72    4.40
   0 -12  -2    1.75    3.16
   0  12   3   14.30    5.10
   0 -12   3   19.35    5.42
   0  12   3   32.53    9.20
   0  12   3   17.00    6.20
   0 -12  -3   16.70    6.21
   0  12  -3   14.48    5.23
   0 -12  -3   20.02    3.93
   0 -12  -3   16.77    8.15
   0 -12   4   43.61    9.16
   0  12   4   33.93    6.36
   0  12   4   41.43   10.16
   0  12   4   45.17    5.89
   0 -12  -4   48.83    7.81
   0 -12  -4   28.30    4.12
   0 -12  -4   28.16    5.78
   0  12  -4   48.78    9.14
   0 -12   5   -1.87    3.93
   0  12   5    0.94    3.88
   0  12   5    7.85    4.56
   0  12   5    1.85    6.24
   0 -12  -5   -4.56    4.39
   0 -12  -5    0.05    6.21
   0 -12  -5   -0.08    1.66
   0  12  -5    1.90    4.30
   0 -12   6    8.50    5.29
   0  12   6   28.80    5.72
   0  12   6    8.84    4.91
   0 -12  -6    6.97    5.70
   0 -12  -6   13.82    5.31
   0 -12  -6    4.95    1.76
   0  12  -6   16.31    5.42
   0  12   7   93.07    9.63
   0  12   7   59.75    8.79
   0 -12   7   69.25    8.90
   0 -12  -7   76.18   12.98
   0  12  -7  100.90   13.65
   0 -12  -7   46.99    6.98
   0  12   8   35.65    7.37
   0  12   8   34.70    7.12
   0 -12   8   40.76   10.00
   0 -12  -8   27.61    7.30
   0 -12  -8   62.78   11.80
   0  12  -8   51.84    8.86
   0  12   9   54.50    8.00
   0 -12   9   37.91   10.82
   0  12  -9   44.86   12.84
   0 -12  -9   54.72   12.04
   0  12  10   77.42    9.55
   0 -12  10   78.27   11.35
   0  12 -10   65.46   12.28
   0 -12 -10   59.30   15.11
   0  12  11   27.13    6.69
   0 -12  11   38.72    7.66
   0 -12 -11   22.05   11.69
   0  12 -11   33.17    9.38
   0  12  12   25.03    4.68
   0 -12  12    0.90    9.12
   0 -12 -12   12.15   10.64
   0  12 -12   14.05   11.60
   0  12  13   48.51    8.44
   0 -12  13   29.26    9.38
   0  12 -13   24.51   11.71
   0 -12 -13   62.83   10.64
   0  12  14   24.03    6.71
   0 -12  14   12.98    9.41
   0 -12 -14    6.65    8.34
   0  12 -14   16.32   11.69
   0 -12  15   62.33   10.96
   0  12  15   57.93    9.00
   0 -12 -15   41.18   11.87
   0  12 -15   60.46   13.30
   0 -12  16   27.53    9.73
   0  12  16   41.34    6.53
   0  12 -16   49.29   12.91
   0  12  17    6.45    6.33
   0 -12  17    5.77    7.67
   0  12 -17   14.94    9.41
   0 -12  18   16.39    8.39
   0  12  18   16.33    5.61
   0  12 -18   10.58   10.59
   0  12  19   -0.14    7.17
   0 -12  19   12.26   10.07
   0  12 -19    9.25   13.32
   0 -12  20   25.86    9.93
   0  12  20   13.45    8.81
   0  12 -20   27.12   12.64
   0  12  21   24.70    7.24
   0 -12  21   29.96   14.07
   0  12 -21   33.69   14.14
   0  12  22   14.63    6.32
   0 -12  22   14.97    9.18
   0  12 -22  -10.16   11.99
   0  12  23    5.64    6.47
   0 -12  23   19.32   12.36
   0  12 -23  -14.46   15.81
   0  12  24   -0.37    6.44
   0 -12  24   20.16    9.51
   0  12 -24   10.61   11.97
   0 -12  25   -6.33    8.94
   0  12  25    6.28    7.95
   0  12 -25   -5.45   11.09
   0 -12  26   10.22   11.63
   0  12  26   19.00   10.38
   0  12 -26   11.32   14.99
   0 -12  27    8.42   10.03
   0  12  27    0.52    6.85
   0  12 -27   11.44   18.06
   0  12  28  -11.44    7.29
   0 -12  28    8.25   13.94
   0  12 -28   22.84   17.58
   0 -13   0    4.17    4.69
   0  13   0    2.61    4.21
   0  13   0    6.33   10.45
   0 -13   1    3.21    4.13
   0  13   1   -6.84    7.21
   0  13   1   -2.73    5.28
   0  13  -1    0.42    4.06
   0 -13  -1    1.51    4.35
   0 -13  -1   -0.64    2.37
   0  13   2    5.72    7.50
   0 -13   2   -0.50    6.13
   0  13   2    1.30    5.10
   0 -13  -2    1.12    6.01
   0  13  -2   -0.75    5.97
   0  13   3   -2.11    6.90
   0 -13   3    0.45    5.85
   0  13   3    1.74    4.96
   0 -13  -3   -0.96    6.71
   0 -13  -3   -2.87    3.06
   0  13  -3    1.46    4.46
   0 -13   4    5.90    5.80
   0  13   4    6.05    6.85
   0  13   4    1.62    3.65
   0 -13  -4   -2.29    6.77
   0 -13  -4   -2.35    2.68
   0  13  -4    5.81    6.06
   0 -13   5    4.83    4.48
   0  13   5    1.07    7.13
   0  13   5   -4.67    4.84
   0  13  -5    1.62    6.41
   0 -13  -5    0.57    2.00
   0 -13  -5    0.81    4.92
   0 -13   6   -5.21    6.40
   0  13   6    4.65    4.49
   0 -13  -6    0.47    1.46
   0 -13  -6   -0.05    7.34
   0  13  -6   -2.36    6.49
   0  13   7   -2.85    4.89
   0 -13   7    0.79    6.08
   0 -13  -7   11.18    7.08
   0  13  -7   -3.98    7.08
   0 -13   8    1.19    5.02
   0  13   8   -1.76    5.00
   0  13  -8   -2.15    5.69
   0 -13  -8   -2.12    8.53
   0 -13   9   -3.40    5.09
   0  13   9   -1.19    4.96
   0  13  -9   -0.26    6.00
   0 -13  -9    1.14    8.08
   0  13  10    0.95    4.62
   0 -13  10   -1.00    7.00
   0 -13 -10   -6.24    6.12
   0  13 -10    1.71    7.78
   0 -13  11  -11.16    5.58
   0  13  11   -1.23    5.07
   0 -13 -11   10.46    9.10
   0  13 -11   -8.54    6.92
   0 -13  12   17.27    5.86
   0  13  12   -3.99    5.33
   0 -13 -12    0.64    7.07
   0  13 -12   13.94    7.52
   0  13  13   -0.92    4.75
   0 -13  13   -1.07    7.59
   0  13 -13    9.37    9.11
   0 -13 -13   -1.31    9.16
   0 -13  14    3.74    5.82
   0  13  14   -3.68    4.92
   0 -13 -14   -1.97    8.69
   0  13 -14    2.72    7.31
   0  13  15   -2.83    5.68
   0 -13  15   -0.91    9.11
   0  13 -15  -13.10    8.63
   0 -13 -15   -6.55   10.13
   0  13  16    2.51    5.67
   0 -13  16    7.27    9.47
   0 -13 -16    2.17    4.70
   0  13 -16    3.45   11.40
   0 -13  17    3.60    8.69
   0  13  17   -3.22    4.46
   0  13 -17    5.62   11.05
   0 -13  18    2.14    9.85
   0  13  18   -2.01    6.11
   0  13 -18   23.13   12.51
   0 -13  19   -1.25    7.31
   0  13  19    8.69    6.31
   0  13 -19  -11.94    8.93
   0  13  20   -1.01    4.92
   0 -13  20    4.87    7.58
   0  13 -20   -4.97    9.83
   0 -13  21    5.39   11.13
   0  13  21  -10.92    7.25
   0  13 -21    1.11   14.63
   0  13  22   -0.86    7.78
   0 -13  22  -12.36    8.27
   0  13 -22   -1.96   11.30
   0  13  23   -0.11    8.37
   0 -13  23    9.69   11.94
   0  13 -23   20.45   15.75
   0  13  24   -3.49    8.31
   0 -13  24   -4.29    8.65
   0  13 -24   -2.81   12.42
   0  13  25    6.88    7.00
   0 -13  25   24.01   11.14
   0  13 -25    9.14   14.02
   0 -13  26   -1.51   14.30
   0  13  26    6.01    6.91
   0  13 -26   18.28   18.08
   0 -13  27  -13.29   10.27
   0  13 -27    9.82   13.03
   0 -14   0    3.18    5.55
   0  14   0    9.43    5.78
   0  14   0   -0.26    8.71
   0 -14   1   13.34    7.19
   0  14   1    0.58    4.77
   0  14   1    7.23    8.89
   0 -14  -1    1.76    4.22
   0  14  -1   22.70    8.90
   0  14  -1    7.70    6.76
   0 -14  -1   13.65    7.47
   0  14   2   50.87    6.78
   0 -14   2   33.27    9.93
   0  14   2   28.67   11.80
   0 -14  -2   49.98   10.30
   0  14  -2   40.53    7.02
   0 -14  -2   21.77    4.85
   0  14   3   56.87   13.09
   0  14   3   61.91    7.95
   0 -14   3   76.42   12.39
   0 -14  -3   42.30    5.83
   0  14  -3   90.92   12.22
   0 -14  -3   66.25   12.95
   0  14   4   17.21    5.88
   0  14   4   45.78   13.70
   0 -14   4   27.29    8.85
   0 -14  -4   26.51   10.67
   0  14  -4   22.49    9.30
   0 -14   5   75.29   10.94
   0  14   5   86.91    8.76
   0  14   5   55.24   14.11
   0  14  -5   72.66   13.50
   0 -14  -5   71.39   14.53
   0  14   6   34.76    6.39
   0 -14   6   65.99   11.71
   0 -14  -6   76.65   12.99
   0  14  -6   36.70   11.45
   0  14   7    6.64    5.97
   0 -14   7   14.79    6.14
   0 -14  -7   12.69    9.44
   0  14  -7   12.21    6.69
   0 -14   8   18.90    9.50
   0  14   8   30.82    7.12
   0  14  -8   15.91   11.16
   0 -14  -8   24.52   11.79
   0  14   9   11.50    5.87
   0 -14   9    6.62    6.31
   0 -14  -9   17.19    9.61
   0  14  -9    8.34    7.60
   0  14  10   19.81    5.08
   0 -14  10   16.27    7.39
   0 -14 -10   23.69   11.35
   0  14 -10   28.34    8.82
   0  14  11   10.53    6.54
   0 -14  11   11.18    6.92
   0  14 -11   34.06    8.48
   0 -14 -11   16.67   10.74
   0  14  12    4.61    4.98
   0 -14  12    3.33    6.05
   0  14 -12    1.83    9.90
   0 -14 -12   -4.77    9.63
   0  14  13   -0.76    4.08
   0 -14  13    4.51    6.18
   0 -14 -13   -1.19    8.85
   0  14 -13   -5.82    7.68
   0 -14  14   54.20   11.98
   0  14  14   55.60    7.82
   0  14 -14   65.24   14.71
   0 -14 -14   20.06   16.86
   0 -14  15   42.38   11.87
   0  14  15   42.28    7.46
   0  14 -15   32.91   13.38
   0 -14 -15   54.19   16.17
   0 -14  16   17.76    9.15
   0  14  16   11.40    7.57
   0  14 -16   22.23   11.39
   0 -14 -16   17.45    9.75
   0  14  17   18.48    7.34
   0 -14  17   11.13   11.51
   0  14 -17   11.97   11.90
   0  14  18   -1.90    4.90
   0 -14  18    2.30    7.51
   0  14 -18   16.76    9.40
   0 -14  19    5.18    9.08
   0  14  19   13.02    7.80
   0  14 -19    1.12   10.90
   0  14  20   -4.61    7.35
   0 -14  20    7.31    8.45
   0  14 -20    7.08   10.19
   0  14  21    1.68    7.07
   0 -14  21    8.55   11.21
   0  14 -21    0.91   14.68
   0 -14  22    0.31    8.68
   0  14  22    1.60    5.75
   0  14 -22   19.72   11.53
   0  14  23    0.41    5.59
   0 -14  23   -2.61    8.18
   0  14 -23    0.44   10.70
   0 -14  24   -2.82    9.83
   0  14 -24  -11.69   14.28
   0 -14  25   82.94   23.46
   0  14 -25   44.79   27.91
   0 -15   0   -7.39    5.31
   0  15   0   21.72   12.07
   0  15   0    1.68    6.10
   0 -15   1   15.56    7.87
   0  15   1    0.64    9.02
   0  15   1    2.07    6.29
   0  15  -1    2.42    9.62
   0  15  -1    3.30    6.68
   0 -15  -1    6.49    7.57
   0  15   2   -1.47    5.58
   0  15   2   -4.74    8.22
   0 -15   2   -2.51    6.78
   0  15  -2    9.26    8.45
   0  15  -2    3.67    6.37
   0 -15  -2   -2.83    7.42
   0  15   3   -3.06    6.05
   0 -15   3    4.34    5.77
   0  15   3   27.04    8.47
   0 -15  -3    3.87    6.28
   0  15  -3   -2.18    5.14
   0  15   4    1.57   11.23
   0  15   4   -0.05    4.09
   0 -15   4   -1.92    5.54
   0  15  -4   -2.23    5.09
   0 -15  -4    1.68    7.97
   0  15   5    2.25    4.07
   0  15   5    5.81    5.14
   0 -15   5   -5.34    4.89
   0  15  -5   -6.85    7.03
   0 -15  -5    1.71    7.58
   0  15   6    0.00    5.39
   0 -15   6    1.16    7.21
   0 -15  -6   -2.34    7.86
   0  15  -6    5.04    7.37
   0  15   7    4.85    5.38
   0 -15   7    1.61    5.45
   0  15  -7   -4.14    5.53
   0 -15  -7    7.41    8.37
   0 -15   8   -0.24    7.38
   0  15   8   -1.19    3.59
   0 -15  -8   -0.24    8.60
   0  15  -8    5.39    7.87
   0  15   9    0.16    5.05
   0 -15   9   -5.24    5.27
   0 -15  -9   14.09    8.86
   0  15  -9    8.21    8.68
   0  15  10   -0.70    5.25
   0 -15  10   -1.72    5.70
   0 -15 -10    2.39    6.92
   0  15 -10    5.93    6.19
   0  15  11   -0.21    5.39
   0 -15  11    3.35    8.49
   0 -15 -11   11.49   10.16
   0  15 -11   12.02    9.46
   0 -15  12    5.04    8.09
   0  15  12   -3.47    5.14
   0  15 -12   -0.73    9.55
   0 -15 -12    5.77    9.09
   0 -15  13    0.51    6.59
   0  15  13   -0.08    5.41
   0 -15 -13    4.49    9.93
   0  15 -13   -0.03    7.63
   0 -15  14   16.79    9.85
   0  15  14    6.30    5.96
   0 -15 -14    2.51   10.89
   0  15 -14    2.43   11.33
   0 -15  15   -2.90    7.18
   0  15  15   -0.41    5.80
   0  15 -15    2.04    8.93
   0 -15 -15  -18.81   10.85
   0 -15  16    5.89    7.25
   0  15  16    1.17    6.05
   0 -15 -16    6.44    7.63
   0  15 -16  -14.11    8.99
   0 -15  17   15.29    8.27
   0  15  17    1.59    5.18
   0  15 -17   24.44    9.84
   0  15  18    1.93    6.92
   0 -15  18    3.78    8.43
   0  15 -18   19.52   10.48
   0  15  19    9.72    5.18
   0 -15  19   -4.73    8.29
   0  15 -19   -4.12   10.62
   0 -15  20    4.93    8.80
   0  15 -20    1.28   10.83
   0 -15  21    5.90   11.86
   0  15 -21   -3.79   14.39
   0 -15  22   -1.17    8.95
   0  15 -22   11.17   11.71
   0 -15  23   -2.43    8.83
   0  15 -23    3.71   11.03
   0 -15  24    7.76   10.45
   0  15 -24   15.00   14.52
   0  16   0   31.20   10.03
   0  16   0   55.25   13.42
   0 -16   0   29.27   11.74
   0 -16   1    3.62    6.81
   0  16   1    7.70    7.46
   0  16   1   14.60   13.93
   0 -16  -1    6.45    8.57
   0  16  -1   10.61   10.68
   0  16  -1   10.34    5.57
   0 -16   2   22.09    9.12
   0  16   2    7.74    7.42
   0  16   2    7.55   10.41
   0  16  -2    8.90   15.34
   0  16  -2   15.33    6.12
   0 -16  -2    4.69    9.73
   0  16   3   23.32   12.74
   0  16   3   48.52    9.13
   0 -16   3   33.16   10.94
   0 -16  -3   23.52   12.35
   0  16  -3   26.53   14.83
   0  16  -3   24.71   10.16
   0  16   4   49.56   16.64
   0 -16   4   77.23   14.71
   0  16   4   70.96   11.29
   0 -16  -4   47.78   15.22
   0  16  -4   56.32   10.44
   0 -16   5   39.08    9.03
   0  16   5   40.64    6.60
   0 -16  -5   29.57   13.01
   0  16  -5   33.71    9.26
   0 -16   6   26.68   11.54
   0  16   6   30.36    8.06
   0 -16  -6   43.05   13.49
   0  16  -6   45.50   11.43
   0 -16   7   25.31    9.57
   0  16   7   31.78    8.56
   0 -16  -7   25.39   10.33
   0  16  -7   28.20    8.41
   0  16   8    3.40    5.67
   0 -16   8   -0.85    7.86
   0  16  -8  -13.85    8.68
   0 -16  -8    0.26    9.65
   0 -16   9    2.04    9.06
   0  16   9   -1.02    5.71
   0  16  -9    3.45    9.14
   0 -16  -9    9.16    7.45
   0 -16  10    4.11    9.26
   0  16  10   11.00    6.56
   0 -16 -10   13.13   11.24
   0  16 -10   16.45   10.77
   0  16  11    4.07    6.02
   0 -16  11    4.05    9.26
   0  16 -11   21.96   10.77
   0 -16 -11    9.03   11.00
   0  16  12    6.61    4.94
   0 -16  12   22.09    7.85
   0  16 -12   15.00    9.24
   0 -16 -12   27.47   11.83
   0 -16  13   26.63    8.79
   0  16  13   10.69    5.31
   0  16 -13   25.97   10.00
   0 -16 -13   10.12   12.38
   0 -16  14   10.93   10.53
   0 -16 -14    1.91   11.23
   0  16 -14    0.98    8.71
   0  16  15   20.51    8.37
   0 -16  15   19.91   12.23
   0  16 -15   20.69   14.95
   0 -16  16   20.32   10.46
   0  16 -16   27.30   12.24
   0 -16  17    4.27    8.58
   0  16 -17    4.78   10.14
   0  16 -17    0.23   10.76
   0 -16  18   15.75    9.68
   0  16 -18   12.47   11.77
   0 -16  19    3.77   10.02
   0  16 -19   25.44   12.63
   0 -16  20  -16.01    9.32
   0  16 -20    8.84   12.40
   0 -16  21    4.80   13.56
   0  16 -21    8.79   17.52
   0 -16  22    4.81   10.26
   0  16 -22    2.17   11.99
   0  17   0  -12.17   11.43
   0  17   0    9.89    8.40
   0 -17   0   18.35    9.61
   0 -17   1    2.13    9.16
   0  17   1    6.12   10.11
   0  17   1    5.46    7.26
   0  17  -1   -7.71   10.46
   0  17  -1    8.70    7.70
   0 -17  -1   -3.54    9.64
   0  17   2   -2.61    7.02
   0  17   2   12.13    9.55
   0 -17   2    8.22    9.10
   0  17  -2    1.56    7.85
   0  17  -2   -3.17   10.48
   0  17   3    2.19    7.23
   0 -17   3   23.92    9.31
   0  17   3   -9.46    9.80
   0  17  -3    8.14    8.54
   0 -17  -3    8.17   10.09
   0  17  -3   -7.23   11.80
   0  17   4   -0.17    4.90
   0 -17   4   -0.19    8.73
   0  17  -4   -6.78   11.58
   0  17  -4   -2.02    8.01
   0 -17  -4   -5.00    9.09
   0  17   5   -3.70    6.15
   0 -17   5    1.01    8.70
   0 -17  -5   -2.98    9.76
   0  17  -5    1.03    6.07
   0 -17   6    9.43    9.04
   0  17   6   -0.23    6.28
   0  17  -6  -18.19    8.51
   0 -17  -6   -9.01   10.70
   0  17   7   -0.10    6.25
   0 -17   7   12.89    7.30
   0  17  -7    5.13    7.00
   0 -17  -7    2.93    7.95
   0 -17   8   10.96    9.80
   0  17   8    6.56    6.36
   0  17  -8   -2.61   10.56
   0 -17  -8   25.87   11.73
   0  17   9   -1.83    5.59
   0 -17   9   11.77    8.67
   0 -17  -9   -8.57    9.98
   0  17  -9   -2.44    8.61
   0 -17  10   11.67    9.76
   0  17  10   -0.93    5.65
   0  17 -10    7.22    9.82
   0 -17  11    5.35   10.33
   0  17 -11   11.53   10.76
   0 -17  12    6.63    7.15
   0  17 -12    6.47    9.01
   0  17 -12    2.73    8.60
   0 -17  13   -4.17    9.87
   0  17 -13    2.40   11.09
   0 -17  14    1.33    8.14
   0  17 -14   11.57    9.34
   0 -17  15    6.32   11.21
   0  17 -15    7.12   12.66
   0 -17  16   -0.40    8.79
   0  17 -16   18.76   10.54
   0 -17  17    8.90    8.63
   0  17 -17  -12.09    9.11
   0 -17  18   18.15    9.89
   0  17 -18    1.38   11.50
   0 -17  19    6.32    9.29
   0  17 -19  -12.71   10.45
   0 -17  20    3.08    9.97
   0  17 -20    7.46   11.58
   0  18   0   19.32   10.39
   0  18   0   12.39   14.60
   0 -18   0   39.57   14.16
   0  18   1   49.21   16.19
   0 -18   1   26.28   14.74
   0  18   1   38.13    8.94
   0  18  -1   46.45   12.33
   0 -18  -1   34.91   14.83
   0  18  -1   29.08   17.46
   0 -18   2   31.72   12.80
   0  18   2   29.87   18.66
   0  18   2   11.35    7.59
   0  18  -2   27.04   11.08
   0 -18  -2   38.49   13.74
   0  18  -2   28.06   15.84
   0 -18   3   23.23    7.75
   0  18   3    2.45    6.85
   0  18   3    6.48    8.00
   0  18  -3    4.18    6.92
   0  18  -3    0.60   17.53
   0 -18  -3   19.89   11.12
   0  18   4    1.33    7.51
   0 -18   4    7.11    7.49
   0  18  -4    6.85    8.91
   0  18  -4    1.49   13.02
   0 -18   5   19.74   11.11
   0  18  -5   10.10   10.85
   0  18  -5   11.65   16.12
   0 -18   6    5.77    8.36
   0  18  -6   15.19   10.37
   0 -18   7    4.74   10.97
   0  18  -7   19.07    8.17
   0 -18   8   -0.71    9.24
   0  18  -8   -0.05    9.63
   0 -18   9    2.75    9.92
   0  18  -9    0.64    9.77
   0 -18  10    6.22   10.54
   0  18 -10    7.41   10.89
   0 -18  11   22.01   12.63
   0  18 -11   18.31   10.48
   0 -18  12    8.42    8.81
   0  18 -12    6.57    9.27
   0 -18  13   -4.81   10.97
   0  18 -13    7.16   11.41
   0 -18  14    4.90    8.57
   0  18 -14   13.09    9.99
   0 -18  15   17.22   11.31
   0  18 -15  -17.97   12.62
   0 -18  16    8.65   13.52
   0  18 -16   12.94   14.81
   0 -18  17    2.55    9.63
   0  18 -17    8.14   10.90
   0  19   0   20.32   14.79
   0  19   1   10.73   16.47
   0  19  -1    1.93   12.43
   0  19   2   11.10    8.02
   0  19  -2    8.99   18.64
   0  19  -2    2.48    9.53
   0 -19   3    5.12   10.31
   0  19  -3  -15.11    8.71
   0  19  -3   15.23   13.48
   0 -19   4   20.11    8.22
   0  19  -4    2.60   14.27
   0  19  -4   -2.86    7.23
   0 -19   5   12.22   11.22
   0  19  -5   13.16   10.58
   0  19  -5   -3.29   15.50
   0 -19   6   14.07    8.92
   0  19  -6    3.76    7.94
   0  19  -6   19.67   22.84
   0 -19   7    2.09   10.09
   0  19  -7   -7.59    7.61
   0  19  -7   27.72   20.98
   0 -19   8   -0.17   10.41
   0  19  -8   -0.85   10.16
   0 -19   9   17.60   10.86
   0  19  -9  -15.06   10.24
   0 -19  10   16.52   11.96
   0  19 -10    5.69   12.23
   0 -19  11   -1.39    8.53
   0  19 -11    8.32    8.41
   0 -19  12   13.51    9.39
   0  19 -12    2.62    9.45
   0 -19  13   -6.04   11.85
   0  19 -13    9.12   12.23
   0 -19  14   14.36    9.58
   0  19 -14    1.66   10.40
   0  20   0   25.85   18.83
   0  20   1   17.13   10.43
   0  20  -1   27.59   22.55
   0  20  -2   24.02   17.35
   0  20  -3    0.97   13.96
   0  20  -4   -6.40   16.23
   0  20  -5  -10.67   18.05
   0  20  -6   29.01   27.54
   0  20  -7   45.75   32.14
   0  20  -8   37.38   33.45
   0  20  -9   48.80   37.64
  -1   0  35   16.23   15.30
  -1   0  34    5.91    9.96
  -1   0  32    1.57    8.53
  -1   0  31   15.39   12.46
  -1   0  30   12.74   10.25
  -1   0  29    7.20    8.16
  -1   0  28   27.50   10.24
  -1   0  27   11.60   11.49
  -1   0  26    1.13    6.79
  -1   0  25   -0.03    6.27
  -1   0  24    6.44    7.02
  -1   0  23   -1.89    6.11
  -1   0  22   -0.93    5.59
  -1   0  21   12.95    8.10
  -1   0  20   38.60    8.15
  -1   0  19   53.45    8.62
  -1   0  18   14.15    5.92
  -1   0  17  143.35   14.46
  -1   0  16   53.49    7.95
   1   0 -15   -1.36    2.91
  -1   0  15   -0.76    4.00
   1   0 -14    7.90    3.38
  -1   0  14    1.88    4.63
   1   0 -13  317.35   27.61
  -1   0  13  368.05   29.05
   1   0 -12  165.24   12.52
  -1   0  12  163.67   16.42
   1   0 -11   89.94    7.45
  -1   0  11   87.80    9.32
   1   0 -10   48.51    5.14
  -1   0  10   49.22    8.78
   1   0  -9    3.03    2.67
  -1   0   9   -2.13    3.75
   1   0  -8  127.66    9.27
  -1   0   8  143.09   10.64
   1   0  -7   88.84    6.94
  -1   0   7  105.84    8.40
   1   0  -6  227.08   14.31
  -1   0   6  234.68   15.59
   1   0  -5  398.53   25.33
  -1   0   5  391.30   26.32
   1   0   4  421.40   29.46
  -1   0  -4  425.82   29.06
   1   0   5  247.74   17.88
  -1   0  -5  227.82   15.45
   1   0   6  106.42    9.54
  -1   0  -6  106.00    7.87
   1   0   7  148.98   12.25
  -1   0  -7  120.05   11.55
   1   0   8   -6.32    4.35
  -1   0  -8   -0.86    3.23
   1   0   9   42.62    7.16
  -1   0  -9   50.91    5.61
   1   0  10  124.51   11.03
  -1   0 -10  102.23    8.65
   1   0  11  182.86   17.93
  -1   0 -11  158.85   12.42
   1   0  12  377.96   30.14
  -1   0 -12  325.90   28.54
   1   0  13    6.76    4.55
  -1   0 -13    1.70    3.18
   1   0  14    2.42    4.35
  -1   0 -14   -0.88    2.98
   1   0  15   40.70    7.40
   1   0  16  148.47   15.09
   1   0  17    8.92    5.41
   1   0  18   47.19    8.19
   1   0  19   32.64   10.33
   1   0  20   10.35    6.47
   1   0  21    4.39    6.09
   1   0  22    3.18    6.11
   1   0  23    1.27    6.39
   1   0  24   14.61    7.84
   1   0  25    0.56    7.23
   1   0  26   14.00    8.77
   1   0  27    9.76    9.32
   1   0  28   -3.57    7.69
   1   0  29   29.18   11.51
   1   0  30    4.49    8.58
   1   0  31    7.47    9.15
   1   0  32    0.62    8.30
   1   0  33    3.92   12.60
   1   0  34  -21.92   15.76
  -1   1  35   14.21   12.80
  -1  -1  35   -6.82    9.73
  -1   1  34    9.04   10.67
  -1   1  34    3.36    9.70
  -1  -1  34    5.48   13.53
  -1   1  33   -3.59    8.96
  -1  -1  33   12.72    9.28
  -1   1  32   13.19   12.71
  -1  -1  32    7.63   10.23
  -1  -1  31   -2.10    8.41
  -1   1  31   -0.07    8.33
  -1   1  30   -3.08    8.23
  -1  -1  30   15.44    8.64
  -1  -1  29    7.73    8.54
  -1   1  29   11.95    8.85
  -1  -1  28    8.72    8.19
  -1   1  28   -0.45    7.16
  -1  -1  27   11.66    8.12
  -1   1  27    9.23    8.08
  -1  -1  26  -15.37    7.84
  -1   1  26    2.36   10.25
  -1  -1  25   -2.00    9.30
  -1   1  25    6.18    6.64
  -1  -1  24    5.63    7.43
  -1   1  24   14.20    7.05
  -1   1  23    1.25    5.98
  -1  -1  23   -3.35    5.85
  -1  -1  22   67.48   11.40
  -1   1  22   68.15   13.67
  -1  -1  21   52.67    9.16
  -1   1  21   52.32    8.83
  -1   1  20    4.19    5.33
  -1  -1  20    2.80    5.49
  -1  -1  19   38.88    9.90
  -1   1  19   33.69    7.24
  -1   1  18  113.00   11.97
  -1  -1  18  112.85   13.16
  -1   1  17   11.87    5.00
  -1  -1  17   16.85    5.71
  -1   1  16   94.38   10.60
  -1  -1  16   95.94   10.37
   1  -1 -15   56.78    6.49
   1   1 -15   46.89    6.22
  -1   1  15   65.35    8.29
  -1  -1  15   55.56   10.26
   1  -1 -14    6.33    3.11
   1   1 -14    5.93    3.39
  -1   1  14   12.73    6.18
  -1  -1  14   12.67    4.81
   1   1 -13   14.32    3.63
   1  -1 -13   10.97    3.57
  -1  -1  13   24.01    6.90
  -1   1  13   23.56    4.83
   1   1 -12   32.55    4.77
   1  -1 -12   33.05    5.79
  -1   1  12   40.29    5.88
  -1  -1  12   44.20    6.48
   1   1 -11   24.30    4.14
   1  -1 -11   23.22    4.07
  -1   1  11   22.14    7.26
  -1  -1  11   36.05    5.83
   1   1 -10   32.01    5.86
   1  -1 -10   29.08    3.90
  -1  -1  10   27.91    5.32
  -1   1  10    5.00    4.99
   1   1  -9   15.41    3.63
   1  -1  -9   14.07    3.44
  -1   1   9    9.67    5.87
  -1  -1   9   15.05    6.58
   1   1  -8  126.72    9.83
   1  -1  -8  148.26    9.89
  -1  -1   8  148.62   12.07
  -1   1   8  139.04   10.74
   1  -1  -7   17.70    3.17
   1   1  -7   19.94    3.70
  -1   1   7   17.32    5.41
  -1  -1   7   11.42    4.45
   1  -1  -6  176.55   10.65
   1   1  -6  163.69   10.94
  -1  -1   6  194.82   13.46
  -1   1   6  168.70   13.09
   1   1  -5    6.58    2.68
   1  -1  -5    3.31    2.02
  -1  -1   5    2.96    3.10
  -1   1   5    8.25    2.59
  -1   1   5    4.58    3.22
  -1  -1   5    6.35    3.13
   1   1  -4  101.11    6.58
   1  -1  -4  103.25    6.12
   1   1  -4   99.17    7.87
   1  -1  -4  107.81    5.89
  -1  -1   4  108.69    7.28
  -1   1   4   96.81    7.22
   1   1   3   96.39    7.10
   1   1   3   96.84    9.41
   1  -1   3  105.84    6.64
  -1  -1  -3  110.09    7.06
  -1  -1  -3  113.96   10.78
  -1  -1  -3  119.61    7.03
  -1   1  -3  104.32    6.58
   1   1   4    6.96    3.12
   1  -1   4    5.66    3.01
   1   1   4    4.33    4.79
  -1  -1  -4   -1.22    5.66
  -1  -1  -4    7.50    2.72
  -1   1  -4    3.16    2.66
   1  -1   5  163.92   11.91
   1   1   5  181.01   16.09
   1   1   5  159.23   12.24
  -1  -1  -5  194.66   12.10
  -1   1  -5  149.31   11.01
   1  -1   6   19.00    4.39
   1   1   6   13.93    6.39
   1   1   6   17.38    4.51
  -1  -1  -6   17.53    3.60
  -1   1  -6   16.25    3.62
   1   1   7  116.10   18.32
   1   1   7  137.80   11.70
   1  -1   7  139.66   11.78
  -1  -1  -7  144.26   10.09
  -1   1  -7  128.29   10.05
   1   1   8    5.01    6.80
   1   1   8   10.96    4.81
   1  -1   8    8.62    4.61
  -1   1  -8   13.01    3.88
  -1  -1  -8   21.53    3.74
   1  -1   9   21.63    5.42
   1   1   9   24.29    5.80
   1   1   9   26.41    7.23
  -1   1  -9   25.55    4.62
  -1  -1  -9   28.60    4.36
   1   1  10   22.17    7.28
   1  -1  10   27.96    5.51
   1   1  10   27.87    5.94
  -1  -1 -10   17.54    4.14
  -1   1 -10   23.72    4.03
   1  -1  11   32.93    6.29
   1   1  11   41.37    6.49
   1   1  11   44.25    8.05
  -1   1 -11   31.03    4.85
  -1  -1 -11   33.02    4.82
   1   1  12   15.56    6.67
   1   1  12   22.07    5.52
   1  -1  12   27.17    5.72
  -1  -1 -12   16.30    4.00
  -1   1 -12   18.77    3.98
   1   1  13    4.07    6.29
   1   1  13    6.62    4.52
   1  -1  13   10.21    5.34
  -1  -1 -13   10.99    3.44
  -1   1 -13    4.19    3.51
   1  -1  14   69.47    9.06
   1   1  14   52.14   10.37
   1   1  14   57.75    7.75
  -1  -1 -14   52.34    6.17
   1  -1  15   89.05   10.86
   1   1  15   81.88    9.62
   1  -1  16   20.78    6.35
   1   1  16   15.97    6.08
   1  -1  17  134.19   13.68
   1   1  17  116.92   13.10
   1  -1  18   33.70    7.40
   1   1  18   43.45    7.74
   1   1  19    0.34    5.58
   1  -1  19    5.25    5.71
   1   1  20   64.35   12.06
   1  -1  20   44.37   12.48
   1   1  21   65.74   14.55
   1  -1  21   85.70   12.35
   1  -1  22   -0.61    6.56
   1   1  22    3.09    6.25
   1   1  23    2.03    7.00
   1  -1  23   12.64    7.08
   1  -1  24    7.93    7.50
   1   1  24   10.26    7.20
   1   1  25    1.59    6.86
   1  -1  25    2.28    7.40
   1  -1  26   13.08   10.70
   1   1  26    2.46    7.85
   1  -1  27    4.50    7.74
   1   1  27   10.10    7.90
   1   1  28    7.30    7.86
   1  -1  28   -0.81    8.41
   1  -1  29   10.87    9.12
   1   1  29    1.51    8.70
   1   1  30    2.98    8.15
   1  -1  30    3.87    8.76
   1  -1  31   11.53   10.67
   1   1  31   30.63   11.03
   1   1  32    3.73    8.77
   1  -1  32  -10.63   11.80
   1  -1  33   -1.82   10.56
   1   1  33   23.58   10.91
   1   1  34   -6.49   10.38
   1  -1  34   -5.82   10.73
  -1   2  35    8.26   10.25
  -1   2  35   23.31   12.59
  -1  -2  35   -1.81    6.64
  -1  -2  35    6.55   11.95
  -1   2  34   -4.64    9.35
  -1  -2  34    1.66   10.47
  -1  -2  34   -5.53    9.52
  -1   2  34   20.01   12.07
  -1   2  33   -7.79   10.99
  -1  -2  33    6.09   13.57
  -1   2  33   16.58    9.10
  -1   2  32   33.78   18.81
  -1   2  32   19.62   10.35
  -1  -2  32   16.17   11.05
  -1  -2  31   16.18    8.90
  -1   2  31  -16.03    7.91
  -1   2  30    8.65    8.45
  -1  -2  30    9.40   12.99
  -1  -2  29   15.61   10.80
  -1   2  29   32.30   10.59
  -1  -2  28    2.07   10.93
  -1   2  28   13.46    7.80
  -1  -2  27    4.41    7.28
  -1   2  27    0.21    6.96
  -1   2  26   10.15   10.62
  -1  -2  26   20.80   11.52
  -1  -2  25   15.50    7.99
  -1   2  25   12.13    9.86
  -1  -2  24    1.37    9.71
  -1   2  24   17.06    6.94
  -1   2  23   18.34    7.57
  -1  -2  23   34.37    8.23
  -1  -2  22    6.46    6.18
  -1   2  22    2.31    5.71
  -1   2  21    7.77    5.58
  -1  -2  21    3.77    6.40
  -1  -2  20   24.43    7.98
  -1   2  20   52.19    7.90
  -1   2  19   36.17    7.41
  -1  -2  19   44.42    7.94
  -1   2  18  125.95   13.41
  -1  -2  18  121.18   13.66
  -1  -2  17   68.20   11.41
  -1   2  17   59.75    8.02
   1  -2 -16   34.03    5.02
  -1   2  16   42.62    6.84
  -1  -2  16   40.09    9.42
   1  -2 -15   22.45    6.21
  -1  -2  15   41.43    6.61
  -1   2  15   34.71    5.95
   1  -2 -14   43.28    5.37
   1   2 -14   38.19    5.67
  -1   2  14   53.11    6.94
  -1  -2  14   57.60    7.27
   1   2 -13   47.97    6.00
   1  -2 -13   61.56    5.96
  -1  -2  13   52.35    7.59
  -1   2  13   53.68    6.72
   1  -2 -12   56.95    7.02
   1   2 -12   41.20    5.57
  -1  -2  12   62.10    7.24
  -1   2  12   51.50    6.63
   1   2 -11  115.66   11.47
   1  -2 -11  131.05   11.49
  -1   2  11  146.29   11.42
  -1  -2  11  120.78   11.53
   1   2 -10   26.66    4.36
   1  -2 -10   24.78    5.01
  -1  -2  10   21.43    5.17
  -1   2  10   21.23    6.20
   1  -2  -9   16.32    4.50
   1   2  -9    8.47    3.75
  -1   2   9   14.24    3.73
  -1  -2   9   18.46    5.00
   1   2  -8   15.67    3.72
   1  -2  -8   11.08    3.06
  -1   2   8   10.79    3.41
  -1   2   8   16.45    5.08
  -1  -2   8   12.00    4.52
   1   2  -7  102.24    8.18
   1  -2  -7   95.28    6.72
  -1   2   7   98.59    6.93
  -1  -2   7   80.41    8.65
  -1   2   7  106.95    9.80
   1   2  -6   33.57    4.82
   1  -2  -6   34.73    4.56
  -1  -2   6   28.35    5.50
  -1   2   6   35.13    5.15
  -1   2   6   38.63    3.95
   1   2  -5  331.62   25.21
   1   2  -5  338.33   25.81
   1  -2  -5  424.51   27.40
   1  -2  -5  442.90   28.37
  -1   2   5  450.71   30.05
  -1   2   5  433.68   34.77
  -1  -2   5  431.55   30.81
  -1   2   5  478.00   31.35
   1  -2  -4   86.83    5.92
   1  -2  -4   86.34    5.15
   1   2  -4   91.93    6.77
  -1   2   4   85.98    6.44
  -1  -2   4   78.65    7.00
  -1   2   4   76.71    7.51
  -1   2   4   87.89    5.73
   1   2  -3  157.70   11.86
   1  -2  -3  167.93    9.63
   1  -2  -3  158.76   10.39
   1  -2  -3  156.90    7.60
   1   2  -3  169.26   10.42
  -1  -2   3  163.49   10.47
  -1   2   3  158.03    7.73
  -1   2   3  172.23    9.94
  -1   2   3  161.66   10.81
   1   2  -2   21.45    3.57
   1   2  -2   13.85    2.86
   1  -2  -2   17.97    2.62
  -1  -2   2   21.29    3.65
  -1  -2   2   19.95    3.06
   1   2   1   19.70    2.88
   1  -2   1   17.76    2.49
   1   2   1   13.72    3.05
  -1  -2  -1   18.08    3.86
  -1  -2  -1   19.84    2.66
   1   2   2  152.23    6.40
   1  -2   2  157.62    8.76
   1   2   2  166.84   12.13
   1   2   2  149.37    9.59
   1   2   2  163.57   11.76
  -1  -2  -2  155.58    9.49
  -1   2  -2  159.71    8.59
  -1  -2  -2  152.44   12.06
   1   2   3   81.37    6.39
   1   2   3   93.24    8.39
   1  -2   3   87.33    6.09
   1   2   3   80.45    7.77
  -1   2  -3   77.46    5.53
  -1  -2  -3   80.20    5.85
  -1  -2  -3   90.65    9.56
  -1  -2  -3   81.66    7.49
   1  -2   4  423.27   30.17
   1   2   4  456.14   37.87
   1   2   4  446.61   31.95
  -1  -2  -4  428.68   35.87
  -1  -2  -4  415.33   37.61
  -1   2  -4  455.19   31.37
  -1  -2  -4  436.32   29.94
   1   2   5   29.21    7.05
   1  -2   5   29.86    4.69
   1   2   5   31.42    4.84
  -1  -2  -5   44.96    8.29
  -1  -2  -5   32.79    5.74
  -1   2  -5   26.18    4.13
   1   2   6  107.56    8.95
   1   2   6  106.06   11.53
   1  -2   6   88.22    8.74
  -1  -2  -6   99.40    7.68
  -1   2  -6   95.50    7.71
  -1  -2  -6  108.12   14.11
   1  -2   7   14.17    4.39
   1   2   7   14.23    6.62
   1   2   7   20.48    4.50
  -1   2  -7   16.04    3.73
  -1  -2  -7    4.77    4.70
  -1  -2  -7   11.73    3.55
   1   2   8   13.49    4.54
   1  -2   8   12.01    4.75
   1   2   8   11.60    8.52
  -1   2  -8   10.79    3.70
  -1  -2  -8    9.63    4.87
   1   2   9   24.74    7.10
   1   2   9   25.31    5.11
   1  -2   9   17.31    5.35
  -1   2  -9   26.85    4.11
  -1  -2  -9   22.95    3.88
   1   2  10  115.45   13.81
   1  -2  10  107.78   10.94
   1   2  10  126.89   10.87
  -1  -2 -10  132.06   11.79
  -1   2 -10  121.50   11.95
   1  -2  11   47.27    7.18
   1   2  11   37.82    8.89
   1   2  11   52.20    6.65
  -1   2 -11   43.55    5.78
  -1  -2 -11   61.80    5.65
   1   2  12   51.02    9.49
   1  -2  12   86.89    8.29
   1   2  12   51.42    7.68
  -1  -2 -12   55.80    5.95
  -1   2 -12   56.30    6.21
   1  -2  13   65.25    7.36
   1   2  13   65.81    7.55
   1   2  13   47.25   12.34
  -1   2 -13   45.42    6.22
  -1  -2 -13   46.09    7.68
   1   2  14   28.17    6.38
   1  -2  14   34.11    6.31
   1   2  14   21.84    7.80
  -1  -2 -14   21.05    4.78
   1   2  15   35.95    7.20
   1  -2  15   47.86    8.49
   1   2  16   38.07    7.10
   1  -2  16   36.93    7.78
   1   2  17  125.54   15.25
   1  -2  17  107.79   13.17
   1  -2  18   14.20    6.54
   1   2  18   25.63    6.10
   1  -2  19   27.61    8.23
   1   2  19   30.86    7.50
   1  -2  20    6.24    6.51
   1   2  20   10.25    7.93
   1   2  21    5.90    6.10
   1  -2  21    6.07    6.24
   1   2  22    8.74    7.32
   1  -2  22    5.85    7.20
   1   2  23   12.13    6.86
   1  -2  23    1.11    6.97
   1   2  24    8.89    9.71
   1  -2  24    9.44    8.15
   1  -2  25   10.07    8.30
   1   2  25   11.79    7.53
   1   2  26   10.43    7.47
   1  -2  26   -5.22    7.79
   1   2  27    4.56    7.66
   1  -2  27    9.87    8.51
   1  -2  28   39.18   11.04
   1   2  28   16.04   10.05
   1  -2  29    4.74    8.15
   1   2  29   -3.12    7.68
   1   2  30    9.08    9.10
   1  -2  30    8.91    9.65
   1   2  31   28.81    9.76
   1  -2  31   -2.81   10.06
   1   2  32   -6.55    8.56
   1  -2  32    8.19   12.34
   1  -2  33   -4.25   11.18
   1   2  33   30.07   10.55
   1  -2  34   12.67   11.12
   1   2  34    7.25   10.75
  -1   3  35    6.14    8.63
  -1  -3  35  -10.50   10.99
  -1   3  35   -3.50   12.58
  -1  -3  34  -16.26   10.70
  -1   3  34    9.15   12.08
  -1   3  34    8.78    9.02
  -1   3  33   -1.78    9.50
  -1   3  33   -0.03    8.16
  -1  -3  33   13.71   13.84
  -1  -3  33   -3.56    5.39
  -1  -3  32    9.64   10.31
  -1   3  32   -1.79    8.60
  -1  -3  32    5.04    5.70
  -1   3  32    2.72   11.24
  -1  -3  31   10.53    8.71
  -1   3  31    4.47   15.69
  -1   3  31   -4.34    8.02
  -1  -3  31   -1.24    9.78
  -1  -3  30   12.95   10.22
  -1   3  30    3.86    8.92
  -1  -3  30   21.66    9.29
  -1   3  30    2.40   18.37
  -1   3  29    5.93   13.50
  -1  -3  29   -0.32    8.78
  -1   3  29   15.14    7.82
  -1   3  28   -0.19    9.55
  -1  -3  28   -0.85    7.99
  -1   3  28  -11.63   11.82
  -1  -3  27    2.54    7.49
  -1   3  27   -0.59    9.07
  -1  -3  26   13.59    8.07
  -1   3  26    7.79   10.28
  -1   3  25    4.16    8.29
  -1  -3  25   -1.51    6.88
  -1   3  24   43.86   11.37
  -1  -3  24   25.66    9.12
  -1  -3  23   17.92    8.92
  -1   3  23   32.88   10.04
  -1   3  22   20.37    7.65
  -1  -3  22   35.50   11.16
  -1   3  21   26.94    7.59
  -1  -3  21   34.08    8.44
  -1   3  20    8.56    5.71
  -1  -3  20    4.07    6.30
  -1   3  19  143.44   15.20
  -1  -3  19  132.20   15.83
  -1   3  18   29.28    6.37
  -1  -3  18   33.45    7.82
  -1   3  17    3.46    4.19
  -1  -3  17   -0.06    5.01
   1  -3 -16   61.65    6.93
  -1  -3  16   69.72   10.00
  -1   3  16   73.13   11.45
  -1   3  16   90.30   10.75
   1  -3 -15   39.42    6.65
  -1   3  15   45.37    8.78
  -1   3  15   45.24    6.70
  -1  -3  15   54.11    7.75
   1  -3 -14   36.28    5.81
  -1   3  14   22.03    7.55
  -1   3  14   37.48    5.45
  -1  -3  14   40.38    6.69
   1  -3 -13   17.53    3.60
   1   3 -13   15.64    4.38
  -1   3  13   26.50    6.63
  -1  -3  13   17.63    5.69
  -1   3  13   17.37    4.55
   1   3 -12   39.01    5.47
   1  -3 -12   44.47    4.67
  -1   3  12   49.11    5.22
  -1   3  12   48.13    7.94
  -1   3  12   59.13    6.05
  -1  -3  12   53.29    7.49
   1   3 -11   61.25    6.76
   1  -3 -11   56.68    5.50
  -1  -3  11   65.49   11.02
  -1   3  11   62.45    7.29
  -1   3  11   71.00    6.86
  -1   3  11   82.41    9.31
   1   3 -10   21.13    4.17
   1  -3 -10   26.04    3.56
  -1   3  10   35.59    6.27
  -1   3  10   23.19    3.68
  -1  -3  10   28.27    5.59
  -1   3  10   29.44    4.31
  -1  -3  10   17.17    3.44
   1  -3  -9   27.18    3.58
   1   3  -9   34.02    6.39
  -1   3   9   33.62    5.86
  -1  -3   9   32.57    5.75
  -1   3   9   26.11    6.07
  -1   3   9   29.13    4.72
   1   3  -8   26.78    4.79
   1  -3  -8   28.66    3.50
  -1   3   8   25.82    4.56
  -1   3   8   35.79    7.82
  -1   3   8   34.21    4.16
  -1  -3   8   27.97    5.72
   1  -3  -7   -1.41    2.10
   1   3  -7    1.70    3.18
  -1   3   7    0.64    2.64
  -1  -3   7   -2.15    3.73
  -1   3   7    4.27    3.35
  -1   3   7    0.28    4.79
   1  -3  -6  116.28    7.93
   1   3  -6   77.66    9.83
   1  -3  -6  122.41    7.25
  -1   3   6  101.50    7.61
  -1  -3   6  110.73    9.24
  -1   3   6  103.32   11.28
  -1   3   6   97.10    8.24
   1  -3  -5   12.17    2.88
   1   3  -5   20.36    3.91
   1  -3  -5   10.01    5.66
   1  -3  -5   10.35    2.90
  -1  -3   5   15.88    4.22
  -1   3   5   12.41    3.26
  -1   3   5   11.04    4.81
  -1   3   5   12.38    3.06
   1   3  -4  261.47   17.76
   1  -3  -4  254.35   19.52
   1  -3  -4  250.75   14.67
   1  -3  -4  263.89   15.74
   1   3  -4  270.68   20.91
  -1   3   4  257.09   15.55
  -1  -3   4  268.77   18.77
  -1   3   4  259.51   15.28
  -1   3   4  248.72   17.30
   1   3  -3   40.34    5.61
   1  -3  -3   31.41    4.37
   1   3  -3   32.72    5.47
   1  -3  -3   44.66    5.68
   1  -3  -3   32.06    3.39
   1  -3  -3   34.31    3.43
  -1   3   3   29.22    3.52
  -1   3   3   26.72    3.34
  -1  -3   3   35.06    4.75
  -1  -3   3   43.87    7.18
   1  -3  -2  185.44   13.90
   1  -3  -2  183.12   10.94
   1  -3  -2  178.57   10.13
   1  -3  -2  180.86   10.67
   1   3  -2  199.29   14.18
   1   3  -2  216.13   13.29
  -1  -3   2  195.23   13.17
  -1   3   2  191.51   10.85
  -1   3   2  173.00    9.26
  -1  -3   2  214.78   14.50
  -1   3   2  191.82   10.75
   1  -3  -1  640.05   46.61
   1   3  -1  559.69   43.70
   1  -3  -1  564.60   38.50
   1   3  -1  554.45   46.08
   1  -3  -1  545.35   37.00
  -1  -3   1  565.89   46.32
  -1  -3   1  558.84   46.16
  -1   3   1  567.36   39.80
  -1   3   1  612.85   47.79
   1   3   0  598.60   43.47
   1  -3   0  523.62   35.73
   1   3   0  566.42   42.64
  -1   3   0  556.50   37.65
  -1   3   0  530.60   37.78
  -1  -3   0  603.14   44.05
  -1  -3   0  563.51   42.58
   1  -3   1  199.63   12.16
   1   3   1  190.38   12.91
   1   3   1  205.97   15.66
  -1   3  -1  207.32   12.16
  -1  -3  -1  185.09   13.85
  -1  -3  -1  195.83   14.24
   1  -3   2   35.39    3.63
   1   3   2   29.41    4.58
   1   3   2   31.49    4.74
  -1  -3  -2   41.45    4.26
  -1  -3  -2   37.75    8.13
  -1   3  -2   28.17    4.15
   1   3   3  268.24   17.93
   1   3   3  262.02   25.66
   1  -3   3  260.25   16.90
   1   3   3  269.69   19.91
  -1  -3  -3  254.47   25.69
  -1  -3  -3  258.40   16.90
  -1   3  -3  254.04   16.07
   1   3   4   16.62    3.78
   1   3   4   17.56    5.77
   1   3   4   16.76    4.73
   1  -3   4   22.16    5.12
  -1  -3  -4   13.79    6.22
  -1   3  -4    8.59    3.17
  -1  -3  -4   11.23    5.20
  -1  -3  -4   14.83    3.40
   1   3   5  103.12   10.49
   1  -3   5  105.52    8.74
   1   3   5   94.20    8.12
  -1  -3  -5  111.26   10.69
  -1  -3  -5  108.58   13.18
  -1   3  -5   96.90    7.67
  -1  -3  -5  108.30    7.98
   1   3   6   -1.30    6.08
   1   3   6    0.98    3.06
   1  -3   6   -0.16    3.39
  -1  -3  -6    1.93    3.87
  -1  -3  -6   -4.70    3.97
  -1  -3  -6    3.81    5.60
  -1   3  -6    0.40    3.86
   1  -3   7   34.31    5.52
   1   3   7   34.65    5.11
   1   3   7   40.67    6.64
  -1  -3  -7   24.84    3.47
  -1   3  -7   26.50    4.30
  -1  -3  -7   26.90    4.18
  -1  -3  -7   34.31    8.42
   1   3   8   24.94    4.94
   1   3   8   29.92    6.74
   1  -3   8   17.10    5.13
  -1   3  -8   29.05    5.60
  -1  -3  -8   35.51    8.69
  -1  -3  -8   29.06    4.09
   1  -3   9   24.37    5.83
   1   3   9   33.43    5.27
   1   3   9   36.69    9.43
  -1   3  -9   30.69    4.30
  -1  -3  -9   18.28    5.63
   1   3  10   49.58    8.72
   1   3  10   71.88    7.10
   1  -3  10   45.11    6.98
  -1  -3 -10   49.37    5.62
  -1   3 -10   52.29    5.76
   1   3  11   52.72    9.19
   1  -3  11   55.33    6.82
   1   3  11   57.66    6.51
  -1  -3 -11   38.19    5.14
  -1   3 -11   35.31    5.38
   1  -3  12   17.40    5.29
   1   3  12   13.49    6.67
   1   3  12   31.48    5.00
  -1   3 -12   15.45    4.45
  -1  -3 -12   12.08    4.00
   1   3  13   27.47    5.65
   1  -3  13   39.53    6.33
   1   3  13   28.00    7.67
  -1  -3 -13   30.63    4.68
  -1   3 -13   18.20    4.70
   1  -3  14   38.99    7.24
   1   3  14   34.49    9.41
   1   3  14   48.31    6.87
  -1  -3 -14   31.51    5.22
   1   3  15   72.81    9.21
   1  -3  15   76.96    9.35
   1  -3  16    7.17    5.06
   1   3  16    9.98    6.65
   1  -3  17   25.57    9.23
   1   3  17   32.96    6.48
   1   3  18  134.91   14.41
   1  -3  18  143.25   15.07
   1  -3  19    4.51    6.03
   1   3  19    7.43    5.55
   1   3  20   18.05    6.59
   1  -3  20   24.04    8.17
   1   3  21   19.30    7.91
   1  -3  21   38.60    9.00
   1  -3  22   13.02    8.29
   1   3  22   11.99    7.09
   1  -3  23   26.86   12.20
   1   3  23   19.28    7.83
   1  -3  24   23.71    8.26
   1   3  24    2.83    7.57
   1   3  25   -4.47    8.92
   1  -3  25    0.90    6.87
   1   3  26   16.47    8.02
   1  -3  26    3.54    8.96
   1   3  27    1.23    7.24
   1  -3  27    4.93    7.75
   1  -3  28    9.08    9.63
   1   3  28   12.48    8.65
   1  -3  29    6.02    8.15
   1   3  29   -2.50    8.03
   1  -3  30    2.95    9.67
   1   3  30    3.43   10.94
   1   3  31    5.61   12.32
   1  -3  31   10.72   10.22
   1  -3  32    1.67   13.93
   1   3  32   11.15    9.45
   1  -3  33   17.90   10.93
   1   3  33    1.57    9.79
   1   3  34   -1.19   11.12
   1  -3  34   33.62   12.24
  -1  -4  34   19.36   11.40
  -1   4  34   -5.51    9.45
  -1   4  33   15.20    9.99
  -1   4  33    9.12   10.77
  -1  -4  33   -6.97   11.37
  -1   4  32    2.96    7.77
  -1   4  32   19.03   12.27
  -1  -4  32  -14.45    9.13
  -1   4  31   12.37   19.35
  -1   4  31   12.35    9.09
  -1  -4  31    9.25   10.85
  -1  -4  30   10.36   10.87
  -1   4  30    3.59   17.09
  -1   4  30   15.60    8.65
  -1   4  29    4.21    9.71
  -1   4  29   14.17    8.25
  -1  -4  29    3.85   13.31
  -1  -4  29    7.26    6.05
  -1  -4  28   -1.39    8.58
  -1   4  28   -1.99    9.71
  -1  -4  28   -5.63    5.00
  -1   4  28   13.96   10.52
  -1   4  27    4.87    7.61
  -1  -4  27    9.42    5.33
  -1  -4  27   -0.01    9.58
  -1   4  27    6.55    9.44
  -1   4  26    2.94    8.34
  -1  -4  26   -4.30    7.49
  -1   4  26    0.84    8.27
  -1  -4  26   -1.92    7.77
  -1  -4  25   10.57    9.06
  -1   4  25   13.36    6.70
  -1   4  25   11.43    9.57
  -1  -4  25    9.68    8.34
  -1  -4  24   45.56   11.58
  -1  -4  24   44.45   10.70
  -1   4  24   51.53    9.41
  -1   4  24   40.13    9.82
  -1  -4  23   24.49   11.47
  -1   4  23   20.13    7.73
  -1   4  23   19.74    9.24
  -1   4  22   43.67   10.45
  -1  -4  22   69.13   10.67
  -1   4  22   44.60    9.07
  -1  -4  21   29.16    7.92
  -1   4  21   10.74    7.68
  -1   4  21   20.21    6.58
  -1  -4  20    4.26    6.84
  -1   4  20   12.68    6.47
  -1   4  20    7.28    7.20
  -1   4  19   29.76    7.91
  -1  -4  19   44.97    8.11
  -1   4  19   22.81    6.55
  -1  -4  18   22.21    6.73
  -1   4  18   27.72    5.54
  -1   4  18   10.25    6.48
  -1   4  17   55.39    6.78
  -1   4  17   59.43   10.17
  -1  -4  17   64.77    9.59
   1  -4 -16   27.63    6.44
  -1   4  16   34.45    6.61
  -1   4  16   30.23    8.81
  -1  -4  16   40.83    7.16
  -1  -4  16   36.40    7.49
  -1   4  16   35.53    5.85
   1  -4 -15   42.71    5.65
  -1  -4  15   39.58    8.07
  -1   4  15   61.62    8.30
  -1   4  15   42.51    8.76
  -1   4  15   48.58    7.35
  -1  -4  15   51.00   10.11
   1  -4 -14  200.48   17.77
  -1   4  14  191.30   24.04
  -1   4  14  229.21   20.30
  -1  -4  14  230.43   20.65
  -1   4  14  214.28   18.09
   1  -4 -13   83.62    7.45
   1   4 -13   87.21    8.20
  -1   4  13   85.37   14.42
  -1  -4  13  103.24   10.33
  -1   4  13   96.34    8.72
  -1   4  13   93.15    9.27
   1   4 -12   71.58    7.57
   1  -4 -12   65.64    6.04
  -1  -4  12   82.37    9.11
  -1   4  12   68.64    7.00
  -1   4  12   67.73   11.86
  -1   4  12   93.42    9.41
   1  -4 -11   32.30    4.76
   1   4 -11   24.27    4.42
  -1   4  11   14.57    5.77
  -1   4  11   21.72    8.41
  -1   4  11   26.18    4.55
  -1  -4  11   34.40    6.03
   1  -4 -10   79.62    7.31
   1   4 -10   83.48    7.36
  -1   4  10   71.68    6.44
  -1   4  10   64.93   11.26
  -1   4  10   90.24    8.22
  -1  -4  10   79.55    8.73
   1   4  -9   78.59    7.25
   1  -4  -9   81.08    5.91
  -1   4   9   67.12    7.73
  -1  -4   9   67.71    8.26
  -1   4   9   75.69    6.25
  -1   4   9   68.05    8.38
   1   4  -8   23.90    4.23
   1  -4  -8   25.21    3.96
  -1  -4   8   18.02    5.17
  -1   4   8   19.66    6.59
  -1   4   8   24.42    4.56
  -1   4   8   20.18    3.53
   1  -4  -7    8.36    3.37
   1  -4  -7   11.58    2.69
   1  -4  -7   15.69    5.17
   1   4  -7   26.44    5.32
  -1   4   7   16.33    3.72
  -1   4   7   14.62    3.07
  -1  -4   7    6.40    4.59
  -1   4   7   14.02    4.17
   1   4  -6   46.29    5.42
   1  -4  -6   44.25    4.46
   1  -4  -6   36.03    3.75
   1  -4  -6   33.34    8.02
  -1   4   6   47.46    4.91
  -1  -4   6   49.87    6.26
  -1   4   6   39.00    6.70
  -1   4   6   48.47    4.97
   1   4  -5  271.84   25.91
   1  -4  -5  312.30   24.24
   1  -4  -5  279.07   16.58
   1  -4  -5  270.41   21.80
   1   4  -5  276.46   19.50
   1  -4  -5  271.10   17.07
  -1   4   5  250.66   19.40
  -1  -4   5  317.56   25.56
  -1   4   5  270.43   16.66
  -1   4   5  260.49   16.70
   1   4  -4  322.86   24.94
   1  -4  -4  282.91   24.41
   1  -4  -4  285.81   17.76
   1  -4  -4  277.28   23.05
   1   4  -4  334.90   22.55
   1  -4  -4  269.06   16.20
  -1  -4   4  274.85   20.37
  -1   4   4  307.18   21.66
  -1   4   4  309.30   18.82
   1   4  -3  242.19   16.27
   1  -4  -3  231.71   18.34
   1  -4  -3  199.15   14.76
   1   4  -3  235.15   21.60
   1  -4  -3  212.31   12.63
   1  -4  -3  222.17   13.11
  -1   4   3  231.35   14.04
  -1  -4   3  218.22   16.44
  -1  -4   3  201.03   15.64
  -1   4   3  215.86   12.70
   1   4  -2  120.35   10.23
   1  -4  -2  122.74    8.20
   1  -4  -2  116.97    9.56
   1  -4  -2  110.32    7.31
   1   4  -2  123.09    8.86
  -1   4   2  117.30    7.43
  -1  -4   2  128.65   10.20
  -1  -4   2  130.44    9.78
  -1   4   2  111.81    6.85
  -1   4   2  107.64   14.56
   1  -4  -1   10.14    3.12
   1  -4  -1   10.93    2.84
   1   4  -1   12.92    4.41
   1   4  -1   10.85    3.98
  -1   4   1    8.95    2.58
  -1  -4   1    9.21    3.85
  -1   4   1    5.82    5.25
  -1  -4   1    9.70    4.86
  -1   4   1   11.78    3.00
   1  -4   0   10.00    2.81
   1   4   0    8.17    2.98
   1   4   0    6.84    3.69
  -1  -4   0    9.65    3.87
  -1   4   0    6.81    2.64
  -1   4   0    6.69    3.52
  -1  -4   0    8.13    3.49
   1   4   1  121.44    9.49
   1  -4   1  120.81    8.75
   1   4   1  121.48    8.94
  -1   4  -1  123.15   10.72
  -1  -4  -1  136.58   10.85
  -1   4  -1  119.51    8.34
  -1  -4  -1  130.59    9.21
   1  -4   2  211.35   15.71
   1   4   2  232.82   16.19
   1   4   2  226.58   15.71
  -1   4  -2  246.93   14.42
  -1  -4  -2  224.67   15.20
  -1  -4  -2  228.81   19.07
   1   4   3  309.82   21.43
   1   4   3  321.92   23.11
   1   4   3  321.12   28.01
   1  -4   3  276.17   19.24
  -1  -4  -3  291.58   19.74
  -1   4  -3  315.29   20.13
  -1  -4  -3  302.79   28.53
   1   4   4  251.67   23.00
   1   4   4  271.66   19.14
   1  -4   4  307.19   23.03
   1   4   4  256.66   20.29
  -1   4  -4  267.90   18.00
  -1  -4  -4  303.57   22.11
  -1  -4  -4  274.68   24.18
   1   4   5   51.02    8.50
   1  -4   5   38.70    5.75
   1  -4   5   32.41    5.57
   1   4   5   39.67    5.18
  -1  -4  -5   42.68    6.14
  -1  -4  -5   41.66    8.61
  -1   4  -5   43.67    4.64
   1   4   6   16.57    6.83
   1   4   6   11.36    3.70
   1  -4   6   20.19    4.56
  -1  -4  -6   12.61    4.34
  -1   4  -6   17.64    3.55
  -1  -4  -6   19.13    5.21
  -1  -4  -6   17.55    6.77
   1  -4   7   22.25    6.35
   1   4   7   28.75    4.53
   1   4   7   28.05    5.72
  -1  -4  -7   22.13    3.86
  -1   4  -7   19.26    5.18
  -1  -4  -7   28.78    5.68
  -1  -4  -7   46.59    8.49
   1   4   8   69.94    7.09
   1   4   8   88.47   10.01
   1  -4   8   78.48    8.14
  -1  -4  -8   73.11    8.54
  -1  -4  -8  101.92   15.69
  -1   4  -8   65.31    6.50
  -1  -4  -8   81.73    6.85
   1   4   9   81.08    7.30
   1   4   9   57.65    8.85
   1  -4   9   64.35    7.84
  -1  -4  -9   72.21   15.63
  -1   4  -9   70.86    6.74
  -1  -4  -9   69.01    6.46
  -1  -4  -9   62.79   10.61
   1  -4  10   32.00    5.58
   1   4  10   38.50    7.28
   1   4  10   27.16    5.02
  -1  -4 -10   28.29    4.20
  -1   4 -10   20.64    5.72
  -1  -4 -10   29.26    8.73
   1   4  11   66.76   10.22
   1   4  11   76.43    9.41
   1  -4  11   65.64    7.82
  -1  -4 -11   63.71    6.26
  -1   4 -11   58.59    6.55
   1  -4  12   89.49    9.55
   1   4  12   95.45    9.22
   1   4  12   83.88   14.59
  -1   4 -12   71.22    7.71
  -1  -4 -12   97.78    8.15
   1   4  13  192.18   20.86
   1   4  13  211.93   17.43
   1  -4  13  213.28   18.40
  -1  -4 -13  188.24   15.71
   1  -4  14   55.53    8.36
   1   4  14   60.29    7.86
   1  -4  15   51.28    7.52
   1   4  15   31.00    6.26
   1   4  16   60.24    8.59
   1  -4  16   57.34    9.17
   1  -4  17   21.61    6.70
   1   4  17   22.82    5.92
   1  -4  18   28.74   10.40
   1   4  18   33.62    6.84
   1  -4  19    8.56    6.63
   1   4  19   13.41    5.74
   1  -4  20    1.37    6.61
   1   4  20   21.94    6.22
   1   4  21   26.08    7.62
   1  -4  21   34.60   11.68
   1   4  22   22.77    7.59
   1  -4  22   10.96    8.10
   1   4  23   38.98    9.11
   1  -4  23   29.61    9.79
   1   4  24    5.47    6.77
   1  -4  24   -0.16    7.22
   1  -4  25    4.88    9.06
   1   4  25    9.61    9.59
   1  -4  26   -3.22    7.79
   1   4  26    5.39    7.21
   1   4  27   15.17    8.67
   1  -4  27   18.23   13.26
   1   4  28    7.02    8.27
   1  -4  29   29.09   13.49
   1   4  29   -3.72   11.72
   1  -4  30    5.63   10.05
   1   4  30   11.65    8.86
   1  -4  31   -7.62   10.02
   1   4  31    9.09    8.50
   1   4  32   43.89   14.02
   1   4  32    8.77   11.66
   1  -4  32   27.98   17.19
   1  -4  33   -3.59    9.84
   1   4  33   11.88   12.57
  -1  -5  34    1.99   11.74
  -1   5  34   10.63   12.81
  -1   5  33   -2.54   10.90
  -1  -5  33    2.56    9.87
  -1   5  32  -19.81   10.92
  -1  -5  32    8.49   10.29
  -1   5  32    1.97   11.05
  -1   5  31   16.35    8.67
  -1   5  31    4.24   11.20
  -1  -5  31   -1.35   14.85
  -1  -5  30    3.34    9.68
  -1   5  30   16.54    8.16
  -1   5  30  -11.31    9.74
  -1   5  29    4.98    7.37
  -1   5  29   -4.29    7.51
  -1  -5  29   13.95    9.48
  -1   5  28   27.85    8.03
  -1  -5  28   -4.59   10.32
  -1   5  28   14.47   10.25
  -1  -5  27   11.64    9.17
  -1   5  27   14.52    7.42
  -1   5  27    1.43    7.19
  -1   5  26   16.09    7.94
  -1  -5  26    9.83    7.63
  -1   5  26  -12.33    6.64
  -1   5  25    8.62    8.66
  -1  -5  25   15.52    8.78
  -1   5  25    1.52    9.11
  -1   5  24   25.02    9.00
  -1  -5  24   32.83   11.86
  -1   5  24   19.70    7.60
  -1   5  23    7.63    7.07
  -1  -5  23    0.10    7.59
  -1   5  23    8.55    6.00
  -1  -5  22   42.19   10.42
  -1   5  22   32.21    8.28
  -1   5  22   47.32    9.43
  -1  -5  21    8.16    6.39
  -1   5  21    8.32    7.74
  -1   5  21    7.80    6.49
  -1   5  20    4.81    5.01
  -1   5  20    3.52    5.93
  -1  -5  20    8.07    6.14
  -1   5  19   32.83    5.69
  -1  -5  19   22.94    7.78
  -1   5  19   46.43    8.71
  -1  -5  18   33.00    7.79
  -1   5  18   30.63    6.78
  -1   5  18   29.27    6.16
  -1   5  17   13.33    6.19
  -1   5  17   12.18    4.94
  -1  -5  17    8.46    5.72
   1  -5 -16   18.36    4.57
  -1   5  16   34.00    6.86
  -1  -5  16   30.13    7.01
  -1   5  16   37.51    8.25
  -1   5  16   16.42    5.38
   1  -5 -15    5.52    4.16
  -1  -5  15    2.82    4.99
  -1   5  15    1.04    7.58
  -1   5  15    7.00    3.95
  -1   5  15    6.66    3.85
   1  -5 -14   39.17    6.27
  -1   5  14   49.01    6.02
  -1  -5  14   54.37    7.62
  -1   5  14   44.13    5.76
  -1   5  14   28.31   10.07
   1  -5 -13   51.65    5.20
  -1   5  13   46.18    5.56
  -1  -5  13   56.03    7.77
  -1   5  13   44.67    8.26
  -1   5  13   54.69    7.47
   1  -5 -12   -3.67    3.32
   1   5 -12    0.73    3.18
  -1   5  12   12.28    6.19
  -1  -5  12   -1.03    4.15
  -1   5  12    1.20    2.69
  -1   5  12    0.79    3.02
   1   5 -11   71.12    7.13
   1  -5 -11   75.28    6.97
  -1   5  11   72.66    6.35
  -1   5  11   63.66    5.79
  -1   5  11   63.30   10.54
  -1  -5  11   65.44    8.43
   1   5 -10   37.99    5.30
   1  -5 -10   39.30    3.94
  -1   5  10   40.25    4.10
  -1   5  10   41.46    4.74
  -1   5  10   45.95    8.78
  -1  -5  10   37.14    6.47
   1   5  -9   81.63    7.93
   1  -5  -9  105.23    8.22
  -1  -5   9   88.08    9.56
  -1   5   9   97.39    8.45
  -1   5   9  101.39   11.62
   1  -5  -8    2.91    5.83
   1  -5  -8    1.25    2.90
   1   5  -8    4.94    3.25
  -1   5   8    4.18    3.25
  -1   5   8    3.71    2.26
  -1   5   8    4.33    3.23
  -1  -5   8   -2.22    4.19
   1  -5  -7   44.52    3.84
   1   5  -7   53.18    5.82
   1  -5  -7   59.32    7.83
   1   5  -7   69.73    8.70
   1  -5  -7   49.86    5.05
   1  -5  -7   45.10    6.67
  -1   5   7   48.42    4.45
  -1   5   7   51.60    6.90
  -1  -5   7   44.74    6.89
  -1   5   7   47.43    5.33
   1  -5  -6   10.21    3.01
   1   5  -6   11.31    4.70
   1  -5  -6    6.91    4.85
   1   5  -6    4.95    4.95
   1  -5  -6   11.70    2.75
   1  -5  -6    6.97    5.37
  -1   5   6    7.69    3.06
  -1   5   6    8.56    2.65
  -1  -5   6    7.79    4.14
  -1   5   6    2.91    4.00
   1  -5  -5   75.00    9.79
   1  -5  -5   82.62    5.27
   1  -5  -5   83.15    6.20
   1   5  -5   94.45    9.58
   1  -5  -5   81.50    9.79
   1   5  -5   93.33    7.24
  -1   5   5   84.17    7.62
  -1   5   5   80.29    6.34
  -1  -5   5   76.09    7.95
   1  -5  -4   73.38    8.58
   1  -5  -4   86.96    9.53
   1   5  -4   80.48    9.04
   1   5  -4   85.82    7.10
   1  -5  -4   78.83    5.25
   1  -5  -4   76.41    5.87
  -1   5   4   80.75    6.08
  -1   5   4   80.10    6.48
  -1  -5   4   75.07    7.54
   1  -5  -3   75.65    8.71
   1  -5  -3   73.65    5.18
   1   5  -3   62.84    7.76
   1  -5  -3   72.66    6.32
   1   5  -3   66.67    6.39
  -1   5   3   65.29    5.81
  -1   5   3   66.02    5.24
  -1   5   3   63.70    9.87
  -1  -5   3   73.71    7.55
  -1  -5   3   78.51    7.51
   1  -5  -2   86.57    7.47
   1  -5  -2  103.55    7.73
   1   5  -2   89.28    7.28
   1  -5  -2   91.91    6.98
   1   5  -2   97.05    8.94
  -1  -5   2   96.70   11.01
  -1   5   2  101.70   11.29
  -1   5   2  102.44    7.59
  -1   5   2   98.58    6.50
  -1  -5   2   90.07    8.21
   1   5  -1  148.85   11.80
   1   5  -1  161.32   12.75
   1  -5  -1  147.26   12.11
   1  -5  -1  149.71   11.89
  -1  -5   1  139.93   11.40
  -1   5   1  161.48   10.07
  -1   5   1  170.91   15.48
  -1  -5   1  147.89   13.50
  -1   5   1  164.45   10.88
   1   5   0  148.23   11.36
   1  -5   0  138.35   10.34
   1   5   0  162.35   10.53
  -1  -5   0  137.49   10.49
  -1   5   0  150.74    9.69
  -1   5   0  143.31   11.08
  -1  -5   0  135.94   11.51
   1  -5   1   91.85    7.80
   1   5   1  115.36   10.85
   1   5   1   90.96    7.33
  -1  -5  -1   94.12   11.69
  -1   5  -1   96.29    7.43
  -1   5  -1   92.82    7.29
  -1  -5  -1   93.59    7.91
   1   5   2   77.31    6.62
   1   5   2   77.66    8.46
   1  -5   2   71.47    7.00
  -1   5  -2   66.42    6.24
  -1   5  -2   63.37    6.41
  -1  -5  -2   63.97    8.17
  -1  -5  -2   78.96    8.17
   1  -5   3   87.07    8.30
   1   5   3   73.20   11.72
   1   5   3   83.11    7.44
   1   5   3   81.27    7.16
  -1   5  -3   86.92    6.11
  -1  -5  -3   76.38    3.42
  -1  -5  -3   83.12    6.95
  -1  -5  -3   71.48    9.21
   1  -5   4   74.78    8.79
   1   5   4   96.44    9.95
   1   5   4   89.03   11.40
   1   5   4   79.54    6.96
  -1   5  -4   81.89    7.70
  -1  -5  -4   87.35    8.39
  -1  -5  -4   79.85    9.92
   1   5   5   10.66    4.18
   1  -5   5    7.80    3.60
   1   5   5   10.96    3.68
   1   5   5    4.70    6.34
  -1  -5  -5   15.31    5.79
  -1  -5  -5    8.37    3.01
  -1   5  -5    2.44    2.83
   1  -5   6   42.88    5.81
   1   5   6   41.31    5.50
   1   5   6   51.12    8.69
  -1   5  -6   49.77    6.38
  -1  -5  -6   53.31    8.91
  -1  -5  -6   46.08    6.36
   1  -5   7    5.28    3.72
   1   5   7    3.25    3.39
   1   5   7    3.55    4.08
  -1  -5  -7   -2.45    5.60
  -1   5  -7    2.96    2.64
  -1  -5  -7    2.59    2.69
  -1  -5  -7    0.23    4.69
   1   5   8   95.14    7.96
   1  -5   8   98.49   11.76
   1  -5   8   84.17    8.73
   1   5   8   78.76   11.75
  -1  -5  -8   82.13   12.38
  -1  -5  -8   78.20    9.91
  -1  -5  -8   88.29    8.63
  -1   5  -8   89.09    7.29
   1   5   9   47.38    9.05
   1   5   9   32.95    5.17
   1  -5   9   40.81    6.51
   1   5   9   35.22    2.89
  -1   5  -9   43.86    4.95
  -1  -5  -9   33.65    8.83
  -1  -5  -9   43.56    5.92
  -1  -5  -9   33.65    8.63
   1  -5  10   75.69    8.46
   1   5  10   54.04    6.47
   1   5  10   55.67    9.29
  -1  -5 -10   83.44   11.41
  -1   5 -10   61.47    6.40
  -1  -5 -10   70.51    8.55
  -1  -5 -10   61.82    6.44
   1   5  11    7.27    4.45
   1   5  11   13.48    6.53
   1  -5  11   -0.34    4.20
  -1  -5 -11   -0.74    4.10
  -1  -5 -11   -0.74    4.01
  -1  -5 -11    3.23    6.06
  -1   5 -11   -3.74    2.96
   1   5  12   51.95    8.22
   1   5  12   51.37    9.13
   1  -5  12   49.05    7.81
  -1  -5 -12   54.89    7.22
  -1  -5 -12   55.75    8.12
   1  -5  13   55.40    7.70
   1   5  13   28.89    8.85
   1   5  13   43.72    6.04
  -1  -5 -13   42.27    5.65
   1   5  14    9.03    4.30
   1  -5  14    6.11    5.13
   1  -5  15   43.89    7.44
   1   5  15   30.41    6.12
   1  -5  16    9.53    6.06
   1   5  16   14.06    5.28
   1   5  17   22.83    7.98
   1  -5  17   33.46    7.92
   1  -5  18   26.46    7.60
   1   5  18   40.71    7.37
   1  -5  19    1.38    5.22
   1   5  19   -1.21    4.77
   1  -5  20    2.18    6.72
   1   5  20   10.66    5.69
   1   5  21   39.67   10.65
   1  -5  21   24.58    8.90
   1   5  22    3.55    5.82
   1  -5  22   -5.23    6.27
   1   5  23   10.61    7.11
   1  -5  23   14.94    8.52
   1   5  24    5.48    7.23
   1  -5  24   10.90    8.31
   1   5  25   -3.80    9.41
   1  -5  25   10.98    7.67
   1  -5  26    8.24   11.21
   1   5  26   12.04    7.79
   1  -5  27   -2.44    8.54
   1   5  27   -6.75    9.59
   1  -5  28   13.56    9.27
   1   5  28   12.52    8.32
   1   5  28    3.96   12.25
   1   5  29    6.71    7.64
   1   5  29    5.31    8.64
   1  -5  29   26.56    9.80
   1   5  30  -10.13    8.03
   1   5  30    9.76   16.97
   1  -5  30   -1.41   13.22
   1  -5  31   18.39   11.74
   1   5  31    2.83   12.36
   1  -5  31    6.61   11.47
   1  -5  32    6.56    7.34
   1  -5  32    9.55   11.88
   1   5  32   18.54    9.78
   1   5  33  -16.14    9.55
   1  -5  33   14.40   12.47
   1  -5  33   12.93    6.70
  -1   6  34   11.33   11.55
  -1  -6  34   -7.00   11.32
  -1   6  33   16.18   13.09
  -1  -6  33    8.91   16.73
  -1  -6  32   16.79   12.10
  -1   6  32    2.19    8.65
  -1  -6  31    6.33    9.84
  -1   6  31   -0.18    8.12
  -1   6  30    2.57    7.28
  -1   6  30    2.83   10.31
  -1  -6  30    5.98   10.00
  -1   6  29    9.87   10.96
  -1   6  29   23.96    9.16
  -1  -6  29   22.35   11.26
  -1  -6  28   27.11    9.79
  -1   6  28    6.53    7.68
  -1   6  28   12.17   10.94
  -1   6  27    3.38    6.66
  -1   6  27   -2.21    7.98
  -1  -6  27    6.12   11.09
  -1   6  26   -0.88    7.20
  -1   6  26   -2.13    6.02
  -1  -6  26    3.36    7.09
  -1   6  25   21.11    7.37
  -1  -6  25    4.34    7.98
  -1   6  25    9.17    7.79
  -1   6  24   25.59    9.90
  -1  -6  24   26.13    9.07
  -1   6  24   12.38    7.96
  -1   6  23   56.37   10.09
  -1  -6  23   61.96   12.67
  -1   6  23   54.35   11.28
  -1  -6  22   40.20    8.69
  -1   6  22   11.56    5.89
  -1   6  22   22.50    9.10
  -1   6  21    0.54    5.43
  -1   6  21    5.12    5.01
  -1  -6  21    4.15    6.40
  -1  -6  20   18.16    8.39
  -1   6  20   -2.06    6.55
  -1   6  20    5.07    5.18
  -1  -6  19   14.99    6.25
  -1   6  19   13.07    5.25
  -1   6  19    8.60    5.26
  -1   6  18    0.88    3.98
  -1  -6  18    0.39    5.64
  -1   6  18    3.85    5.57
  -1  -6  17   22.59    7.16
  -1   6  17   25.40    7.10
  -1   6  17   18.79    4.95
   1  -6 -16   15.99    4.03
  -1   6  16   16.10    6.34
  -1   6  16    9.14    9.48
  -1  -6  16   15.54    6.22
  -1   6  16   17.47    4.34
   1  -6 -15   19.60    4.45
  -1   6  15   32.05    4.62
  -1  -6  15   40.91    6.85
  -1   6  15   22.96    9.65
  -1   6  15   37.86    6.90
   1  -6 -14   44.81    6.71
  -1  -6  14   41.76    7.78
  -1   6  14   45.17    5.05
  -1   6  14   48.05    5.86
  -1   6  14   25.58    7.78
   1  -6 -13  104.50   10.06
  -1   6  13  100.20   11.49
  -1   6  13   96.38   15.27
  -1  -6  13  116.68   12.24
  -1   6  13  115.12    8.35
   1  -6 -12  125.95   11.32
  -1   6  12  125.74   11.95
  -1   6  12  139.44   10.36
  -1   6  12  112.32   14.84
  -1  -6  12  145.34   13.51
   1   6 -11   23.59    4.71
   1  -6 -11   30.39    5.31
  -1   6  11   33.28    5.47
  -1   6  11   29.54    3.65
  -1  -6  11   46.69    6.71
  -1   6  11   39.55    7.31
   1  -6 -10    6.04    4.90
   1  -6 -10    1.01    4.96
   1   6 -10    2.80    3.48
   1  -6 -10    6.86    3.20
  -1   6  10   14.40    2.82
  -1  -6  10    0.99    4.26
  -1   6  10    6.24    2.87
  -1   6  10    3.29    5.40
   1  -6  -9   70.41    8.50
   1  -6  -9   79.66   11.45
   1   6  -9   69.51    7.11
   1  -6  -9   71.95    6.76
  -1   6   9   65.18    5.13
  -1   6   9   55.71    6.47
  -1   6   9   61.08    8.40
  -1  -6   9   85.12    8.64
   1  -6  -8  148.13   14.35
   1  -6  -8  153.33   16.10
   1  -6  -8  157.62   10.96
   1   6  -8  131.46   11.36
   1   6  -8  156.60   14.39
  -1  -6   8  146.50   13.02
  -1   6   8  146.46    9.18
  -1   6   8  147.25   10.84
  -1   6   8  143.65   12.97
   1  -6  -7   28.93    6.56
   1   6  -7   27.36    4.30
   1  -6  -7   15.00    2.58
   1   6  -7   30.67    6.01
   1  -6  -7   23.97    3.67
   1  -6  -7   19.22    5.95
  -1   6   7   24.58    4.83
  -1  -6   7   29.69    5.12
  -1   6   7   21.45    3.71
  -1   6   7   21.75    2.98
   1  -6  -6  108.62   12.60
   1  -6  -6  113.32    8.49
   1   6  -6  118.21   14.59
   1   6  -6  116.25    9.23
   1  -6  -6  127.38   13.26
   1  -6  -6  124.24    7.39
  -1  -6   6  106.06   12.84
  -1   6   6  115.26    9.03
  -1   6   6  127.81    8.76
  -1   6   6  132.53    7.77
   1  -6  -5   23.28    3.62
   1  -6  -5   20.20    5.30
   1   6  -5   23.47    5.41
   1   6  -5   22.61    8.05
  -1   6   5   19.40    3.87
  -1   6   5   23.41    3.67
  -1  -6   5   28.50    6.69
   1  -6  -4   50.56    6.00
   1   6  -4   58.23    5.53
   1  -6  -4   45.31    3.90
   1   6  -4   59.08    7.78
  -1   6   4   52.32    5.02
  -1   6   4   61.29    5.08
  -1  -6   4   40.72    5.86
   1   6  -3   84.93   10.65
   1  -6  -3   83.13    5.66
   1  -6  -3   81.23    7.71
   1  -6  -3   74.73    6.30
   1   6  -3   76.64    6.51
  -1   6   3   69.90    6.26
  -1   6   3   59.35   10.02
  -1  -6   3   79.90    7.88
  -1   6   3   64.27    5.36
  -1  -6   3   95.92    9.66
   1   6  -2    9.52    4.32
   1   6  -2    8.81    5.28
   1  -6  -2   11.33    3.21
   1  -6  -2   11.31    3.77
   1  -6  -2   10.38    3.47
  -1   6   2    5.85    2.84
  -1  -6   2   13.75    5.14
  -1   6   2   10.37    3.55
  -1   6   2    7.51    5.67
  -1  -6   2   15.06    5.20
   1   6  -1   32.26    5.61
   1  -6  -1   49.28    5.33
   1  -6  -1   43.84    5.26
   1   6  -1   37.38    6.12
  -1   6   1   45.46    4.45
  -1  -6   1   43.11    7.24
  -1   6   1   59.16    8.10
  -1  -6   1   36.38    5.66
  -1   6   1   43.48    5.35
   1   6   0   44.81    5.50
   1  -6   0   43.12    5.23
   1   6   0   38.66    4.48
   1  -6   0   41.88    5.55
  -1   6   0   36.53    4.40
  -1  -6   0   47.46    5.17
  -1  -6   0   45.58    6.37
  -1   6   0   38.73    5.60
   1   6   1   10.06    3.73
   1  -6   1   12.56    3.76
   1   6   1   11.41    4.31
  -1   6  -1    6.98    4.23
  -1   6  -1    7.44    3.25
  -1  -6  -1    7.70    4.48
  -1  -6  -1   13.73    3.45
   1   6   2   66.81    6.01
   1  -6   2   69.09    7.20
   1   6   2   68.71    6.61
  -1  -6  -2   73.93    7.85
  -1   6  -2   82.63    8.39
  -1   6  -2   71.76    6.39
  -1  -6  -2   57.28    7.88
   1   6   3   51.31    7.01
   1  -6   3   51.18    6.62
   1   6   3   48.30   10.02
   1   6   3   53.71    5.93
  -1  -6  -3   43.96    6.68
  -1   6  -3   55.27    4.53
  -1   6  -3   54.46    7.91
  -1  -6  -3   46.53    7.19
  -1   6  -3   56.02    4.91
   1   6   4   22.89    3.95
   1   6   4   18.86    5.21
   1   6   4   23.08    7.55
   1  -6   4   20.07    5.49
  -1  -6  -4   16.32    6.01
  -1   6  -4   22.21    6.82
  -1   6  -4   24.29    3.37
  -1  -6  -4   21.32    4.67
   1  -6   5  112.49   11.30
   1   6   5  119.39    9.34
   1   6   5  113.00   13.35
   1   6   5  119.80   10.62
  -1   6  -5  110.76    8.21
  -1  -6  -5  104.49   12.87
  -1  -6  -5   96.88    8.26
   1   6   6    2.97    4.06
   1   6   6   19.42    4.39
   1  -6   6   26.48    4.60
   1   6   6   26.83    4.41
  -1  -6  -6   21.68    3.93
  -1  -6  -6   10.37    6.98
  -1   6  -6   24.95    3.51
   1   6   7  134.41   14.66
   1   6   7  135.90   12.21
   1  -6   7  152.09   14.32
  -1  -6  -7  122.90   14.24
  -1   6  -7  140.70   10.36
  -1  -6  -7  144.51   12.23
   1   6   8   73.26   10.50
   1  -6   8   68.07    7.61
   1   6   8   60.49    6.87
  -1   6  -8   65.23    6.49
  -1  -6  -8   74.33    8.03
  -1  -6  -8   69.51   10.38
   1   6   9    1.48    6.11
   1  -6   9   10.65    5.53
   1   6   9    7.26    4.57
  -1  -6  -9    4.95    4.97
  -1  -6  -9    7.60    2.94
  -1   6  -9    5.24    3.28
  -1  -6  -9    1.82    8.92
   1   6  10   39.52    6.59
   1  -6  10   31.79    5.82
   1   6  10   29.35    2.16
   1   6  10   45.61    8.26
  -1  -6 -10   40.34    6.86
  -1   6 -10   25.43    4.49
  -1  -6 -10   31.89    5.70
  -1  -6 -10   47.79    8.71
   1  -6  11  128.41   12.84
   1   6  11  125.75   10.57
   1   6  11  120.84    7.45
   1   6  11  112.52   13.37
  -1   6 -11  100.02    9.84
  -1  -6 -11  133.34   10.54
  -1  -6 -11  150.13   15.95
   1   6  12   92.16    6.36
   1   6  12   84.02   12.16
   1   6  12  105.30    9.34
   1  -6  12  114.18   12.05
  -1  -6 -12   95.32    8.92
  -1  -6 -12  100.03   14.73
   1  -6  13   43.48    7.45
   1   6  13   31.12    7.79
   1   6  13   52.97    6.42
   1  -6  13   41.66    7.82
  -1  -6 -13   36.03    5.64
   1  -6  14   25.69    6.76
   1   6  14   34.13    5.59
   1  -6  14   30.67    6.95
   1   6  15   18.45    4.03
   1  -6  15   20.73    6.67
   1   6  15   18.12    5.28
   1   6  16   30.17    5.01
   1  -6  16   29.69    7.45
   1   6  16   29.86    8.36
   1  -6  17   17.57    6.43
   1   6  17    5.93    4.01
   1   6  17    1.35    4.91
   1   6  18    7.05    5.96
   1  -6  18   14.33    6.64
   1   6  18   14.30    5.30
   1   6  19    1.47    5.33
   1   6  19    4.36    4.85
   1  -6  19   11.52    6.66
   1   6  20    5.16    5.23
   1   6  20    4.73    5.37
   1  -6  20    1.53    6.31
   1  -6  21   22.00    9.08
   1   6  21   23.38    9.76
   1   6  21   18.17    7.13
   1   6  22   53.49    9.56
   1   6  22   41.91    8.94
   1  -6  22   13.46   11.38
   1   6  23   12.68    7.13
   1  -6  23    7.02    8.09
   1   6  23   15.99    7.34
   1  -6  24   11.18   11.69
   1   6  24   21.10    7.67
   1   6  24    3.77    9.81
   1   6  25   -5.00    6.61
   1  -6  25   -3.04    7.18
   1   6  25   -2.59    6.77
   1  -6  25    3.79    8.08
   1  -6  26   -1.82    8.24
   1  -6  26   -3.68    8.24
   1   6  26   -5.83    9.03
   1   6  26   -1.22    7.36
   1   6  27   -8.18    7.10
   1   6  27    3.87    8.11
   1  -6  27   13.38   10.83
   1  -6  27   -2.85    7.99
   1  -6  28    4.12    5.68
   1   6  28   28.15    8.30
   1  -6  28    8.49   10.40
   1   6  28    3.27   11.54
   1  -6  29   10.29    5.91
   1   6  29    1.39   11.09
   1  -6  29    6.95    9.82
   1  -6  30   -4.75    9.73
   1   6  30    7.88    8.13
   1   6  31   -6.00    8.90
   1  -6  31   13.70   10.23
   1   6  32   14.16   11.42
   1  -6  32  -10.18    9.96
   1  -6  33    9.50   13.53
   1   6  33    1.19    9.61
  -1   7  33    3.63   12.02
  -1  -7  33   18.71   16.24
  -1   7  32   13.47    8.44
  -1  -7  32  -13.06   10.66
  -1  -7  31   -8.36    9.38
  -1   7  31    1.05    7.53
  -1   7  30   -6.21    6.97
  -1  -7  30    8.31    8.42
  -1  -7  29    1.34    9.11
  -1   7  29   17.71   10.48
  -1  -7  28   15.36    8.94
  -1   7  28    2.92    7.60
  -1   7  27    6.31    8.54
  -1  -7  27   22.81    8.79
  -1   7  27    0.05    7.30
  -1   7  26    8.46    8.02
  -1   7  26    3.74   10.15
  -1  -7  26   13.91    8.53
  -1   7  25   16.08    7.29
  -1   7  25    3.94    7.37
  -1  -7  25   12.78    8.20
  -1   7  24    1.48    8.32
  -1  -7  24   11.51    7.59
  -1  -7  23    7.69    7.17
  -1   7  23    5.23    5.84
  -1   7  23    5.48    6.12
  -1  -7  22    1.70    6.54
  -1   7  22    5.03    5.23
  -1   7  22   -1.02    6.89
  -1  -7  21   12.83    6.67
  -1   7  21    4.92    4.93
  -1   7  21   -1.41    5.07
  -1   7  20   14.97    7.07
  -1  -7  20   21.28    7.91
  -1   7  20   12.56    5.15
  -1   7  19   20.39    5.89
  -1   7  19    9.44    6.87
  -1  -7  19   10.18    7.03
  -1  -7  18   30.40    9.45
  -1   7  18   18.58    5.29
  -1   7  18   17.95    4.40
  -1   7  17   36.95    6.33
  -1   7  17   32.44    5.42
  -1  -7  17   46.46    8.81
  -1  -7  16   -2.03    5.34
  -1   7  16    4.77    5.08
  -1   7  16    4.60    3.28
   1  -7 -15   15.83    4.37
  -1   7  15   18.50    7.34
  -1  -7  15   25.22    6.52
  -1   7  15   34.99    6.41
  -1   7  15   28.62    3.94
   1  -7 -14   13.65    3.89
  -1   7  14   11.10    5.87
  -1  -7  14   29.69    6.10
  -1   7  14   21.16    4.26
   1  -7 -13   26.09    4.12
  -1  -7  13   42.21    7.02
  -1   7  13   30.67    6.19
  -1   7  13   27.64    4.68
  -1   7  13   26.22    4.27
   1  -7 -12   32.77    5.14
  -1   7  12   36.12    4.30
  -1  -7  12   26.02    8.62
  -1   7  12   24.90    3.12
  -1   7  12   23.38    7.49
   1  -7 -11   20.74    6.95
   1  -7 -11   31.63    4.79
  -1   7  11   26.25    2.86
  -1  -7  11   36.66    6.17
  -1   7  11   27.37    4.88
  -1   7  11   32.59    6.72
   1  -7 -10   22.28    3.53
   1  -7 -10   27.72    8.75
   1   7 -10   34.08    7.22
   1   7 -10   30.21    4.66
  -1   7  10   26.77    4.73
  -1   7  10   18.52    2.93
  -1   7  10   27.46    6.27
  -1  -7  10   35.42    6.16
   1   7  -9   55.88   11.64
   1   7  -9   47.91    7.75
   1  -7  -9   50.89    5.75
   1  -7  -9   46.59    9.99
  -1  -7   9   50.21    9.31
  -1   7   9   60.71    5.95
  -1   7   9   57.18    3.84
  -1   7   9   65.17    7.35
   1  -7  -8   61.72    4.38
   1  -7  -8   52.17   10.02
   1  -7  -8   57.92    5.93
   1   7  -8   54.93    4.65
   1   7  -8   64.40    6.67
   1   7  -8   66.62    9.07
   1  -7  -8   56.93    9.25
  -1  -7   8   71.68    7.64
  -1   7   8   69.68    5.11
  -1   7   8   55.35    7.09
  -1   7   8   60.31    4.96
   1  -7  -7   36.27    3.55
   1  -7  -7   46.84    8.02
   1   7  -7   40.10    5.45
   1  -7  -7   37.05    4.78
   1   7  -7   43.62    7.32
   1  -7  -7   52.26    8.15
  -1   7   7   51.63    5.14
  -1  -7   7   42.15    6.25
  -1   7   7   41.04    5.44
   1  -7  -6   18.80    2.52
   1   7  -6   25.56    8.01
   1   7  -6   24.76    4.20
   1  -7  -6   28.13    6.39
   1  -7  -6   15.62    3.52
  -1   7   6   29.41    4.28
  -1   7   6   24.88    4.08
  -1  -7   6   32.49    6.43
   1  -7  -5   43.41    7.08
   1  -7  -5   38.37    3.42
   1  -7  -5   48.44    4.88
   1   7  -5   33.92    6.53
   1   7  -5   26.36    4.71
  -1   7   5   35.95    4.53
  -1  -7   5   36.46    5.26
  -1   7   5   36.25    4.47
   1  -7  -4  108.43    8.52
   1  -7  -4  120.37   11.30
   1   7  -4  129.40   11.57
   1  -7  -4  113.80    7.31
   1   7  -4  144.94   11.57
  -1   7   4  145.58   14.24
  -1  -7   4   99.75    9.27
  -1   7   4  123.41    8.60
  -1   7   4  118.48    9.02
   1  -7  -3   85.28    6.28
   1   7  -3   97.78    7.75
   1  -7  -3   85.76    8.54
   1   7  -3  114.79   11.57
   1  -7  -3   81.21    7.00
  -1  -7   3   91.12   10.41
  -1   7   3   92.93    7.87
  -1   7   3   93.61   11.25
  -1   7   3   93.84    6.88
  -1  -7   3   73.97    7.91
   1   7  -2   38.92    4.28
   1  -7  -2   32.92    4.44
   1  -7  -2   28.62    4.57
   1  -7  -2   30.82    5.22
   1   7  -2   26.75    5.20
  -1   7   2   30.16    4.03
  -1  -7   2   38.82    5.51
  -1   7   2   41.96    7.65
  -1  -7   2   26.49    6.59
  -1   7   2   36.02    4.91
   1  -7  -1   55.90    5.96
   1   7  -1   64.57    7.98
   1   7  -1   46.26    6.28
   1  -7  -1   53.45    5.08
  -1   7   1   46.02    8.46
  -1   7   1   55.07    4.94
  -1  -7   1   52.17    8.01
  -1  -7   1   37.48    5.71
  -1   7   1   56.00    6.27
   1   7   0   54.35    5.30
   1  -7   0   49.60    6.16
   1  -7   0   35.66    5.72
   1   7   0   50.56    7.91
  -1   7   0   55.83    6.27
  -1   7   0   61.78    5.42
  -1  -7   0   56.76    7.38
  -1  -7   0   45.42    8.30
   1   7   1   33.63    5.04
   1   7   1   36.70    4.27
   1  -7   1   25.74    4.70
  -1   7  -1   22.98    3.28
  -1  -7  -1   39.06    4.62
  -1  -7  -1   37.08    5.50
  -1   7  -1   31.45    5.62
   1   7   2  101.39   10.70
   1   7   2  103.93    7.56
   1  -7   2   97.31    8.84
  -1  -7  -2   73.80    7.14
  -1  -7  -2   83.27   11.59
  -1   7  -2   99.49    8.27
  -1   7  -2   95.00    8.16
   1   7   3  120.36   14.36
   1   7   3  117.33    8.93
   1   7   3  114.59   10.16
   1  -7   3   93.18    7.87
  -1  -7  -3   93.02   13.38
  -1  -7  -3  102.43    9.92
  -1   7  -3  128.58   12.17
  -1   7  -3  106.40    7.55
   1  -7   4   35.34    6.16
   1   7   4   38.02    5.02
   1   7   4   32.15    8.48
   1   7   4   40.75    4.80
  -1  -7  -4   43.86    4.90
  -1  -7  -4   41.81    7.20
  -1   7  -4   23.90    3.86
  -1   7  -4   45.04    7.60
   1   7   5   17.99    4.16
   1  -7   5   22.85    5.94
   1   7   5   26.35    4.28
   1   7   5   33.20    7.53
  -1  -7  -5   22.43    3.77
  -1   7  -5   43.54    7.66
  -1   7  -5   29.52    4.78
  -1  -7  -5   21.15    8.50
   1   7   6   52.51    9.38
   1  -7   6   43.25    5.84
   1   7   6   49.41    7.29
   1   7   6   43.65    5.29
  -1  -7  -6   42.49    6.38
  -1   7  -6   37.56    4.70
  -1  -7  -6   52.34    8.35
   1   7   7   59.53    6.83
   1  -7   7   66.89    7.34
   1   7   7   61.73    7.88
  -1  -7  -7   60.45    6.14
  -1  -7  -7   66.69    9.57
  -1   7  -7   55.46    5.51
   1   7   8   60.57    6.12
   1   7   8   59.08    9.19
   1  -7   8   50.96    6.72
  -1   7  -8   45.21    5.54
  -1  -7  -8   50.64    9.94
  -1  -7  -8   62.70    5.86
   1   7   9   14.14    5.37
   1   7   9   22.15    5.98
   1  -7   9   35.05    5.50
  -1   7  -9   21.21    4.34
  -1  -7  -9   24.52    7.27
  -1  -7  -9   29.26    4.15
   1   7  10   36.03    5.96
   1  -7  10   35.99    6.03
   1   7  10   32.04    4.76
  -1   7 -10   17.92    4.43
  -1  -7 -10   27.76    4.59
  -1  -7 -10   46.63    8.11
   1   7  11   22.34    6.24
   1   7  11   30.01    5.10
   1  -7  11   33.18    6.10
  -1  -7 -11   21.79    8.62
  -1  -7 -11   28.85    4.69
   1  -7  12   34.21    6.62
   1   7  12   29.91    5.01
   1   7  12    8.77    6.58
  -1  -7 -12   23.79    4.91
  -1  -7 -12   26.33    8.52
   1  -7  13   16.47    6.03
   1   7  13   18.69    4.72
  -1  -7 -13   22.76    8.19
   1  -7  14   25.45    7.10
   1   7  14   33.13    5.55
   1   7  14   19.85    3.31
   1  -7  15   -4.46    5.38
   1   7  15   10.03    4.32
   1   7  15    4.78    2.55
   1   7  16   33.90    6.51
   1  -7  16   41.02    7.86
   1  -7  17   11.26    9.21
   1   7  17   17.21    7.39
   1   7  17   11.50    3.59
   1   7  18   15.41    5.81
   1  -7  18   19.95    7.20
   1   7  18   10.77    4.20
   1   7  19   12.51    4.37
   1   7  19   10.32    5.68
   1  -7  19    6.39    7.37
   1   7  20    8.63    4.33
   1   7  20   -2.66    5.98
   1  -7  20    6.05    6.94
   1   7  21    2.65    7.85
   1  -7  21   -8.80    6.74
   1   7  21   -4.55    4.61
   1   7  22    0.14    7.78
   1   7  22    6.54    5.45
   1  -7  22    7.80    7.39
   1   7  23   -2.42    6.21
   1   7  23   22.94    6.23
   1  -7  23   -4.13    7.52
   1   7  24   21.45    7.12
   1  -7  24    4.96    8.64
   1   7  24   12.46    7.43
   1   7  25   14.70    9.63
   1   7  25   10.23    7.85
   1  -7  25   -0.14   11.70
   1  -7  26    1.23    8.12
   1   7  26    5.69    7.30
   1  -7  27    0.58    8.71
   1   7  27    2.81    9.38
   1  -7  28   15.91   12.64
   1   7  28    7.83    8.20
   1   7  29  -23.98   11.64
   1  -7  29   -3.82   10.10
   1  -7  30    0.66    9.42
   1   7  30   10.12    8.50
   1  -7  31   18.41   11.43
   1   7  31    6.47    9.60
   1   7  32   10.04   11.83
   1  -7  32   -0.55   10.18
  -1  -8  32   19.11   16.40
  -1   8  32   21.64    9.86
  -1  -8  31   22.39   11.94
  -1   8  31   15.98    9.25
  -1  -8  30   18.92   11.37
  -1   8  30   17.07   12.48
  -1  -8  29    7.00    9.80
  -1   8  29    8.14   10.31
  -1  -8  28   10.10    8.93
  -1   8  28   -1.76    7.19
  -1   8  27   17.08   11.18
  -1  -8  27   28.58   13.30
  -1   8  26    8.03    7.37
  -1  -8  26   49.31   13.08
  -1  -8  25   17.06   11.94
  -1   8  25    1.06    6.81
  -1   8  25   19.91    9.50
  -1   8  24   15.94    6.70
  -1   8  24    8.68    7.18
  -1  -8  24   -2.54    8.15
  -1   8  23    1.15    5.19
  -1   8  23  -13.29    7.50
  -1  -8  23   23.49    7.30
  -1   8  22   12.22    5.40
  -1   8  22   10.67    5.78
  -1  -8  22   19.51    8.26
  -1   8  21   16.50    5.77
  -1  -8  21   21.66    8.25
  -1   8  21   17.89    7.99
  -1  -8  20   -2.08    7.36
  -1   8  20   10.46    6.73
  -1   8  20    7.06    3.97
  -1   8  19   -3.11    6.57
  -1  -8  19   12.76    7.45
  -1   8  19    8.96    3.83
  -1   8  18   59.06    8.15
  -1  -8  18   84.31   11.27
  -1   8  18   75.55   10.84
  -1   8  17   13.00    6.89
  -1   8  17   22.81    4.68
  -1  -8  17   23.46    9.98
  -1   8  16    0.26    2.68
  -1  -8  16   -3.16    5.46
  -1   8  16    4.77    3.54
   1  -8 -15    5.99    4.34
  -1   8  15    6.04    4.75
  -1   8  15    3.12    2.96
  -1   8  15   -4.28    6.39
  -1  -8  15    1.09    5.55
   1  -8 -14   24.17    6.04
  -1   8  14   27.28    4.80
  -1   8  14   31.04    3.53
  -1   8  14   13.84    6.31
  -1  -8  14   40.98    9.39
   1  -8 -13   30.95    5.70
   1   8 -13   35.98    8.40
  -1   8  13   25.49    7.47
  -1   8  13   31.76    4.69
  -1  -8  13   24.29    7.49
   1  -8 -12    9.91    3.24
   1   8 -12   -0.50    6.37
   1  -8 -12    4.08    5.58
  -1   8  12   10.35    4.46
  -1  -8  12    5.20    5.12
  -1   8  12    7.27    1.94
  -1   8  12   14.28    5.79
   1   8 -11   28.55    8.23
   1  -8 -11   33.18    5.22
   1  -8 -11   34.68    7.06
  -1   8  11   28.14    3.01
  -1  -8  11   37.34    6.33
  -1   8  11   37.84    7.07
  -1   8  11   34.07    5.30
   1  -8 -10    7.77    7.35
   1   8 -10   19.21    6.29
   1  -8 -10   13.32    3.13
  -1  -8  10   18.30    5.13
  -1   8  10   15.93    2.60
  -1   8  10   12.78    3.16
  -1   8  10   11.80    4.77
   1  -8  -9   53.78   10.50
   1  -8  -9   46.47    3.73
   1  -8  -9   54.60    6.04
   1   8  -9   62.28    9.30
  -1   8   9   52.16    7.10
  -1   8   9   62.52    6.02
  -1  -8   9   43.45    7.01
   1  -8  -8   90.08    7.78
   1  -8  -8  106.58   11.97
   1   8  -8   98.71   11.42
   1  -8  -8   79.44    5.30
   1   8  -8   81.71    8.48
  -1   8   8   97.60    7.76
  -1   8   8   94.89    9.09
  -1  -8   8   96.15    9.57
   1  -8  -7   95.46    8.03
   1  -8  -7   91.83    5.93
   1   8  -7   97.11   11.67
   1  -8  -7  112.59   12.45
   1   8  -7   73.52    7.73
  -1   8   7  116.52    8.91
  -1   8   7  105.28    8.14
  -1  -8   7   92.04    9.53
   1   8  -6    1.23    5.06
   1  -8  -6   10.43    3.38
   1   8  -6    5.73    4.50
   1  -8  -6   12.80    5.18
   1  -8  -6    3.78    2.15
  -1   8   6    3.46    2.87
  -1   8   6    7.40    3.34
  -1  -8   6    8.88    4.03
   1   8  -5    9.27    4.47
   1  -8  -5    6.26    2.52
   1  -8  -5    2.62    3.24
   1  -8  -5    4.44    4.97
   1   8  -5    1.46    3.31
  -1   8   5    9.69    3.04
  -1   8   5    7.45    3.40
  -1  -8   5   12.28    3.81
   1  -8  -4    7.33    5.46
   1  -8  -4   12.56    3.41
   1   8  -4   18.95    4.60
   1  -8  -4   10.21    2.95
   1   8  -4    9.93    3.47
  -1  -8   4   12.30    4.06
  -1   8   4   12.56    3.17
  -1   8   4   10.74    6.15
  -1   8   4    7.06    3.75
   1   8  -3   98.88   11.47
   1   8  -3  103.11    9.38
   1  -8  -3   81.78    9.25
   1  -8  -3   95.75    7.56
   1  -8  -3   80.83    7.35
  -1  -8   3  112.38   11.48
  -1   8   3   70.05   11.08
  -1   8   3   86.08    6.76
  -1   8   3  102.39    8.11
  -1  -8   3   77.18    8.53
   1  -8  -2   63.55    6.24
   1   8  -2   43.39    6.51
   1   8  -2   51.78    5.47
   1  -8  -2   53.40    5.45
   1  -8  -2   58.65    6.93
  -1   8   2   67.10    6.56
  -1   8   2   61.69    5.41
  -1   8   2   72.33    9.42
  -1  -8   2   61.05    6.52
  -1  -8   2   47.45    6.79
   1   8  -1   19.46    6.19
   1  -8  -1   21.09    3.68
   1  -8  -1   22.66    4.66
   1   8  -1   18.05    3.74
  -1   8   1   23.01    6.85
  -1   8   1   19.45    4.87
  -1   8   1   21.51    3.58
  -1  -8   1   25.27    4.35
  -1  -8   1   25.94    6.60
   1  -8   0   23.55    4.72
   1   8   0   16.26    4.60
   1   8   0   22.86    4.60
  -1   8   0   22.26    3.59
  -1  -8   0   36.47    6.58
  -1  -8   0   28.69    4.49
  -1   8   0   21.71    3.90
   1   8   1   68.31    8.46
   1  -8   1   44.03    6.54
   1   8   1   61.83    6.76
  -1  -8  -1   67.70    6.29
  -1   8  -1   52.56    5.54
  -1   8  -1   57.17    7.09
  -1  -8  -1   52.16    9.37
   1   8   2   87.93    7.96
   1   8   2   69.83    6.61
   1  -8   2  106.29    9.13
  -1   8  -2   91.95    8.05
  -1   8  -2   90.35    9.27
  -1  -8  -2   94.71    8.29
  -1  -8  -2   97.49    9.92
   1   8   3   10.63    3.31
   1  -8   3    8.48    3.44
   1   8   3    6.73    3.79
   1   8   3   15.66    6.62
  -1   8  -3    8.84    3.88
  -1  -8  -3    8.65    5.10
  -1   8  -3    1.99    3.97
  -1  -8  -3   18.03    3.33
   1   8   4    8.06    6.31
   1   8   4    8.82    4.39
   1   8   4    8.51    4.60
   1  -8   4    9.85    4.46
  -1   8  -4    5.39    5.42
  -1  -8  -4    8.24    6.49
  -1  -8  -4    7.97    3.08
  -1  -8  -4    2.39    1.15
  -1   8  -4    5.64    3.61
   1  -8   5   11.20    4.66
   1   8   5    5.68    3.54
   1   8   5    3.50    6.49
   1   8   5    9.63    4.74
  -1   8  -5    3.79    5.97
  -1  -8  -5    6.52    5.28
  -1  -8  -5    7.89    4.25
  -1   8  -5    6.42    2.81
   1   8   6  102.03   13.69
   1   8   6  101.59    8.91
   1   8   6  107.20    8.91
   1  -8   6  112.80    9.09
  -1  -8  -6  100.24    8.10
  -1  -8  -6   92.16   11.79
  -1   8  -6   97.19   10.01
  -1   8  -6   87.93    7.50
   1   8   7   91.04    8.09
   1   8   7   76.36    7.95
   1  -8   7   94.20    8.76
  -1  -8  -7   99.94   11.90
  -1   8  -7   85.32    7.80
  -1  -8  -7   94.90    7.65
  -1   8  -7   98.61   13.37
   1  -8   8   47.18    6.94
   1   8   8   65.60    7.80
   1   8   8   51.18    8.35
  -1  -8  -8   54.03    7.25
  -1  -8  -8   60.86   12.67
  -1   8  -8   50.52    7.24
   1   8   9   16.50    4.18
   1   8   9   10.36    4.80
   1  -8   9   36.76    5.20
  -1  -8  -9    9.63    9.24
  -1  -8  -9   13.60    3.80
  -1   8  -9    5.81    3.99
   1  -8  10   27.97    6.46
   1   8  10   40.54    6.47
   1   8  10   21.52    6.21
  -1  -8 -10   27.57    4.48
  -1  -8 -10   41.64   11.25
   1   8  11    5.25    4.74
   1  -8  11    3.76    4.85
   1   8  11   14.07    5.09
  -1  -8 -11    7.34    3.47
  -1  -8 -11    5.14    6.94
   1   8  12   35.91    5.80
   1  -8  12   32.74    6.93
  -1  -8 -12   38.07   12.37
   1   8  13   39.81    6.04
   1  -8  13   42.56    7.62
  -1  -8 -13   28.71   10.34
   1  -8  14    3.62    5.41
   1   8  14    5.16    4.17
  -1  -8 -14    5.31   10.22
   1  -8  15    1.32    5.04
   1   8  15    3.12    5.43
   1   8  16   10.34    5.51
   1   8  16   17.20    3.34
   1  -8  16   14.76    6.83
   1  -8  17   88.21   12.31
   1   8  17   61.45   11.19
   1   8  18    3.88    2.91
   1   8  18    0.12    5.41
   1  -8  18    4.07    6.26
   1   8  19    1.92    5.44
   1  -8  19    7.34    8.73
   1   8  19    4.01    3.25
   1  -8  20   21.70    8.18
   1   8  20   12.92    6.49
   1   8  20   12.85    5.29
   1  -8  21   10.32    8.12
   1   8  21    4.08    6.10
   1   8  21   14.16    4.63
   1   8  22    0.51    5.26
   1   8  22    3.18    5.78
   1  -8  22    2.23    6.77
   1   8  23   16.52    9.18
   1  -8  23   14.43    8.89
   1   8  23    3.15    5.64
   1  -8  24   22.70    9.56
   1   8  24   13.48   10.22
   1   8  25   26.02    8.11
   1  -8  25   13.08    9.82
   1  -8  26   31.61   12.97
   1   8  26   -0.67   10.87
   1   8  27    2.98    7.90
   1  -8  27   20.99    9.77
   1  -8  28   13.68    9.58
   1   8  28    2.89    8.36
   1  -8  29   14.75    9.12
   1   8  29   -5.99    8.00
   1   8  30   11.21   13.15
   1  -8  30   18.14   11.31
   1   8  31    7.81    8.22
   1  -8  31  -10.70    9.85
  -1   9  32  -15.87   11.94
  -1  -9  32    1.86   11.01
  -1  -9  31   -0.21   13.25
  -1   9  31   -1.99    7.71
  -1   9  30   -3.81    9.72
  -1  -9  30    6.22    9.50
  -1  -9  29   20.81   10.97
  -1   9  29   18.27   11.79
  -1   9  28   -1.84    6.28
  -1  -9  28    2.17    8.57
  -1  -9  27   -8.07    9.15
  -1   9  27   -0.23    8.88
  -1   9  26    1.67    5.87
  -1  -9  26   -2.37    7.97
  -1   9  25   14.57    9.44
  -1  -9  25    6.11    8.51
  -1  -9  24    1.12    8.47
  -1   9  24    8.20    6.03
  -1   9  23    2.73    4.63
  -1  -9  23   -7.03    9.02
  -1   9  23   -0.10    4.09
  -1  -9  22   -3.42    6.87
  -1   9  22   -0.18    6.25
  -1   9  22    0.18    3.66
  -1   9  21    7.51    3.70
  -1  -9  21   -2.76    7.23
  -1   9  21    4.29    6.78
  -1  -9  20   16.42    7.24
  -1   9  20    2.17    4.92
  -1   9  20    8.40    3.35
  -1   9  19    1.54    3.23
  -1  -9  19   27.19    6.86
  -1   9  19    6.18    4.74
  -1  -9  18    7.38    6.66
  -1   9  18    7.70    2.85
  -1   9  18    1.07    5.93
  -1   9  17    5.05    6.03
  -1   9  17    7.42    2.76
  -1  -9  17    4.64    6.67
   1   9 -16    6.30    7.98
  -1   9  16    3.94    4.04
  -1  -9  16    8.29    6.12
   1   9 -15   10.81    7.71
   1  -9 -15   17.15    5.48
  -1  -9  15   16.27    6.41
  -1   9  15    8.43    2.28
  -1   9  15   15.53    5.43
   1  -9 -14   15.97    5.09
   1   9 -14   17.61    7.67
  -1   9  14   17.62    5.51
  -1  -9  14   17.03    6.21
  -1   9  14    9.97    2.65
  -1   9  14   15.25    7.27
   1  -9 -13    4.90    4.41
   1   9 -13    2.11    7.00
  -1   9  13    9.17    1.98
  -1   9  13    6.71    6.10
  -1  -9  13    4.28    5.65
  -1   9  13   15.08    4.64
   1  -9 -12   10.42    4.55
   1  -9 -12   15.44    8.14
   1   9 -12   17.73    7.15
  -1   9  12    5.14    5.87
  -1   9  12   17.78    3.31
  -1  -9  12    5.20    5.62
   1  -9 -11   31.14    8.54
   1  -9 -11   29.54    4.88
   1   9 -11   17.18    7.39
  -1   9  11   18.32    6.02
  -1   9  11   21.24    4.91
  -1  -9  11   29.05    6.56
   1   9 -10   -0.68    5.70
   1  -9 -10    1.70    3.49
   1  -9 -10    7.45    5.17
  -1   9  10    5.59    3.57
  -1   9  10    1.17    4.10
  -1  -9  10    5.81    4.56
   1  -9  -9   25.80    4.93
   1  -9  -9   23.87    2.54
   1   9  -9   29.05    7.28
   1  -9  -9   36.87    8.27
  -1   9   9   23.40    4.64
  -1   9   9   23.96    5.13
  -1  -9   9   32.28    5.94
   1   9  -8   56.10   10.87
   1  -9  -8   44.98    3.54
   1  -9  -8   38.44    5.71
   1  -9  -8   44.90    8.89
  -1   9   8   43.50    5.94
  -1   9   8   37.44    5.31
  -1  -9   8   52.25    9.16
   1  -9  -7   15.07    6.32
   1  -9  -7   10.24    3.80
   1   9  -7   14.81    7.98
   1  -9  -7    7.87    2.39
  -1   9   7   11.69    3.51
  -1  -9   7   17.57    6.27
   1   9  -6   53.93   11.12
   1  -9  -6   58.41    4.35
   1   9  -6   68.00    8.89
   1  -9  -6   77.01   10.01
   1  -9  -6   71.62    6.65
  -1   9   6   68.70    6.30
  -1  -9   6   58.47    9.79
  -1   9   6   75.94    6.66
   1   9  -5    6.12    4.28
   1  -9  -5    6.99    3.36
   1   9  -5    4.61    3.15
   1  -9  -5    3.29    2.03
   1  -9  -5    1.58    5.11
  -1  -9   5    7.65    4.10
  -1   9   5    3.85    3.38
  -1   9   5    4.15    2.93
   1  -9  -4   27.00    3.87
   1   9  -4   13.69    5.00
   1   9  -4   19.31    5.31
   1  -9  -4   24.85    5.81
   1  -9  -4   11.00    3.52
  -1   9   4   12.61    4.07
  -1   9   4   26.95    7.26
  -1   9   4   14.25    3.49
  -1  -9   4   15.54    4.47
   1  -9  -3    2.65    3.47
   1   9  -3    1.87    3.94
   1   9  -3    4.33    3.94
   1  -9  -3    6.57    4.66
   1  -9  -3    3.18    2.44
  -1   9   3    5.80    2.87
  -1  -9   3   -4.52    4.02
  -1   9   3    4.89    3.38
  -1  -9   3   -1.12    5.03
  -1   9   3    7.52    5.48
   1   9  -2    5.93    5.31
   1  -9  -2    6.97    4.51
   1   9  -2    0.46    3.83
   1  -9  -2    5.21    3.64
   1  -9  -2    1.77    3.03
  -1  -9   2    0.89    4.90
  -1   9   2    3.16    2.86
  -1   9   2    3.88    5.59
  -1  -9   2    9.98    5.02
  -1   9   2    6.09    3.57
   1   9  -1    4.20    3.84
   1  -9  -1    5.08    4.01
   1   9  -1    8.93    2.97
   1  -9  -1    8.64    3.26
  -1   9   1    2.93    3.99
  -1  -9   1    4.97    4.13
  -1   9   1    6.16    5.54
  -1   9   1    6.97    3.06
  -1  -9   1    1.71    3.44
   1   9   0    3.18    2.85
   1  -9   0    7.84    4.35
   1   9   0    9.74    3.66
  -1   9   0    9.05    3.34
  -1  -9   0    9.02    5.02
  -1  -9   0    5.17    4.01
  -1   9   0    4.05    4.15
   1  -9   1    9.71    4.36
   1   9   1    7.22    3.75
   1   9   1    3.06    3.72
  -1   9  -1    5.25    2.48
  -1  -9  -1    6.00    4.27
  -1   9  -1    4.20    4.21
  -1  -9  -1    2.14    3.33
   1  -9   2    2.11    4.31
   1   9   2    4.87    2.85
   1   9   2    4.76    4.74
  -1  -9  -2   13.77    4.33
  -1  -9  -2    8.89    5.49
  -1   9  -2    0.60    3.56
  -1   9  -2   -1.58    4.56
   1  -9   3   15.44    5.27
   1   9   3   11.03    3.58
   1   9   3   22.83    7.84
   1   9   3   42.52    5.88
  -1  -9  -3   12.09    3.92
  -1   9  -3   17.52    3.48
  -1   9  -3   22.53    6.01
  -1  -9  -3   21.96    7.72
   1  -9   4    8.85    3.43
   1   9   4    5.58    6.36
   1   9   4    8.25    3.60
   1   9   4    2.24    3.20
  -1  -9  -4    5.14    1.33
  -1   9  -4    3.72    2.71
  -1  -9  -4   14.83    7.00
  -1   9  -4    4.66    3.97
  -1   9  -4    4.14    3.89
  -1  -9  -4    5.53    4.43
   1  -9   5   61.21    8.74
   1   9   5   57.61   11.07
   1   9   5   69.59    8.18
   1   9   5   74.80    7.26
  -1   9  -5   54.82    6.03
  -1  -9  -5   67.75   11.95
  -1   9  -5   84.08   10.68
  -1  -9  -5   63.51    8.09
   1  -9   6   14.51    4.18
   1   9   6   17.25    5.36
   1   9   6    8.34    6.96
   1   9   6   18.56    5.46
  -1  -9  -6   14.66    8.20
  -1  -9  -6   17.29    5.03
  -1   9  -6   15.47    5.26
  -1   9  -6    3.81    3.45
   1  -9   7   51.10    6.80
   1   9   7   54.15    7.85
   1   9   7   38.23    7.44
  -1   9  -7   44.80    8.14
  -1  -9  -7   57.83    7.50
  -1   9  -7   43.92    6.82
  -1  -9  -7   58.88    9.17
   1   9   8   20.25    4.95
   1   9   8   40.12    6.25
   1  -9   8   23.26    7.14
  -1   9  -8   22.52    8.36
  -1  -9  -8   20.84    4.28
  -1  -9  -8   51.51   10.75
   1  -9   9    4.53    4.27
   1   9   9    7.09    3.59
   1   9   9   -2.16    5.17
  -1  -9  -9    2.55    8.18
  -1   9  -9    7.63    5.38
  -1  -9  -9   -1.71    4.26
   1   9  10   24.81    6.18
   1  -9  10   25.43    7.72
   1   9  10   15.74    7.21
  -1  -9 -10   34.47   10.72
  -1  -9 -10   20.34    5.85
   1  -9  11   10.38    5.60
   1   9  11   17.33    6.07
  -1  -9 -11   31.62    8.00
   1   9  12   11.23    5.97
   1  -9  12   17.82    5.86
  -1  -9 -12   15.74   10.07
   1  -9  13   20.70    6.16
   1   9  13   16.33    4.85
  -1  -9 -13   18.99    8.55
   1  -9  14   13.22    6.61
   1   9  14   16.91    5.05
  -1  -9 -14   24.28   12.42
   1  -9  15   14.45    6.25
   1   9  15    6.93    6.24
  -1  -9 -15   -4.69    8.40
   1  -9  16   20.77    9.76
   1   9  16    6.62    6.83
   1  -9  17    8.18    7.13
   1   9  17   19.65    5.58
   1   9  18    9.37    2.03
   1   9  18    7.52    5.67
   1  -9  18    1.51    7.02
   1  -9  19    9.60    6.69
   1   9  19    0.04    2.68
   1   9  19   10.13    6.99
   1   9  20   -7.27    7.24
   1  -9  20   -0.55    6.54
   1   9  20    2.93    2.58
   1   9  21   -2.58    7.45
   1  -9  21   -3.22    8.83
   1   9  22    6.74    8.87
   1  -9  22   20.21    8.23
   1   9  23    7.29    6.44
   1  -9  23   -0.98    8.08
   1   9  24    9.05    6.70
   1  -9  24    6.67    8.73
   1  -9  25   10.97    9.47
   1   9  25   14.11    7.27
   1   9  26    8.19    9.93
   1  -9  26   10.37    9.08
   1   9  27    1.99    7.67
   1  -9  27   12.70   11.75
   1   9  28  -12.21    9.79
   1  -9  28    9.55    8.34
   1   9  29   11.00    9.09
   1  -9  29    8.29   10.65
   1  -9  30    8.88   10.50
   1   9  30    5.47   11.50
   1   9  31   13.53   10.20
   1  -9  31   23.71   16.36
  -1  10  31   14.42   10.43
  -1 -10  31  -11.22   10.29
  -1  10  30    5.81    8.48
  -1 -10  30    7.08   10.61
  -1  10  29    3.70   11.18
  -1 -10  29   14.83   10.84
  -1 -10  28   -0.98   13.38
  -1  10  28   16.63    8.04
  -1  10  27    9.80   10.05
  -1 -10  27   16.76    9.98
  -1  10  26    4.77    6.58
  -1 -10  26    1.25    8.50
  -1 -10  25    6.65    9.05
  -1  10  25    4.80    8.35
  -1  10  24   27.74    8.85
  -1 -10  24    8.05    9.46
  -1  10  23    6.12    5.15
  -1 -10  23   -7.00    7.85
  -1  10  22    5.39    4.99
  -1 -10  22   -0.08    7.60
  -1 -10  21   -1.45    7.00
  -1  10  21   -0.50    6.48
   1  10 -20   10.54    9.34
  -1  10  20    9.86    2.81
  -1 -10  20   28.99    7.85
  -1  10  20    5.97    7.44
   1  10 -19    6.26   10.63
  -1  10  19   23.88    7.41
  -1 -10  19   36.87    9.19
  -1  10  19   17.61    3.05
   1  10 -18   25.60    8.85
  -1 -10  18    1.72    7.20
  -1  10  18   13.71    4.77
  -1  10  18    5.55    2.52
   1  10 -17    2.55    8.47
  -1  10  17    5.99    2.14
  -1 -10  17   10.02    6.73
  -1  10  17   -1.46    5.93
   1  10 -16   14.67    7.74
  -1 -10  16    7.70    6.26
  -1  10  16   -3.34    3.75
  -1  10  16    3.86    1.45
   1  10 -15   17.30    7.64
  -1 -10  15    4.08    6.31
  -1  10  15    7.60    5.18
   1  10 -14    8.38    6.59
   1 -10 -14    1.71    3.32
  -1 -10  14    2.04    5.36
  -1  10  14   -3.40    4.43
  -1  10  14    8.55    5.67
   1 -10 -13    9.80    4.90
   1  10 -13   18.17    7.78
   1 -10 -13   14.05    6.46
  -1  10  13   11.06    4.55
  -1 -10  13   12.49    6.09
  -1  10  13   12.02    4.95
   1 -10 -12   33.00    9.33
   1 -10 -12   23.24    5.33
   1  10 -12   14.43   11.30
  -1  10  12   28.31    5.24
  -1  10  12   18.84    5.08
  -1 -10  12   22.66    6.76
   1 -10 -11    6.90    3.80
   1  10 -11   -8.41    5.90
   1 -10 -11   18.76    6.74
  -1  10  11    3.38    4.30
  -1 -10  11    3.21    5.23
  -1  10  11   -1.51    2.87
   1 -10 -10    5.18    6.87
   1 -10 -10   -2.48    3.78
   1  10 -10   12.44    6.03
  -1  10  10    2.89    4.32
  -1  10  10    6.21    3.62
  -1 -10  10    4.74    4.85
   1 -10  -9   35.05    8.73
   1  10  -9   43.76   10.63
   1 -10  -9   29.59    5.32
   1 -10  -9   25.39    2.72
  -1 -10   9   33.75    8.70
  -1  10   9   37.58    5.30
  -1  10   9   32.86    5.85
   1 -10  -8   31.27    4.96
   1  10  -8   34.72    7.14
   1 -10  -8   24.31    2.75
   1 -10  -8   29.68    8.41
  -1 -10   8   21.17    5.97
  -1  10   8   30.59    5.16
  -1  10   8   27.92    5.10
   1  10  -7   20.40    6.66
   1 -10  -7   42.67    6.37
   1 -10  -7   20.73    4.85
  -1  10   7   18.85    4.63
  -1  10   7   30.69    4.94
  -1 -10   7   22.16    6.09
   1 -10  -6   61.78    9.74
   1 -10  -6   67.98    6.95
   1  10  -6   62.73    8.56
  -1 -10   6   63.17    7.44
  -1  10   6   53.70    6.31
  -1  10   6   59.58    6.78
   1 -10  -5    2.36    3.46
   1 -10  -5    3.39    2.17
   1 -10  -5    5.28    5.32
   1  10  -5    8.83    4.67
  -1 -10   5    4.25    4.20
  -1  10   5    4.41    3.73
  -1  10   5    5.77    3.21
   1  10  -4   21.89    4.70
   1 -10  -4   27.86    3.64
   1  10  -4   22.55    7.82
   1 -10  -4   27.88    5.42
   1 -10  -4   30.90    6.98
  -1  10   4   29.76    4.36
  -1  10   4   32.37    8.33
  -1 -10   4   34.34    7.69
  -1  10   4   31.27    5.12
   1  10  -3   23.40    5.37
   1 -10  -3   17.59    6.07
   1 -10  -3   19.46    3.33
   1  10  -3   16.79    6.20
   1 -10  -3   18.12    4.65
  -1  10   3   20.86    4.68
  -1  10   3   15.46    6.63
  -1 -10   3   23.76    6.97
  -1 -10   3   13.43    6.41
  -1  10   3   16.44    3.72
   1  10  -2   45.98    7.78
   1 -10  -2   28.27    4.59
   1 -10  -2   31.94    5.01
   1 -10  -2   27.04    5.64
  -1  10   2   33.90    5.60
  -1  10   2   35.47    7.98
  -1 -10   2   31.35    5.74
  -1  10   2   29.62    4.48
  -1 -10   2   44.65    7.58
   1 -10  -1   32.04    4.78
   1 -10  -1   27.23    5.63
   1  10  -1   27.49    4.36
   1  10  -1   37.20    5.61
  -1 -10   1   25.21    5.25
  -1 -10   1   24.44    5.76
  -1  10   1   35.10    7.90
  -1  10   1   30.94    4.71
  -1  10   1   35.55    5.78
   1 -10   0   26.26    6.54
   1  10   0   60.77    7.45
   1  10   0   21.23    4.32
  -1  10   0   25.86    4.92
  -1 -10   0   29.85    5.52
  -1  10   0   34.13    6.00
  -1 -10   0   52.09    7.93
   1 -10   1   23.74    4.44
   1  10   1   24.66    4.20
   1  10   1   28.82    5.39
  -1  10  -1   26.81    4.55
  -1 -10  -1   23.26    4.81
  -1 -10  -1   29.59    5.47
  -1  10  -1   31.09    5.26
   1  10   2   22.84    4.53
   1  10   2   10.61    3.63
   1 -10   2   19.79    4.07
  -1  10  -2   12.15    4.28
  -1 -10  -2   13.35    3.97
  -1  10  -2   13.11    4.31
  -1 -10  -2    8.68    5.15
   1  10   3   31.12    9.04
   1 -10   3   34.97    6.59
   1  10   3   35.05    6.43
   1  10   3   27.01    4.37
  -1 -10  -3   29.46    4.90
  -1  10  -3   40.11    6.90
  -1  10  -3   31.96    4.17
  -1 -10  -3   25.02    3.52
  -1 -10  -3   41.33    9.18
   1 -10   4    2.94    4.81
   1  10   4   11.41    5.01
   1  10   4   15.01    7.18
   1  10   4    2.42    3.23
  -1  10  -4    7.30    4.07
  -1 -10  -4    2.42    3.40
  -1 -10  -4   17.22    6.53
  -1 -10  -4    1.11    1.55
  -1  10  -4    3.53    5.45
  -1  10  -4    2.52    2.78
   1  10   5   48.93    6.15
   1  10   5   65.46   11.01
   1  10   5   65.22    6.83
   1 -10   5   58.91    8.51
  -1  10  -5   42.95    6.78
  -1 -10  -5   65.36    8.85
  -1  10  -5   50.65   10.06
  -1 -10  -5   55.73    6.39
   1 -10   6   26.93    6.49
   1  10   6   14.09    4.35
   1  10   6   17.89    4.48
   1  10   6   16.73    8.38
  -1 -10  -6   31.90    9.24
  -1 -10  -6   16.20    4.29
  -1  10  -6   19.57    5.16
  -1  10  -6   20.08    7.74
   1  10   7   29.26    5.38
   1 -10   7   25.98    7.74
   1  10   7   28.51    6.82
  -1 -10  -7   24.21    6.73
  -1 -10  -7   47.01    8.22
  -1  10  -7   37.11    9.20
   1 -10   8   41.95    6.51
   1  10   8   41.19    7.43
   1  10   8   33.60    5.74
  -1 -10  -8   26.93    5.54
  -1  10  -8   41.22    7.94
  -1 -10  -8   38.36    8.89
  -1  10  -8   40.14    7.73
   1 -10   9    1.71    5.72
   1  10   9    2.06    4.78
   1  10   9    5.99    3.83
  -1 -10  -9   -1.83    7.71
  -1 -10  -9    0.04    3.40
  -1  10  -9    1.52    7.76
   1 -10  10    2.97    6.51
   1  10  10    4.11    3.83
  -1 -10 -10   11.99    6.65
  -1  10 -10    9.27    6.02
   1  10  11   39.57    7.96
   1 -10  11   51.90    7.91
  -1  10 -11   47.56    9.94
  -1 -10 -11   28.28   13.01
   1 -10  12   19.74    8.41
   1  10  12   17.58    4.76
  -1  10 -12   11.60   10.06
  -1 -10 -12   19.49    8.45
   1 -10  13    2.31    5.50
   1  10  13   15.75    5.52
  -1 -10 -13   -4.23    7.32
   1 -10  14    6.14    5.76
   1  10  14    6.71    5.71
  -1 -10 -14    8.05    7.91
   1  10  15    6.40    4.66
   1 -10  15    6.90    6.48
  -1 -10 -15   17.88    8.16
   1 -10  16   17.07    7.35
   1  10  16    6.15    5.17
   1 -10  17   11.31    7.22
   1  10  17    6.76    7.07
   1 -10  18   13.37    8.44
   1  10  18   26.33    8.96
   1 -10  19    9.07    7.65
   1  10  19    3.94    5.48
   1 -10  20  -18.16    7.73
   1  10  20    2.16    5.33
   1  10  21    0.65    5.76
   1 -10  21   24.28   10.59
   1  10  22   -1.27    5.44
   1 -10  22    0.28    7.45
   1  10  23    7.40    7.20
   1 -10  23   27.77    9.22
   1 -10  24    2.22    8.93
   1  10  24   15.14    7.23
   1 -10  25    8.09   10.01
   1  10  25   27.75   10.77
   1 -10  26    7.01   10.30
   1  10  26    5.87    9.55
   1  10  27    2.02    7.06
   1 -10  27   -5.11    8.55
   1 -10  28    9.12   11.22
   1  10  28   14.90    8.49
   1  10  29    7.60   12.21
   1 -10  29   22.34   15.39
   1 -10  30   -2.45   10.90
   1  10  30    8.97    8.48
   1  11 -30  -20.99   14.29
  -1  11  30    2.54   10.72
  -1 -11  30   -8.35   11.13
   1  11 -29   27.27   13.87
  -1  11  29    0.91    7.57
  -1 -11  29    4.34   10.17
   1  11 -28   -5.14   13.87
  -1 -11  28   10.97   10.83
  -1  11  28   19.38   10.11
   1  11 -27   27.64   12.81
  -1 -11  27    1.71    9.78
  -1  11  27   -1.10    8.86
   1  11 -26   20.60   13.43
  -1  11  26   18.91    7.09
  -1 -11  26    5.85   10.44
   1  11 -25   25.10   14.82
  -1 -11  25    5.14   11.49
  -1  11  25   -2.94    8.18
   1  11 -24    4.84   11.03
  -1 -11  24   10.81    8.74
  -1  11  24    0.36    7.18
   1  11 -23    8.59   10.51
  -1  11  23    2.66    5.60
  -1 -11  23    5.24    8.06
   1  11 -22   -6.41   14.30
  -1  11  22   -7.66    5.53
  -1 -11  22   -2.58    8.03
   1  11 -21   12.48    9.16
  -1  11  21   -3.96    4.82
  -1 -11  21   -3.30    7.43
   1  11 -20   12.24    9.35
  -1  11  20    6.35    4.82
  -1 -11  20   -2.86    7.53
   1  11 -19   12.49   14.06
  -1  11  19   18.14    5.16
  -1 -11  19   11.51   10.45
   1  11 -18    3.74    9.89
  -1 -11  18   20.96    7.80
  -1  11  18    9.04    6.61
   1  11 -17   13.19    7.84
  -1 -11  17    6.88    6.75
  -1  11  17   -3.76    5.52
   1  11 -16   23.26    9.68
  -1 -11  16   26.22    7.52
  -1  11  16    8.73    6.27
   1  11 -15   24.86    8.95
  -1 -11  15   12.78    7.18
  -1  11  15   11.89    5.54
   1  11 -14   11.41    8.12
   1 -11 -14   12.17    6.80
  -1 -11  14   22.01    6.90
  -1  11  14    8.95    5.16
   1  11 -13    5.07    6.87
   1 -11 -13    0.74    7.58
   1 -11 -13    2.83    4.72
  -1 -11  13    6.76    5.93
  -1  11  13    3.99    5.13
  -1  11  13    0.27    4.49
   1  11 -12    0.33    7.08
   1 -11 -12    5.00    4.65
   1 -11 -12    5.76    7.81
  -1 -11  12   16.45    6.29
  -1  11  12   13.67    5.56
  -1  11  12    8.95    4.65
   1 -11 -11   61.70   10.68
   1  11 -11   34.33   11.67
   1 -11 -11   27.59    6.20
  -1  11  11   22.20    6.56
  -1 -11  11   36.77   10.07
  -1  11  11   33.17    5.74
   1 -11 -10    7.37    4.31
   1 -11 -10    4.15    7.50
   1  11 -10   15.47    8.74
  -1  11  10    1.68    4.40
  -1 -11  10    9.86    7.13
  -1  11  10   -1.57    4.12
   1 -11  -9   29.76    5.53
   1 -11  -9   31.93    8.80
   1  11  -9   26.65    8.05
  -1  11   9   30.76    5.39
  -1  11   9   18.12    5.15
  -1 -11   9   36.27    6.62
   1 -11  -8   19.06    6.03
   1 -11  -8   10.22    2.41
   1 -11  -8   14.66    4.69
   1  11  -8   16.44    6.29
  -1  11   8   21.15    4.78
  -1  11   8   20.90    4.48
  -1 -11   8    9.02    5.53
   1 -11  -7   46.26    8.94
   1 -11  -7   31.02    5.58
   1 -11  -7   29.07    3.22
   1  11  -7   32.45    7.28
  -1  11   7   25.19    5.18
  -1 -11   7   48.44    6.66
  -1  11   7   30.27    5.55
   1 -11  -6   30.30    4.77
   1  11  -6    8.91    6.00
   1 -11  -6   13.96    2.72
   1 -11  -6   29.77    7.57
  -1 -11   6   15.69    5.39
  -1  11   6   20.73    4.97
  -1  11   6   12.53    4.44
   1 -11  -5   19.60    5.23
   1 -11  -5   25.55    3.72
   1  11  -5   21.51    6.09
   1 -11  -5   26.40    7.45
  -1 -11   5   17.05    5.36
  -1  11   5   22.67    5.23
  -1  11   5   20.27    4.31
   1 -11  -4    0.79    4.93
   1 -11  -4   -0.28    2.82
   1  11  -4    6.82    5.68
   1 -11  -4   -0.68    3.66
  -1  11   4   -1.40    5.96
  -1  11   4   -0.58    3.62
  -1  11   4    1.44    2.91
  -1 -11   4   -1.76    3.99
   1 -11  -3    1.14    4.43
   1 -11  -3    0.86    3.19
   1  11  -3    8.21    3.85
   1 -11  -3    2.30    3.88
  -1  11   3   -0.57    4.00
  -1 -11   3    0.44    3.85
  -1  11   3    2.94    5.97
  -1  11   3   -0.95    3.09
   1 -11  -2   -0.80    4.73
   1 -11  -2    3.03    4.09
   1 -11  -2   -0.99    3.18
   1  11  -2   -4.27    3.96
  -1  11   2   10.23    7.89
  -1  11   2    0.54    2.38
  -1 -11   2    5.93    5.59
  -1  11   2    5.77    4.06
   1  11  -1   12.04    4.38
   1 -11  -1   13.23    3.96
   1 -11  -1    2.65    4.86
   1  11  -1    8.18    3.46
  -1  11   1    5.85    6.41
  -1  11   1   14.05    4.70
  -1  11   1    7.56    3.87
  -1 -11   1    3.78    6.48
  -1 -11   1    5.47    4.49
   1 -11   0   16.81    5.46
   1  11   0    5.64    4.37
   1  11   0    6.17    4.59
  -1  11   0   12.92    3.68
  -1  11   0    0.09    9.02
  -1 -11   0   11.42    4.92
  -1 -11   0    5.75    5.22
  -1  11   0    7.24    3.03
   1 -11   1    2.40    3.37
   1  11   1    2.34    3.07
   1  11   1    4.06    5.23
  -1  11  -1    0.98    3.60
  -1  11  -1    3.67    3.38
  -1 -11  -1   -1.40    4.28
  -1 -11  -1    1.29    4.89
   1  11   2    8.37    5.32
   1  11   2    0.68    2.98
   1  11   2   -1.72    7.30
   1 -11   2    7.61    4.59
  -1  11  -2   -6.46    4.73
  -1  11  -2    4.84    3.83
  -1 -11  -2    4.37    5.91
  -1 -11  -2   -0.18    3.70
   1  11   3    1.44    6.57
   1 -11   3   -4.69    3.35
   1  11   3   -2.47    3.50
   1  11   3    4.57    4.12
  -1  11  -3   -0.95    3.69
  -1 -11  -3    0.38    4.32
  -1  11  -3    0.85    3.85
  -1 -11  -3   -0.05    2.62
  -1 -11  -3    0.53    4.98
   1  11   4   34.20    6.64
   1  11   4   24.93    8.64
   1  11   4   22.33    5.76
   1 -11   4   26.91    4.78
  -1  11  -4   28.66    7.29
  -1  11  -4   16.02    4.00
  -1 -11  -4   57.09    9.55
  -1 -11  -4   16.83    2.37
  -1 -11  -4   19.05    6.45
  -1  11  -4   20.12    5.79
   1  11   5    9.19    7.95
   1  11   5   24.35    4.93
   1  11   5   12.59    4.13
   1 -11   5   18.32    6.45
  -1 -11  -5   27.83    6.32
  -1 -11  -5   11.67    1.17
  -1  11  -5    7.66    7.02
  -1 -11  -5   14.39    4.43
   1  11   6   19.72    6.39
   1  11   6   38.00    7.15
   1 -11   6   47.32    8.01
   1  11   6   25.28    9.95
  -1  11  -6   39.06    9.46
  -1 -11  -6   26.96    7.11
  -1 -11  -6   28.21    7.89
   1  11   7   36.51    6.88
   1 -11   7   26.18    7.70
  -1  11  -7   17.08    9.15
  -1 -11  -7   29.17   10.29
   1 -11   8   23.33    5.94
   1  11   8   25.06    6.72
  -1  11  -8   12.98    6.99
  -1 -11  -8   35.93   11.10
   1 -11   9   10.90    5.53
   1  11   9   16.23    5.88
  -1  11  -9   10.18    6.23
  -1 -11  -9    5.96   10.15
   1 -11  10   43.71    7.41
   1  11  10   29.92    5.73
  -1 -11 -10   20.70    9.51
  -1  11 -10   52.57    8.89
   1  11  11   11.81    6.03
   1 -11  11    9.64    5.58
  -1 -11 -11   12.63   10.93
  -1  11 -11   13.11    7.30
   1  11  12    4.99    4.33
   1 -11  12   10.29    5.36
  -1 -11 -12   14.33   10.92
  -1  11 -12    6.61    9.67
   1  11  13   12.99    5.09
   1 -11  13   13.69    6.89
  -1  11 -13   19.20    8.52
  -1 -11 -13   24.85    9.06
   1 -11  14   17.54    7.02
  -1  11 -14   14.79    9.12
  -1 -11 -14   32.29    9.33
   1  11  15    7.57    4.98
   1 -11  15   10.69    9.57
  -1 -11 -15    9.37   12.12
  -1  11 -15   20.55   11.72
   1  11  16    4.65    6.34
   1 -11  16   -7.10    6.66
  -1 -11 -16    2.64    7.95
  -1  11 -16   11.13    7.55
   1 -11  17   19.76    8.07
   1  11  17   14.11    5.67
   1 -11  18   20.59    8.23
   1  11  18    8.72    8.06
   1 -11  19   14.67   10.71
   1  11  19   12.26    6.09
   1 -11  20    2.47    7.76
   1  11  20    9.00    5.99
   1 -11  21   -1.91    7.72
   1  11  21    4.64    5.73
   1  11  22   -7.60    6.00
   1 -11  22   -0.54   10.78
   1  11  23    1.58    6.17
   1 -11  23    0.70    8.19
   1  11  24    4.54    6.39
   1 -11  24   -2.46    8.41
   1  11  25    0.35    6.49
   1 -11  25   -7.02    8.71
   1 -11  26    9.21   10.43
   1  11  26    9.33   10.15
   1 -11  27    4.23    9.48
   1  11  27   -1.79    9.00
   1 -11  28   -7.81   11.12
   1  11  28   -5.79    8.44
   1 -11  29    4.96   10.60
   1  11  29    4.34   11.39
   1  12 -29    9.09   23.17
  -1 -12  29   35.94   17.98
   1  12 -28    7.37   19.26
  -1 -12  28    5.84   11.05
   1  12 -27    5.48   12.90
  -1  12  27   10.55    6.54
  -1 -12  27  -11.38    9.89
   1  12 -26   -0.81   11.44
  -1  12  26    7.28    8.18
  -1 -12  26   -5.78    9.28
   1  12 -25    4.04   12.03
  -1 -12  25   -1.83    9.49
  -1  12  25   12.30    8.11
   1  12 -24   14.14   17.09
  -1  12  24    8.42    6.21
  -1 -12  24   14.16   12.60
   1  12 -23   16.77   11.31
  -1 -12  23   14.25    8.85
  -1  12  23   -0.25    5.61
   1  12 -22   -8.97   14.33
  -1 -12  22   -2.64   10.62
  -1  12  22    8.09    7.05
   1  12 -21   34.76   12.43
  -1  12  21   12.37    8.45
  -1 -12  21    8.36    9.88
   1  12 -20  -15.50    9.30
  -1  12  20   -5.43    4.68
  -1 -12  20   19.43    7.31
   1  12 -19   15.75   14.36
  -1  12  19   14.66    6.84
  -1 -12  19    8.87   10.17
   1  12 -18   37.06   12.77
  -1  12  18   35.83    8.78
  -1 -12  18   31.87   10.14
   1  12 -17   22.29   11.78
  -1  12  17   32.79    6.26
  -1 -12  17   44.44    9.83
   1  12 -16    7.60    9.25
  -1 -12  16   21.12    7.64
  -1  12  16   10.07    6.33
   1  12 -15   22.79   11.90
  -1  12  15   12.24    5.99
  -1 -12  15   17.40    9.74
   1  12 -14   27.39    8.75
   1 -12 -14   27.15    9.91
  -1 -12  14    9.89    7.12
  -1  12  14    8.09    5.49
   1 -12 -13    8.92    6.49
   1  12 -13   12.03   10.85
  -1 -12  13   12.48    6.45
  -1  12  13    6.94    5.02
   1 -12 -12    8.42    4.12
   1  12 -12   15.03    8.07
   1 -12 -12   16.03    8.35
  -1  12  12   16.21    5.32
  -1 -12  12   10.22    6.26
  -1  12  12    3.19    5.55
   1 -12 -11    5.49    5.06
   1  12 -11   20.58    7.49
   1 -12 -11   14.47    8.74
  -1  12  11   10.87    4.79
  -1  12  11    6.22    4.69
  -1 -12  11   11.50    6.42
   1 -12 -10   34.91    9.79
   1 -12 -10   26.55    6.31
   1  12 -10   27.47    8.26
  -1  12  10   42.11    6.08
  -1  12  10   27.37    6.19
  -1 -12  10   40.18    7.35
   1  12  -9   17.57    7.59
   1 -12  -9   18.42    2.34
   1 -12  -9   15.18    5.66
   1 -12  -9   20.70    9.00
  -1  12   9   21.43    5.26
  -1 -12   9   45.36    7.15
  -1  12   9   38.90    5.62
   1 -12  -8   27.32    8.40
   1  12  -8   21.33    8.86
   1 -12  -8   20.41    5.23
   1 -12  -8   10.28    2.37
  -1 -12   8   19.82    8.54
  -1  12   8   24.99    4.88
  -1  12   8   16.01    4.58
   1  12  -7   11.12    6.15
   1 -12  -7   14.14    2.96
   1 -12  -7   12.55    5.04
   1 -12  -7   29.29    8.21
  -1  12   7    7.89    4.42
  -1 -12   7   37.97    5.83
  -1  12   7   20.78    5.26
   1 -12  -6    4.54    6.54
   1 -12  -6    6.94    4.54
   1  12  -6    5.92    5.34
  -1  12   6    8.09    4.46
  -1 -12   6   11.03    5.04
  -1  12   6    5.37    3.85
   1 -12  -5    3.22    2.50
   1 -12  -5    8.29    6.10
   1 -12  -5    5.61    4.53
   1  12  -5   -0.39    5.23
  -1 -12   5   12.05    6.51
  -1  12   5    3.28    3.73
  -1  12   5   10.89    4.61
   1 -12  -4   51.97    9.33
   1 -12  -4   34.62    4.80
   1  12  -4   40.08    6.95
   1 -12  -4   39.15    6.64
  -1 -12   4   42.20    7.46
  -1  12   4   42.85   12.69
  -1  12   4   40.73    6.91
  -1  12   4   39.54    5.83
   1 -12  -3   16.89    7.96
   1  12  -3   49.32    8.94
   1 -12  -3   27.70    4.22
   1 -12  -3   30.39    6.41
  -1  12   3   27.62    6.54
  -1  12   3   13.65    4.74
  -1 -12   3   42.15    8.23
  -1  12   3   26.13    8.28
   1 -12  -2   16.27    4.92
   1 -12  -2   14.72    4.26
   1  12  -2   20.71    5.60
   1 -12  -2   13.80    3.91
  -1  12   2   16.65    8.59
  -1 -12   2   41.59    6.11
  -1  12   2   13.51    4.28
  -1  12   2   19.67    5.64
   1  12  -1    8.78    6.21
   1 -12  -1    7.40    4.44
   1 -12  -1   -0.25    3.78
  -1  12   1    6.33    6.97
  -1 -12   1    7.54    6.35
  -1  12   1    2.43    2.88
  -1  12   1    8.91    5.16
   1  12   0   10.46    5.94
   1 -12   0    8.01    5.95
  -1  12   0    8.19    5.28
  -1  12   0    6.23    4.27
  -1  12   0   10.70    7.25
  -1 -12   0    7.34    7.40
   1  12   1   26.91    6.97
   1 -12   1   24.42    7.23
  -1  12  -1   16.37    6.60
  -1  12  -1   16.35    3.86
  -1 -12  -1   22.77    8.27
   1  12   2   18.69   13.83
   1  12   2   37.90    8.16
   1 -12   2   27.45    7.33
  -1 -12  -2   40.64    8.90
  -1  12  -2   35.57    7.52
   1  12   3   40.27    6.26
   1  12   3   56.19   11.04
   1 -12   3   31.98    8.08
  -1  12  -3   27.87    5.23
  -1 -12  -3   26.18    3.36
  -1  12  -3   50.41    8.37
  -1 -12  -3   47.82   10.53
   1  12   4    0.30    7.64
   1 -12   4    7.33    5.53
   1  12   4    4.02    4.31
  -1 -12  -4   -4.43    5.45
  -1  12  -4   10.74    4.53
   1 -12   5    8.55    5.68
   1  12   5    4.90    4.18
   1  12   5    2.32    7.52
  -1  12  -5    2.85    6.32
  -1 -12  -5    2.38    6.10
  -1 -12  -5    2.97    1.18
   1  12   6   23.35    7.03
   1  12   6   17.16   12.64
   1 -12   6   28.97    7.73
  -1 -12  -6   34.00    8.09
  -1  12  -6   20.61    8.82
   1  12   7   27.71    5.61
   1 -12   7   25.22    7.38
  -1  12  -7   36.28    8.90
  -1 -12  -7   19.70    8.35
   1 -12   8   35.22    6.51
   1  12   8   28.93    5.70
  -1  12  -8   16.38    7.99
  -1 -12  -8   31.12   11.81
   1  12   9   30.44    7.63
   1 -12   9   37.84    9.90
  -1 -12  -9   28.30   12.99
  -1  12  -9   39.01    8.53
   1  12  10   23.25    6.91
   1 -12  10   15.34    8.06
  -1  12 -10   10.55    7.64
  -1 -12 -10    7.37    8.06
   1 -12  11   13.25    6.33
   1  12  11   22.47    6.43
  -1  12 -11    7.20    7.75
  -1 -12 -11   12.91   11.37
   1 -12  12   13.59    6.78
   1  12  12   19.13    5.14
  -1 -12 -12   25.13    9.91
  -1  12 -12   11.35    8.39
   1 -12  13    8.35    8.77
   1  12  13   11.02    4.75
  -1  12 -13   11.73    8.53
  -1 -12 -13   12.37    8.43
   1  12  14   17.73    5.39
   1 -12  14   13.66    9.31
  -1 -12 -14   15.61    9.60
  -1  12 -14   21.76   12.96
   1 -12  15   11.95    7.33
   1  12  15   12.43    5.42
  -1  12 -15   29.70    9.44
  -1 -12 -15    5.22   12.99
   1 -12  16   42.22    9.59
   1  12  16   21.56    9.21
  -1 -12 -16   27.24   14.55
  -1  12 -16   23.64   11.15
   1 -12  17   41.03   11.38
   1  12  17   46.94    7.69
  -1  12 -17   20.19   12.81
   1  12  18    1.62    7.38
   1 -12  18    9.30   10.81
  -1  12 -18   22.17   13.43
   1  12  19   21.79    6.67
   1 -12  19   10.37    9.16
  -1  12 -19   26.58   11.67
   1 -12  20   19.40    9.17
   1  12  20   16.18    7.06
  -1  12 -20   15.56   12.04
   1 -12  21   14.57    9.00
   1  12  21   -1.45    8.10
  -1  12 -21   14.13   11.16
   1  12  22    4.34    9.01
   1 -12  22   19.79   12.88
   1  12  23    1.93    9.66
   1 -12  23   22.72    8.98
   1  12  24   -2.95    9.07
   1 -12  24   20.70   10.26
   1 -12  25   12.88   10.59
   1  12  25    6.19    7.16
   1 -12  26    5.38   10.38
   1  12  26    4.48    7.25
   1 -12  27   10.90   14.51
   1  12  27    3.68   10.55
   1  12  28   -1.45   10.44
   1 -12  28   20.96   15.28
   1  13 -27   19.38   17.35
  -1 -13  27   -0.94   10.39
   1  13 -26    1.74   13.17
  -1 -13  26   11.66   10.22
   1  13 -25    1.17   12.59
  -1 -13  25    7.58    9.31
   1  13 -24   19.82   12.16
  -1  13  24    2.19    7.48
  -1 -13  24   -4.75    9.29
   1  13 -23   12.93   13.74
  -1 -13  23   27.77   10.28
  -1  13  23    8.85    8.24
   1  13 -22   12.18   11.96
  -1 -13  22   13.81    9.13
  -1  13  22    5.73    7.78
   1  13 -21    9.20   10.23
  -1  13  21    3.17    6.79
  -1 -13  21    4.44    8.07
   1  13 -20   -1.04   10.09
  -1 -13  20   -1.71   11.32
  -1  13  20   17.92    6.87
   1  13 -19    8.68   12.65
  -1  13  19    0.33    4.13
  -1 -13  19    2.64   10.35
   1  13 -18   -0.99    9.07
  -1  13  18    3.77    5.65
  -1 -13  18   -2.01    7.38
   1  13 -17    0.58    8.74
  -1 -13  17    2.07    7.42
  -1  13  17    3.03    5.43
   1  13 -16   -2.18   10.58
  -1 -13  16    4.50    8.91
  -1  13  16    0.03    4.86
   1  13 -15    8.61    9.12
  -1 -13  15    8.47   10.15
  -1  13  15   10.98    5.52
   1 -13 -14   -5.16    9.46
   1  13 -14   22.57    8.96
  -1  13  14    9.63    5.44
  -1 -13  14   14.76    7.18
   1 -13 -13   -1.11    8.47
   1  13 -13   -0.99   10.99
  -1 -13  13   19.26    8.55
  -1  13  13    4.33    4.89
   1 -13 -12    2.49    8.50
   1  13 -12    4.37    7.63
  -1  13  12    2.89    4.88
  -1 -13  12   28.47    6.68
   1 -13 -11   19.33    8.79
   1  13 -11    8.91    7.54
  -1 -13  11   14.95    6.75
  -1  13  11    6.78    5.01
   1 -13 -10   16.35    7.93
   1  13 -10   -1.95    7.05
  -1 -13  10    4.54    6.13
  -1  13  10   11.16    4.60
   1 -13  -9   13.58    7.01
   1  13  -9    4.89    6.22
   1 -13  -9   -1.32    4.78
  -1  13   9    3.70    4.11
  -1 -13   9    1.34    5.46
  -1  13   9    0.74    4.01
   1 -13  -8   14.30    7.92
   1 -13  -8    6.67    2.22
   1 -13  -8   14.59    5.27
   1  13  -8   12.39    9.14
  -1 -13   8   20.01    8.48
  -1  13   8    6.36    4.61
  -1  13   8   18.85    3.84
   1 -13  -7   -0.13    6.66
   1  13  -7   -1.49    5.37
   1 -13  -7    0.12    4.49
   1 -13  -7   -0.28    2.26
  -1 -13   7    1.10    5.09
  -1  13   7    3.01    3.69
  -1  13   7    5.24    4.53
   1  13  -6   -5.08    7.16
   1 -13  -6    7.33    6.49
   1 -13  -6    0.84    2.77
   1 -13  -6    2.31    4.86
  -1  13   6    1.12    3.83
  -1 -13   6   -5.33    6.91
  -1  13   6    6.35    3.33
   1  13  -5    5.11    7.03
   1 -13  -5    2.45    4.58
   1 -13  -5    2.84    2.55
   1 -13  -5    0.37    4.68
  -1  13   5    5.69    4.42
  -1 -13   5    5.89    7.41
  -1  13   5    2.72    4.03
   1 -13  -4   15.34    4.82
   1 -13  -4   18.95    6.27
   1  13  -4   44.76    8.96
   1 -13  -4   19.76    8.22
  -1  13   4   17.44    5.12
  -1  13   4   28.28    9.06
  -1 -13   4   29.48    8.63
  -1  13   4   31.27    6.06
   1 -13  -3    4.01    3.51
   1 -13  -3    5.20    5.36
   1  13  -3    6.49    7.12
   1 -13  -3   -0.41    6.71
  -1  13   3    8.08    7.58
  -1  13   3    6.45    4.17
  -1 -13   3    6.07    7.08
  -1  13   3    9.83    4.94
   1 -13  -2   -3.23    5.62
   1  13  -2   -0.29    4.50
   1 -13  -2    5.55    3.23
  -1  13   2    4.84    6.75
  -1 -13   2   -0.47    4.67
  -1  13   2   -2.63    3.99
  -1  13   2    5.33    4.70
   1 -13  -1    0.03    3.97
   1  13  -1   13.22    6.62
   1 -13  -1    7.84    6.07
  -1 -13   1    7.40    6.87
  -1  13   1    2.81    3.20
  -1  13   1    4.27    7.51
  -1  13   1    9.53    5.40
   1  13   0    3.54    5.92
   1 -13   0    0.80    5.37
  -1  13   0    1.97    4.09
  -1  13   0    6.22    5.23
  -1 -13   0   -2.15    5.25
  -1  13   0    5.02    6.89
   1  13   1   16.66   10.65
   1 -13   1   -1.64    5.64
   1  13   1   -4.25    4.20
  -1 -13  -1    2.99    5.14
  -1  13  -1   -2.77    5.19
  -1  13  -1    1.40    6.86
   1  13   2   16.59    8.24
   1 -13   2   -7.76    5.52
   1  13   2    7.44    4.61
  -1 -13  -2    8.68    7.19
  -1 -13  -2   -0.26    2.94
  -1  13  -2    3.06    5.84
   1 -13   3   26.79    7.45
   1  13   3   11.56   10.53
   1  13   3   38.22    7.88
  -1 -13  -3   29.18    9.62
  -1 -13  -3   14.48    3.63
  -1  13  -3   27.57    5.85
   1  13   4    5.20    5.73
   1  13   4   -5.52    7.46
   1 -13   4    3.24    6.06
  -1 -13  -4    0.98    1.99
  -1  13  -4    7.25    6.27
  -1 -13  -4    3.55    7.63
   1 -13   5    4.36    4.25
   1  13   5    2.78    5.62
   1  13   5   16.17    7.68
  -1 -13  -5    0.64    1.10
  -1  13  -5    3.38    5.04
  -1 -13  -5   -1.33    7.96
   1  13   6    0.18    5.53
   1  13   6   -3.93    8.08
   1 -13   6    4.42    4.68
  -1  13  -6    3.01    5.17
  -1 -13  -6    5.33    8.69
   1  13   7   26.99    5.40
   1 -13   7   15.93    6.20
  -1  13  -7   15.38    9.34
  -1 -13  -7   11.71    7.95
   1  13   8   -0.54    4.08
   1 -13   8   -4.30    6.33
  -1 -13  -8    4.96    8.85
  -1  13  -8    1.23    5.50
   1  13   9   -3.28    5.41
   1 -13   9    7.85    6.87
  -1 -13  -9    8.90    9.33
  -1  13  -9  -10.15    8.86
   1 -13  10    8.15    8.19
   1  13  10   17.21    6.65
  -1  13 -10   13.11    9.93
  -1 -13 -10    5.94   10.72
   1  13  11   10.21    4.85
   1 -13  11   11.00    7.95
  -1  13 -11    1.60   10.14
  -1 -13 -11   11.87    7.96
   1  13  12    8.21    5.76
   1 -13  12    0.40    6.08
  -1 -13 -12    0.21    9.85
  -1  13 -12   -7.19    6.92
   1 -13  13    6.11    6.86
   1  13  13    6.73    6.73
  -1  13 -13   15.26   11.07
  -1 -13 -13   22.52   11.81
   1 -13  14   11.51    6.87
   1  13  14    7.23    6.45
  -1 -13 -14    4.23    8.81
  -1  13 -14    8.08    8.41
   1 -13  15    0.57    6.55
   1  13  15   -4.18    4.52
  -1  13 -15   25.58    8.39
   1  13  16    8.19    5.18
   1 -13  16    4.04    7.41
  -1 -13 -16    6.80   12.34
  -1  13 -16   15.85    9.46
   1 -13  17   12.13    7.74
   1  13  17    4.60    7.31
  -1  13 -17   19.12    9.94
   1  13  18    9.00    5.42
   1 -13  18    1.33    7.84
  -1  13 -18   17.50   10.06
   1  13  19   11.74    5.13
   1 -13  19   -2.14    8.10
  -1  13 -19   -9.81    9.74
   1 -13  20   16.77   12.13
   1  13  20   15.10    9.12
  -1  13 -20   12.00   15.55
   1  13  21    3.34    7.85
   1 -13  21    9.89    8.55
  -1  13 -21   -3.72   10.65
   1  13  22    0.32    8.05
   1 -13  22    4.54   10.83
  -1  13 -22  -10.46   14.46
   1 -13  23    0.00    9.47
   1  13  23   12.04    8.67
  -1  13 -23    0.54   11.64
   1  13  24   10.08    8.75
   1 -13  24   -3.49    9.68
  -1  13 -24    2.91   12.35
   1 -13  25    7.00    9.53
   1  13  25   -4.70    8.51
  -1  13 -25   -3.49   15.11
   1  13  26   13.79   10.72
   1 -13  26   11.92   16.16
  -1  13 -26   24.56   19.75
   1  14 -26   15.00   13.49
  -1 -14  26    3.06   10.53
   1  14 -25   20.82   14.58
  -1 -14  25   16.97   11.30
   1  14 -24    3.73   13.58
  -1 -14  24   14.88   10.44
   1  14 -23   13.69   20.31
  -1 -14  23   34.35   15.40
   1  14 -22   25.92   15.40
  -1 -14  22   38.00   12.12
   1  14 -21    0.18   11.63
  -1 -14  21   19.75    9.64
   1  14 -20   16.24   14.40
  -1 -14  20   -0.91   11.23
  -1  14  20    5.02    6.69
   1  14 -19   -3.25   13.94
  -1 -14  19    9.78    8.30
  -1  14  19    5.07    6.20
   1  14 -18  -10.84    9.44
  -1 -14  18    6.36    7.68
  -1  14  18    4.57    5.69
   1  14 -17   -8.09    8.58
  -1 -14  17    3.36    7.28
  -1  14  17    0.63    5.01
   1  14 -16   -2.14   11.26
  -1  14  16   -0.21    4.78
  -1 -14  16    0.24    8.65
   1  14 -15   24.65    8.85
   1 -14 -15    6.34    6.75
  -1  14  15   -4.01    4.00
  -1 -14  15   -0.41    6.71
   1  14 -14   28.82   10.47
   1 -14 -14   23.65   11.60
  -1  14  14   18.38    5.05
  -1 -14  14   36.35    8.96
   1  14 -13   36.30   13.65
   1 -14 -13   21.71   11.36
  -1  14  13   27.41    6.93
  -1 -14  13    9.93   11.50
   1  14 -12   11.29    7.96
   1 -14 -12    5.94    9.86
  -1  14  12    9.28    5.46
  -1 -14  12   18.85    7.22
   1 -14 -11   -5.73    8.27
   1  14 -11    3.34    6.71
  -1 -14  11    6.94    6.02
  -1  14  11    1.79    4.47
   1 -14 -10   10.54    7.75
   1  14 -10    9.33    6.73
  -1  14  10   -1.53    4.39
  -1 -14  10   10.45    6.10
   1  14  -9   25.70    7.22
   1 -14  -9   20.11    6.79
  -1  14   9    9.16    4.92
  -1 -14   9   15.98    6.94
   1 -14  -8   14.07    9.50
   1  14  -8    8.83   10.15
  -1 -14   8   25.88    7.40
  -1  14   8   19.21    5.81
   1 -14  -7    8.06    7.61
   1  14  -7    4.25    5.79
  -1  14   7    2.07    4.71
  -1 -14   7    7.45    8.20
   1  14  -6    9.67    8.14
   1 -14  -6    8.13    7.91
  -1  14   6   13.60    5.20
  -1 -14   6    3.31    5.95
   1 -14  -5   12.10    7.39
   1  14  -5   12.52    6.03
  -1 -14   5   13.50    6.35
  -1  14   5   10.39    5.43
   1  14  -4   14.40    6.07
   1 -14  -4    6.07    7.73
  -1  14   4    5.07    5.23
  -1 -14   4    5.39    5.82
  -1  14   4    9.70    5.54
   1 -14  -3   11.51    4.59
   1 -14  -3   10.39    8.48
   1  14  -3   24.67    6.41
  -1 -14   3   22.70    7.25
  -1  14   3   39.98    6.61
  -1  14   3   17.40    8.79
   1 -14  -2   16.35    4.81
   1  14  -2   20.61    8.50
   1 -14  -2    7.14    7.92
  -1 -14   2   14.79    6.72
  -1  14   2   27.21    8.84
  -1  14   2   21.97    6.62
   1 -14  -1   -3.67    6.21
   1  14  -1    4.62    6.46
  -1  14   1   -3.18    7.35
  -1 -14   1   -1.25    7.50
  -1  14   1   -4.43    5.36
   1  14   0    5.30    4.74
   1  14   0   10.74    8.53
   1 -14   0   -4.00    6.32
   1 -14   0    0.28    4.36
  -1 -14   0   -0.10    5.42
  -1  14   0   -3.92    5.30
  -1  14   0   -1.21    7.06
   1  14   1   34.04   11.55
   1 -14   1   18.34    5.90
   1  14   1   33.99    8.63
  -1  14  -1   18.68    7.49
  -1 -14  -1   26.36    9.56
  -1  14  -1   20.59   13.08
   1  14   2   14.98   10.34
   1  14   2   15.87    5.80
   1 -14   2   22.50    7.99
  -1 -14  -2    5.15    7.65
  -1  14  -2   21.76    7.34
  -1  14  -2   16.96   12.95
   1 -14   3   15.14    7.03
   1  14   3    4.88   10.04
   1  14   3    6.42    5.48
  -1 -14  -3   11.70    9.82
  -1  14  -3   15.55    5.21
   1  14   4   19.16    7.58
   1  14   4   15.14    9.67
   1 -14   4   14.74    7.34
  -1  14  -4   -2.09    7.55
  -1 -14  -4   18.81    9.78
   1  14   5    0.88    5.78
   1  14   5    2.41    8.27
   1 -14   5   -0.13    6.07
  -1 -14  -5    5.30    6.36
  -1  14  -5   -0.26    6.38
   1  14   6   -0.81    8.69
   1 -14   6    5.60    6.62
   1  14   6    5.86    4.15
  -1 -14  -6    1.12    9.44
  -1  14  -6   -2.20    7.06
   1 -14   7   10.89    7.76
   1  14   7   22.73    7.01
  -1 -14  -7    6.88   10.36
  -1  14  -7    7.33    6.79
   1  14   8    7.04    5.04
   1 -14   8   14.21    7.78
  -1  14  -8    5.19    8.62
  -1 -14  -8   22.15   11.05
   1  14   9    9.34    5.97
   1 -14   9    4.47    5.89
  -1 -14  -9    7.18   10.02
  -1  14  -9    2.29    6.35
   1 -14  10    1.08    5.54
   1  14  10   10.78    5.73
  -1 -14 -10    4.70    9.90
  -1  14 -10  -10.44    6.31
   1  14  11   15.13    5.57
   1 -14  11   15.35    6.83
  -1 -14 -11   29.70   12.56
  -1  14 -11   12.64    8.63
   1 -14  12   14.07   10.35
   1  14  12   10.76    5.80
  -1  14 -12   14.24   12.71
  -1 -14 -12   38.24   10.43
   1  14  13   26.75    6.63
   1 -14  13   53.46    9.04
  -1  14 -13   34.06   11.23
  -1 -14 -13   16.89   11.68
   1  14  14    2.24    5.05
   1 -14  14    7.77    9.52
  -1  14 -14    7.97   11.68
  -1 -14 -14   17.69   12.08
   1  14  15   -8.57    6.11
   1 -14  15    3.46    6.92
  -1  14 -15    4.29    8.83
  -1 -14 -15   -5.72   11.65
   1 -14  16    1.60    6.81
   1  14  16    4.55    6.48
  -1 -14 -16   14.42   12.75
  -1  14 -16   -1.58    8.81
   1 -14  17   -6.86    7.24
   1  14  17    4.52    4.96
  -1 -14 -17    8.99    9.19
  -1  14 -17   -3.85    8.55
   1  14  18    8.44    6.81
   1 -14  18  -12.67    7.59
  -1  14 -18    8.17    9.42
   1 -14  19   10.88   10.63
   1  14  19    0.19    7.31
  -1  14 -19   -2.33   13.64
   1  14  20    9.82    6.12
   1 -14  20    3.87    8.94
  -1  14 -20   25.20   12.32
   1  14  21   19.59    9.72
   1 -14  21    9.23   10.50
  -1  14 -21   33.53   14.51
   1 -14  22   22.79   14.61
   1  14  22   13.79    9.55
  -1  14 -22   11.98   18.61
   1  14  23   13.52   10.18
   1 -14  23   22.79   10.76
  -1  14 -23   20.49   14.88
   1 -14  24    8.92    9.99
   1  14  24    1.30    9.16
  -1  14 -24    6.99   13.12
   1 -14  25    3.38   12.76
  -1  14 -25  -10.59   17.40
   1  15 -24    7.01   12.77
  -1 -15  24    4.35   10.23
   1  15 -23   -1.00   15.37
  -1 -15  23   -0.11   12.44
   1  15 -22   10.80   13.37
  -1 -15  22   16.75   10.39
   1  15 -21    3.07   12.31
  -1 -15  21   21.19   10.03
   1  15 -20    1.78   13.45
  -1 -15  20   -3.22   10.92
   1  15 -19   10.88   12.39
  -1 -15  19   27.57    9.94
   1  15 -18    4.03   10.79
  -1 -15  18    5.81    8.05
   1  15 -17   11.90    9.84
  -1 -15  17  -16.20    7.90
   1  15 -16   20.44   12.03
  -1 -15  16    6.04    9.59
  -1  15  16   -0.30    5.11
   1 -15 -15   16.87    7.51
   1  15 -15    4.31    8.36
  -1 -15  15    9.67    8.25
  -1  15  15    2.55    5.49
   1 -15 -14   15.38    9.97
   1  15 -14   32.72    8.69
  -1 -15  14    3.91    7.71
  -1  15  14    0.21    5.22
   1 -15 -13    1.75    8.46
   1  15 -13    3.36   10.85
  -1 -15  13   16.34    9.40
  -1  15  13   -0.57    4.53
   1  15 -12   19.31    8.05
   1 -15 -12    1.84    6.48
  -1  15  12    0.29    4.85
  -1 -15  12    3.52    7.05
   1 -15 -11    0.60    8.11
   1  15 -11   -9.92    7.00
  -1 -15  11    0.26    5.87
  -1  15  11    3.14    4.14
   1  15 -10   -5.74    6.67
   1 -15 -10   15.00    7.96
   1  15 -10   -5.37    6.57
  -1  15  10   -1.96    4.24
  -1 -15  10    9.98    6.01
   1  15  -9    1.85    6.69
   1 -15  -9   16.93    8.18
  -1 -15   9   -0.58    5.89
  -1  15   9    2.89    4.59
   1  15  -8    1.10    6.68
   1 -15  -8   -0.72    8.11
  -1  15   8    7.56    4.76
  -1 -15   8    4.23    6.49
   1  15  -7    2.79    7.92
   1 -15  -7   -6.36    8.09
  -1  15   7    2.89    4.81
  -1 -15   7   10.09    8.20
   1 -15  -6    7.15    7.58
   1  15  -6   -3.04    5.87
  -1  15   6    3.49    5.02
  -1 -15   6    6.88    5.82
   1 -15  -5   -0.66    6.97
   1  15  -5    1.01    7.99
  -1 -15   5    3.07    8.03
  -1  15   5    3.67    5.17
   1 -15  -4    3.26    7.49
   1  15  -4   12.95    8.23
  -1  15   4    4.25    5.79
  -1 -15   4    1.95    8.29
   1  15  -3   12.81    8.14
   1 -15  -3    8.31    7.65
  -1 -15   3    1.31    8.91
  -1  15   3    2.93    8.66
  -1  15   3    7.79    6.17
   1  15  -2   -0.83    7.60
   1 -15  -2    1.28    7.84
  -1  15   2   22.74    8.43
  -1  15   2    5.20    5.67
  -1 -15   2    0.77    8.66
   1  15  -1   -0.87    7.11
   1  15  -1    2.29   11.00
   1 -15  -1   11.24    7.33
  -1 -15   1    7.80    8.57
  -1  15   1    8.54    5.88
  -1  15   1   -9.34    8.44
   1  15   0    3.62   14.06
   1  15   0   11.61    5.55
   1 -15   0    2.18    7.54
  -1  15   0    7.87   12.01
  -1  15   0    2.29    6.29
  -1 -15   0    9.33    8.67
   1  15   1   18.21   10.79
   1  15   1   10.10    5.49
   1 -15   1   -2.57    7.52
  -1 -15  -1   12.49    7.00
  -1  15  -1   -4.95    9.25
  -1  15  -1   14.59    5.11
   1  15   2   21.95   10.56
   1 -15   2   14.13    7.80
   1  15   2    2.78    7.46
  -1  15  -2   15.21    6.97
  -1 -15  -2   -0.36    9.61
  -1  15  -2    4.46    8.73
   1  15   3    7.60    5.14
   1 -15   3   -6.58    7.04
   1  15   3   10.61   10.00
  -1  15  -3    8.28    5.67
  -1  15  -3    7.18   11.89
  -1 -15  -3   12.63    7.27
   1 -15   4   11.45    6.48
   1  15   4    0.91    6.59
   1  15   4    0.42    9.49
  -1 -15  -4   -5.32    9.11
  -1  15  -4    6.60    7.09
   1  15   5    9.55    5.01
   1 -15   5   -3.36    7.39
   1  15   5   22.73   12.49
  -1  15  -5   -1.48    7.63
  -1 -15  -5    3.37    6.41
   1  15   6    3.27    6.30
   1  15   6   -9.47    5.57
   1 -15   6   -1.84    7.08
  -1  15  -6   -4.36    5.63
  -1 -15  -6   11.67    9.98
   1  15   7    1.48    4.74
   1 -15   7    4.82    5.45
  -1 -15  -7   -7.02    9.22
  -1  15  -7    3.04    7.94
   1  15   8    1.81    6.39
   1 -15   8    4.53    5.49
  -1 -15  -8    9.32    8.26
  -1  15  -8    3.23    6.28
   1 -15   9   23.98    8.70
   1  15   9    9.68    6.85
  -1 -15  -9    7.66   12.35
  -1  15  -9    9.49    9.56
   1 -15  10   13.96    8.61
   1  15  10   10.74    6.97
  -1  15 -10   24.83   10.21
  -1 -15 -10   -3.64   11.89
   1  15  11    7.46    5.19
   1 -15  11    2.06    8.64
  -1  15 -11   -5.17   10.69
  -1 -15 -11   17.39   11.82
   1  15  12    5.47    5.13
   1 -15  12    3.13    6.67
  -1  15 -12   10.57    7.86
  -1 -15 -12    8.07    8.59
   1 -15  13   12.49    8.46
   1  15  13   -1.53    4.60
  -1 -15 -13   -3.48   11.38
  -1  15 -13   -0.94   10.45
   1  15  14    3.28    7.02
   1 -15  14    6.07    6.97
  -1 -15 -14   16.84   12.19
  -1  15 -14    3.38    8.58
   1 -15  15    3.24   10.29
   1  15  15    9.68    6.97
  -1 -15 -15   14.76   11.81
  -1  15 -15   -4.43   12.15
   1 -15  16    1.71   10.00
   1  15  16    9.31    6.87
  -1  15 -16   -1.43   13.10
  -1 -15 -16   -1.38    9.43
   1  15  17   17.54    7.34
   1 -15  17    8.86   10.80
  -1  15 -17   -2.92   13.93
  -1 -15 -17   -8.00    9.88
   1 -15  18    3.15   10.59
   1  15  18    4.53    7.36
  -1  15 -18   -0.92   13.54
   1 -15  19    2.94   11.15
   1  15  19   -6.81    7.13
  -1  15 -19    8.43    9.71
   1 -15  20   -5.83    8.65
   1  15  20   -3.75    7.96
  -1  15 -20    2.12   10.68
   1 -15  21   -8.93    9.43
   1  15  21   10.68    6.27
  -1  15 -21    2.81   12.24
   1 -15  22    8.43   13.86
  -1  15 -22   18.89   13.10
   1 -15  23   10.53   10.66
  -1  15 -23   14.87   13.48
   1  16 -22   26.58   15.60
  -1 -16  22   27.47   11.96
   1  16 -21   15.62   20.11
  -1 -16  21   30.29   15.35
   1  16 -20    8.48   12.15
  -1 -16  20   11.79   13.53
   1  16 -19   -1.34   10.49
  -1 -16  19   -1.64    8.10
   1  16 -18   17.69   11.03
  -1 -16  18    3.60    9.45
   1  16 -17   19.91   10.51
  -1 -16  17    5.06    9.55
   1  16 -16   23.40   12.51
  -1 -16  16  -12.03   11.06
   1  16 -15   14.79    8.86
  -1 -16  15   -5.70    7.56
   1  16 -14   20.29    9.79
  -1 -16  14   12.02    9.16
   1  16 -13   -4.77   11.57
  -1 -16  13   13.43   10.49
   1  16 -12    7.71    8.14
  -1 -16  12   -2.05    7.20
  -1  16  12    0.56    4.67
   1  16 -11   26.66    7.93
   1 -16 -11    8.21    9.38
  -1  16  11   -0.03    5.08
   1  16 -10   16.93    7.70
   1 -16 -10   13.35    8.88
  -1  16  10    3.50    5.01
  -1 -16  10   -0.53    7.57
   1  16  -9   -3.48    7.21
   1 -16  -9   23.10    9.27
  -1  16   9    8.90    5.19
  -1 -16   9    1.66    7.39
   1 -16  -8   19.10    7.18
   1  16  -8    0.46    6.91
  -1 -16   8    3.66    7.29
  -1  16   8    9.49    5.40
   1  16  -7   -3.79    8.41
   1 -16  -7    2.46    8.41
  -1  16   7   -2.93    4.96
  -1 -16   7   11.24    6.62
   1  16  -6   10.92    8.35
   1 -16  -6   18.99    7.97
  -1 -16   6   -8.79    8.09
  -1  16   6   -2.70    5.17
   1 -16  -5    2.15    7.67
   1  16  -5   10.62    8.60
  -1 -16   5    4.75    6.92
  -1  16   5    3.60    5.58
   1  16  -4   16.09    6.83
   1 -16  -4   12.18    9.17
  -1  16   4    9.36    6.28
  -1 -16   4   10.52    7.76
   1 -16  -3    6.90    8.58
   1  16  -3   12.50    7.95
  -1  16   3   -4.50    5.52
  -1  16   3   14.92    6.35
  -1 -16   3    2.84    8.92
   1  16  -2    1.34   12.61
   1 -16  -2    4.71    8.10
   1  16  -2   14.87    8.36
  -1  16   2   -4.14    9.26
  -1 -16   2   23.55    9.27
  -1  16   2    6.12    6.17
   1  16  -1    0.15    7.42
   1 -16  -1   -2.61    7.37
   1  16  -1    9.98   11.59
  -1 -16   1   -0.88    8.54
  -1  16   1   16.36    6.55
  -1  16   1   -1.63   11.67
   1 -16   0  -11.17    5.53
   1  16   0   -1.58    7.27
   1  16   0   12.43   10.87
  -1  16   0    0.75    8.92
  -1 -16   0    5.74    8.82
  -1  16   0   -3.70    4.48
   1  16   1   -1.43    5.09
   1 -16   1   -1.43    6.98
   1  16   1   13.17   10.22
  -1  16  -1    0.25    8.71
  -1 -16  -1    5.34    8.94
  -1  16  -1   -6.63    6.34
   1 -16   2   12.84    6.27
   1  16   2   14.40    5.98
   1  16   2   20.66   12.05
  -1  16  -2    2.24   10.45
  -1  16  -2   15.46    7.61
  -1 -16  -2    4.14    7.96
   1  16   3   14.77    8.44
   1  16   3    5.03   11.32
   1 -16   3   10.16    8.59
  -1  16  -3    1.68   10.79
  -1 -16  -3   17.50   11.69
  -1  16  -3   21.55    6.55
   1 -16   4    0.41    8.66
   1  16   4    2.99    7.39
   1  16   4    9.39   10.27
  -1 -16  -4   12.49   10.49
  -1  16  -4   13.61    8.33
  -1  16  -4   17.57   10.36
   1  16   5   11.45    9.49
   1  16   5    4.06    4.73
   1 -16   5   -4.06    7.11
  -1  16  -5   -1.17    5.56
  -1 -16  -5    1.19    7.03
   1 -16   6    8.33    5.87
   1  16   6   -0.62    6.46
  -1  16  -6   -1.16    5.89
  -1 -16  -6    7.03   10.42
   1  16   7    3.14    7.03
   1 -16   7   11.49    8.95
  -1 -16  -7   10.42   11.95
  -1  16  -7   15.43    8.89
   1 -16   8   -5.90    6.26
   1  16   8    3.95    4.83
  -1 -16  -8    6.03   10.88
  -1  16  -8   17.75    9.07
   1 -16   9   14.04    6.82
   1  16   9    6.73    4.93
  -1  16  -9    5.33    7.26
  -1 -16  -9    1.79    8.88
   1  16  10   -4.27    6.11
   1 -16  10   -2.67    5.64
  -1 -16 -10    6.66    8.04
  -1  16 -10    3.62    6.68
   1  16  11   20.16    7.03
   1 -16  11   -8.17    6.84
  -1 -16 -11    9.65    8.96
  -1  16 -11    2.16    7.60
   1 -16  12   16.72   10.13
   1  16  12    9.58    7.93
  -1  16 -12   29.88   12.43
  -1 -16 -12   13.45   10.53
   1  16  13   12.23    5.68
   1 -16  13    7.70    7.69
  -1 -16 -13   11.34   10.99
  -1  16 -13   11.97    9.01
   1 -16  14   -0.01   10.82
   1  16  14    5.44    5.27
  -1  16 -14   27.64   12.69
  -1 -16 -14   20.47   13.22
   1  16  15    5.48    7.45
   1 -16  15   12.24    7.98
  -1 -16 -15   16.57   13.50
  -1  16 -15    1.23    9.49
   1 -16  16    9.22    8.21
   1  16  16    5.93    7.20
  -1  16 -16    7.69    9.84
  -1 -16 -16    0.58   10.07
   1 -16  17   20.78   10.30
   1  16  17   -4.83    6.98
  -1  16 -17   -0.64    9.61
   1 -16  18  -12.44    9.22
  -1  16 -18   -2.16   11.16
   1 -16  19    3.18    8.82
  -1  16 -19  -16.14   10.89
   1 -16  20    7.34   10.05
  -1  16 -20    3.71   12.06
   1 -16  21   -9.01   13.15
  -1  16 -21    2.29   17.07
   1  17 -20   -1.30   11.59
  -1 -17  20   10.52    9.98
   1  17 -19   -0.25   10.26
  -1 -17  19    0.31    8.81
   1  17 -18   -4.28   11.26
  -1 -17  18   19.00   10.00
   1  17 -17   24.34   10.29
  -1 -17  17   -9.67    8.85
   1  17 -16    4.24   12.77
  -1 -17  16    1.56   11.29
   1  17 -15   -3.14   12.85
  -1 -17  15   13.25   11.60
   1  17 -14   14.81    9.81
  -1 -17  14    6.96    8.56
   1  17 -13    5.84   12.57
  -1 -17  13   17.22   11.41
   1  17 -12   15.70    9.67
  -1 -17  12   23.96    9.11
   1  17 -11    9.65    8.41
  -1 -17  11    7.97    7.98
   1  17 -10    6.27    8.53
  -1 -17  10   23.20   10.74
   1  17  -9   -0.32    8.17
  -1 -17   9   23.73    9.94
   1  17  -8   11.55    8.04
  -1 -17   8   11.49    7.68
   1  17  -7    1.44    6.97
  -1 -17   7    6.18    6.97
  -1  17   7    0.00    5.32
   1 -17  -6    3.68    8.38
   1  17  -6    5.88    8.76
  -1  17   6   -5.09    5.27
  -1 -17   6    4.94    6.55
   1  17  -5   16.59    7.58
   1 -17  -5   -1.63   10.39
  -1 -17   5   -2.25   10.56
  -1  17   5   14.78    6.25
   1 -17  -4    5.33   10.19
   1  17  -4   19.00   10.58
  -1  17   4   20.42    7.06
  -1 -17   4   30.38   11.16
   1 -17  -3    5.77    8.18
   1  17  -3   27.61   13.15
   1  17  -3    4.12    6.32
  -1 -17   3   -6.46    7.30
  -1  17   3    2.75    6.24
   1 -17  -2    5.46    9.44
   1  17  -2   35.61   19.55
   1  17  -2   13.19    6.95
  -1  17   2    1.96   10.60
  -1 -17   2   18.88   10.44
  -1  17   2    8.06    7.11
   1  17  -1    7.03    8.24
   1  17  -1   11.05   12.03
   1 -17  -1    0.43    8.65
  -1 -17   1    9.54   10.08
  -1  17   1    4.20    4.87
  -1  17   1   -5.47    9.25
   1 -17   0   17.31    9.64
   1  17   0    8.37   17.20
   1  17   0   18.32    8.80
  -1  17   0    5.87    7.63
  -1  17   0   10.76   10.63
  -1 -17   0    2.47   10.36
   1  17   1    3.69   12.28
   1 -17   1   10.12    6.52
   1  17   1    2.62    8.41
  -1 -17  -1   20.77   11.04
  -1  17  -1    1.81   10.47
  -1  17  -1    1.37    7.32
   1  17   2   -3.62    8.11
   1  17   2   -2.96   11.15
   1 -17   2    4.31    8.57
  -1  17  -2    7.84    5.60
  -1 -17  -2   24.61   10.99
  -1  17  -2   -0.46    9.14
   1  17   3   19.80   12.59
   1 -17   3    3.92    9.26
   1  17   3   15.79    6.27
  -1 -17  -3    4.51   11.95
  -1  17  -3    3.30   10.94
  -1  17  -3   16.67    8.55
   1  17   4   16.75   11.04
   1 -17   4   10.24    9.00
   1  17   4    4.56    5.87
  -1  17  -4    4.78   14.35
  -1 -17  -4    9.60    8.76
  -1  17  -4   14.75    8.61
   1 -17   5   10.40    6.02
   1  17   5    4.72    6.56
  -1 -17  -5   -8.03    8.12
  -1  17  -5   -3.26    5.95
  -1  17  -5  -12.16   10.47
   1 -17   6    4.23    8.39
   1  17   6    9.18    7.23
  -1  17  -6    0.37   11.09
  -1  17  -6    6.25    8.98
  -1 -17  -6   -1.51   10.77
   1 -17   7    2.28    8.49
   1  17   7    3.37    6.90
  -1  17  -7    1.80    6.05
  -1 -17  -7   -5.81   11.39
   1 -17   8   -5.55    8.27
   1  17   8   -0.37    6.64
  -1  17  -8  -10.11    9.06
  -1 -17  -8   10.74   11.64
   1  17   9   10.44    7.08
   1 -17   9    5.77    9.52
  -1 -17  -9   19.09   12.93
  -1  17  -9   -9.17    9.62
   1 -17  10    7.16    9.34
   1  17  10   -0.10    7.08
  -1  17 -10  -21.76   10.01
  -1 -17 -10   -5.15   12.74
   1  17  11   -0.90    6.37
   1 -17  11   -8.91    9.06
  -1  17 -11    1.03   10.10
  -1 -17 -11   30.48   11.68
   1 -17  12    4.74    9.06
   1  17  12   -4.12    6.61
  -1  17 -12    4.81   10.16
  -1 -17 -12   11.70   12.30
   1  17  13    7.39    6.90
   1 -17  13   -2.20    7.50
  -1  17 -13    5.01    8.10
   1 -17  14    2.72    9.96
  -1  17 -14   -4.89    8.86
   1 -17  15   -0.34   10.25
  -1  17 -15   -2.21   11.86
   1 -17  16   -5.73    8.88
  -1  17 -16   -8.04   10.10
   1 -17  17   -3.24    7.91
  -1  17 -17    4.78    9.32
   1 -17  18    9.76    9.39
  -1  17 -18    2.69   11.48
   1 -17  19    4.70    9.24
  -1  17 -19   -8.98   11.40
   1  18 -17   10.14   12.77
  -1 -18  17   29.00   11.39
   1  18 -16   -8.24   14.33
  -1 -18  16   19.18   13.01
   1  18 -15    2.66   13.47
  -1 -18  15    5.83   11.93
   1  18 -14  -10.07    9.44
  -1 -18  14    0.47    8.80
   1  18 -13   -4.69   12.38
  -1 -18  13    0.14   11.78
   1  18 -12    8.54    8.50
  -1 -18  12   -1.46    8.40
   1  18 -11   17.07    9.29
  -1 -18  11   12.04    9.80
   1  18 -10   -0.89   10.92
  -1 -18  10  -11.65   11.36
   1  18  -9   11.04   13.01
  -1 -18   9   34.25   13.15
   1  18  -8   19.62   11.07
  -1 -18   8   -1.76   11.23
   1  18  -7    7.03   10.48
  -1 -18   7    4.35   10.55
   1  18  -6    6.43    7.20
  -1 -18   6    2.30    7.58
   1  18  -5   -2.38    9.18
  -1 -18   5   -0.51    9.95
   1  18  -4   17.70    7.46
   1  18  -4   16.11   23.54
  -1 -18   4    3.14   11.69
   1  18  -3    1.15   13.95
   1  18  -3   -3.44    8.88
  -1 -18   3   10.03   10.58
   1  18  -2   34.81   15.45
   1  18  -2    9.93    7.40
  -1 -18   2    5.13    8.48
   1  18  -1  -14.90   13.07
   1  18  -1   14.51    6.61
  -1  18   1    2.52   10.87
  -1  18   1    5.17    7.22
  -1 -18   1   -7.55   10.49
   1  18   0    6.84    8.68
   1  18   0   16.24   13.13
  -1 -18   0   -0.93   10.87
  -1  18   0    4.94   13.21
  -1  18   0   -1.31    5.32
   1 -18   1    7.54    9.88
   1  18   1   15.89    9.17
   1  18   1   37.99   17.77
  -1 -18  -1   27.06   12.08
  -1  18  -1   -3.04   11.40
  -1  18  -1    0.14    8.36
   1 -18   2    0.76    9.07
   1  18   2    0.06   12.75
   1  18   2   16.14    8.46
  -1 -18  -2    7.15   12.13
  -1  18  -2    3.09   10.46
  -1  18  -2   -2.10    8.14
   1 -18   3   11.56    9.45
   1  18   3   21.69    8.51
   1  18   3  -11.03   17.16
  -1  18  -3    3.08    8.84
  -1  18  -3   -3.36   16.08
  -1 -18  -3    4.33   12.21
   1 -18   4    6.89    9.10
   1  18   4   -3.01    6.50
   1  18   4   -3.54    7.51
  -1  18  -4    0.14   10.51
  -1 -18  -4   10.00   10.39
  -1  18  -4    3.93    7.97
   1 -18   5   -7.36    7.32
   1  18   5   10.93    7.95
  -1  18  -5   13.22    6.93
  -1 -18  -5   20.89   12.38
  -1  18  -5    7.48   12.27
   1 -18   6    7.25   10.08
   1  18   6   11.64    8.10
  -1  18  -6    4.71    9.71
  -1  18  -6    6.26   12.54
  -1 -18  -6   -5.95   12.02
   1  18   7   12.85    8.11
  -1  18  -7    7.36    7.57
  -1  18  -7   -5.76   17.34
  -1 -18  -7   -2.49   13.78
   1  18   8   19.37    8.01
   1 -18   8   -4.60   10.45
  -1  18  -8   13.69    7.65
   1 -18   9    8.34   10.93
  -1  18  -9   21.67   11.09
   1 -18  10   18.12   10.47
  -1  18 -10   -0.38   11.61
   1 -18  11   -4.73   10.52
  -1  18 -11   -8.05    8.55
   1 -18  12    5.28    8.37
  -1  18 -12    3.91    9.06
   1 -18  13   -7.71    9.93
  -1  18 -13   12.31   11.26
   1 -18  14    3.64    8.93
  -1  18 -14   16.96   10.30
   1 -18  15   12.07   13.81
  -1  18 -15   31.61   15.67
   1 -18  16    5.70   12.04
  -1  18 -16    2.67   13.52
  -1 -19  14   -3.43    9.21
   1  19 -13    4.91   14.06
  -1 -19  13   24.79   13.98
   1  19 -12    5.70    9.09
  -1 -19  12    0.95    8.27
   1  19 -11   -4.45   11.14
  -1 -19  11    2.59   11.33
   1  19 -10    4.06   11.25
  -1 -19  10   -5.79   10.99
   1  19  -9   13.08   12.09
  -1 -19   9  -27.03   12.26
   1  19  -8   -4.18   10.90
  -1 -19   8    9.65    8.67
   1  19  -7    4.93   11.04
  -1 -19   7   10.93   11.62
   1  19  -6    6.03   18.94
   1  19  -6   -4.51   10.92
  -1 -19   6   18.17   11.35
   1  19  -5   -0.68    7.53
   1  19  -5   23.77   16.54
  -1 -19   5    3.29    8.53
   1  19  -4   -0.92    9.09
   1  19  -4   10.05   15.79
  -1 -19   4   -6.86   10.70
   1  19  -3   -3.12    7.22
   1  19  -3   12.64   21.88
  -1 -19   3   21.90   11.75
   1  19  -2   12.57    9.98
   1  19  -2   36.63   16.24
  -1 -19   2  -10.27   12.41
   1  19  -1    2.01    6.90
   1  19  -1   -2.44   15.45
  -1 -19   1    9.82    9.43
   1  19   0   -0.83    8.88
   1  19   0   30.83   17.61
  -1  19   0  -12.59   10.74
  -1 -19   0   -2.06   12.23
   1  19   1    5.17   10.03
   1  19   1   24.72   15.12
  -1  19  -1   11.12   12.32
  -1 -19  -1   17.38   14.01
   1  19   2   18.49   14.25
   1  19   2    4.63    9.73
  -1  19  -2   19.88   16.09
   1  19   3    5.35    8.02
  -1  19  -3   -1.39   11.58
  -1  19  -4  -13.43   14.23
  -1  19  -5   20.12   15.39
  -1  19  -6    4.33   16.82
  -1  19  -7   -3.12    8.94
  -1  19  -7    8.02   15.78
  -1  19  -8   15.50   18.04
  -1  19  -8    0.48    7.47
  -1  19  -9   14.76    8.99
  -1  19  -9   32.90   16.43
   1 -19  10   -3.26    7.59
  -1  19 -10   -1.04    7.64
   1 -19  11    6.42    8.67
  -1  19 -11    7.09    8.60
   1 -19  12   -1.98   11.22
  -1  19 -12   11.29   11.72
   1 -19  13    3.02   11.25
  -1  19 -13   -4.47    8.73
  -1 -20  10   -6.99   10.25
   1  20  -9   -0.61    9.47
  -1 -20   9   11.18    9.88
   1  20  -8   12.79    9.82
  -1 -20   8   11.91   10.45
   1  20  -7   28.98   24.42
   1  20  -7   13.88    9.53
   1  20  -6    8.55   21.26
   1  20  -6    5.36   11.25
   1  20  -5    3.33   18.33
   1  20  -4   17.67   20.32
   1  20  -3   25.94   28.24
   1  20  -2   17.91   19.30
   1  20  -1    9.92   17.06
   1  20   0   17.01   17.41
   1  20   1   29.05   23.34
  -1  20  -1    8.27   13.51
   1  20   2   11.06    9.51
  -1  20  -2    7.86   12.64
  -1  20  -3   -3.25   13.08
  -1  20  -4  -10.66   13.95
  -1  20  -5   30.19   23.76
  -1  20  -6   -2.90   17.96
  -1  20  -7   10.43   20.64
  -1  20  -8   34.90   25.54
  -1  20  -9   19.83   24.07
  -2   0  35    6.52   12.20
  -2   0  35   25.88   18.21
  -2   0  35   24.19   11.60
  -2   0  34   15.06   10.36
  -2   0  34    5.20   18.27
  -2   0  33  -11.35   13.39
  -2   0  33   -2.30   12.68
  -2   0  32    2.18    9.12
  -2   0  31    4.74    9.07
  -2   0  30   12.16   12.58
  -2   0  29    9.83    8.50
  -2   0  28   15.89    8.25
  -2   0  27    7.37    7.67
  -2   0  26   17.79    7.97
  -2   0  25   28.68   10.93
  -2   0  24  -10.23    6.83
  -2   0  23   18.03    9.96
  -2   0  22   71.16   10.63
  -2   0  21    4.44    5.36
  -2   0  20    9.42    5.48
  -2   0  19  147.15   15.05
  -2   0  18    5.20    5.00
  -2   0  17    0.75    4.18
   2   0 -16   14.18    4.07
  -2   0  16   23.98    7.02
   2   0 -15   29.62    4.65
  -2   0  15   42.41    7.58
   2   0 -14   -0.88    3.99
  -2   0  14    5.07    4.01
   2   0 -13   43.10    4.96
  -2   0  13   41.36    6.55
   2   0 -12  332.93   25.45
  -2   0  12  393.39   32.82
   2   0 -11   11.76    4.62
  -2   0  11   15.12    4.64
   2   0 -10   25.33    4.04
  -2   0  10   31.26    5.32
   2   0  -9  288.46   20.44
  -2   0   9  314.27   22.19
   2   0  -8    9.20    4.29
  -2   0   8   12.82    3.97
   2   0  -7    0.46    2.61
  -2   0   7    4.60    3.21
  -2   0   7    0.32    3.75
  -2   0   7    6.19    3.28
   2   0  -6   22.11    3.25
  -2   0   6   24.58    4.79
  -2   0   6   20.66    4.88
   2   0  -5   19.40    1.93
   2   0  -5   20.89    3.10
   2   0  -5   28.00    3.77
  -2   0   5   22.31    3.40
  -2   0   5   24.40    4.33
   2   0  -4   62.11    4.14
   2   0  -4   65.89    5.53
   2   0  -4   50.54    5.24
  -2   0   4   61.19    5.71
  -2   0   4   61.16    4.58
   2   0  -3  228.92   14.38
   2   0  -3  239.35   13.37
   2   0  -3  250.74   14.71
  -2   0   3  234.42   14.61
  -2   0   3  163.97   11.72
   2   0   1  259.87   17.85
   2   0   1  239.20   13.82
   2   0   1  245.54   14.17
  -2   0  -1  246.34   14.28
   2   0   2   46.47    6.75
   2   0   2   56.38    4.86
  -2   0  -2   55.88    7.87
  -2   0  -2   62.62    4.82
   2   0   3   26.45    4.01
   2   0   3   23.81    6.18
  -2   0  -3   22.89    3.62
  -2   0  -3   18.61    3.49
  -2   0  -3   23.95    7.12
   2   0   4   20.52    9.73
   2   0   4   29.41    4.56
  -2   0  -4   22.43    8.22
  -2   0  -4   20.63    5.33
   2   0   5    4.11    3.73
   2   0   5    5.30    8.14
  -2   0  -5    1.46    3.21
   2   0   6   15.96    6.78
   2   0   6   16.38    4.73
  -2   0  -6   12.76    3.83
   2   0   7  308.43   24.50
   2   0   7  306.35   30.94
  -2   0  -7  330.18   24.28
   2   0   8   28.54    6.07
   2   0   8   35.25    8.54
  -2   0  -8   28.82    4.63
   2   0   9   13.59    6.85
   2   0   9   15.15    5.31
  -2   0  -9   12.29    3.62
   2   0  10  304.11   26.57
   2   0  10  329.83   32.06
  -2   0 -10  336.69   24.96
   2   0  11   59.67   12.73
   2   0  11   65.25   10.43
  -2   0 -11   43.04    5.62
   2   0  12   -1.43    5.43
   2   0  12   -0.67    4.22
  -2   0 -12    1.81    3.06
   2   0  13   30.32    8.81
   2   0  13   43.88    7.08
  -2   0 -13   41.34    5.31
   2   0  14   29.77    6.75
   2   0  15    6.98    5.06
   2   0  16    3.47    4.99
   2   0  17  185.04   18.39
   2   0  18   -1.23    5.50
   2   0  19    1.12    5.42
   2   0  20   83.62   12.13
   2   0  21   -0.63    8.53
   2   0  22   11.10    7.38
   2   0  23   20.71    8.24
   2   0  24    1.58    6.67
   2   0  25    1.44    7.37
   2   0  26    6.20    7.83
   2   0  27    7.05    8.48
   2   0  28   -0.62    7.77
   2   0  29    9.63    9.59
   2   0  30   26.48   11.01
   2   0  31   15.85   11.12
   2   0  32   18.78   10.70
   2   0  33   15.97   11.16
  -2   1  35    4.57   14.54
  -2  -1  35   27.52   16.04
  -2   1  35    7.54   18.02
  -2  -1  34    6.79    6.00
  -2  -1  34    8.72   10.26
  -2   1  34  -26.84   12.41
  -2   1  34    8.96   16.14
  -2  -1  33   17.25    9.89
  -2   1  33    2.21   10.30
  -2   1  33   21.40   14.27
  -2  -1  33    4.36   11.22
  -2  -1  32    2.69   14.62
  -2   1  32   26.31   10.57
  -2   1  32   37.40   15.72
  -2   1  31  -27.27   19.16
  -2  -1  31   14.34    9.00
  -2   1  31    4.62   12.02
  -2  -1  30   25.83   10.45
  -2   1  30   16.78   10.57
  -2  -1  29    5.09    8.14
  -2   1  29    4.44    7.13
  -2  -1  28    7.71    7.53
  -2   1  28   -3.12    6.73
  -2   1  27   -6.43    9.35
  -2  -1  27   -1.38    7.38
  -2   1  26   31.61    9.40
  -2  -1  26   19.64    8.81
  -2   1  25   11.65    6.90
  -2  -1  25    9.52    6.94
  -2  -1  24   -3.54    7.78
  -2   1  24    2.66    5.88
  -2   1  23   -2.78    5.75
  -2  -1  23    3.99    6.06
  -2   1  22   -1.41    7.94
  -2  -1  22    7.20    6.11
  -2  -1  21   31.75    9.27
  -2   1  21   14.02    6.90
  -2  -1  20   18.68    6.96
  -2   1  20   29.93    8.95
  -2  -1  19    9.56    5.59
  -2   1  19   13.90    5.58
  -2   1  18   85.26   12.22
  -2  -1  18   85.92   10.28
  -2   1  17   11.35    4.90
  -2  -1  17   11.55    5.36
   2  -1 -16    6.18    3.68
  -2  -1  16   12.51    4.74
  -2   1  16   15.17    4.68
   2  -1 -15   96.10   10.35
   2   1 -15   91.29   10.44
  -2   1  15  123.51   12.57
  -2  -1  15  106.99   13.03
   2  -1 -14  125.87   10.63
   2   1 -14  136.36   11.34
  -2   1  14  169.70   15.79
  -2  -1  14  176.84   14.34
   2   1 -13   27.60    5.87
   2  -1 -13   33.50    4.31
  -2  -1  13   40.05    8.02
  -2   1  13   27.83    5.30
   2  -1 -12  124.17    9.36
   2   1 -12  115.47    9.54
  -2   1  12  134.49   13.17
  -2  -1  12  124.23   11.26
   2   1 -11  185.04   13.91
   2  -1 -11  176.20   12.63
  -2   1  11  212.90   15.26
  -2  -1  11  222.88   19.60
   2   1 -10   21.47    3.99
   2  -1 -10   14.54    3.48
  -2   1  10   20.88    4.62
  -2   1  10   24.25    4.23
  -2  -1  10   24.18    5.26
   2  -1  -9  377.53   26.05
   2   1  -9  344.76   25.90
  -2  -1   9  396.94   29.75
  -2   1   9  371.19   31.97
  -2   1   9  375.48   27.25
   2  -1  -8   57.91    4.93
   2   1  -8   62.28    5.59
  -2  -1   8   62.33    7.06
  -2   1   8   56.76    6.50
  -2   1   8   62.19    7.49
   2  -1  -7  392.50   25.65
   2   1  -7  384.30   27.33
  -2   1   7  378.92   26.03
  -2   1   7  383.23   28.24
  -2  -1   7  410.83   29.90
   2  -1  -6 1180.15  115.12
   2  -1  -6 1130.65  105.15
   2   1  -6 1171.50  118.24
  -2   1   6 1147.51  110.89
  -2   1   6 1135.19  111.68
  -2  -1   6 1158.60  114.21
   2   1  -5  117.55    8.02
   2  -1  -5  126.45    8.67
   2   1  -5  111.80   10.44
   2  -1  -5  123.76    6.58
  -2   1   5  110.63    6.69
  -2  -1   5  130.39    9.31
  -2   1   5  121.67    8.66
  -2  -1   5  134.60   10.31
   2   1  -4   70.33    5.43
   2  -1  -4   73.98    5.62
   2  -1  -4   66.41    4.43
   2   1  -4   70.38    6.81
  -2  -1   4   68.41    6.15
  -2  -1   4   80.18    6.04
  -2   1   4   72.18    4.83
  -2  -1   4   71.19    6.39
  -2   1   4   65.95    5.98
   2  -1  -3   52.18    3.71
   2  -1  -3   57.83    4.52
   2   1  -3   52.57    5.31
   2  -1  -3   57.61    3.20
   2   1  -3   52.04    4.54
   2   1  -3   52.97    4.32
  -2  -1   3   53.97    4.78
  -2  -1   3   57.49    6.67
  -2   1   3   60.69    6.67
  -2  -1   3   62.79    5.38
  -2   1   3   55.29    3.90
   2  -1  -2  148.01    6.91
   2   1  -2  134.04    8.44
   2   1  -2  145.83    9.40
   2  -1  -2  158.86    9.09
   2   1  -2  128.84    8.03
  -2  -1   2  161.29    9.58
  -2  -1   2  151.80    9.22
  -2   1   2  141.95    8.84
  -2  -1   2  166.08   10.07
   2   1   0  152.59    9.92
   2  -1   0  152.43    8.11
   2  -1   0  157.16    9.18
   2  -1   0  158.59   10.73
   2   1   0  133.17    8.80
   2   1   0  137.99    8.72
  -2   1   0  130.86    8.65
  -2  -1   0  155.85   13.67
  -2  -1   0  147.66    9.02
  -2  -1   0  150.29    9.25
   2   1   1   53.24    3.58
   2  -1   1   59.57    6.01
   2  -1   1   50.71    3.64
   2   1   1   47.20    4.82
   2  -1   1   52.11    4.81
   2   1   1   52.29    6.05
  -2  -1  -1   61.21    4.63
  -2   1  -1   50.24    3.60
  -2   1  -1   55.76    5.90
  -2  -1  -1   42.50    6.60
  -2  -1  -1   54.42    4.57
   2   1   2   67.33    4.34
   2  -1   2   66.72    5.18
   2   1   2   70.83    5.90
   2   1   2   60.49    8.11
   2  -1   2   71.15    7.49
  -2  -1  -2   66.01    5.66
  -2   1  -2   67.07    4.94
  -2  -1  -2   55.11    9.03
   2  -1   3  134.82    9.14
   2   1   3  116.89    8.94
   2   1   3  112.46    9.55
   2  -1   3  123.48   11.99
   2   1   3  134.04   13.08
  -2   1  -3  115.96    8.09
  -2  -1  -3  143.30    9.57
  -2  -1  -3  140.63   14.76
   2  -1   4 1152.96  113.64
   2   1   4 1179.74  117.30
   2   1   4 1066.26  118.78
  -2  -1  -4 1165.19  132.85
  -2  -1  -4 1183.87  118.38
  -2  -1  -4 1175.94  115.63
  -2   1  -4 1198.72  116.84
   2   1   5  385.32   35.13
   2   1   5  331.00   27.50
   2  -1   5  412.86   30.26
  -2  -1  -5  436.49   42.18
  -2   1  -5  409.61   29.10
  -2  -1  -5  411.04   29.36
  -2  -1  -5  430.88   29.72
   2   1   6   49.36    6.80
   2   1   6   56.68    9.65
   2  -1   6   53.13    6.85
  -2  -1  -6   62.44    6.11
  -2  -1  -6   81.83   12.91
  -2   1  -6   59.42    6.02
   2  -1   7  400.35   30.95
   2   1   7  371.61   36.42
   2   1   7  411.32   31.98
  -2  -1  -7  401.03   29.22
  -2   1  -7  360.24   27.74
   2  -1   8   26.70    5.45
   2   1   8   16.49    5.28
   2   1   8   14.41    6.86
  -2   1  -8   17.50    4.25
  -2  -1  -8   27.47    4.26
   2   1   9  177.99   19.78
   2  -1   9  198.84   16.58
   2   1   9  241.28   18.20
  -2  -1  -9  188.44   14.24
  -2   1  -9  190.51   14.66
   2  -1  10  130.92   13.29
   2   1  10  136.93   15.67
   2   1  10  133.62   11.90
  -2   1 -10  124.63   10.27
  -2  -1 -10  113.94    9.86
   2  -1  11   48.13    6.33
   2   1  11   36.06    6.51
   2   1  11   27.01    7.83
  -2   1 -11   29.71    5.13
  -2  -1 -11   34.51    4.67
   2   1  12  133.83   16.54
   2   1  12  170.58   14.42
   2  -1  12  139.09   13.25
  -2  -1 -12  129.14   11.29
  -2   1 -12  148.22   14.14
   2  -1  13  103.24   10.40
   2   1  13  114.34   11.23
   2   1  13   82.00   13.25
  -2  -1 -13   85.21    8.33
   2   1  14    6.97    5.17
   2  -1  14    9.19    5.41
   2  -1  15    8.38    6.01
   2   1  15   17.15    7.38
   2  -1  16   81.83   10.99
   2   1  16   73.95   10.06
   2   1  17   13.04    7.87
   2  -1  17    8.51    8.15
   2   1  18   18.06    6.93
   2  -1  18   30.83    9.95
   2  -1  19   20.60   10.07
   2   1  19   21.12    7.28
   2  -1  20    2.14    8.89
   2   1  20   14.75    8.68
   2  -1  21    9.94    7.48
   2   1  21   16.73    7.12
   2   1  22    1.44    6.11
   2  -1  22   -4.06    6.28
   2   1  23   -0.54    6.17
   2  -1  23    2.63    6.50
   2   1  24   21.79    8.54
   2  -1  24   17.21    8.78
   2   1  25   -1.10    8.92
   2  -1  25    0.10    7.35
   2   1  26   -1.19    9.88
   2  -1  26    6.08    7.73
   2  -1  27   -2.22    7.82
   2   1  27    5.56    7.50
   2  -1  28   22.23   11.12
   2   1  28   11.74   10.24
   2   1  29   -0.05    8.43
   2  -1  29    6.48    8.65
   2  -1  30    0.72    9.84
   2   1  30    8.22    9.57
   2   1  31    0.30    9.12
   2  -1  31    3.53    9.09
   2  -1  32   15.84   10.89
   2   1  32   10.06   10.75
   2   1  33   -8.79    9.62
   2  -1  33    4.00   13.53
  -2   2  35    9.88    9.07
  -2  -2  35  -15.52   10.02
  -2   2  35   -2.41   15.21
  -2   2  34   -2.67   12.62
  -2   2  34    7.50    9.06
  -2  -2  34    0.54   13.25
  -2   2  33    2.22   13.58
  -2   2  33    5.99    8.81
  -2  -2  33    2.92   10.12
  -2  -2  32    0.75   12.70
  -2   2  32   -7.71   18.19
  -2   2  32   16.28   11.18
  -2  -2  32   -7.49    5.21
  -2   2  31   -1.83   13.90
  -2  -2  31    9.45    9.96
  -2   2  31   -2.64    8.59
  -2  -2  31    9.75    5.43
  -2  -2  30   12.60    8.57
  -2   2  30  -12.24   13.06
  -2   2  30   -2.26    7.61
  -2  -2  30    8.68    8.78
  -2   2  29   -2.53   16.28
  -2  -2  29   -5.41    8.81
  -2  -2  29    3.61    7.54
  -2   2  29    8.66    7.32
  -2   2  28   -5.86   11.02
  -2   2  28    1.90    6.57
  -2  -2  28    1.76    7.49
  -2   2  27   58.77   18.81
  -2  -2  27    5.95    9.94
  -2   2  27   26.18   11.37
  -2  -2  26    0.82    7.50
  -2   2  26   -3.39    6.76
  -2   2  26   27.80   10.22
  -2   2  25    3.11    6.05
  -2  -2  25    4.09    7.28
  -2   2  24   19.79    7.45
  -2  -2  24   12.70    8.71
  -2  -2  23   30.80    8.80
  -2   2  23   36.44   11.22
  -2   2  22    8.16    5.85
  -2  -2  22   14.75    9.09
  -2   2  21   58.84    9.53
  -2  -2  21   58.24   10.50
  -2  -2  20   50.08    9.17
  -2   2  20   51.24   10.63
  -2  -2  19   20.43    6.91
  -2   2  19   20.17    5.91
  -2   2  18   28.15    6.51
  -2  -2  18   30.72    6.91
  -2   2  17   42.90    6.64
  -2  -2  17   48.69    7.64
   2  -2 -16   57.37    6.28
  -2  -2  16   60.50    8.47
  -2   2  16   67.28    7.83
   2  -2 -15   17.75    3.70
  -2   2  15   27.02    6.75
  -2  -2  15   12.49    5.97
   2  -2 -14   51.74    6.74
   2   2 -14   47.96    5.92
  -2   2  14   53.25    6.59
  -2   2  14   61.12    8.98
  -2  -2  14   48.60    7.71
   2  -2 -13   26.78    5.39
   2   2 -13   20.85    4.78
  -2   2  13   40.71    6.68
  -2  -2  13   38.61    6.43
  -2  -2  13   37.80    6.19
  -2   2  13   33.56    6.91
   2   2 -12   11.82    5.19
   2  -2 -12   24.66    3.57
  -2  -2  12   15.81    3.13
  -2   2  12   20.54    4.25
  -2  -2  12   29.26    5.75
  -2   2  12   14.14    4.30
   2   2 -11  141.04   11.39
   2  -2 -11  158.87   10.94
  -2  -2  11  161.75   13.63
  -2   2  11  161.18   12.37
  -2   2  11  183.88   12.99
   2   2 -10   57.69    7.97
   2  -2 -10   80.65    5.91
  -2  -2  10   63.29    7.65
  -2   2  10   55.88    6.32
  -2   2  10   57.44    6.17
   2  -2  -9    1.39    3.26
   2   2  -9    4.80    3.11
  -2   2   9    5.04    3.23
  -2   2   9   -0.12    2.95
  -2  -2   9   -5.02    5.38
   2   2  -8   89.72    7.36
   2  -2  -8   69.18    6.41
  -2  -2   8   56.16    7.45
  -2   2   8   77.87    7.19
  -2   2   8   83.98    5.98
   2  -2  -7  381.20   25.16
   2  -2  -7  379.53   25.67
   2   2  -7  359.77   26.42
  -2  -2   7  411.60   29.99
  -2   2   7  339.56   22.49
  -2   2   7  336.17   24.41
   2  -2  -6  111.64    7.36
   2  -2  -6  119.85    7.66
   2   2  -6   99.58    8.59
  -2   2   6  101.11    7.29
  -2  -2   6  114.81   12.07
  -2   2   6  122.72    8.71
   2   2  -5  231.18   18.93
   2  -2  -5  222.44   13.63
   2   2  -5  226.08   15.21
   2  -2  -5  239.63   14.22
  -2  -2   5  240.86   17.06
  -2   2   5  203.97   16.67
  -2   2   5  216.91   12.39
   2   2  -4  511.32   43.16
   2  -2  -4  561.33   41.29
   2   2  -4  523.99   39.21
  -2  -2   4  573.59   43.89
  -2  -2   4  534.05   42.37
  -2   2   4  524.14   38.15
   2  -2  -3   42.73    4.86
   2  -2  -3   41.44    1.98
   2   2  -3   36.72    4.24
   2   2  -3   37.28    5.83
  -2  -2   3   47.31    4.69
  -2   2   3   40.57    4.12
  -2  -2   3   30.84    4.84
  -2  -2   3   32.57    5.01
   2   2  -2  227.87   13.65
   2  -2  -2  229.67   14.58
   2   2  -2  237.79   16.06
   2   2  -2  232.30   14.64
  -2  -2   2  228.83   15.94
  -2   2   2  220.24   13.34
  -2   2   2  194.69    7.94
  -2  -2   2  227.38   15.10
  -2  -2   2  240.03   14.64
   2   2  -1  824.18   71.64
   2   2  -1  887.86   71.08
   2  -2  -1  847.56   69.92
   2   2  -1  787.13   68.15
  -2  -2   1  873.87   74.64
  -2   2   1  853.72   71.33
  -2  -2   1  819.67   72.47
  -2  -2   1  891.30   74.38
   2  -2   0  252.51   16.02
   2   2   0  233.47   14.29
   2   2   0  187.12   14.18
   2   2   0  228.70   15.79
  -2  -2   0  229.06   15.16
  -2   2   0  245.87   12.69
  -2  -2   0  219.73   16.29
  -2  -2   0  222.14   13.67
   2   2   1   44.31    5.79
   2   2   1   38.55    5.07
   2  -2   1   40.83    4.08
   2   2   1   39.65    3.66
  -2  -2  -1   47.71    3.99
  -2  -2  -1   40.44    4.85
  -2   2  -1   34.91    3.46
  -2   2  -1   39.07    3.10
  -2  -2  -1   49.61    7.20
   2   2   2  521.90   34.94
   2   2   2  509.76   39.20
   2   2   2  527.63   43.09
   2  -2   2  507.49   37.99
  -2  -2  -2  546.92   48.02
  -2  -2  -2  574.65   42.06
  -2   2  -2  508.87   37.89
  -2  -2  -2  537.43   36.40
   2   2   3  201.04   15.87
   2   2   3  223.59   16.01
   2  -2   3  215.47   16.28
   2   2   3  208.43   12.17
   2   2   3  227.49   19.06
  -2  -2  -3  231.46   21.81
  -2  -2  -3  227.90   15.67
  -2   2  -3  217.60   15.37
   2  -2   4  103.15   10.31
   2   2   4  120.55    9.89
   2   2   4  118.73   15.05
   2   2   4   99.57   11.89
  -2  -2  -4  109.85   14.75
  -2   2  -4  100.24    7.66
  -2  -2  -4  121.71   11.18
   2   2   5  389.30   28.68
   2   2   5  338.70   31.67
   2  -2   5  358.90   26.63
  -2  -2  -5  383.81   27.26
  -2   2  -5  346.98   27.99
  -2  -2  -5  381.62   38.01
  -2  -2  -5  384.85   28.94
   2  -2   6   72.23    7.55
   2   2   6   97.68   11.25
   2   2   6   78.93    8.12
  -2  -2  -6   70.38    6.61
  -2   2  -6   83.09    6.81
  -2  -2  -6   65.38   13.37
  -2  -2  -6   77.06    9.24
   2   2   7    3.70    3.79
   2   2   7    1.05    4.99
   2  -2   7    0.50    3.77
  -2   2  -7   -2.95    2.87
  -2  -2  -7    1.62    3.28
  -2  -2  -7    8.20    6.99
  -2  -2  -7   -1.44    2.98
   2   2   8   56.92    7.18
   2  -2   8   70.72    7.78
   2   2   8   53.73    9.60
  -2  -2  -8   66.77   13.08
  -2  -2  -8   69.93    6.44
  -2   2  -8   51.07    6.04
   2   2   9  148.58   13.12
   2   2   9  140.47   15.82
   2  -2   9  162.09   13.54
  -2   2  -9  155.50   13.70
  -2  -2  -9  150.87   11.56
   2   2  10   11.61    7.29
   2  -2  10   24.42    7.18
   2   2  10   21.46    5.38
  -2   2 -10   23.88    4.14
  -2  -2 -10   25.24    4.31
   2   2  11   24.44    8.01
   2  -2  11   32.67    6.24
   2   2  11   29.12    7.93
  -2   2 -11   31.49    6.59
  -2  -2 -11   38.39    4.79
   2   2  12   43.33    9.74
   2  -2  12   55.57    7.27
   2   2  12   69.02    7.98
  -2   2 -12   46.81    6.35
  -2  -2 -12   49.27    5.74
   2  -2  13   22.17    5.45
   2   2  13   19.47    5.26
  -2  -2 -13   12.20    4.08
   2  -2  14   57.97    8.46
   2   2  14   59.58    8.06
   2  -2  15   47.72   10.02
   2   2  15   44.26    7.59
   2   2  16   14.25    9.16
   2  -2  16   37.43    7.08
   2   2  17   15.71    6.33
   2  -2  17   29.50    6.58
   2  -2  18   43.74    9.02
   2   2  18   53.12    8.53
   2  -2  19   80.17   11.77
   2   2  19   70.99    9.78
   2  -2  20   15.04    6.88
   2   2  20    2.86    6.13
   2   2  21   26.19    7.78
   2  -2  21   15.19    8.14
   2  -2  22   20.16    7.78
   2   2  22   -2.11    6.97
   2   2  23    4.23    6.57
   2  -2  23    2.23    7.25
   2   2  24  -13.34    7.29
   2  -2  24    5.10    8.13
   2  -2  25   22.32    9.26
   2   2  25    8.63    8.57
   2   2  26    8.88   10.06
   2  -2  26    1.20   10.94
   2  -2  27   10.00    8.15
   2   2  27    5.79    8.02
   2   2  28    5.72    8.03
   2  -2  28    6.04    9.10
   2  -2  29   18.97   11.06
   2   2  29   23.25   10.41
   2   2  30    6.09    8.85
   2  -2  30    1.66    8.75
   2  -2  31   -3.63   10.17
   2   2  31   17.90    9.40
   2  -2  32   -1.18   12.72
   2   2  32    5.17    9.66
   2   2  33    4.91   12.57
   2  -2  33    0.22   13.44
  -2  -3  35   -9.86   11.06
  -2   3  35   26.66   12.55
  -2   3  35    0.55   11.41
  -2  -3  34   12.86   10.84
  -2   3  34   -0.85   17.17
  -2   3  34    0.99    9.40
  -2   3  33   20.41   10.88
  -2  -3  33   26.12   12.22
  -2   3  33   30.09   18.02
  -2  -3  32    3.77   11.40
  -2   3  32   40.38   17.72
  -2   3  32   19.30   10.02
  -2  -3  31   -2.42    9.01
  -2   3  31    4.87   17.84
  -2   3  31   -0.22    7.74
  -2   3  30    0.46    7.39
  -2   3  30   10.28   11.79
  -2  -3  30   -0.32   12.44
  -2   3  29   20.36   11.85
  -2  -3  29   21.76   10.59
  -2   3  29   21.29   17.84
  -2   3  28    4.88    9.22
  -2   3  28   -5.56    8.68
  -2  -3  28    0.06    7.86
  -2  -3  27   -3.67    4.60
  -2   3  27   26.21   12.20
  -2   3  27   13.73    7.36
  -2  -3  27   18.51    8.85
  -2   3  26    6.13    7.07
  -2  -3  26   -3.46    4.13
  -2   3  26    3.88    6.32
  -2  -3  26    2.99    7.63
  -2   3  25   25.71    8.76
  -2  -3  25   17.20    5.39
  -2   3  25   26.73    7.67
  -2  -3  25   22.05    9.59
  -2  -3  24    5.52    8.08
  -2  -3  24   21.45   11.47
  -2   3  24   15.36    9.60
  -2   3  24   18.08    6.74
  -2  -3  23    6.45    6.80
  -2   3  23    1.22    7.60
  -2   3  23    2.05    5.81
  -2  -3  23    7.86    6.60
  -2   3  22    6.21    5.82
  -2   3  22   11.47    7.95
  -2  -3  22   10.60    6.38
  -2  -3  22    9.12    7.23
  -2   3  21    3.53    6.06
  -2  -3  21   -2.71    5.44
  -2  -3  21    6.47    5.83
  -2   3  21   -3.49    4.54
  -2  -3  20   -5.45    5.47
  -2   3  20    1.22    6.43
  -2   3  20   -0.55    4.73
  -2  -3  20    0.49    5.35
  -2   3  19   28.63    5.50
  -2   3  19    8.50    7.23
  -2  -3  19   21.53    9.55
  -2  -3  19   13.23    6.80
  -2  -3  18   -1.68    2.90
  -2   3  18   -4.08    4.20
  -2  -3  18   -1.41    5.61
  -2   3  18    2.91    4.36
   2  -3 -17   38.52    6.63
  -2   3  17   37.81    7.88
  -2  -3  17   45.85    7.15
  -2   3  17   34.29    6.08
  -2  -3  17   18.83    4.23
   2  -3 -16   34.42    4.98
  -2   3  16   52.62    8.04
  -2  -3  16   50.60    7.80
  -2   3  16   36.52    6.14
   2  -3 -15   -0.06    2.71
  -2   3  15    3.72    3.69
  -2  -3  15   -8.45    4.46
  -2   3  15   -5.45    4.80
   2   3 -14   54.11    7.03
   2  -3 -14   71.21    7.80
  -2  -3  14   94.56    9.73
  -2   3  14   86.98    9.76
  -2   3  14   84.05    9.98
   2   3 -13   10.63    4.06
   2  -3 -13   10.00    3.35
  -2   3  13    7.94    3.92
  -2   3  13   12.44    3.57
  -2  -3  13    8.46    4.99
   2  -3 -12  223.48   14.96
   2   3 -12  184.34   15.28
  -2  -3  12  214.12   18.33
  -2   3  12  213.82   15.45
  -2   3  12  193.53   14.62
   2  -3 -11   40.14    5.46
   2   3 -11   43.97    5.71
  -2  -3  11   49.90    7.28
  -2   3  11   46.88    5.34
  -2  -3  11   50.58    7.29
  -2   3  11   42.30    6.79
   2   3 -10   29.22    6.23
   2  -3 -10   24.78    4.47
  -2   3  10   28.37    5.11
  -2   3  10   27.19    4.00
  -2  -3  10   22.14    6.05
   2   3  -9   31.11    5.12
   2  -3  -9   44.46    4.97
  -2  -3   9   43.16    6.83
  -2   3   9   38.70    4.03
  -2   3   9   36.85    5.85
   2  -3  -8  241.59   16.46
   2   3  -8  274.24   19.49
   2  -3  -8  239.76   16.64
   2   3  -8  279.82   19.93
  -2   3   8  267.58   19.53
  -2  -3   8  205.18   18.78
  -2   3   8  276.77   18.60
   2  -3  -7  166.23   10.20
   2   3  -7  174.63   12.69
   2   3  -7  164.04   16.65
   2  -3  -7  157.19   10.09
  -2   3   7  165.70   10.83
  -2   3   7  165.62   11.08
  -2   3   7  154.04   14.24
  -2  -3   7  170.87   13.80
   2  -3  -6  176.44   10.37
   2  -3  -6  170.68    9.49
   2   3  -6  157.50   15.30
   2   3  -6  116.95   11.12
  -2   3   6  167.46    9.96
  -2   3   6  188.92   13.47
  -2  -3   6  181.27   13.58
  -2   3   6  160.61   12.52
   2  -3  -5  160.01    9.13
   2   3  -5  142.30   10.98
   2  -3  -5  152.09    8.17
   2   3  -5  123.55   12.67
  -2  -3   5  157.33   12.53
  -2   3   5  137.46    7.54
  -2   3   5  138.92   11.38
  -2   3   5  135.78    9.85
   2  -3  -4   94.03    4.75
   2   3  -4   94.21    7.91
   2  -3  -4   99.58    6.34
   2   3  -4   88.42   10.36
  -2  -3   4   98.61   10.04
  -2   3   4   86.95    6.47
  -2  -3   4   92.80    8.79
   2  -3  -3  305.87   18.81
   2  -3  -3  286.29   13.79
   2   3  -3  331.10   25.00
   2   3  -3  285.84   23.08
  -2  -3   3  309.97   22.16
  -2  -3   3  352.83   27.96
  -2   3   3  285.56   18.59
   2  -3  -2   88.42    5.82
   2   3  -2  107.80    7.81
   2   3  -2   82.32    8.43
  -2  -3   2   89.05    8.23
  -2  -3   2   81.40    7.98
  -2   3   2   86.43    8.08
  -2  -3   2   87.17    6.49
   2   3  -1   29.65    5.55
   2  -3  -1   32.42    3.69
   2  -3  -1   36.32    4.15
   2   3  -1   31.13    4.97
  -2  -3   1   35.41    3.57
  -2  -3   1   35.23    5.98
  -2  -3   1   29.55    4.94
   2  -3   0   85.49    5.36
   2  -3   0   82.78    5.21
   2   3   0  103.55    8.67
   2   3   0   81.39    7.83
   2   3   0   86.08    5.71
  -2  -3   0   87.53    9.14
  -2  -3   0   87.62    7.66
  -2   3   0   85.09    5.74
  -2   3   0   88.60    8.61
  -2  -3   0   87.65    6.19
   2   3   1  270.14   20.73
   2   3   1  292.34   18.04
   2   3   1  304.83   23.01
   2  -3   1  310.96   19.21
  -2  -3  -1  338.32   26.32
  -2  -3  -1  309.85   21.77
  -2   3  -1  304.29   18.70
   2   3   2   87.89    8.38
   2  -3   2   95.62    7.72
   2   3   2   90.50    9.11
  -2  -3  -2   92.68   11.09
  -2  -3  -2  100.50    7.92
  -2  -3  -2   88.46    5.55
  -2   3  -2   86.65    6.96
   2  -3   3  159.26   11.94
   2   3   3  143.03   11.42
   2   3   3  126.10    7.14
   2   3   3  116.40   12.49
  -2  -3  -3  151.12   10.84
  -2  -3  -3  167.60   16.07
  -2   3  -3  133.01    8.62
   2  -3   4  171.15   11.91
   2   3   4  165.96   15.57
   2   3   4  177.93   16.37
   2   3   4  169.07   15.57
   2   3   4  161.35    8.96
  -2  -3  -4  186.82   12.96
  -2  -3  -4  159.57   22.36
  -2   3  -4  159.58   10.76
   2   3   5  175.00   15.57
   2  -3   5  155.26   14.14
   2   3   5  170.63   16.28
  -2   3  -5  157.60   11.34
  -2  -3  -5  179.02   24.02
  -2  -3  -5  168.30   11.87
   2   3   6  236.65   18.16
   2   3   6  212.08   20.83
   2  -3   6  250.11   18.82
  -2   3  -6  252.68   17.37
  -2  -3  -6  254.18   19.60
  -2  -3  -6  243.14   17.65
  -2  -3  -6  250.65   26.02
   2   3   7   34.84    5.97
   2   3   7   39.33    8.23
   2  -3   7   40.93    5.90
  -2  -3  -7   57.21   10.65
  -2   3  -7   28.00    4.72
  -2  -3  -7   43.45    5.24
  -2  -3  -7   48.27    6.10
   2  -3   8   23.94    5.23
   2   3   8   12.90    6.80
   2   3   8   26.57    5.18
  -2  -3  -8   26.76    4.29
  -2  -3  -8   30.42    6.83
  -2   3  -8   26.41    5.66
  -2  -3  -8   27.70    9.24
   2  -3   9   53.85    6.85
   2   3   9   61.06    6.44
   2   3   9   52.05    9.00
  -2  -3  -9   46.74    5.67
  -2  -3  -9   35.35    6.24
  -2   3  -9   48.24    5.60
  -2  -3  -9   49.38   11.05
   2   3  10  215.12   21.64
   2   3  10  200.68   16.44
   2  -3  10  210.95   20.38
  -2  -3 -10  209.48   16.01
  -2   3 -10  186.38   14.69
   2  -3  11   14.98    4.76
   2   3  11    8.51    8.59
   2   3  11   13.73    4.78
  -2  -3 -11    2.91    4.74
  -2   3 -11   10.73    3.49
   2   3  12   83.02    8.96
   2  -3  12   80.84    9.12
   2   3  12   72.13   11.15
  -2   3 -12   62.46    7.13
  -2  -3 -12   72.74    7.34
   2  -3  13    2.09    4.66
   2   3  13    4.95    4.52
   2   3  14   37.83    7.11
   2  -3  14   36.60    6.67
   2   3  15   37.15    7.10
   2  -3  15   49.46    7.51
   2   3  16    6.52    5.32
   2  -3  16    7.79    5.57
   2  -3  17   30.10    6.68
   2   3  17   16.16    6.16
   2  -3  18    1.67    7.20
   2   3  18   -0.02    4.60
   2  -3  19    3.34    5.72
   2   3  19   -1.54    6.82
   2   3  20    4.31    6.22
   2  -3  20   18.34    6.60
   2  -3  21   -8.04    9.18
   2   3  21   -3.37    8.16
   2  -3  22   33.49    8.39
   2   3  22    8.34    7.56
   2   3  23   20.58   10.87
   2  -3  23   25.27    8.50
   2  -3  24    4.04   10.65
   2   3  24   -6.22    6.72
   2  -3  25   61.43   12.30
   2   3  25   33.73   10.33
   2  -3  26   -1.84    8.38
   2   3  26   -5.08    9.77
   2  -3  27   16.23    9.72
   2   3  27    6.90    9.05
   2  -3  28   21.81   11.30
   2   3  28   -8.69    7.19
   2  -3  29   -1.85    8.58
   2   3  29   -1.76    8.18
   2  -3  30   19.69   12.33
   2   3  30   26.48   10.22
   2   3  31   15.65   12.06
   2  -3  31   -5.23    9.44
   2   3  32   -1.25    9.40
   2  -3  32   -3.37   12.89
   2  -3  33   16.83   10.76
   2   3  33   -7.15    9.54
  -2  -4  35  -10.18   12.06
  -2   4  35   -3.81   12.88
  -2   4  34   -4.10   13.02
  -2   4  34   -6.07   22.69
  -2  -4  34  -12.56   11.30
  -2   4  33    5.31   13.33
  -2   4  33    9.32   11.15
  -2  -4  33   -1.66    9.73
  -2   4  32   -5.06   12.57
  -2  -4  32    1.56    8.88
  -2   4  32    1.91   10.12
  -2  -4  31   -0.95    9.00
  -2   4  31   11.40   12.08
  -2   4  31    1.84   10.68
  -2   4  30   22.47    8.40
  -2  -4  30   22.44   13.57
  -2   4  30   -3.17    9.27
  -2   4  29   15.36    8.08
  -2  -4  29    1.13   10.22
  -2   4  29   30.33   12.27
  -2   4  28   26.79    9.55
  -2   4  28   20.40   11.81
  -2  -4  28   23.72   11.00
  -2   4  27    3.60    6.54
  -2  -4  27    4.83    8.25
  -2   4  27    3.64    6.72
  -2   4  26   19.48   10.79
  -2   4  26   21.66    8.41
  -2  -4  26   16.12    9.81
  -2   4  25   19.57   11.87
  -2   4  25   38.82    8.70
  -2  -4  25   50.17   10.19
  -2   4  24   -4.95    6.95
  -2   4  24   -4.40    5.66
  -2  -4  24    6.78    7.05
  -2   4  23    1.84    5.75
  -2   4  23    1.90    7.30
  -2  -4  23    5.30    6.75
  -2   4  22   27.51    9.30
  -2   4  22   28.62    6.88
  -2  -4  22   20.15    8.54
  -2  -4  21   11.59    6.10
  -2   4  21   -4.11    4.98
  -2   4  21    0.34    6.04
  -2  -4  20   27.04    7.10
  -2   4  20   10.03    5.58
  -2   4  20   16.34    5.13
  -2   4  19   34.92    6.36
  -2  -4  19   24.02    7.88
  -2   4  19   19.12    7.95
  -2   4  18   49.20    7.22
  -2   4  18   58.99    7.51
  -2  -4  18   42.21    8.67
   2  -4 -17   25.62    6.16
  -2  -4  17   36.64   10.37
  -2   4  17   19.15   11.49
  -2   4  17   38.55    5.67
  -2   4  17   40.01    6.32
   2  -4 -16  169.02   16.72
  -2   4  16  207.79   16.71
  -2   4  16  172.87   24.02
  -2  -4  16  224.89   19.68
  -2   4  16  213.04   17.05
   2  -4 -15  133.51   12.55
  -2  -4  15  139.23   14.00
  -2   4  15  130.59   15.33
  -2   4  15  144.72   13.49
  -2   4  15  157.05   14.24
   2  -4 -14    1.71    2.59
  -2   4  14    1.98    2.87
  -2  -4  14    0.41    4.61
  -2   4  14    0.35    4.65
  -2   4  14    2.65    4.44
   2  -4 -13   11.64    3.76
   2   4 -13    8.46    4.19
  -2  -4  13   13.13    5.42
  -2   4  13   14.39    4.67
  -2   4  13    8.57    6.93
  -2   4  13   14.80    3.63
   2   4 -12    7.02    3.46
   2  -4 -12   10.40    3.48
  -2  -4  12    3.53    6.43
  -2   4  12    5.40    6.14
  -2   4  12    3.86    3.66
  -2   4  12    3.34    4.13
   2  -4 -11    9.12    3.50
   2   4 -11   12.41    3.94
  -2   4  11    8.09    5.96
  -2  -4  11    3.58    4.64
  -2   4  11   13.33    3.11
  -2   4  11    8.07    2.99
   2   4 -10    9.00    3.89
   2  -4 -10   13.41    2.66
  -2   4  10   12.67    5.78
  -2  -4  10   18.51    4.99
  -2   4  10   11.94    4.03
  -2   4  10   18.79    4.19
   2  -4  -9   48.17    4.57
   2   4  -9   44.16    5.30
   2  -4  -9   43.82    4.35
  -2   4   9   34.20    4.96
  -2   4   9   28.72    5.38
  -2  -4   9   33.51    6.68
  -2   4   9   40.30    7.83
   2  -4  -8   77.85    5.76
   2  -4  -8   77.94    6.12
   2   4  -8   71.97    9.86
   2   4  -8   73.01    7.36
  -2  -4   8   78.63    8.47
  -2   4   8   66.52    8.29
  -2   4   8   64.46    6.10
  -2   4   8   67.03    6.69
   2   4  -7   24.16    4.85
   2  -4  -7   37.39    4.41
   2  -4  -7   32.50    3.44
   2   4  -7   40.80    7.22
  -2   4   7   21.92    5.40
  -2  -4   7   52.40    6.38
  -2   4   7   28.18    4.82
   2   4  -6  141.05   11.22
   2  -4  -6  138.58    8.14
   2  -4  -6  149.13   10.41
   2   4  -6  162.29   17.95
  -2  -4   6  155.67   12.45
  -2   4   6  133.51   11.85
  -2   4   6  143.22   10.65
   2  -4  -5  100.33    5.98
   2   4  -5  102.53   10.90
   2  -4  -5   88.70    7.57
   2   4  -5   97.33    8.46
  -2  -4   5  100.35    9.30
  -2   4   5   92.52    7.62
  -2   4   5   97.28    5.87
  -2  -4   5  101.74   10.28
   2  -4  -4   65.88    4.08
   2  -4  -4   74.43    6.26
   2   4  -4   81.25    8.73
   2   4  -4   69.63    6.62
  -2   4   4   72.13    6.83
  -2  -4   4   77.90    8.23
  -2   4   4   66.54    4.31
  -2  -4   4   64.74    7.57
   2  -4  -3  128.04    8.32
   2  -4  -3  124.56   13.47
   2   4  -3  151.86   16.01
   2   4  -3  163.41   11.30
  -2  -4   3  142.92   14.94
  -2   4   3  159.50   12.34
  -2  -4   3  138.10   11.99
  -2   4   3  138.96    9.09
   2   4  -2  142.46   12.76
   2  -4  -2  176.78   12.61
   2  -4  -2  169.99   11.35
   2   4  -2  156.12   11.60
  -2  -4   2  144.57   12.07
  -2  -4   2  153.45   12.53
   2   4  -1   73.90    7.85
   2  -4  -1   69.65    6.97
   2   4  -1   70.65    6.72
   2  -4  -1   63.86    4.44
  -2  -4   1   59.45    8.19
  -2   4   1   79.69    7.83
  -2   4   1   73.96    4.99
  -2  -4   1   74.66    6.29
  -2   4   1   70.55    4.58
   2   4   0  157.91   12.37
   2  -4   0  143.76    8.68
   2   4   0  155.62   11.49
  -2  -4   0  166.97   12.16
  -2  -4   0  161.69   10.28
  -2   4   0  146.52   12.18
  -2   4   0  155.75    8.71
  -2  -4   0  154.31   13.31
   2  -4   1  130.23    9.07
   2   4   1  138.28   11.64
   2   4   1  136.71   10.86
  -2  -4  -1  123.56   10.20
  -2  -4  -1  133.26   13.21
  -2   4  -1  154.52    9.36
   2   4   2   76.08    8.16
   2   4   2   88.39    8.10
   2  -4   2   74.60    6.86
  -2   4  -2   77.50    6.28
  -2  -4  -2   79.53    7.00
  -2  -4  -2   65.06    9.45
   2   4   3  110.27    9.22
   2   4   3   90.59    9.50
   2   4   3   93.80    4.80
   2  -4   3  102.09    8.89
  -2  -4  -3  105.68   12.46
  -2   4  -3   96.07    6.47
  -2  -4  -3  102.62    8.41
   2   4   4  132.12   13.99
   2   4   4  128.83   13.91
   2   4   4  132.87   12.54
   2  -4   4  153.46   10.63
  -2   4  -4  136.65   10.57
  -2  -4  -4  147.36   20.04
  -2  -4  -4  163.33   11.50
   2  -4   5   29.68    4.90
   2   4   5   26.70    2.37
   2   4   5   35.23    5.17
   2   4   5   33.50    6.36
   2   4   5   26.91    7.07
  -2   4  -5   39.52    4.20
  -2  -4  -5   41.50    9.16
  -2  -4  -5   32.03    4.49
   2   4   6   62.25    4.28
   2   4   6   53.81   11.16
   2  -4   6   96.17    9.20
   2   4   6   55.49    6.89
  -2   4  -6   69.21    5.77
  -2  -4  -6   77.56    8.33
  -2  -4  -6   72.47   11.92
   2   4   7   32.46    7.27
   2  -4   7   40.34    7.90
   2   4   7   42.40    7.89
  -2   4  -7   41.83    6.22
  -2  -4  -7   44.11    9.85
  -2  -4  -7   62.28    7.28
  -2  -4  -7   45.67    5.33
   2   4   8   10.46    5.75
   2  -4   8   13.88    4.43
   2   4   8   21.76    4.61
  -2  -4  -8   19.58    6.65
  -2  -4  -8   14.86    3.73
  -2   4  -8   11.11    3.28
  -2  -4  -8   10.57    7.91
   2   4   9   19.29    5.96
   2  -4   9   15.60    6.31
   2   4   9   12.91    6.00
  -2   4  -9   16.09    3.48
  -2  -4  -9   11.95    3.85
  -2  -4  -9    4.93   11.03
  -2  -4  -9   10.60    4.82
   2  -4  10    4.49    4.10
   2   4  10    3.78    3.91
   2   4  10    2.37    5.56
  -2  -4 -10   10.00    7.07
  -2  -4 -10    3.82    3.35
  -2   4 -10    6.00    3.40
  -2  -4 -10    1.10    4.07
   2   4  11    6.31    6.13
   2  -4  11    8.23    4.90
   2   4  11   10.31    4.44
  -2  -4 -11   29.85    8.09
  -2  -4 -11   14.23    5.93
  -2  -4 -11    6.38    3.73
  -2   4 -11    8.42    3.75
   2  -4  12    9.43    4.31
   2   4  12   -1.63    5.76
   2   4  12    4.66    4.16
  -2  -4 -12   -0.27    3.23
  -2  -4 -12    2.80    4.05
   2   4  13  161.43   16.95
   2  -4  13  140.98   17.47
  -2  -4 -13  148.08   14.58
   2   4  14  199.31   17.82
   2  -4  14  198.19   18.12
   2   4  15   39.46    6.75
   2  -4  15   37.39    7.32
   2   4  16   52.68    7.93
   2  -4  16   48.41    8.53
   2  -4  17   15.80    6.54
   2   4  17   21.39    6.26
   2   4  18   22.67    6.66
   2  -4  18   22.09    7.17
   2   4  19   24.29    6.56
   2  -4  19    5.02    9.63
   2  -4  20   35.55    8.30
   2   4  20   31.10   10.51
   2   4  21   -0.21    5.33
   2  -4  21   -1.84    6.16
   2  -4  22   -0.09    6.34
   2   4  22    4.34    5.58
   2  -4  23   29.08   10.10
   2   4  23   36.31    8.62
   2   4  24   17.54    8.62
   2  -4  24   23.53    9.14
   2   4  25   20.45    8.27
   2  -4  25    7.93    8.63
   2  -4  26   10.34   12.33
   2   4  26   19.80   11.75
   2  -4  27    2.95    8.75
   2   4  27    7.14    7.61
   2  -4  28    6.16    8.40
   2   4  28   -0.14    7.99
   2   4  29   19.44   13.01
   2  -4  29   13.55   15.87
   2  -4  30    9.72    8.34
   2   4  30  -10.73    8.45
   2  -4  31    9.97   10.25
   2   4  31    3.37    9.32
   2   4  32   -7.33    9.30
   2  -4  32    4.83    9.67
   2   4  33    1.16   13.63
   2  -4  33    9.67   11.12
  -2  -5  34   13.79   11.45
  -2   5  34    6.92    9.98
  -2  -5  33   11.35   12.26
  -2   5  33   26.61   10.19
  -2   5  33    4.53   13.70
  -2   5  32   -1.71   10.66
  -2   5  32    4.71    8.00
  -2  -5  32   -0.07    9.92
  -2  -5  31    0.86    9.42
  -2  -5  31    4.22    9.56
  -2   5  31    1.04   10.22
  -2   5  31   -2.33    7.54
  -2   5  30  -15.94    7.03
  -2  -5  30   -1.26    9.00
  -2   5  30   16.57    7.21
  -2   5  29    5.34    8.42
  -2  -5  29   24.99   10.25
  -2   5  29   19.80   11.79
  -2  -5  28    8.02    9.60
  -2   5  28   21.71   10.01
  -2   5  28    4.83    7.38
  -2  -5  27    0.84    8.68
  -2   5  27   -0.12    6.62
  -2   5  27   15.54    6.84
  -2   5  26   17.27    8.54
  -2  -5  26   34.15   10.82
  -2   5  26   24.66    8.67
  -2  -5  25    6.77    7.58
  -2   5  25    1.58    6.10
  -2   5  25   -1.21    5.60
  -2   5  24    1.63    6.50
  -2  -5  24   17.47    8.41
  -2   5  24   14.65    6.18
  -2  -5  23   15.26    7.89
  -2   5  23    5.76    5.90
  -2  -5  22   12.10    8.55
  -2   5  22    9.03    8.00
  -2   5  22   25.18    6.33
  -2   5  21   -7.45    4.87
  -2  -5  21    1.33    6.30
  -2   5  21    1.09    5.78
  -2   5  20    3.90    6.17
  -2  -5  20   12.38    6.58
  -2   5  20   10.40    6.92
  -2   5  19    8.85    4.58
  -2  -5  19   14.32    6.78
  -2   5  19   14.05    6.50
  -2  -5  18   63.07   10.04
  -2   5  18   64.95    7.38
  -2   5  18   59.21    7.59
   2  -5 -17   42.15    5.71
  -2   5  17   48.66    7.68
  -2   5  17   54.33    9.95
  -2  -5  17   47.39    8.84
  -2   5  17   48.34    8.90
   2  -5 -16   21.28    5.17
  -2  -5  16   33.13    8.32
  -2   5  16   24.84    9.50
  -2   5  16   20.79    5.42
  -2   5  16   12.17    6.21
   2  -5 -15   96.97    8.15
  -2   5  15   94.32    8.72
  -2   5  15   76.98   12.10
  -2  -5  15  106.01   13.61
  -2   5  15   89.11    9.65
   2  -5 -14   33.14    3.97
  -2   5  14   22.51    5.47
  -2  -5  14   34.85    6.22
  -2   5  14   37.99    6.81
  -2   5  14   24.65    3.82
   2  -5 -13    8.87    2.98
  -2   5  13    6.51    6.81
  -2   5  13   16.95    4.52
  -2  -5  13   12.20    5.08
  -2   5  13    7.70    4.06
   2  -5 -12   34.69    4.91
   2   5 -12   31.21    5.25
  -2   5  12   38.39    5.85
  -2   5  12   25.47    4.87
  -2   5  12   35.98    5.86
  -2  -5  12   34.38    7.91
   2   5 -11   32.74    5.84
   2  -5 -11   59.14    5.62
  -2   5  11   55.98    6.23
  -2  -5  11   56.84    7.33
  -2   5  11   45.18    5.97
  -2   5  11   77.21    7.34
   2  -5 -10   29.56    4.54
   2   5 -10   45.54    5.58
  -2  -5  10   42.78    6.29
  -2   5  10   40.58    5.19
  -2   5  10   39.61    7.00
  -2   5  10   39.20    4.81
   2   5  -9  166.32   13.51
   2  -5  -9  182.55   11.76
   2   5  -9  167.68   17.04
   2  -5  -9  168.91   11.47
  -2  -5   9  162.17   14.73
  -2   5   9  182.72   15.81
  -2   5   9  185.80   12.83
  -2   5   9  173.27   12.49
   2   5  -8  173.56   16.57
   2   5  -8  150.09   12.79
   2  -5  -8  178.10   10.95
   2  -5  -8  192.12   12.35
  -2  -5   8  172.36   14.23
  -2   5   8  170.11   11.77
  -2   5   8  165.73   14.20
  -2   5   8  179.51   11.73
   2  -5  -7  282.43   18.98
   2  -5  -7  288.93   18.26
   2   5  -7  296.46   22.43
   2   5  -7  280.81   24.95
  -2   5   7  307.86   19.24
  -2  -5   7  292.39   23.37
  -2   5   7  304.23   22.64
  -2   5   7  309.27   20.21
   2   5  -6  150.54   14.54
   2   5  -6  154.47   11.56
   2  -5  -6  153.40    8.68
   2  -5  -6  137.56    9.59
  -2   5   6  157.29    8.93
  -2  -5   6  143.32   12.81
  -2   5   6  152.54   10.54
  -2   5   6  148.32   10.08
   2   5  -5   51.46    5.78
   2  -5  -5   49.22    3.50
   2  -5  -5   44.86    4.84
   2  -5  -5   38.68    5.91
   2   5  -5   50.15    7.68
   2  -5  -5   51.72    7.20
  -2  -5   5   49.37    7.02
  -2   5   5   50.11    5.11
  -2   5   5   48.54    4.40
  -2   5   5   44.41    3.32
  -2  -5   5   56.02    6.85
   2   5  -4   36.12    6.36
   2  -5  -4   29.07    3.33
   2   5  -4   38.72    6.34
   2  -5  -4   21.36    8.22
   2  -5  -4   23.88    3.22
   2  -5  -4   30.48    4.62
  -2   5   4   45.17    5.65
  -2  -5   4   35.79    7.72
  -2   5   4   33.80    3.06
  -2   5   4   35.34    3.19
  -2  -5   4   42.44    5.87
   2   5  -3   57.48    6.33
   2  -5  -3   87.45    7.00
   2   5  -3   72.83   11.10
   2  -5  -3   66.62    8.13
   2  -5  -3   76.75    6.27
  -2   5   3   67.67    4.41
  -2  -5   3   76.76    9.91
  -2  -5   3   84.30   10.30
  -2   5   3   68.81    4.34
   2  -5  -2   19.14    3.01
   2   5  -2   20.02    4.71
   2  -5  -2   11.89    3.24
   2   5  -2   18.50    3.95
  -2   5   2   12.52    2.86
  -2   5   2   12.28    2.03
  -2  -5   2   26.81    4.37
  -2  -5   2   17.60    4.86
   2   5  -1   55.23    7.23
   2  -5  -1   56.80    6.41
   2  -5  -1   54.00    4.97
   2   5  -1   61.15    6.08
  -2   5   1   53.14    7.64
  -2  -5   1   53.58    7.10
  -2   5   1   66.12    4.14
  -2   5   1   56.13    4.72
  -2  -5   1   51.98    6.33
   2   5   0    9.88    3.83
   2   5   0   15.79    4.56
   2  -5   0   17.78    2.80
  -2   5   0   15.20    6.89
  -2  -5   0   13.34    3.81
  -2  -5   0   17.25    5.30
  -2   5   0   11.78    4.40
  -2  -5   0   18.58    4.17
   2  -5   1   72.27    6.00
   2   5   1   64.42    7.56
   2   5   1   69.26    6.96
  -2  -5  -1   87.13    9.50
  -2  -5  -1   83.77    7.38
  -2   5  -1   67.41    5.36
   2  -5   2   25.63    3.61
   2   5   2   38.74    6.91
   2   5   2   35.22    5.63
  -2   5  -2   37.18    4.26
  -2  -5  -2   34.20    6.14
  -2  -5  -2   40.04    7.41
   2  -5   3   59.52    5.14
   2   5   3   54.45    6.56
   2   5   3   47.34    8.53
  -2  -5  -3   44.17    5.59
  -2   5  -3   52.56    5.51
  -2  -5  -3   56.70   11.22
   2   5   4  147.01   16.58
   2  -5   4  153.94   11.16
   2   5   4  163.48   12.49
   2   5   4  149.29   12.73
  -2  -5  -4  141.29   15.13
  -2   5  -4  156.27   11.43
  -2  -5  -4  157.02   11.45
   2  -5   5  286.90   24.19
   2   5   5  296.15   27.25
   2   5   5  304.13   25.57
   2   5   5  321.82   28.69
  -2  -5  -5  278.78   28.34
  -2   5  -5  284.33   19.99
  -2  -5  -5  298.10   24.31
   2   5   6  144.27    6.56
   2   5   6  157.78   16.12
   2   5   6  166.06   14.76
   2  -5   6  175.24   15.24
   2   5   6  170.40   14.45
  -2   5  -6  160.81   11.39
  -2  -5  -6  182.04   22.06
  -2  -5  -6  167.18   12.30
   2  -5   7  173.43   13.89
   2   5   7  160.47   12.85
   2   5   7  157.35   17.97
  -2  -5  -7  162.89   18.58
  -2  -5  -7  161.27   14.20
  -2   5  -7  169.13   12.22
   2   5   8   39.22    7.23
   2   5   8   33.77    5.70
   2  -5   8   46.22    8.46
  -2  -5  -8   41.98    5.26
  -2  -5  -8   52.67   12.46
  -2   5  -8   34.15    6.14
   2  -5   9   54.48    6.95
   2   5   9   46.64   10.26
   2   5   9   47.66    8.00
  -2  -5  -9   65.36   14.09
  -2  -5  -9   52.56    7.23
  -2   5  -9   39.99    5.24
  -2  -5  -9   66.59    9.76
   2  -5  10   29.25    5.47
   2   5  10   49.33    7.32
   2   5  10   32.48    5.78
  -2   5 -10   31.03    5.92
  -2  -5 -10   60.02    9.78
  -2  -5 -10   32.89    8.19
  -2  -5 -10   33.35    4.97
   2   5  11    5.75    5.74
   2   5  11    6.53    5.53
   2  -5  11   11.25    4.87
  -2   5 -11    7.81    3.67
  -2  -5 -11    1.68    7.44
  -2  -5 -11   15.11    5.02
  -2  -5 -11    6.81    3.84
   2  -5  12   22.84    6.63
   2   5  12   28.17    7.07
  -2  -5 -12   68.47   10.41
  -2  -5 -12   23.73    8.25
  -2  -5 -12   24.83    4.83
   2  -5  13  108.14   11.35
   2   5  13   87.58   10.07
   2  -5  14   36.43    6.83
   2   5  14   24.38    5.88
   2  -5  15   43.27    8.49
   2   5  15   53.42    7.30
   2  -5  16   67.02    9.78
   2   5  16   54.03   11.17
   2   5  17    5.86    7.38
   2  -5  17   13.31    8.12
   2  -5  18   12.34    6.21
   2   5  18    5.33    7.39
   2   5  19   -1.98    7.23
   2  -5  19   -2.83    5.98
   2  -5  20   18.34    8.04
   2   5  20   24.17    7.30
   2   5  21    2.11    5.93
   2  -5  21    9.33    6.74
   2  -5  22    8.07    7.46
   2   5  22    8.35    6.64
   2  -5  23    4.99    7.12
   2   5  23    5.91    6.94
   2  -5  24    9.08   10.31
   2   5  24   41.39    9.92
   2   5  25   -1.31    6.41
   2  -5  25    6.28    7.70
   2   5  26   10.32    7.45
   2  -5  26   -0.92    8.41
   2  -5  27   13.56    8.86
   2   5  27    4.07    8.35
   2   5  28    5.67   11.65
   2  -5  28   14.81    9.64
   2   5  29    2.75    8.85
   2  -5  29   20.15   10.02
   2   5  30    9.60    9.82
   2  -5  30   10.73   14.32
   2  -5  31    5.48   10.98
   2   5  31   10.77    9.20
   2  -5  32    0.65   10.84
   2   5  32   11.66    9.91
  -2   6  34   26.52   10.69
  -2  -6  34    9.46   13.42
  -2   6  33   -1.54    8.91
  -2  -6  33  -13.12   11.39
  -2   6  32   13.86    9.53
  -2  -6  32    7.67   15.40
  -2   6  31   -1.31   10.49
  -2  -6  31   14.61   10.09
  -2   6  31   -2.62    7.72
  -2  -6  30    6.35    9.69
  -2   6  30    5.11   10.80
  -2   6  30    9.77    7.90
  -2   6  29    4.13    7.03
  -2  -6  29   18.20    8.98
  -2   6  29   -0.35    6.98
  -2  -6  28    4.35   11.27
  -2   6  28    3.52    8.53
  -2   6  28    0.50    7.00
  -2  -6  27   39.51   11.50
  -2   6  27   15.62   10.21
  -2   6  27   19.41   11.46
  -2  -6  26   13.42   10.63
  -2   6  26   39.84   10.18
  -2   6  26    8.59    9.36
  -2  -6  25   11.82    8.76
  -2   6  25    9.77    8.59
  -2   6  25    9.56    8.21
  -2  -6  24   23.01    8.65
  -2   6  24    6.45    6.15
  -2   6  24   12.88    6.83
  -2  -6  23    6.67    9.12
  -2   6  23   -0.23    5.63
  -2   6  23    0.26    5.13
  -2  -6  22   14.17    7.67
  -2   6  22    2.24    5.89
  -2   6  22    8.23    4.53
  -2  -6  21   -7.53    6.10
  -2   6  21   -2.06    6.55
  -2   6  21   -3.85    5.26
  -2   6  20    8.47    5.80
  -2  -6  20   15.17    6.93
  -2   6  20   20.74    5.42
  -2  -6  19    2.79    6.14
  -2   6  19   10.18    5.29
  -2   6  19   11.51    6.47
  -2  -6  18   23.45    7.32
  -2   6  18   27.60    5.71
  -2   6  18   21.39    6.83
   2  -6 -17   57.59    8.31
  -2   6  17   79.81    9.97
  -2   6  17   65.74   13.49
  -2   6  17   51.65    7.91
  -2  -6  17   91.41   10.63
   2  -6 -16   24.26    6.32
  -2   6  16   40.15   10.61
  -2  -6  16   44.42    7.33
  -2   6  16   45.00    5.55
  -2   6  16   30.39    5.63
   2  -6 -15   44.18    6.73
  -2   6  15   51.75    6.48
  -2  -6  15   57.09    8.06
  -2   6  15   52.67   10.80
  -2   6  15   58.98    7.49
   2  -6 -14   86.13    7.45
  -2   6  14   83.87    9.21
  -2  -6  14   90.85   10.21
  -2   6  14   78.29   12.77
  -2   6  14   82.51    7.87
   2  -6 -13    7.58    3.42
  -2  -6  13   -3.64    5.94
  -2   6  13    6.15    3.14
  -2   6  13   -1.21    4.06
  -2   6  13   -1.13    4.15
   2  -6 -12    8.39    3.16
  -2   6  12    4.46    5.98
  -2   6  12   10.09    4.05
  -2  -6  12    8.34    4.89
  -2   6  12    8.47    3.25
   2   6 -11   11.40    5.48
   2  -6 -11   15.91    3.52
   2   6 -11   12.21    6.48
  -2   6  11   11.23    3.97
  -2   6  11   18.90    5.71
  -2   6  11   12.47    3.46
  -2  -6  11   12.78    5.08
   2  -6 -10   35.46    4.52
   2   6 -10   41.52    5.58
   2   6 -10   39.03    5.80
   2   6 -10   45.68    8.17
   2  -6 -10   39.86    4.19
  -2   6  10   40.23    4.86
  -2   6  10   36.48    4.27
  -2   6  10   34.32    6.26
  -2  -6  10   36.69    6.13
   2   6  -9   12.31    4.28
   2  -6  -9   19.69    3.24
   2  -6  -9   26.86    3.36
   2   6  -9   24.87    6.58
  -2   6   9   24.49    4.26
  -2   6   9   15.39    5.67
  -2  -6   9   24.19    5.06
  -2   6   9   21.53    3.49
   2  -6  -8   39.78    7.09
   2  -6  -8   48.47    6.83
   2  -6  -8   28.79    4.77
   2   6  -8   41.56    5.53
   2   6  -8   37.11    7.20
   2  -6  -8   33.00    4.66
  -2   6   8   41.34    4.37
  -2   6   8   40.21    4.06
  -2  -6   8   36.09    6.10
  -2   6   8   29.52    4.90
   2   6  -7  158.67   15.36
   2   6  -7  168.82   15.15
   2  -6  -7  141.73   13.16
   2  -6  -7  148.94   10.03
   2  -6  -7  131.83   17.56
  -2   6   7  160.08   11.99
  -2   6   7  164.23    9.86
  -2   6   7  168.97   10.67
  -2  -6   7  166.38   13.71
   2   6  -6   64.57    9.03
   2   6  -6   67.26    6.95
   2  -6  -6   71.76    6.48
   2  -6  -6   60.65    8.69
  -2  -6   6   69.61    7.40
  -2   6   6   56.21    4.33
  -2   6   6   74.24    5.65
   2  -6  -5   89.67    9.07
   2  -6  -5   93.44    6.60
   2  -6  -5   82.73    6.08
   2   6  -5   97.56    9.92
   2  -6  -5   79.80   10.06
   2   6  -5  103.37    8.24
  -2   6   5   84.53    5.47
  -2  -6   5   76.29    8.97
  -2   6   5   88.01    5.56
  -2  -6   5   95.20    8.92
   2   6  -4  101.50    8.13
   2  -6  -4   77.98   10.14
   2  -6  -4   93.82    6.49
   2   6  -4  109.86   12.73
   2  -6  -4   93.32    7.28
   2  -6  -4   89.69    7.28
  -2  -6   4  105.68   12.12
  -2   6   4  118.24    6.91
  -2   6   4  105.87    6.89
  -2  -6   4   78.20    9.20
   2  -6  -3   11.81    3.78
   2   6  -3    7.85    3.61
   2   6  -3   11.55    6.67
   2  -6  -3   13.19    3.59
  -2   6   3   12.44    2.64
  -2  -6   3   13.55    6.12
  -2   6   3   16.83    2.56
  -2  -6   3   19.92    6.30
   2  -6  -2   38.75    4.11
   2   6  -2   34.11    4.97
   2  -6  -2   47.21    4.97
   2   6  -2   31.08    6.09
  -2   6   2   39.82    3.35
  -2  -6   2   35.30    5.77
  -2   6   2   41.56    3.94
  -2   6   2   45.29    7.27
  -2  -6   2   38.14    5.73
   2   6  -1   35.04    5.63
   2   6  -1   35.81    5.89
   2  -6  -1   31.99    3.71
   2  -6  -1   21.36    3.46
  -2   6   1   30.99    3.06
  -2   6   1   29.74    6.58
  -2  -6   1   37.73    5.80
  -2  -6   1   31.37    6.83
  -2   6   1   26.70    3.81
   2   6   0   37.37    4.65
   2   6   0   36.53    5.75
   2  -6   0   28.64    3.73
  -2  -6   0   34.09    5.02
  -2   6   0   38.79    5.94
  -2  -6   0   36.90    6.51
  -2   6   0   35.49    6.50
   2  -6   1   11.83    3.25
   2   6   1   15.78    3.92
   2   6   1    9.94    4.18
  -2  -6  -1    9.07    5.08
  -2   6  -1   10.04    4.18
  -2   6  -1   12.48    3.01
  -2  -6  -1   14.81    2.42
  -2  -6  -1   18.18    3.89
   2  -6   2   89.16    6.77
   2   6   2  114.98   10.65
   2   6   2  102.85    9.08
  -2  -6  -2   81.95   11.45
  -2   6  -2  102.80    7.83
  -2  -6  -2   93.03    9.94
  -2   6  -2   90.92    9.67
   2   6   3   84.39    8.61
   2  -6   3   95.72    8.51
   2   6   3   99.06    8.36
  -2  -6  -3   82.49    7.87
  -2  -6  -3   97.18   11.32
  -2   6  -3   86.93    6.13
   2   6   4   60.77    7.36
   2  -6   4   73.70    7.96
   2   6   4   60.79    6.98
   2   6   4   90.56   13.79
  -2  -6  -4   75.93   10.23
  -2  -6  -4   70.95    6.71
  -2   6  -4   65.75    5.49
   2   6   5  169.95   17.80
   2   6   5  177.37   16.43
   2  -6   5  161.32   12.23
   2   6   5  179.62   15.70
  -2   6  -5  146.61   10.88
  -2  -6  -5  151.11   16.99
  -2  -6  -5  159.92   14.24
   2   6   6   42.38   10.82
   2   6   6   36.72    7.66
   2   6   6   45.44    7.33
   2  -6   6   40.39    6.58
  -2  -6  -6   36.07    8.57
  -2   6  -6   35.07    4.37
  -2  -6  -6   32.65    6.11
   2   6   7   22.68    5.42
   2   6   7   21.52    4.61
   2  -6   7   16.75    6.22
  -2  -6  -7   14.31    7.85
  -2   6  -7   18.81    3.58
  -2  -6  -7   15.71    3.89
   2   6   8   35.10    8.72
   2  -6   8   37.28    5.86
   2  -6   8   32.49    5.89
   2   6   8   43.71    7.08
  -2   6  -8   33.80    4.58
  -2  -6  -8   49.31    9.42
  -2  -6  -8   26.15    6.29
   2  -6   9   13.83    6.48
   2   6   9    8.88    6.62
   2   6   9   11.91    4.52
  -2   6  -9   14.81    3.49
  -2  -6  -9    8.74    7.84
  -2  -6  -9    9.50    4.77
   2   6  10    3.13    5.00
   2  -6  10   10.43    5.91
  -2  -6 -10    4.22    3.45
  -2  -6 -10    1.77    7.34
  -2   6 -10   13.70    4.62
   2   6  11    4.49    5.13
   2   6  11    1.50    5.36
   2  -6  11    3.94    4.50
  -2  -6 -11    8.44    6.90
  -2  -6 -11    3.29    3.38
   2  -6  12   86.91   10.86
   2   6  12  104.50   11.92
  -2  -6 -12  115.76   19.31
   2   6  13   54.27    9.31
   2  -6  13   57.38    8.82
  -2  -6 -13   80.03   12.75
   2  -6  14   27.14    9.98
   2   6  14   42.13    6.61
   2  -6  15   72.02   10.14
   2   6  15   64.48   11.78
   2  -6  16   19.88    6.38
   2   6  16    5.45    5.51
   2  -6  17   17.34    6.66
   2   6  17    8.72    5.59
   2   6  18    9.09    5.94
   2  -6  18    7.26    6.39
   2   6  19   -6.18    5.14
   2  -6  19    2.26    8.89
   2   6  20    9.46    6.12
   2  -6  20    7.34    6.95
   2   6  21    3.47    6.06
   2   6  22   15.62    7.71
   2  -6  22   22.28    9.14
   2  -6  23   11.04   11.05
   2   6  23   11.79    9.35
   2  -6  24    7.70    8.51
   2   6  24    9.64    7.22
   2  -6  25   10.91   10.41
   2   6  25   39.21    8.90
   2   6  26    0.15    6.73
   2  -6  26   -4.85    8.34
   2  -6  27   -0.82    8.97
   2   6  27   -8.36    9.38
   2   6  27   -1.47    7.36
   2   6  28    3.76    8.20
   2  -6  28   15.58    9.94
   2  -6  29    2.65    9.53
   2   6  29    9.87   11.13
   2   6  30   13.01    9.50
   2  -6  30    9.49   10.45
   2  -6  30   17.60   10.88
   2  -6  31    9.20   14.02
   2  -6  31  -19.31   10.69
   2   6  31    4.10   12.61
   2  -6  32    0.26   11.26
   2  -6  32    7.73    6.87
   2   6  32    2.60    9.37
  -2   7  33   12.96    8.14
  -2  -7  33   -9.14   10.77
  -2   7  32   -2.96    7.94
  -2  -7  32   16.86   14.18
  -2  -7  31    1.38    9.44
  -2   7  31    0.52    7.53
  -2  -7  30   18.70   10.57
  -2   7  30    5.63    8.48
  -2   7  29   -5.87    9.10
  -2  -7  29    8.80    9.12
  -2  -7  28   14.33   10.26
  -2   7  28   15.96   10.25
  -2   7  28    7.01    9.10
  -2   7  27   -3.53    5.74
  -2  -7  27  -10.78    8.60
  -2   7  27   -1.87    6.47
  -2   7  26    5.28    6.49
  -2   7  26   -1.50    7.41
  -2  -7  26   12.72    8.17
  -2   7  25   25.18    9.04
  -2  -7  25   46.04    9.87
  -2   7  25   25.16    8.28
  -2   7  24   32.12    9.21
  -2   7  24    7.23    6.01
  -2  -7  24   19.55    8.82
  -2  -7  23    4.65    6.59
  -2   7  23   -1.51    5.19
  -2   7  23    7.99    5.62
  -2   7  22   18.46    7.09
  -2  -7  22   21.34    8.55
  -2   7  22   19.43    6.37
  -2  -7  21   32.69    7.90
  -2   7  21   12.31    6.14
  -2   7  21    9.66    7.91
  -2   7  20   49.27    7.73
  -2  -7  20   57.96   10.57
  -2   7  20   50.15    7.89
  -2   7  19   47.11    7.39
  -2  -7  19   58.40   10.05
  -2   7  19   55.63    9.36
  -2   7  18    3.67    3.83
  -2   7  18    3.26    4.91
  -2  -7  18   -9.75    7.06
   2  -7 -17    6.69    4.94
  -2  -7  17   10.96    6.36
  -2   7  17    8.99    3.92
  -2   7  17   14.00    4.18
  -2   7  17    8.03    8.25
   2  -7 -16   63.94    8.65
  -2   7  16   72.46    7.52
  -2   7  16   52.28   12.91
  -2  -7  16   71.77   10.83
  -2   7  16   76.60    7.38
   2  -7 -15   10.24    4.49
  -2   7  15    7.12    3.60
  -2  -7  15    5.10    5.40
  -2   7  15    7.50    7.10
  -2   7  15   11.82    4.40
   2  -7 -14   31.04    5.50
  -2   7  14   36.21    6.59
  -2   7  14   40.39    9.10
  -2   7  14   35.01    4.83
  -2  -7  14   53.27    9.79
   2  -7 -13   34.42    5.21
   2   7 -13   32.84    8.21
  -2   7  13   26.74    4.17
  -2  -7  13   21.40    6.52
  -2   7  13   31.33    7.20
  -2   7  13   28.69    5.62
   2   7 -12   -0.61    5.49
   2  -7 -12   -0.65    3.02
  -2   7  12    3.61    4.72
  -2   7  12    0.08    2.76
  -2   7  12    7.24    3.36
  -2  -7  12    1.92    4.26
   2   7 -11   74.88   10.56
   2  -7 -11   64.51    6.16
  -2   7  11   63.54    6.56
  -2   7  11   66.27    7.86
  -2   7  11   69.87    5.53
  -2  -7  11   65.46    8.40
   2  -7 -10   16.87    2.96
   2  -7 -10    4.90    2.72
   2   7 -10    4.22    5.99
  -2  -7  10    8.49    4.83
  -2   7  10    9.70    3.24
  -2   7  10    8.92    4.28
   2  -7  -9   40.39    6.79
   2   7  -9   47.31    7.44
   2   7  -9   26.55    5.00
   2  -7  -9   30.41    4.15
   2  -7  -9   26.01    3.50
  -2  -7   9   41.33    6.44
  -2   7   9   25.99    5.04
  -2   7   9   36.64    3.76
  -2   7   9   32.63    4.01
   2   7  -8  215.32   17.08
   2  -7  -8  223.06   19.18
   2  -7  -8  196.69   13.76
   2   7  -8  231.92   20.28
   2  -7  -8  180.86   19.41
   2  -7  -8  213.81   14.03
  -2   7   8  213.01   13.85
  -2  -7   8  233.82   18.63
  -2   7   8  224.06   14.03
  -2   7   8  221.95   15.61
   2   7  -7   11.67    4.33
   2  -7  -7   15.20    3.05
   2   7  -7   22.66    6.20
   2  -7  -7   21.76    3.66
   2  -7  -7   19.41    8.29
   2  -7  -7   20.13    5.62
  -2  -7   7   20.74    5.34
  -2   7   7   20.46    4.46
  -2   7   7   21.17    3.00
  -2   7   7   23.30    3.37
   2   7  -6  292.83   21.31
   2  -7  -6  251.21   16.46
   2   7  -6  276.23   22.60
   2  -7  -6  229.82   23.02
   2  -7  -6  255.54   19.65
   2  -7  -6  238.65   15.75
  -2   7   6  259.48   16.05
  -2   7   6  243.27   16.86
  -2  -7   6  285.46   21.82
   2   7  -5  201.30   14.68
   2  -7  -5  193.46   11.68
   2   7  -5  181.51   16.15
   2  -7  -5  195.57   15.91
   2  -7  -5  181.57   11.85
  -2  -7   5  146.47   15.26
  -2  -7   5  154.61   14.00
  -2   7   5  202.97   11.72
   2  -7  -4   23.63    4.02
   2  -7  -4   31.97    5.59
   2   7  -4   27.13    5.55
   2   7  -4   44.24    5.89
   2  -7  -4   19.32    3.26
  -2   7   4   29.18    3.41
  -2  -7   4   27.19    7.20
  -2   7   4   21.34    3.33
  -2  -7   4   34.14    5.12
   2  -7  -3  198.16   13.66
   2   7  -3  209.30   19.47
   2  -7  -3  183.74   13.24
   2   7  -3  198.27   14.44
  -2  -7   3  178.42   18.50
  -2  -7   3  195.22   15.79
  -2   7   3  195.80   12.12
   2   7  -2  224.85   16.43
   2  -7  -2  224.52   16.49
   2  -7  -2  226.79   15.39
   2   7  -2  242.65   21.78
  -2   7   2  234.86   14.37
  -2  -7   2  224.83   21.33
  -2   7   2  267.19   21.46
  -2  -7   2  214.25   17.46
   2  -7  -1    9.72    3.17
   2  -7  -1   11.64    2.69
   2   7  -1    4.33    4.21
   2   7  -1    4.54    3.17
  -2  -7   1    7.34    3.64
  -2   7   1   -0.63    3.06
  -2   7   1    4.41    2.49
  -2   7   1    7.36    6.80
  -2  -7   1   13.35    4.37
   2  -7   0  196.60   14.18
   2   7   0  245.30   17.47
   2   7   0  223.41   17.91
  -2   7   0  223.31   17.46
  -2  -7   0  234.32   17.71
  -2   7   0  231.72   23.15
  -2  -7   0  240.18   18.97
  -2   7   0  235.32   15.16
   2  -7   1  212.21   14.17
   2   7   1  188.82   15.53
   2   7   1  185.13   14.47
  -2   7  -1  227.34   14.65
  -2  -7  -1  160.45   15.55
  -2   7  -1  217.62   16.20
  -2  -7  -1  191.21   14.47
   2   7   2   24.87    4.53
   2   7   2   35.68    5.05
   2  -7   2   27.46    4.42
  -2  -7  -2   32.80    4.59
  -2  -7  -2   19.84    6.47
  -2   7  -2   20.75    2.93
  -2   7  -2   27.69    5.57
   2   7   3  220.74   16.28
   2   7   3  232.72   16.85
   2  -7   3  181.23   12.85
  -2  -7  -3  207.52   19.22
  -2  -7  -3  174.11   14.34
  -2   7  -3  206.27   14.83
  -2   7  -3  197.38   14.32
   2   7   4  292.68   27.58
   2  -7   4  301.03   22.63
   2   7   4  223.29   18.26
   2   7   4  270.58   23.30
  -2  -7  -4  223.19   22.38
  -2   7  -4  272.91   18.30
  -2  -7  -4  266.31   21.81
   2   7   5   21.77    4.71
   2   7   5   26.43    7.75
   2   7   5   26.92    4.70
   2  -7   5   18.46    4.19
  -2  -7  -5   21.39    7.52
  -2  -7  -5   25.28    4.32
  -2   7  -5   14.66    4.67
   2   7   6  209.56   17.04
   2  -7   6  214.19   16.61
   2   7   6  220.55   25.85
   2   7   6  196.31   15.65
  -2  -7  -6  216.99   20.66
  -2  -7  -6  199.13   15.61
  -2   7  -6  198.60   14.72
   2   7   7   41.48    7.34
   2   7   7   25.81    7.63
   2   7   7   33.75    5.40
   2  -7   7   44.51    5.65
  -2  -7  -7   32.73    5.99
  -2   7  -7   30.13    5.72
  -2  -7  -7   48.77   11.68
   2   7   8    6.87    4.05
   2  -7   8    9.41    4.42
   2   7   8   13.54    4.99
  -2   7  -8    9.07    4.36
  -2  -7  -8   22.63    9.78
  -2  -7  -8   13.70    3.51
   2   7   9   60.57    8.60
   2   7   9   68.59    8.28
   2  -7   9   68.92    7.39
  -2  -7  -9   55.36    6.60
  -2  -7  -9   60.44   14.39
  -2   7  -9   49.40    5.86
   2  -7  10    3.18    3.89
   2   7  10   -0.81    6.20
   2   7  10   -1.32    3.68
  -2  -7 -10   -2.51    4.14
  -2  -7 -10    7.65    6.89
   2  -7  11   25.25    6.25
   2   7  11   30.78    5.22
   2   7  11   17.48    1.29
  -2  -7 -11   18.12   11.99
   2  -7  12   36.03    7.95
   2   7  12   39.53    6.02
  -2  -7 -12   29.50   10.47
   2  -7  13    3.15    7.70
   2   7  13    8.86    4.27
   2  -7  13    9.49    5.13
   2   7  13    2.89    1.98
  -2  -7 -13   21.34    8.09
   2   7  14   67.04    8.52
   2  -7  14   73.81   10.27
   2  -7  14   69.07   10.31
   2   7  14   68.67    5.73
  -2  -7 -14   91.25   19.38
   2   7  15   17.72    5.41
   2   7  15    8.35    3.27
   2  -7  15    6.10    8.50
   2   7  16    0.20    2.62
   2  -7  16   -1.16    5.43
   2   7  16   -0.89    4.44
   2  -7  17   47.49    9.97
   2   7  17   53.99    8.86
   2   7  17   48.06    5.64
   2   7  18   45.31    9.07
   2  -7  18   57.90   10.43
   2  -7  19   18.53    7.60
   2   7  19   14.06    5.00
   2   7  19   16.42    6.48
   2   7  20   40.43    7.98
   2  -7  20   23.12    9.91
   2   7  21   -1.29    5.78
   2   7  21    2.94    4.65
   2  -7  21    5.21    7.29
   2   7  22    1.79    7.29
   2  -7  22   14.26    8.98
   2   7  22   16.83    6.34
   2   7  23   36.16    8.74
   2  -7  23   28.24   11.81
   2   7  23   30.14    9.38
   2  -7  23   41.53   11.18
   2   7  24   -3.55    6.01
   2   7  24    1.58    7.89
   2  -7  24    5.55    7.08
   2  -7  24   -3.49    7.87
   2   7  25    6.05    6.96
   2  -7  25   -4.63    8.00
   2  -7  25   -8.83    8.05
   2  -7  26   17.55   12.64
   2   7  26   10.10    7.99
   2  -7  26    7.37    9.51
   2   7  27    3.59    7.78
   2  -7  27  -10.54    8.58
   2  -7  27    5.46    5.40
   2  -7  28    2.36    9.67
   2  -7  28    5.62    5.85
   2   7  28   10.27    8.20
   2  -7  29    9.95   11.15
   2   7  29   24.62    9.62
   2   7  30   11.35    9.37
   2  -7  30    9.17   10.67
   2  -7  31   13.17   11.90
   2   7  31   13.05   10.13
  -2   8  33    8.81    9.00
  -2  -8  33    3.88   11.61
  -2   8  32   13.34    8.93
  -2  -8  32   -3.46   10.40
  -2  -8  31   12.70   15.72
  -2   8  31   21.50    9.37
  -2   8  30   12.51   11.60
  -2  -8  30   32.80   11.70
  -2  -8  29   16.01    8.93
  -2   8  29   -2.83   10.03
  -2   8  28   -5.09   10.51
  -2  -8  28   30.72    9.78
  -2   8  27   10.02    7.32
  -2  -8  27   19.55    9.57
  -2  -8  26   -1.87    8.26
  -2   8  26    6.07    6.85
  -2   8  26   13.15    8.30
  -2  -8  25    6.64    7.64
  -2   8  25    2.48    7.97
  -2   8  25    3.14    6.35
  -2   8  24   -1.87    5.39
  -2   8  24   -3.30    5.63
  -2  -8  24    2.39    9.89
  -2   8  23    3.16    5.06
  -2  -8  23    3.08    6.96
  -2   8  23    7.15    7.19
  -2   8  22    2.59    4.78
  -2   8  22    3.66    4.95
  -2  -8  22   -0.81    6.88
  -2  -8  21    9.21    7.26
  -2   8  21    8.51    6.90
  -2   8  21    8.55    5.14
  -2   8  20    6.15    4.62
  -2  -8  20    5.56    6.66
  -2   8  20    9.96    4.64
  -2   8  19   13.48    6.67
  -2  -8  19   23.26    7.88
  -2   8  18   16.74    4.53
  -2   8  18   12.98    6.49
  -2  -8  18   27.00    9.74
   2  -8 -17    3.76    4.54
  -2   8  17    4.04    5.07
  -2   8  17   -1.21    7.11
  -2  -8  17    6.39    5.34
  -2   8  17    1.11    3.44
   2  -8 -16   10.95    3.50
   2   8 -16    2.69    7.94
  -2  -8  16   11.76    5.92
  -2   8  16    7.82    5.20
  -2   8  16    6.98    5.47
  -2   8  16    9.33    3.61
   2  -8 -15   16.17    5.02
   2   8 -15   12.27   10.86
  -2   8  15   17.25    4.29
  -2   8  15   23.33    4.64
  -2  -8  15   14.97    9.15
   2  -8 -14   11.08    3.97
   2   8 -14    2.62    6.99
  -2   8  14   10.86    4.44
  -2   8  14    0.85    6.02
  -2  -8  14   10.95    5.17
  -2   8  14    8.22    3.58
   2   8 -13   47.56   10.21
  -2  -8  13   49.76    8.60
  -2   8  13   45.67    8.22
  -2   8  13   46.78    4.79
  -2   8  13   67.19    7.02
   2  -8 -12  136.42   11.32
   2   8 -12  144.90   17.03
  -2  -8  12  135.30   14.24
  -2   8  12  167.03   12.68
  -2   8  12  136.41    9.47
  -2   8  12  139.47   14.60
   2   8 -11   68.35   10.17
   2  -8 -11   67.19    6.72
  -2  -8  11   52.32    8.79
  -2   8  11   83.39    7.52
  -2   8  11   62.67    8.37
  -2   8  11   71.15    5.52
   2  -8 -10   17.83    6.75
   2  -8 -10   13.49    3.42
   2   8 -10   23.41    6.49
  -2  -8  10   18.54    5.53
  -2   8  10   19.36    3.61
  -2   8  10   16.82    2.79
  -2   8  10   12.99    4.21
   2  -8  -9   62.22    5.87
   2  -8  -9   67.52    9.15
   2  -8  -9   70.47    6.17
   2   8  -9   77.11   10.43
  -2   8   9   64.45    6.52
  -2  -8   9   73.74    8.68
  -2   8   9   80.23    6.32
  -2   8   9   73.72    6.27
   2  -8  -8   50.09    4.80
   2  -8  -8   48.04    4.90
   2   8  -8   66.12    8.35
  -2   8   8   44.36    4.46
  -2  -8   8   37.64    6.81
  -2   8   8   42.38    5.99
   2  -8  -7   12.13    4.76
   2  -8  -7   15.04    3.39
   2   8  -7    0.15    5.82
   2  -8  -7    8.09    3.18
   2   8  -7   11.13    3.62
   2  -8  -7   10.25    2.63
  -2   8   7   12.18    2.72
  -2  -8   7   11.32    4.47
  -2   8   7    6.74    2.62
   2   8  -6   77.81    7.47
   2  -8  -6   63.95    8.29
   2  -8  -6   77.89    5.86
   2  -8  -6   65.01    5.43
   2   8  -6   68.54    9.38
  -2   8   6   83.85    6.09
  -2  -8   6   77.24    8.73
  -2   8   6   81.83    6.76
   2  -8  -5   60.17    5.14
   2  -8  -5   58.37    5.38
   2   8  -5   45.91    7.68
   2   8  -5   38.43    6.02
   2  -8  -5   60.22    6.77
  -2  -8   5   57.64    7.75
  -2   8   5   63.92    5.34
  -2   8   5   55.64    4.83
  -2  -8   5   62.94    7.43
   2   8  -4    4.48    3.19
   2  -8  -4    0.91    4.63
   2  -8  -4    6.00    2.77
   2   8  -4    2.88    4.34
   2  -8  -4   11.87    2.96
  -2  -8   4    8.48    4.62
  -2   8   4   11.44    2.92
  -2  -8   4    6.84    4.44
  -2   8   4    6.30    2.23
   2  -8  -3   65.67    6.61
   2  -8  -3   63.69    5.85
   2   8  -3   59.04    5.96
   2  -8  -3   59.08    5.80
   2   8  -3   66.41    9.63
  -2  -8   3   63.99    7.46
  -2  -8   3   66.36    9.93
  -2   8   3   75.36    9.02
  -2   8   3   54.35    4.96
  -2   8   3   52.29    5.06
   2   8  -2   69.72    7.54
   2  -8  -2   67.30    6.18
   2  -8  -2   57.24    5.92
   2   8  -2   55.24    6.05
  -2   8   2   59.59    8.60
  -2   8   2   59.56    5.45
  -2  -8   2   60.14    7.61
  -2   8   2   53.47    5.34
  -2  -8   2   55.86    7.13
   2   8  -1   95.69    9.39
   2   8  -1   85.35    8.01
   2  -8  -1  101.68    8.02
   2  -8  -1   98.75    7.75
  -2  -8   1   86.01    9.99
  -2   8   1  115.57   12.34
  -2   8   1   96.86    6.95
  -2   8   1   94.41    7.64
  -2  -8   1  106.96    9.80
   2  -8   0   74.16    6.46
   2   8   0   65.92    7.32
   2   8   0   47.74    5.79
  -2  -8   0   69.06    7.10
  -2   8   0   62.78    5.42
  -2   8   0   55.71    8.67
  -2   8   0   58.66    6.42
  -2  -8   0   63.31    8.04
   2   8   1   49.47    6.88
   2  -8   1   66.69    6.29
   2   8   1   47.92    5.80
  -2   8  -1   58.15    5.70
  -2   8  -1   61.19    6.83
  -2   8  -1   53.75    4.37
  -2  -8  -1   49.41    7.91
  -2  -8  -1   60.42    6.45
   2   8   2    7.30    3.32
   2   8   2    8.34    4.12
   2  -8   2    4.98    3.52
  -2  -8  -2    6.86    3.45
  -2  -8  -2    8.16    4.77
  -2   8  -2    6.82    4.33
  -2  -8  -2    4.77    2.09
  -2   8  -2    2.42    2.92
   2   8   3   63.70    7.01
   2   8   3   51.99    7.75
   2  -8   3   56.77    5.55
  -2  -8  -3   57.81    6.07
  -2   8  -3   49.47    5.94
  -2  -8  -3   71.34    9.05
  -2   8  -3   56.53    7.71
   2   8   4   85.15    8.19
   2   8   4   98.11   12.68
   2   8   4   71.76    7.65
   2  -8   4   89.78    8.74
  -2   8  -4   74.66    7.18
  -2  -8  -4   72.94    7.47
  -2   8  -4   91.92    8.34
  -2  -8  -4   57.43    9.94
   2   8   5   10.86    4.13
   2   8   5    6.84    5.63
   2   8   5   10.72    7.29
   2  -8   5   11.65    3.84
  -2   8  -5   15.44    5.94
  -2  -8  -5   14.93    3.69
  -2  -8  -5   15.02    8.14
  -2   8  -5   13.24    3.87
   2   8   6   49.80   10.19
   2  -8   6   52.19    6.05
   2   8   6   54.53    6.18
   2   8   6   53.79    6.36
  -2  -8  -6   47.84    5.97
  -2   8  -6   39.65    4.93
  -2  -8  -6   46.83    9.64
   2   8   7   86.17   10.28
   2  -8   7   83.42   10.22
   2   8   7   70.48   11.43
   2   8   7   61.19    7.82
  -2   8  -7   68.26    6.39
  -2  -8  -7   81.82   14.91
  -2  -8  -7   65.31    7.22
   2  -8   8   22.67    6.44
   2   8   8   15.23    6.67
   2   8   8   10.14    5.87
  -2  -8  -8   30.63   10.01
  -2   8  -8   13.97    3.82
  -2  -8  -8    5.75    5.11
   2   8   9   67.82   11.17
   2  -8   9   57.96   10.22
   2   8   9   79.24    9.55
  -2   8  -9   55.87    6.63
  -2  -8  -9   93.64   15.95
  -2  -8  -9   58.88    8.86
   2  -8  10  140.01   14.29
   2   8  10  142.63   12.69
  -2  -8 -10  163.05   18.83
   2   8  11   55.49    9.26
   2  -8  11   48.70    8.31
  -2  -8 -11   76.45   15.94
   2   8  12    4.77    4.37
   2  -8  12    4.57    5.31
  -2  -8 -12   15.80   10.14
   2  -8  13   15.87    6.21
   2   8  13   15.70    5.31
  -2  -8 -13   31.67   12.39
   2  -8  14    5.95    5.82
   2   8  14   12.69    1.48
   2   8  14    2.92    6.92
  -2  -8 -14   11.24   12.10
   2   8  15    7.97    4.92
   2  -8  15   13.91    6.10
  -2  -8 -15   -2.86    9.13
   2   8  16   12.16    2.78
   2  -8  16   13.99    6.84
   2   8  16   28.73    5.93
   2  -8  17   13.70    6.92
   2   8  17    8.57    5.96
   2  -8  18    1.35    6.27
   2   8  18    1.66    2.74
   2   8  18    7.93    7.44
   2  -8  19    6.39   10.47
   2   8  19   17.15    3.98
   2   8  19   18.57    9.01
   2   8  20   12.55    4.35
   2  -8  20   12.51   10.63
   2   8  20   14.79    8.35
   2  -8  21   -1.73    9.76
   2   8  21    2.86    4.08
   2   8  21    5.57    7.70
   2  -8  22    9.12   10.09
   2   8  22   -3.82    8.23
   2   8  22    1.73    4.58
   2  -8  23    3.97    7.51
   2   8  23    4.43    8.93
   2   8  24    9.22    7.16
   2  -8  24    2.04    8.63
   2  -8  25    7.58    9.07
   2   8  25    8.65    7.76
   2   8  26    1.39    9.90
   2  -8  26    8.36    8.99
   2   8  27   12.37    7.58
   2  -8  27   -6.58    9.64
   2   8  28    3.82   11.20
   2  -8  28   20.27    9.79
   2   8  29    6.63    7.66
   2  -8  29   -8.62    8.79
   2   8  30   16.57   11.47
   2  -8  30   -8.33    9.92
   2   8  31   -8.00    9.28
   2  -8  31   -3.52    9.94
  -2   9  32   20.46   12.19
  -2  -9  32    8.21   11.13
  -2  -9  31  -16.88    9.59
  -2   9  31   10.73    7.34
  -2   9  30   15.44    8.56
  -2  -9  30   28.59   15.13
  -2  -9  29   24.38   12.90
  -2   9  29   -2.53   10.25
  -2   9  28    0.03    6.80
  -2  -9  28   23.31   11.76
  -2   9  27   14.29    6.94
  -2  -9  27   -2.53    8.77
  -2   9  26    5.32   10.00
  -2  -9  26   31.85    9.63
  -2  -9  25   -9.48    8.17
  -2   9  25   15.18    6.02
  -2  -9  24    3.70    8.27
  -2   9  24   10.26    7.78
  -2   9  24    3.47    5.53
  -2   9  23   49.81    8.48
  -2   9  23   41.02    7.92
  -2  -9  23   32.71   14.98
  -2   9  22   28.88    9.34
  -2  -9  22   41.67    9.62
  -2   9  22   24.40    6.21
  -2  -9  21   24.53   11.60
  -2   9  21   17.46    5.18
  -2   9  21   17.36    5.86
   2   9 -20   28.90   10.91
  -2   9  20   28.21    5.01
  -2   9  20   19.15    7.83
  -2  -9  20    7.44    8.94
   2   9 -19   20.50    9.27
  -2   9  19   18.67    6.48
  -2  -9  19   13.17    8.06
   2   9 -18   16.88   11.04
  -2   9  18    1.73    4.37
  -2  -9  18   12.66    9.29
  -2   9  18   10.34    5.72
   2   9 -17    3.85    8.55
  -2   9  17    7.87    5.64
  -2  -9  17    8.46    8.55
  -2   9  17   13.02    3.59
   2  -9 -16    1.32    3.50
   2   9 -16    6.37    9.72
  -2  -9  16   16.64    8.08
  -2   9  16    5.02    6.66
  -2   9  16    7.30    3.56
  -2   9  16    8.94    3.76
   2   9 -15   15.59    7.33
   2  -9 -15    6.84    4.38
  -2   9  15   15.82    4.87
  -2  -9  15   -2.48    6.05
  -2   9  15    9.56    6.79
   2  -9 -14    4.45    3.98
   2   9 -14   -2.14    7.15
  -2  -9  14    3.51    5.35
  -2   9  14   11.73    5.69
  -2   9  14    8.32    2.63
  -2   9  14   14.46    4.64
   2   9 -13   13.89    6.37
   2  -9 -13    2.50    3.68
  -2   9  13    7.40    3.87
  -2   9  13    2.65    5.03
  -2  -9  13    6.37    5.25
   2   9 -12   27.25    7.96
   2  -9 -12   35.62    4.91
  -2   9  12   23.28    5.72
  -2   9  12   32.83    4.74
  -2   9  12   27.29    3.42
  -2  -9  12   26.54    7.22
   2  -9 -11   23.36    4.51
   2  -9 -11   27.34    7.70
   2   9 -11   28.71    7.68
   2  -9 -11   23.42    3.08
  -2   9  11   23.77    5.04
  -2  -9  11   22.36    6.39
  -2   9  11   26.75    3.58
  -2   9  11   30.34    4.32
   2  -9 -10   71.91   10.62
   2   9 -10   62.69   13.18
   2  -9 -10   59.17    4.73
   2  -9 -10   61.13    6.08
  -2   9  10   60.80    6.59
  -2  -9  10   78.94    8.68
  -2   9  10   58.91    5.83
   2  -9  -9   56.46    4.55
   2  -9  -9   75.08    9.99
   2   9  -9   50.71    9.53
  -2   9   9   50.54    5.72
  -2  -9   9   56.51    7.80
  -2   9   9   70.13    5.75
   2  -9  -8    2.67    4.72
   2  -9  -8    4.53    2.84
   2   9  -8    9.73    7.24
   2  -9  -8    2.78    2.28
  -2   9   8    1.63    3.49
  -2  -9   8    0.40    5.96
  -2   9   8    4.91    2.63
   2  -9  -7   39.43    3.95
   2   9  -7   40.35    7.71
   2  -9  -7   44.44    7.53
   2  -9  -7   33.94    4.34
  -2   9   7   42.78    4.28
  -2  -9   7   50.76    6.87
  -2   9   7   41.85    4.47
   2  -9  -6    5.99    5.27
   2  -9  -6    4.58    2.62
   2   9  -6   13.30    6.67
   2  -9  -6    5.15    2.93
  -2  -9   6   12.76    5.98
  -2   9   6    2.77    2.51
   2  -9  -5    0.80    2.53
   2  -9  -5    2.50    2.78
   2   9  -5    3.53    4.38
   2   9  -5    1.96    3.19
   2  -9  -5    3.16    3.70
  -2  -9   5    3.57    4.02
  -2   9   5    0.41    2.55
  -2  -9   5    2.50    4.30
  -2   9   5    2.25    2.82
   2  -9  -4   85.45    6.91
   2  -9  -4   74.55    6.72
   2   9  -4   87.70    9.52
   2  -9  -4   88.39   10.08
   2   9  -4  103.28   11.93
  -2  -9   4   94.40   11.52
  -2   9   4   81.75    6.30
  -2  -9   4   62.56    8.64
  -2   9   4   91.98    7.09
   2  -9  -3   22.03    5.00
   2  -9  -3   31.62    4.11
   2   9  -3   19.41    5.71
   2   9  -3   20.15    7.43
   2  -9  -3   30.52    4.47
  -2   9   3   24.72    3.84
  -2  -9   3   31.69    7.02
  -2   9   3   30.09    7.61
  -2   9   3   22.71    3.37
  -2  -9   3   28.42    7.49
   2   9  -2   32.31    4.66
   2   9  -2   35.96    6.03
   2  -9  -2   28.88    3.50
   2  -9  -2   31.39    5.16
  -2   9   2   29.85    3.99
  -2  -9   2   34.39    7.31
  -2   9   2   28.18    4.44
  -2   9   2   26.19    6.96
  -2  -9   2   48.45    8.49
   2   9  -1  140.32   13.10
   2   9  -1  132.86   13.02
   2  -9  -1  171.84   12.61
   2  -9  -1  147.71   12.74
  -2   9   1  146.87   11.72
  -2  -9   1  166.37   16.32
  -2  -9   1  144.95   13.68
  -2   9   1  152.89   16.10
  -2   9   1  148.35   10.39
   2   9   0   26.50    5.71
   2  -9   0   37.24    5.09
   2   9   0   29.34    7.34
  -2   9   0   23.31    3.96
  -2   9   0   29.93    5.09
  -2  -9   0   38.53    7.90
  -2   9   0   17.16    6.86
  -2  -9   0   37.08    6.98
   2   9   1   24.09    5.39
   2   9   1   22.44    5.65
   2  -9   1   29.74    5.05
  -2  -9  -1   24.98    6.16
  -2  -9  -1   30.22    6.34
  -2   9  -1   21.77    5.18
  -2   9  -1   29.21    4.29
   2  -9   2   88.03    8.30
   2   9   2   85.30    8.95
   2   9   2   83.01    7.95
  -2  -9  -2   80.47    8.17
  -2  -9  -2   82.92    9.80
  -2   9  -2   75.49    7.64
  -2   9  -2   96.14    9.40
   2   9   3    8.41    5.26
   2  -9   3    2.40    4.03
   2   9   3    6.98    4.25
  -2   9  -3    3.79    4.59
  -2  -9  -3   -2.97    6.72
  -2  -9  -3   -1.04    3.24
  -2   9  -3    1.25    2.24
   2   9   4    6.66    7.04
   2  -9   4   16.17    4.43
   2   9   4    5.96    4.95
   2   9   4   -1.60    4.20
  -2   9  -4    7.40    5.42
  -2  -9  -4    8.39    4.76
  -2  -9  -4    8.51    5.96
  -2   9  -4    4.49    2.77
   2   9   5   55.02   10.48
   2  -9   5   52.98    7.22
   2   9   5   46.01    8.08
   2   9   5   45.12    8.45
  -2  -9  -5   49.70   11.54
  -2   9  -5   46.55    9.15
  -2   9  -5   47.30    5.84
  -2  -9  -5   46.79    7.53
   2  -9   6    4.47    4.90
   2   9   6    8.62    3.91
   2   9   6    3.43    6.36
   2   9   6    2.23    4.03
  -2   9  -6    4.03    6.16
  -2   9  -6   -0.01    2.91
  -2  -9  -6    5.63    5.98
  -2  -9  -6    4.55    3.64
   2  -9   7   53.64    7.30
   2   9   7   43.60    7.12
   2   9   7   77.00   11.83
   2   9   7   58.76    7.25
  -2  -9  -7   64.48   11.27
  -2  -9  -7   57.40    8.29
  -2   9  -7   65.87    7.99
  -2   9  -7   50.82    7.21
   2   9   8   78.20    8.20
   2  -9   8   66.54    9.88
  -2   9  -8   56.66    8.13
  -2  -9  -8   73.78   11.85
   2  -9   9   25.94    7.54
   2   9   9   25.63    5.09
  -2  -9  -9   25.69    8.51
   2   9  10   48.48    7.93
   2  -9  10   31.19    6.70
  -2  -9 -10   35.85    9.46
   2  -9  11    2.14    6.06
   2   9  11   -2.47    3.77
  -2  -9 -11   17.59    9.50
   2   9  12    6.91    4.62
   2  -9  12    9.91    5.03
  -2  -9 -12    7.94    7.90
   2  -9  13    5.64    5.99
   2   9  13    4.70    4.97
  -2  -9 -13   34.49    8.37
   2  -9  14    1.87    7.91
   2   9  14    8.82    4.76
  -2  -9 -14   13.04    8.56
   2   9  15   12.91    7.07
   2  -9  15    7.37    6.30
  -2  -9 -15    4.56   12.61
   2   9  16    6.71    4.90
   2  -9  16    1.21    6.25
  -2  -9 -16    4.18    5.56
   2  -9  17   24.42    9.75
   2   9  17    4.47    7.84
   2  -9  18   32.79    9.16
   2   9  18   24.57    7.56
   2   9  19   16.43    6.76
   2   9  19   17.91    2.99
   2  -9  19   42.21    8.97
   2  -9  20    4.78    9.40
   2   9  20   33.56    7.89
   2   9  21   29.98    9.11
   2  -9  21   41.17   10.79
   2   9  22   17.27    7.00
   2  -9  22    1.63    8.56
   2   9  23    6.28    6.45
   2  -9  23    0.23    8.34
   2  -9  24    0.63    9.24
   2   9  24   15.00    7.47
   2   9  25    1.53   10.93
   2  -9  25   24.89   10.61
   2   9  26    1.53    7.73
   2  -9  26   23.32   10.22
   2   9  27    2.87    7.45
   2  -9  27   -1.56    8.82
   2   9  28  -11.16   10.77
   2  -9  28    7.30   13.53
   2  -9  29    6.38   12.09
   2   9  29   22.13    9.66
   2  -9  30   14.87   11.47
   2   9  30    9.16    9.29
   2  10 -31    0.89   13.98
  -2  10  31    5.79   10.61
  -2 -10  31   10.86   10.65
   2  10 -30   21.39   13.46
  -2 -10  30   11.75   10.70
  -2  10  30    0.40    7.88
   2  10 -29   -9.84   11.74
  -2  10  29   -3.49    9.11
  -2 -10  29    6.10    9.15
   2  10 -28   -5.26   12.61
  -2  10  28    4.89   10.02
  -2 -10  28   26.22    9.85
   2  10 -27   -9.13   10.66
  -2 -10  27    4.38    8.42
  -2  10  27   -0.97    5.93
   2  10 -26    4.64   11.01
  -2 -10  26    3.63    8.50
  -2  10  26    3.67    8.12
   2  10 -25    4.49   12.95
  -2  10  25    4.11    5.55
  -2 -10  25  -14.95   10.31
   2  10 -24  -13.90   10.48
  -2 -10  24    2.37    7.48
  -2  10  24    7.73    6.84
   2  10 -23   -6.19    9.65
  -2  10  23    2.78    5.16
  -2 -10  23    4.70    7.18
   2  10 -22    6.94   10.56
  -2 -10  22   15.57    8.47
  -2  10  22    4.98    7.47
   2  10 -21   17.78    9.51
  -2  10  21    4.83    3.63
  -2  10  21    9.23    6.33
  -2 -10  21    4.22    7.87
   2  10 -20   36.21   10.33
  -2 -10  20   20.44    8.01
  -2  10  20    8.59    6.55
  -2  10  20   11.14    4.34
   2  10 -19   -4.75    7.95
  -2 -10  19   10.04    6.46
  -2  10  19    1.52    5.38
  -2  10  19    0.00    3.61
   2  10 -18    2.00   11.19
  -2  10  18    2.87    2.81
  -2 -10  18   16.35    8.92
  -2  10  18   13.77    5.45
   2  10 -17    9.56   11.15
  -2  10  17   10.88    5.16
  -2 -10  17    6.47    8.21
  -2  10  17    3.53    2.98
   2 -10 -16    1.87    4.37
   2  10 -16   15.84    9.77
  -2 -10  16    1.67    7.57
  -2  10  16   -2.19    4.44
  -2  10  16    1.06    6.18
  -2  10  16    1.54    2.30
   2  10 -15   -6.99    7.59
   2 -10 -15    0.59    4.23
  -2  10  15    1.36    2.15
  -2  10  15    2.87    4.14
  -2  10  15    0.24    5.65
  -2 -10  15    5.49    5.24
   2  10 -14   29.37    8.30
   2 -10 -14   13.89    4.61
  -2  10  14   11.31    4.59
  -2  10  14   15.93    5.74
  -2 -10  14   13.34    6.58
  -2  10  14   12.81    2.92
   2  10 -13   18.45    8.25
   2 -10 -13   19.76    4.88
  -2  10  13   15.78    5.82
  -2 -10  13   13.14    7.08
  -2  10  13   28.95    4.92
   2  10 -12   40.37   12.35
   2 -10 -12   27.76    6.82
   2 -10 -12   30.14    5.21
  -2 -10  12   23.11    9.71
  -2  10  12   35.50    6.48
  -2  10  12   37.03    5.16
   2  10 -11   75.34   11.32
   2 -10 -11   74.07   10.55
   2 -10 -11   52.55    4.58
   2 -10 -11   56.20    6.46
  -2  10  11   54.98    7.22
  -2  10  11   69.01    6.65
  -2 -10  11   66.89    9.55
   2 -10 -10   56.70    6.33
   2 -10 -10   60.04    4.83
   2  10 -10   65.67   14.33
  -2  10  10   67.97    6.22
  -2 -10  10   61.09   12.33
  -2  10  10   55.23    6.80
   2 -10  -9   27.65    3.97
   2  10  -9   22.99    6.88
   2 -10  -9   34.37    7.02
   2 -10  -9   16.36    2.91
  -2 -10   9   19.64    5.89
  -2  10   9   17.50    3.84
  -2  10   9   22.75    4.01
   2  10  -8   36.54    9.91
   2 -10  -8   34.16    4.26
   2 -10  -8   25.33    7.02
   2 -10  -8   25.63    3.21
  -2 -10   8   36.97    6.83
  -2  10   8   28.30    4.61
  -2  10   8   35.49    5.03
   2  10  -7   18.40    6.44
   2 -10  -7   19.58    3.91
   2 -10  -7   25.19    6.03
   2 -10  -7   17.95    3.07
  -2  10   7   27.10    3.68
  -2  10   7   17.77    3.48
  -2 -10   7   21.05    5.95
   2 -10  -6    1.39    2.55
   2 -10  -6    6.31    4.34
   2  10  -6   14.01    5.11
   2 -10  -6    3.21    2.69
  -2  10   6    1.39    2.59
  -2 -10   6   11.85    4.36
  -2  10   6    3.24    2.83
   2 -10  -5    2.36    4.07
   2 -10  -5    0.09    2.61
   2  10  -5    4.86    5.95
   2 -10  -5    1.49    3.51
  -2 -10   5    1.28    4.28
  -2  10   5   -1.45    2.25
  -2  10   5   -0.88    2.62
   2 -10  -4    6.78    3.55
   2 -10  -4   11.03    4.87
   2 -10  -4    9.00    3.71
   2  10  -4    2.44    4.83
  -2  10   4   10.33    3.46
  -2  10   4    8.85    3.59
  -2 -10   4   26.80    4.97
   2 -10  -3   22.87    5.45
   2  10  -3   21.67    7.84
   2 -10  -3   39.11    5.68
   2 -10  -3   26.75    4.36
  -2 -10   3   26.80    7.75
  -2  10   3   22.62    3.63
  -2  10   3   21.54    4.34
  -2  10   3   26.01    7.64
   2 -10  -2  106.00    9.61
   2  10  -2  112.91   13.97
   2 -10  -2  113.02    9.99
  -2  10   2  100.44    7.93
  -2  10   2  106.52   13.25
  -2 -10   2  129.00   11.75
  -2  10   2  108.44    9.32
   2  10  -1  152.59   13.17
   2  10  -1  215.09   19.32
   2 -10  -1  173.75   13.19
   2 -10  -1  196.70   15.67
  -2  10   1  181.03   13.95
  -2 -10   1  220.95   21.91
  -2  10   1  176.47   13.06
  -2 -10   1  175.30   15.79
  -2  10   1  159.62   17.93
   2 -10   0  117.00   10.10
   2  10   0  113.54   13.19
   2  10   0   92.44    8.88
  -2  10   0  116.25   12.84
  -2  10   0  115.27    9.86
  -2 -10   0  120.10   15.06
  -2  10   0   90.85    8.31
  -2 -10   0   99.31   10.25
   2  10   1   16.39    5.99
   2 -10   1   32.16    5.26
   2  10   1   29.84    5.42
  -2 -10  -1   22.67    5.95
  -2 -10  -1   24.60    6.69
  -2  10  -1   20.31    4.34
  -2  10  -1   26.43    5.20
  -2  10  -1   30.93    9.04
   2  10   2   12.84    5.55
   2  10   2   19.07    4.94
   2 -10   2   19.07    3.84
  -2  10  -2    9.29    3.87
  -2 -10  -2   21.59    6.04
  -2 -10  -2   14.92    6.13
  -2  10  -2   16.07    5.44
   2  10   3   -0.02    5.21
   2  10   3    5.50    6.60
   2 -10   3    1.40    4.05
   2  10   3    1.37    3.24
  -2  10  -3    1.21    2.51
  -2 -10  -3   -0.47    3.44
  -2 -10  -3    8.42    7.06
  -2  10  -3    5.12    4.62
   2  10   4   18.60    4.29
   2  10   4    5.17    7.39
   2 -10   4    5.01    4.53
   2  10   4    5.80    4.88
  -2 -10  -4    0.95    5.09
  -2  10  -4    4.06    2.70
  -2 -10  -4   -9.55    8.00
  -2  10  -4    5.20    5.52
   2  10   5   22.27    8.42
   2 -10   5   21.47    6.08
   2  10   5   32.12    5.40
  -2  10  -5   12.85    5.12
  -2  10  -5   16.68    5.32
  -2 -10  -5   31.90    7.38
   2  10   6   36.02    6.03
   2  10   6   28.21    9.53
   2 -10   6   39.12    6.84
  -2  10  -6   43.94    8.51
  -2  10  -6   25.22    4.35
  -2 -10  -6   31.66    8.85
   2  10   7   21.17    5.22
   2  10   7   21.28    8.85
   2 -10   7   25.77    6.71
  -2  10  -7   25.41    6.37
  -2 -10  -7   19.83    7.54
   2 -10   8   62.07   11.18
   2  10   8   77.38    8.43
  -2  10  -8   92.01   14.03
  -2 -10  -8   74.72   16.59
   2 -10   9   83.62    9.46
   2  10   9   70.34   10.96
  -2  10  -9   87.05   13.92
  -2 -10  -9   88.68   17.10
   2  10  10   33.45    6.38
   2 -10  10   44.66    9.98
  -2 -10 -10   58.40   10.72
   2  10  11   37.80    7.86
   2 -10  11   25.29    6.97
  -2 -10 -11   19.50    9.72
   2  10  12   17.64    7.29
   2 -10  12   24.22    8.65
  -2 -10 -12   23.75   12.80
   2  10  13    8.59    6.30
   2 -10  13    2.04    7.85
  -2 -10 -13    0.20   11.10
   2 -10  14    2.15    8.38
   2  10  14   13.52    6.88
  -2 -10 -14    3.36    8.62
   2 -10  15   12.28    7.84
   2  10  15    3.79    5.14
  -2 -10 -15    3.47    8.69
   2  10  16   -2.26    4.95
   2 -10  16   19.19    6.57
  -2 -10 -16   11.94   11.92
   2 -10  17    8.51    6.66
   2  10  17    0.31    5.14
   2  10  18   17.73    8.65
   2 -10  18   15.49    8.31
   2  10  19   18.23    6.64
   2 -10  19    8.83   10.97
   2  10  20    0.65    6.28
   2 -10  20   12.46    7.68
   2  10  21    0.18    6.25
   2 -10  21  -11.21    7.87
   2 -10  22   -3.20    8.07
   2  10  22   -3.39    6.14
   2  10  23   -0.55    6.18
   2 -10  23    9.35    8.25
   2  10  24   18.39    8.24
   2 -10  24   17.89   10.57
   2  10  25    5.23   10.75
   2 -10  25   35.33   10.94
   2  10  26    8.83   10.19
   2 -10  26    5.37    9.92
   2 -10  27    2.28    8.95
   2  10  27    1.93    7.15
   2 -10  28   -5.12   10.41
   2  10  28   -1.96    7.89
   2 -10  29   -4.00   13.19
   2  10  29    2.60   10.59
   2  11 -30    7.82   12.54
  -2 -11  30   -1.36   10.18
   2  11 -29   28.02   14.93
  -2 -11  29   13.85   11.30
   2  11 -28    1.00   12.09
  -2  11  28   10.60    9.45
  -2 -11  28    4.15   13.07
   2  11 -27   15.10   17.36
  -2 -11  27    8.90    9.35
  -2  11  27    7.12    9.07
   2  11 -26   12.35   11.60
  -2  11  26    6.58    8.48
  -2 -11  26   -3.62    8.98
   2  11 -25   32.51   10.80
  -2  11  25   -4.26    5.79
  -2 -11  25    9.73    9.00
   2  11 -24   10.91   14.49
  -2  11  24    4.56    7.66
  -2 -11  24   11.50   11.54
   2  11 -23    4.72    9.92
  -2  11  23   -2.32    6.64
  -2 -11  23   -7.28    7.73
   2  11 -22   34.67   12.67
  -2 -11  22   32.27   12.72
  -2  11  22   18.12    6.61
   2  11 -21    7.48    9.87
  -2 -11  21    5.67    7.62
  -2  11  21    5.59    6.70
   2  11 -20   10.98    8.59
  -2 -11  20   -1.79    6.40
  -2  11  20   -2.06    5.15
   2  11 -19    9.87   14.58
  -2  11  19   19.60    7.00
  -2 -11  19   23.21   11.29
   2  11 -18   -0.24    7.86
  -2  11  18    2.33    2.53
  -2  11  18    7.88    4.09
  -2 -11  18   -1.08    6.47
   2  11 -17    7.06    9.89
  -2 -11  17    5.21    8.13
  -2  11  17    1.79    4.66
  -2  11  17   -1.09    2.43
   2  11 -16   -7.62   10.38
  -2 -11  16    2.35    8.39
  -2  11  16   11.15    4.81
   2 -11 -15    2.44    4.75
   2  11 -15   11.72    7.90
  -2  11  15    4.57    4.43
  -2 -11  15   19.67    6.52
  -2  11  15    1.28    5.22
   2 -11 -14    4.00    3.99
   2  11 -14   -5.72    7.14
  -2 -11  14   -1.92    5.75
  -2  11  14    2.30    3.72
  -2  11  14   -1.01    4.56
   2  11 -13   11.41    7.48
   2 -11 -13    8.57    4.31
  -2  11  13    4.63    4.64
  -2  11  13   11.52    4.26
  -2 -11  13   10.05    6.05
   2 -11 -12   16.79    6.92
   2 -11 -12    3.66    4.05
   2  11 -12   10.40    9.63
  -2 -11  12    2.69    7.70
  -2  11  12    9.68    4.36
  -2  11  12   12.95    3.82
   2 -11 -11   38.20    5.19
   2  11 -11   93.25   12.27
   2 -11 -11   35.53    8.28
   2 -11 -11   23.85    3.01
  -2 -11  11   26.38    9.73
  -2  11  11   30.47    4.97
  -2  11  11   17.63    5.10
   2 -11 -10   23.82    4.55
   2  11 -10   14.63   10.19
   2 -11 -10   34.16    9.35
   2 -11 -10   16.98    3.53
  -2 -11  10   14.10    8.28
  -2  11  10   16.21    4.32
  -2  11  10   17.51    4.28
   2  11  -9   19.77    6.49
   2 -11  -9   10.72    3.36
   2 -11  -9   21.81    4.26
   2 -11  -9   22.37    6.89
  -2  11   9   17.98    4.24
  -2 -11   9   21.68    6.54
  -2  11   9   14.49    3.78
   2 -11  -8    8.85    3.24
   2 -11  -8   12.80    6.15
   2 -11  -8   10.42    3.67
   2  11  -8    8.41    6.02
  -2 -11   8   18.98    5.89
  -2  11   8    9.15    3.39
  -2  11   8   13.50    3.59
   2  11  -7   27.83    7.14
   2 -11  -7   27.13    4.73
   2 -11  -7   42.58    7.48
   2 -11  -7   28.28    3.58
  -2  11   7   25.00    4.38
  -2  11   7   24.78    4.21
  -2 -11   7   42.08    6.97
   2 -11  -6    3.60    3.48
   2  11  -6   10.19    5.28
   2 -11  -6    1.60    2.99
  -2 -11   6   18.75    5.39
  -2  11   6    3.87    3.13
   2 -11  -5   24.53    4.11
   2 -11  -5   41.42    6.46
   2 -11  -5   30.64    4.88
   2  11  -5   22.17    6.95
  -2  11   5   29.65    5.79
  -2  11   5   23.81    4.69
  -2 -11   5   14.68    6.23
   2 -11  -4   15.82    5.76
   2  11  -4   29.35    5.76
   2 -11  -4   15.72    4.09
   2 -11  -4   16.40    4.54
  -2  11   4   15.34    4.37
  -2 -11   4   22.13    6.00
  -2  11   4   22.22    4.23
   2 -11  -3   26.00    3.97
   2 -11  -3   21.78    5.62
   2  11  -3   28.28    8.02
  -2  11   3   21.54    3.83
  -2 -11   3   22.05    8.61
  -2  11   3   17.49    4.59
  -2  11   3   15.19    7.52
   2 -11  -2   62.53    7.56
   2  11  -2   44.11    7.57
   2 -11  -2   54.64    6.21
  -2  11   2   45.72    5.38
  -2 -11   2   41.55    7.59
  -2  11   2   34.11   11.82
  -2  11   2   48.74    6.45
   2 -11  -1   15.30    4.76
   2 -11  -1    8.63    3.36
   2  11  -1    3.93    4.93
  -2  11   1    7.78    3.62
  -2  11   1   10.51    4.16
  -2  11   1   12.96    6.44
  -2 -11   1   16.23    5.25
   2  11   0   44.75    7.21
   2 -11   0   49.71    7.31
  -2 -11   0   78.67   11.47
  -2  11   0   49.14    9.02
  -2  11   0   54.54    7.60
  -2  11   0   45.34    6.03
   2  11   1   28.86    8.35
   2 -11   1   46.79    6.24
  -2 -11  -1   44.11    9.49
  -2  11  -1   30.05    5.84
  -2  11  -1   16.66    5.08
  -2  11  -1   27.52   10.19
   2 -11   2   23.84    5.39
   2  11   2   34.35    7.23
  -2 -11  -2   47.21    9.20
  -2  11  -2   14.84    6.03
  -2  11  -2   15.80    4.49
   2 -11   3   32.99    6.29
   2  11   3   33.26    5.75
   2  11   3   36.23   10.79
  -2  11  -3   14.73    5.27
  -2  11  -3   30.23    5.35
  -2 -11  -3   38.12   10.08
   2 -11   4    9.58    4.48
   2  11   4   -4.77    7.53
   2  11   4    9.80    4.19
  -2 -11  -4    1.33    0.91
  -2  11  -4    2.37    3.74
  -2 -11  -4   -2.12    7.98
  -2  11  -4    2.80    3.83
  -2 -11  -4    2.25    1.03
   2  11   5   22.91   10.35
   2 -11   5   39.13    6.91
   2  11   5   35.95    8.00
  -2  11  -5   24.97    4.50
  -2 -11  -5   42.87   11.22
  -2  11  -5   20.58    8.74
   2  11   6   21.85    6.62
   2 -11   6    8.92    4.55
   2  11   6   18.44    8.62
  -2  11  -6   14.81    7.45
  -2 -11  -6   20.56   10.46
   2  11   7   17.70    8.83
   2 -11   7   20.85    7.38
   2  11   7   33.83    7.74
  -2 -11  -7   19.60   11.07
  -2  11  -7   35.53    8.85
   2  11   8   26.05    6.02
   2 -11   8   18.77    5.61
  -2 -11  -8   26.69    9.02
  -2  11  -8   30.81    7.41
   2  11   9   38.88    8.19
   2 -11   9   32.10    7.04
  -2  11  -9   41.25    8.64
  -2 -11  -9   38.63   14.05
   2 -11  10    4.58    4.95
   2  11  10    2.92    4.58
  -2 -11 -10    3.79    7.60
  -2  11 -10    9.17    6.27
   2 -11  11   19.41    5.93
   2  11  11   11.66    6.89
  -2 -11 -11   -4.45    9.01
  -2  11 -11   16.05    7.47
   2  11  12   -1.23    5.97
   2 -11  12   -4.68    5.48
  -2 -11 -12   -2.44   11.43
  -2  11 -12   -1.02    6.19
   2 -11  13    9.62    8.84
   2  11  13    8.88    7.13
  -2 -11 -13   21.90   12.13
   2 -11  14   15.23    8.50
   2  11  14    0.38    5.02
  -2 -11 -14   17.18    8.94
   2  11  15    9.64    5.80
   2 -11  15    9.54    9.52
  -2 -11 -15   27.80    9.98
   2  11  16   12.67    7.33
   2 -11  16    9.31    6.83
  -2 -11 -16   -9.11   13.40
   2  11  17   11.21    5.84
   2 -11  17   12.77    7.90
  -2 -11 -17    3.74    6.37
   2 -11  18   12.24   10.14
   2  11  18    2.06    7.56
   2  11  19   20.57    8.52
   2 -11  19   -2.16    8.40
   2 -11  20   34.63   14.60
   2  11  20   34.06    8.56
   2  11  21   -0.08    6.10
   2 -11  21    7.83    7.64
   2  11  22    4.01    7.10
   2 -11  22   17.12    9.12
   2 -11  23   -3.63    8.31
   2  11  23   -1.20    6.42
   2 -11  24    7.03    9.45
   2  11  24    7.28    7.26
   2  11  25   12.03    7.95
   2 -11  25    4.71   10.00
   2 -11  26   31.90   11.49
   2  11  26    5.98   11.62
   2  11  27   -0.72    7.51
   2 -11  27    7.98    9.69
   2 -11  28   -0.27   10.39
   2  11  28    6.20    7.79
   2  12 -29    8.35   13.89
  -2 -12  29    4.24   10.73
   2  12 -28   31.70   16.45
  -2 -12  28   22.20   12.01
   2  12 -27    2.94   11.89
  -2 -12  27    1.98    9.16
   2  12 -26    7.42   13.06
  -2 -12  26   15.81   10.02
   2  12 -25    9.51   10.90
  -2 -12  25   -4.30    8.60
  -2  12  25   -6.48    7.59
   2  12 -24  -14.68   11.04
  -2 -12  24    6.13    8.39
  -2  12  24   -6.40    7.36
   2  12 -23   -2.39   14.92
  -2  12  23    4.27    5.23
  -2 -12  23    1.37   10.24
   2  12 -22   -4.59   10.04
  -2  12  22    6.62    6.15
  -2 -12  22   -1.51    7.73
   2  12 -21    7.92    9.77
  -2  12  21    2.51    5.97
  -2 -12  21    2.46    7.83
   2  12 -20    2.84   12.26
  -2  12  20    7.55    6.20
  -2 -12  20   -4.44   10.01
   2  12 -19   -3.89    9.74
  -2  12  19   11.69    6.06
  -2 -12  19    4.70    7.74
   2  12 -18    4.63    8.30
  -2  12  18   -0.45    5.12
  -2 -12  18    9.31    7.23
   2  12 -17    4.31    8.12
  -2  12  17   -7.16    4.51
  -2 -12  17   19.58    6.48
   2  12 -16   22.08   11.58
  -2  12  16    1.87    5.11
  -2 -12  16   16.54    9.26
   2  12 -15   20.21    8.87
  -2 -12  15    4.26    7.43
  -2  12  15    8.65    3.94
   2  12 -14   -7.77    7.45
  -2  12  14   -0.66    3.74
  -2 -12  14   -0.56    5.84
   2  12 -13    9.81    8.38
   2 -12 -13    4.51    4.73
   2 -12 -13    5.65    6.23
  -2 -12  13   18.77    6.56
  -2  12  13   11.64    5.28
  -2  12  13    7.45    4.22
   2 -12 -12   43.05    8.64
   2  12 -12   28.45   11.37
   2 -12 -12    7.56    4.96
  -2  12  12   18.85    5.01
  -2  12  12   23.61    4.86
  -2 -12  12   20.23    9.97
   2  12 -11   30.25    8.77
   2 -12 -11   16.11    7.94
   2 -12 -11   22.33    5.38
   2 -12 -11   23.27    3.14
  -2  12  11   28.83    6.49
  -2 -12  11   17.93    7.60
  -2  12  11   37.30    5.41
   2 -12 -10   21.19    3.39
   2 -12 -10   20.46    8.03
   2 -12 -10   14.52    4.87
   2  12 -10   21.72   10.20
  -2 -12  10   13.32    7.14
  -2  12  10   13.56    4.48
  -2  12  10   25.04    4.33
   2 -12  -9    5.79    4.01
   2  12  -9    8.91    8.77
   2 -12  -9   14.45    6.38
  -2  12   9    4.74    3.64
  -2  12   9   12.54    3.72
  -2 -12   9    6.45    7.91
   2  12  -8    0.05    5.56
   2 -12  -8    2.50    3.40
   2 -12  -8    1.64    2.45
   2 -12  -8   14.37    5.76
  -2 -12   8   -4.14    5.15
  -2  12   8    1.58    3.82
  -2  12   8    1.44    3.20
   2 -12  -7    2.35    3.92
   2  12  -7   -5.87    7.71
   2 -12  -7   14.63    6.35
   2 -12  -7    9.76    3.41
  -2  12   7    3.68    3.16
  -2  12   7    7.80    3.69
  -2 -12   7    8.76    7.30
   2 -12  -6   20.13    4.10
   2 -12  -6   22.53    7.17
   2 -12  -6   34.47    5.51
   2  12  -6   27.99    7.54
  -2  12   6   22.40    5.12
  -2  12   6   30.47    4.89
  -2 -12   6   26.18    7.27
   2 -12  -5   11.76    3.90
   2 -12  -5   13.82    4.75
   2  12  -5   15.24    5.75
   2 -12  -5   11.30    7.58
  -2  12   5   14.36    3.53
  -2  12   5   19.42    4.31
  -2 -12   5   11.16    6.18
   2  12  -4   24.42    6.59
   2 -12  -4   21.31    4.84
   2 -12  -4   25.20    4.46
  -2  12   4   28.24    4.91
  -2  12   4   19.70    4.23
  -2 -12   4   26.45    6.65
   2 -12  -3   24.56    4.49
   2  12  -3   26.13    8.24
   2 -12  -3   28.51    6.42
  -2  12   3   14.12    4.93
  -2  12   3   15.83    8.35
  -2  12   3   14.26    4.31
  -2 -12   3   30.35    8.50
   2  12  -2   22.87    6.36
   2 -12  -2   17.36    4.97
   2 -12  -2   36.77    6.42
  -2 -12   2   37.16    7.28
  -2  12   2   28.64    5.58
  -2  12   2   19.31    4.62
  -2  12   2   24.19    8.12
   2  12  -1   93.90   13.06
   2 -12  -1   57.12    8.87
   2 -12  -1   93.82    9.97
  -2  12   1   58.46    7.72
  -2 -12   1   97.75   13.52
  -2  12   1   92.01    9.38
   2 -12   0   20.75    6.03
   2  12   0   26.57    6.20
   2 -12   0    8.08    4.30
  -2 -12   0   43.41    7.14
  -2  12   0   30.12    5.98
  -2  12   0   23.50    5.00
  -2  12   0   20.77    8.31
   2 -12   1   42.86    6.47
   2  12   1   29.25    8.35
  -2  12  -1   19.48    3.47
  -2  12  -1   16.04    5.22
  -2  12  -1   17.97    6.12
  -2  12  -1   21.04    8.11
  -2 -12  -1   51.71    9.79
   2 -12   2   26.91    5.02
   2  12   2   36.63    8.50
   2  12   2   34.57   10.88
  -2 -12  -2   22.14   10.97
  -2  12  -2   35.94   10.89
  -2  12  -2   27.71    4.27
  -2  12  -2   17.60    7.22
   2  12   3   16.56    5.40
   2  12   3   14.06    9.06
   2 -12   3   13.60    5.70
  -2 -12  -3    4.17    2.67
  -2  12  -3   10.21    4.65
  -2  12  -3   22.66    4.91
  -2 -12  -3   19.36    7.02
  -2 -12  -3   19.78    2.66
   2  12   4   36.81    6.42
   2  12   4   40.76   10.82
   2 -12   4   22.70    5.35
  -2  12  -4   16.57    5.43
  -2  12  -4   23.47    6.07
  -2 -12  -4   45.52    8.79
   2  12   5    1.62   12.24
   2  12   5   11.52    4.82
   2 -12   5   16.51    6.15
  -2 -12  -5    8.86    9.89
  -2  12  -5   18.62    7.13
   2  12   6    3.03    6.35
   2  12   6   14.88    8.04
   2 -12   6    7.86    5.72
  -2 -12  -6   12.94    9.01
  -2  12  -6    4.26    6.86
   2  12   7   12.08    4.91
   2  12   7   11.83    8.51
   2 -12   7    5.57    6.06
  -2 -12  -7   16.53    7.60
  -2  12  -7   -2.48    5.88
   2  12   8   36.28    8.15
   2 -12   8   31.65    6.83
  -2  12  -8   23.77   10.39
  -2 -12  -8   39.51   13.15
   2  12   9   36.39    6.50
   2 -12   9   26.92    7.07
  -2 -12  -9   44.74   10.52
  -2  12  -9   18.22    8.32
   2 -12  10   22.40    6.04
   2  12  10   32.25    7.73
  -2  12 -10    9.72    7.92
  -2 -12 -10    6.96   12.52
   2 -12  11    7.70    7.80
   2  12  11   17.05    6.81
  -2  12 -11    3.68   10.27
  -2 -12 -11    5.18   11.61
   2  12  12    3.36    6.45
   2 -12  12    2.72    5.64
  -2 -12 -12    0.02   11.67
  -2  12 -12    9.38    7.29
   2  12  13   13.18    7.67
   2 -12  13   21.59    9.19
  -2 -12 -13   27.95   13.91
  -2  12 -13    7.10   11.76
   2  12  14   18.96    7.69
   2 -12  14   11.23    7.42
  -2  12 -14    5.37    8.63
  -2 -12 -14   18.51   10.61
   2 -12  15   -1.48    6.50
   2  12  15   14.38    5.18
  -2 -12 -15   14.64    9.27
  -2  12 -15   -6.65    8.21
   2  12  16    4.75    8.20
   2 -12  16   23.71   10.10
  -2 -12 -16   18.20   14.02
  -2  12 -16   24.65   13.45
   2 -12  17    4.62   10.70
   2  12  17   17.30    6.47
  -2 -12 -17   11.34   11.14
   2 -12  18    0.17    7.68
   2  12  18    8.06    7.74
   2  12  19    3.08    5.61
   2 -12  19   -1.58    9.84
   2 -12  20    1.57    7.85
   2  12  20    0.14    6.03
   2  12  21   13.06    6.76
   2 -12  21   -1.82   11.29
   2 -12  22    8.00    8.18
   2  12  22    0.30    6.56
   2 -12  23    1.67    9.17
   2  12  23   17.27    7.40
   2  12  24    7.98    7.63
   2 -12  24    3.80    9.85
   2  12  25   22.46    9.24
   2 -12  25   20.67   11.87
   2  12  26   13.03    8.52
   2 -12  26    8.92   11.44
   2 -12  27   -1.02   11.90
   2  12  27   16.82   11.02
   2  13 -28   14.60   13.58
  -2 -13  28   -4.61   10.52
   2  13 -27   11.52   18.87
  -2 -13  27    9.12   14.02
   2  13 -26   -1.45   13.57
  -2 -13  26   15.58   10.19
   2  13 -25   15.92   12.83
  -2 -13  25    6.08   10.28
   2  13 -24   18.28   11.61
  -2 -13  24   -0.45    9.37
   2  13 -23    8.36   10.56
  -2 -13  23    1.35    8.86
   2  13 -22   -0.88   11.17
  -2 -13  22   25.15    9.19
  -2  13  22    7.30    6.87
   2  13 -21   16.53   14.34
  -2  13  21    6.52    6.22
  -2 -13  21   -4.61   10.99
   2  13 -20   29.44   11.37
  -2  13  20   15.24    6.90
  -2 -13  20    8.75    9.16
   2  13 -19    3.67   11.45
  -2 -13  19   12.75    9.06
  -2  13  19   19.95    6.76
   2  13 -18    3.13    9.49
  -2  13  18   10.24    5.37
  -2 -13  18    5.86    7.80
   2  13 -17   15.85   10.27
  -2  13  17   13.85    6.04
  -2 -13  17   17.67    8.85
   2  13 -16   12.05   13.28
  -2 -13  16   12.02   10.64
  -2  13  16   10.50    5.77
   2  13 -15   30.08    9.63
  -2  13  15    4.91    5.05
  -2 -13  15   19.18    7.90
   2  13 -14   18.91    9.77
  -2 -13  14   42.00    8.76
  -2  13  14   14.98    5.73
   2  13 -13   15.58    8.40
   2 -13 -13   11.57    8.59
  -2 -13  13   32.10    8.23
  -2  13  13   20.83    5.18
   2  13 -12    7.55   10.91
   2 -13 -12    7.53    7.78
  -2  13  12   13.03    4.57
  -2 -13  12   15.74    7.13
   2  13 -11   19.75    8.00
   2 -13 -11    8.26    7.72
  -2  13  11   17.21    5.68
  -2  13  11   10.07    4.63
  -2 -13  11   20.28    7.23
   2  13 -10    3.47    6.18
   2 -13 -10    1.04    3.98
   2 -13 -10   -0.22    6.29
  -2  13  10    1.91    3.65
  -2 -13  10   -5.47    5.42
  -2  13  10    3.71    3.46
   2  13  -9    5.49    6.67
   2 -13  -9    5.50    7.56
   2 -13  -9   -1.03    3.85
   2 -13  -9    1.60    2.23
  -2 -13   9    7.18    5.69
  -2  13   9   -1.47    3.22
  -2  13   9    9.18    3.47
   2  13  -8   20.45   10.06
   2 -13  -8   18.14    7.29
   2 -13  -8   20.41    5.10
   2 -13  -8   15.06    3.20
  -2  13   8    8.83    4.23
  -2  13   8   16.65    4.33
  -2 -13   8   24.26    9.86
   2 -13  -7   11.22    4.49
   2  13  -7    5.87    6.78
   2 -13  -7    4.54    7.15
   2 -13  -7    9.85    3.31
  -2  13   7   12.41    3.79
  -2 -13   7   18.80    6.37
  -2  13   7    4.94    4.42
   2 -13  -6   28.25    7.49
   2  13  -6   11.56    7.68
   2 -13  -6   19.16    4.15
   2 -13  -6   23.48    5.64
  -2  13   6   29.52    4.98
  -2 -13   6   23.26    9.60
  -2  13   6   23.97    4.42
   2  13  -5   19.22    8.53
   2 -13  -5    8.92    4.93
   2 -13  -5   14.44    3.74
   2 -13  -5   14.26    6.26
  -2  13   5   16.13    4.49
  -2 -13   5   15.87    8.43
  -2  13   5    9.94    4.01
   2  13  -4   23.96    9.99
   2 -13  -4   19.60    4.71
  -2 -13   4   32.69    9.93
  -2  13   4   30.63    5.76
  -2  13   4   22.97    4.82
   2  13  -3   22.25    8.34
   2 -13  -3   16.83    6.53
   2 -13  -3   12.74    4.80
  -2  13   3   18.21    4.12
  -2 -13   3   30.99    9.10
  -2  13   3   16.71    5.35
  -2  13   3   14.21    5.23
   2 -13  -2    4.33    4.19
   2  13  -2   12.04    8.00
   2 -13  -2   17.41    5.44
  -2  13   2    8.01    7.34
  -2  13   2   10.80    4.88
  -2  13   2    8.72    3.93
  -2 -13   2    5.42    7.98
   2 -13  -1   10.81    4.58
   2  13  -1   12.49    5.62
   2 -13  -1   15.49    5.91
  -2  13   1    2.25    4.12
  -2 -13   1   25.06    6.66
  -2  13   1   13.15    7.29
  -2  13   1   11.49    5.13
   2 -13   0    3.54    4.91
   2 -13   0   18.97    5.83
   2  13   0   18.74    7.23
  -2  13   0   11.40    5.00
  -2 -13   0   11.56    7.90
  -2  13   0   15.86    7.09
  -2  13   0    1.42    3.08
   2 -13   1   15.57    6.26
   2  13   1   28.93    5.63
  -2  13  -1    6.88    4.59
  -2  13  -1    2.73    3.38
  -2  13  -1    9.95    5.01
  -2 -13  -1   25.21    7.00
  -2  13  -1   13.93    7.66
   2  13   2   41.12   11.63
   2 -13   2   24.52    6.93
   2  13   2   21.31    8.27
  -2  13  -2   12.91    5.74
  -2 -13  -2   26.06   11.44
  -2  13  -2   55.39    9.26
  -2  13  -2   42.77    7.36
   2  13   3   10.99    5.64
   2 -13   3    9.72    6.00
   2  13   3   30.67    9.85
  -2  13  -3    5.21    6.08
  -2 -13  -3    6.70    2.41
  -2  13  -3   13.99    7.17
  -2 -13  -3    5.88    2.60
  -2 -13  -3   10.14    7.03
   2 -13   4   26.54    5.36
   2  13   4   39.94    8.22
   2  13   4   41.66   11.58
  -2 -13  -4   24.24   11.52
  -2  13  -4    9.82    5.98
   2 -13   5   10.02    6.90
   2  13   5   36.43   10.48
   2  13   5    9.51    5.38
  -2  13  -5   21.73    7.69
  -2 -13  -5    9.79    7.47
   2 -13   6   23.79    7.86
   2  13   6   36.39   10.16
   2  13   6   16.94    8.46
  -2 -13  -6   43.30   12.13
  -2  13  -6   21.33    8.86
   2  13   7    6.09    4.70
   2 -13   7    0.03    4.39
   2  13   7    7.13    8.22
  -2  13  -7   -0.21    5.14
  -2 -13  -7   10.73    7.42
   2 -13   8    7.72    7.37
   2  13   8    9.73    6.89
  -2  13  -8   10.17    8.84
  -2 -13  -8   13.48   11.74
   2  13   9   31.00    8.10
   2 -13   9   27.03    6.81
  -2 -13  -9   25.71   13.88
  -2  13  -9   15.30    7.93
   2  13  10   15.14    5.64
   2 -13  10   12.43    6.03
  -2  13 -10   17.22    7.49
  -2 -13 -10    4.67    9.05
   2 -13  11    6.66    8.27
   2  13  11   11.47    5.48
  -2  13 -11   13.74   10.33
  -2 -13 -11   16.85   10.20
   2  13  12   17.24    6.64
   2 -13  12   18.90    7.66
  -2 -13 -12   21.73   11.37
  -2  13 -12   54.75    9.89
   2 -13  13   15.86    9.14
   2  13  13    9.71    5.57
  -2  13 -13   13.43   11.75
  -2 -13 -13   20.59   10.43
   2 -13  14   12.75    7.94
   2  13  14   23.70    8.53
  -2  13 -14   18.32   10.11
  -2 -13 -14   16.07   14.72
   2  13  15   10.92    7.64
   2 -13  15    0.06    7.71
  -2  13 -15   27.51    9.98
  -2 -13 -15   10.21   14.08
   2  13  16    9.72    5.45
  -2 -13 -16  -11.09   10.07
  -2  13 -16    2.80    9.26
   2 -13  17   16.80    9.33
   2  13  17   18.78    9.09
  -2  13 -17   21.53   11.26
  -2 -13 -17    9.54   16.83
   2  13  18    5.83    6.42
   2 -13  18   33.72   11.69
  -2  13 -18    8.35   15.18
   2  13  19    0.59    6.21
   2 -13  19    5.24    7.97
  -2  13 -19    8.25    9.97
   2 -13  20   16.76    9.79
   2  13  20   22.58   10.19
  -2  13 -20    9.93   12.13
   2 -13  21  -14.92    8.70
   2  13  21    1.33    8.49
  -2  13 -21    6.69   11.14
   2 -13  22   12.36   11.93
   2  13  22  -15.09    8.54
  -2  13 -22   21.77   10.95
   2 -13  23   -2.63    9.11
   2  13  23   13.03    9.42
  -2  13 -23    7.36   12.80
   2 -13  24   -0.14    9.70
   2  13  24    1.16    9.48
  -2  13 -24    7.50   12.28
   2 -13  25    8.11   10.59
   2  13  25    7.33   10.47
   2 -13  26   12.16   14.88
   2  13  26    2.62   10.94
   2  14 -26   19.29   17.12
  -2 -14  26   -5.95   13.99
   2  14 -25   17.84   13.52
  -2 -14  25    2.32   10.56
   2  14 -24    3.64   16.30
  -2 -14  24    6.82   13.30
   2  14 -23   -0.09   10.61
  -2 -14  23   -1.39    8.73
   2  14 -22   22.31   18.17
  -2 -14  22   27.01   14.05
   2  14 -21    5.09   11.10
  -2 -14  21    3.63    8.40
   2  14 -20   -0.45   10.50
  -2 -14  20    4.57    7.92
   2  14 -19    5.70   11.44
  -2 -14  19   23.03    9.33
   2  14 -18   22.59   10.89
  -2  14  18    1.35    5.39
  -2 -14  18    8.18    8.00
   2  14 -17   28.03   11.52
  -2  14  17   16.75    6.31
  -2 -14  17   20.92    9.31
   2  14 -16    0.43   10.05
  -2  14  16    8.78    5.61
  -2 -14  16   19.99    8.21
   2  14 -15    6.28   10.88
  -2  14  15    1.24    4.32
  -2 -14  15    2.95    9.74
   2  14 -14   16.33    8.52
  -2  14  14    1.76    4.72
  -2 -14  14   20.68    8.00
   2  14 -13   -0.86   10.06
   2 -14 -13    6.20    6.90
  -2 -14  13    0.80    8.88
  -2  14  13    0.06    3.79
   2  14 -12   25.07    8.64
   2 -14 -12   -3.72    9.22
  -2  14  12    8.82    4.54
  -2 -14  12   11.37    7.07
   2  14 -11    4.27    6.91
   2 -14 -11    5.02    6.46
  -2  14  11   -1.31    3.63
  -2 -14  11    5.14    6.52
   2  14 -10    8.85    7.09
   2 -14 -10    9.26    7.14
  -2  14  10    3.55    3.78
  -2 -14  10    5.39    6.25
   2 -14  -9   15.75    7.19
   2  14  -9   17.28    6.79
  -2 -14   9    3.89    6.86
  -2  14   9   11.01    5.12
   2 -14  -8   29.84    8.93
   2  14  -8   44.19    9.38
  -2 -14   8   43.04    8.19
  -2  14   8   28.58    5.50
   2  14  -7   10.02    9.49
   2 -14  -7   24.03    7.58
  -2  14   7   12.56    4.85
  -2 -14   7    6.97    9.48
   2  14  -6    5.52    6.98
   2 -14  -6   10.01    7.15
  -2  14   6   11.51    4.20
  -2  14   6   14.66    4.82
  -2 -14   6   22.05    6.73
   2 -14  -5   45.66    9.15
   2  14  -5   50.28    9.58
  -2 -14   5   55.69    9.67
  -2  14   5   61.58    7.25
  -2  14   5   32.42    6.00
   2 -14  -4   68.94    9.92
   2  14  -4   46.03   11.82
  -2 -14   4   28.21   11.86
  -2  14   4   25.07    5.93
  -2  14   4   56.94    7.11
   2 -14  -3    5.71    5.20
   2  14  -3    4.08    7.84
   2 -14  -3    3.43    5.90
  -2  14   3   -1.12    3.88
  -2  14   3   13.78    4.84
  -2 -14   3    3.90    8.32
  -2  14   3    4.21    4.67
   2 -14  -2   14.31    5.91
   2  14  -2    5.15    7.31
  -2  14   2   -8.86    9.50
  -2 -14   2    5.15    8.05
  -2  14   2   -0.26    3.87
  -2  14   2    0.64    4.64
   2 -14  -1   15.40    6.71
   2  14  -1   10.65    8.27
  -2  14   1    7.53    4.96
  -2 -14   1   18.01    9.09
  -2  14   1   11.61    8.06
  -2  14   1   21.61    5.94
   2  14   0    0.57    4.86
   2 -14   0   -0.16    5.27
  -2  14   0   -3.73    4.85
  -2 -14   0   -9.72    5.68
  -2  14   0   14.26    7.06
   2  14   1   33.59   10.79
   2 -14   1    4.49    6.59
   2  14   1   15.71    5.63
  -2 -14  -1   14.70    6.50
  -2  14  -1   10.38    7.97
  -2  14  -1   -0.96    5.78
   2  14   2   41.22   13.02
   2 -14   2   55.51    7.10
   2  14   2   42.96    9.90
  -2 -14  -2   66.54   13.21
  -2 -14  -2   30.15    4.12
  -2  14  -2   26.45   13.51
  -2  14  -2   39.72    6.95
   2  14   3   60.91   15.33
   2 -14   3   52.95   10.19
   2  14   3   56.52    9.34
  -2 -14  -3   65.55   11.70
  -2  14  -3   73.65   15.80
  -2  14  -3   50.21    9.87
   2  14   4   15.18    7.33
   2  14   4    8.31   10.12
   2 -14   4   14.45    6.63
  -2 -14  -4   21.37    7.56
  -2  14  -4   11.22    6.91
  -2 -14  -4    5.84    1.39
  -2  14  -4    7.78    8.01
   2  14   5    7.70   10.38
   2 -14   5   13.39    7.00
   2  14   5   20.41    8.22
  -2  14  -5   12.46    7.15
  -2 -14  -5   26.26   11.61
   2  14   6   41.20   11.64
   2 -14   6   17.11    8.24
   2  14   6   27.69    6.79
  -2 -14  -6   35.28    9.87
  -2  14  -6   18.76    9.48
   2 -14   7    1.87    6.39
   2  14   7   -1.06    6.65
   2  14   7    1.76    5.49
  -2  14  -7    6.71    5.62
  -2 -14  -7    2.01    9.95
   2 -14   8   -0.41    6.64
   2  14   8   -2.69    6.29
  -2  14  -8    1.81    7.73
  -2 -14  -8    2.41   10.67
   2  14   9   -2.83    6.47
   2 -14   9    5.99    5.35
  -2  14  -9    6.34    6.29
  -2 -14  -9    6.91   11.54
   2  14  10   10.43    6.11
   2 -14  10   17.02    6.45
  -2  14 -10   12.71    7.63
  -2 -14 -10    3.78    9.26
   2 -14  11   -7.28    5.43
   2  14  11    3.61    4.91
  -2  14 -11    9.54    9.13
  -2 -14 -11  -14.56   11.51
   2  14  12   15.37    6.15
   2 -14  12   10.34    9.36
  -2 -14 -12   24.50   13.59
  -2  14 -12    9.45   11.61
   2  14  13   11.66    7.36
   2 -14  13    6.48    6.85
  -2 -14 -13   16.99   14.03
  -2  14 -13    9.08    8.47
   2  14  14   16.80    8.49
   2 -14  14    7.03    7.60
  -2  14 -14    5.11    9.14
  -2 -14 -14   21.89   14.39
   2 -14  15   20.93   11.21
   2  14  15   26.08    7.22
  -2 -14 -15    4.21   11.84
  -2  14 -15   15.98   10.74
   2 -14  16    9.39   10.36
   2  14  16   16.19    8.44
  -2 -14 -16   -2.58   15.51
  -2  14 -16    9.44   13.48
   2  14  17    6.51    6.13
   2 -14  17   -1.13   10.78
  -2 -14 -17   16.41   11.25
  -2  14 -17   46.15   14.57
   2 -14  18    3.31    7.16
   2  14  18   -6.91    8.03
  -2  14 -18   21.82   10.52
   2 -14  19   -7.08    7.45
   2  14  19   -0.61    5.84
  -2  14 -19   16.11   10.35
   2  14  20   21.06    7.58
   2 -14  20    2.57   13.06
  -2  14 -20   13.40   17.39
   2  14  21    6.44    6.74
  -2  14 -21    6.04   11.53
   2 -14  22  -20.90   12.45
   2  14  22    3.84    9.10
  -2  14 -22    7.12   15.70
   2 -14  23   -1.30    9.85
   2  14  23   -8.26    9.68
  -2  14 -23    0.94   12.41
   2 -14  24   26.23   11.93
   2  14  24   15.06   11.21
  -2  14 -24   14.73   15.53
   2  15 -25    4.42   18.66
  -2 -15  25   14.11   15.67
   2  15 -24   10.45   13.67
  -2 -15  24    8.00   10.38
   2  15 -23   15.60   17.06
  -2 -15  23   -0.17   13.86
   2  15 -22   -5.98   11.37
  -2 -15  22   -0.63    8.91
   2  15 -21    1.44   12.29
  -2 -15  21    9.98    9.71
   2  15 -20   -0.76   10.61
  -2 -15  20   -3.75    8.15
   2  15 -19    1.94   12.65
  -2 -15  19   26.43    9.70
   2  15 -18    8.04   10.86
  -2 -15  18   20.61    9.56
   2  15 -17   -8.60    8.58
  -2 -15  17    8.56    7.65
   2  15 -16   22.42   11.07
  -2 -15  16   21.44    9.37
   2  15 -15   23.49   15.66
  -2 -15  15   33.89   13.04
   2  15 -14   -6.81    7.79
  -2 -15  14    9.85    7.16
   2  15 -13    6.75    7.69
  -2 -15  13    1.85    6.62
  -2  15  13    0.17    3.95
   2 -15 -12    4.66    7.05
   2  15 -12    6.01    7.62
  -2  15  12    1.25    4.60
  -2 -15  12   -4.47    6.64
   2  15 -11    8.59    7.41
   2 -15 -11   -9.78    9.63
  -2  15  11    2.31    3.92
  -2 -15  11   18.00    7.10
   2 -15 -10    9.40    7.75
   2  15 -10   10.80    7.52
  -2 -15  10   17.51    9.63
  -2  15  10   -0.44    3.83
   2  15  -9   33.26    8.53
   2 -15  -9    9.66    8.41
  -2  15   9   14.92    4.92
  -2 -15   9   22.75   11.00
   2 -15  -8   -1.29    7.02
   2  15  -8    2.77    6.90
  -2 -15   8    7.10    6.80
  -2  15   8    4.63    4.15
   2  15  -7   14.23    7.65
   2 -15  -7   11.01    8.18
  -2 -15   7   23.58    7.69
  -2  15   7    6.12    4.73
   2  15  -6   15.76   10.66
   2 -15  -6   13.49    8.27
  -2 -15   6   33.62   11.01
  -2  15   6   18.20    5.28
   2 -15  -5    0.50    7.02
   2  15  -5    7.95    6.82
  -2  15   5    9.35    5.00
  -2 -15   5    8.68    6.83
   2 -15  -4    3.98    6.23
   2  15  -4    1.07    5.94
  -2 -15   4    3.42    8.55
  -2  15   4    1.25    4.66
   2 -15  -3    6.08    6.47
   2  15  -3   -0.70    8.51
  -2 -15   3    2.09    8.92
  -2  15   3    6.68    5.12
   2 -15  -2    2.92    6.18
   2  15  -2    6.97    8.08
  -2  15   2   13.24    7.92
  -2  15   2    4.37    5.29
  -2 -15   2    2.28    9.46
   2 -15  -1    2.96    6.27
   2  15  -1   -1.08    7.22
  -2 -15   1    4.49    8.31
  -2  15   1   -1.34    7.13
  -2  15   1    4.10    5.42
   2 -15   0    0.32    4.72
   2  15   0   12.04   10.88
   2  15   0    4.14    7.37
  -2  15   0   -2.46    5.57
  -2 -15   0    6.05    8.62
  -2  15   0   11.84    7.47
   2 -15   1   14.23    6.72
   2  15   1   20.22   11.61
   2  15   1    7.09    7.79
  -2  15  -1    6.48    6.18
  -2  15  -1    2.88   11.29
   2  15   2   16.36   14.30
   2 -15   2    9.30    7.11
   2  15   2    5.38    5.76
  -2 -15  -2   11.08   10.31
  -2 -15  -2    4.19    2.66
  -2  15  -2    9.58    6.53
  -2  15  -2   10.54    8.09
   2  15   3   12.26    6.10
   2 -15   3    7.69    6.76
   2  15   3   39.53   11.92
  -2 -15  -3    0.07    8.17
  -2  15  -3    7.07    8.60
  -2  15  -3    6.89    7.26
   2  15   4   25.50   12.21
   2  15   4   22.07    6.54
   2 -15   4   21.00    8.22
  -2  15  -4   16.48   12.61
  -2 -15  -4   15.50    9.15
  -2  15  -4   15.54    8.13
   2  15   5   27.17    9.23
   2 -15   5   21.09    6.61
   2  15   5   22.95   11.80
  -2  15  -5   27.90    9.05
  -2 -15  -5   17.46   12.33
  -2  15  -5   13.92   10.14
   2  15   6    8.52    7.92
   2  15   6   24.23   11.06
   2 -15   6   10.55    8.10
  -2  15  -6    6.26    8.17
  -2 -15  -6   16.16   12.25
   2  15   7   23.82    6.78
   2 -15   7   12.50    8.84
  -2 -15  -7   41.90   13.25
  -2  15  -7    7.16   10.08
   2 -15   8    1.62    5.64
   2  15   8    4.11    5.16
  -2 -15  -8   11.16   11.21
  -2  15  -8   -3.22    5.80
   2  15   9   17.45    6.13
   2 -15   9    6.23    6.26
  -2  15  -9    4.72    7.57
  -2 -15  -9   52.08   11.19
   2 -15  10    3.42    5.40
   2  15  10    5.99    5.49
  -2 -15 -10   -0.08    9.20
  -2  15 -10    1.30    6.72
   2 -15  11   15.40    6.16
   2  15  11   -5.41    5.78
  -2  15 -11    8.76    7.65
  -2 -15 -11   15.12    9.38
   2  15  12    0.93    5.06
   2 -15  12    4.61    8.20
  -2 -15 -12  -15.28   12.52
  -2  15 -12    9.19   10.20
   2 -15  13   17.81    9.26
   2  15  13   41.52    9.99
  -2 -15 -13    9.86   16.41
  -2  15 -13   27.78   11.56
   2 -15  14    7.86   11.19
   2  15  14   19.93    8.47
  -2  15 -14   23.96   12.81
  -2 -15 -14   -2.62   11.47
   2 -15  15   10.94    7.85
   2  15  15   11.97    5.70
  -2  15 -15   -2.27    9.39
  -2 -15 -15  -11.52   14.41
   2 -15  16    7.32    8.65
   2  15  16    6.69    8.34
  -2 -15 -16   12.93   15.09
  -2  15 -16   14.83   10.41
   2  15  17   11.90    6.51
   2 -15  17   15.10    8.32
  -2  15 -17   -3.27   10.75
  -2 -15 -17   12.36   15.81
   2 -15  18    7.41    8.44
   2  15  18    8.86    7.88
  -2  15 -18   -3.68   14.38
  -2 -15 -18   -0.21    6.69
   2 -15  19   28.51   12.77
   2  15  19   -2.49    8.63
  -2  15 -19    5.69   14.74
   2  15  20    5.29    6.31
   2 -15  20   -0.34    9.12
  -2  15 -20   14.96   11.80
   2  15  21   -1.69    7.02
   2 -15  21   23.17    9.59
  -2  15 -21    3.16   13.27
   2  15  22    7.52    7.37
   2 -15  22    8.31   13.90
  -2  15 -22   20.77   13.19
   2 -15  23   15.67   10.52
   2  15  23    1.70    7.35
  -2  15 -23    6.44   14.42
   2  16 -23   20.32   15.87
  -2 -16  23   22.93   12.23
   2  16 -22   10.42   13.03
  -2 -16  22   10.21   10.42
   2  16 -21    7.14   11.24
  -2 -16  21   -1.53    9.07
   2  16 -20   26.06   16.99
  -2 -16  20    9.64   14.94
   2  16 -19   31.68   17.93
  -2 -16  19   26.03   15.28
   2  16 -18   20.14   14.28
  -2 -16  18    6.20   12.97
   2  16 -17   -3.96    9.20
  -2 -16  17    8.23   10.79
   2  16 -16   13.82   10.27
  -2 -16  16   12.00    9.59
   2  16 -15   10.83    9.54
  -2 -16  15    4.57    8.89
   2  16 -14   -3.98   11.83
  -2 -16  14   14.80   11.24
   2  16 -13   -0.35    8.88
  -2 -16  13   12.10    7.83
   2  16 -12    7.69    8.28
  -2 -16  12    0.40    7.64
   2  16 -11   -2.14   10.76
  -2 -16  11    8.59   10.12
   2  16 -10    2.63   10.16
  -2 -16  10    5.59    9.51
   2  16  -9   11.17   10.02
  -2 -16   9    1.65    7.15
   2  16  -8    8.53   10.43
  -2  16   8    9.89    4.41
  -2 -16   8   12.44   10.43
   2 -16  -7   47.63   10.84
   2  16  -7   46.13   13.71
  -2 -16   7   31.34   13.97
  -2  16   7   32.41    6.71
   2 -16  -6   64.94   11.19
   2  16  -6   42.43   11.06
  -2 -16   6   48.24   10.76
  -2  16   6   44.33    7.66
   2  16  -5   36.57   11.38
   2 -16  -5   29.62    9.57
  -2  16   5   21.26    6.23
  -2 -16   5   14.25   12.08
   2 -16  -4   12.78    8.67
   2  16  -4   25.35    7.44
  -2  16   4   13.42    5.72
  -2 -16   4   16.18    8.47
   2  16  -3    7.59    9.64
   2 -16  -3    6.22    8.87
  -2 -16   3   32.81   10.64
  -2  16   3   12.44    6.15
   2  16  -2   26.79   10.10
   2 -16  -2   12.54    9.21
  -2 -16   2   13.00   11.12
  -2  16   2   15.44    6.55
   2  16  -1   13.67    8.68
   2 -16  -1   -7.48    7.98
   2  16  -1   12.19   15.00
  -2 -16   1   31.04    7.83
  -2  16   1    4.15    9.45
  -2  16   1   10.97    5.24
   2  16   0   22.56    7.26
   2  16   0   29.48   20.72
   2 -16   0   34.54    8.76
  -2 -16   0   17.61    8.69
  -2  16   0   20.21   10.14
   2  16   1   21.25    6.92
   2 -16   1    7.63    8.02
   2  16   1   15.96   13.61
  -2  16  -1   20.34    9.68
  -2 -16  -1   30.73    9.80
  -2  16  -1   14.73    7.52
   2  16   2   25.68    6.99
   2  16   2   47.50   13.55
   2 -16   2   24.56    8.43
  -2 -16  -2   15.32   10.13
  -2  16  -2   13.79    7.83
  -2  16  -2   14.20   10.37
   2  16   3   40.48   13.67
   2  16   3   39.81   10.20
   2 -16   3   28.31    9.32
  -2  16  -3   12.01    6.35
  -2 -16  -3   18.73    9.67
  -2  16  -3    8.12   10.92
   2  16   4   48.45   11.96
   2  16   4   30.04   15.14
   2 -16   4   53.00   10.57
  -2 -16  -4   55.51   12.19
  -2  16  -4   17.95   13.22
  -2  16  -4   35.01   11.24
   2  16   5   39.78   10.59
   2  16   5   39.62   15.20
   2 -16   5   30.86   10.78
  -2  16  -5   24.41   10.17
  -2 -16  -5   44.06   14.36
  -2  16  -5   28.37   12.64
   2  16   6   -0.77    8.01
   2  16   6   13.95    6.86
   2 -16   6    3.90    8.24
  -2  16  -6   10.82    6.50
  -2  16  -6   20.44   12.76
  -2 -16  -6    1.91   12.39
   2  16   7   -0.11    8.16
   2 -16   7    2.84    8.37
  -2  16  -7   14.25    8.97
  -2 -16  -7   31.00   13.13
   2  16   8   -3.95    7.00
   2 -16   8   13.26    7.31
  -2  16  -8   -6.19    6.22
  -2 -16  -8    4.39   11.50
   2  16   9    7.61    7.36
   2 -16   9    5.50    8.08
  -2  16  -9   -2.23    8.74
  -2 -16  -9   -5.17   12.98
   2  16  10    3.88    7.46
   2 -16  10    6.85    8.68
  -2 -16 -10   -0.20   13.14
  -2  16 -10   13.96    9.71
   2  16  11   -4.07    6.67
   2 -16  11    2.71    8.49
  -2 -16 -11   -0.27    8.87
  -2  16 -11    0.61    7.45
   2  16  12   -1.12    5.07
   2 -16  12   -3.68    6.56
  -2  16 -12    4.71    7.88
  -2 -16 -12   -9.09    9.60
   2 -16  13   28.62   10.83
   2  16  13   11.27    8.81
  -2 -16 -13   31.48   15.61
  -2  16 -13    2.73   12.74
   2 -16  14    6.81    7.84
   2  16  14   14.63    8.67
  -2  16 -14    2.74    9.72
  -2 -16 -14   26.17   14.89
   2 -16  15   -0.61   11.37
   2  16  15    8.27    6.30
  -2  16 -15   16.44   10.27
  -2 -16 -15   16.21   11.99
   2 -16  16   12.51   11.19
   2  16  16    2.86    8.50
  -2  16 -16    0.91   13.76
  -2 -16 -16   16.66   15.72
   2 -16  17   12.54   10.97
   2  16  17   -1.17    6.23
  -2 -16 -17    6.35   14.47
  -2  16 -17    8.48   13.60
   2 -16  18  -11.08   10.81
   2  16  18    7.98    7.79
  -2 -16 -18   -0.96    6.54
  -2  16 -18    9.54   13.77
   2 -16  19   -0.31    8.05
   2  16  19   -6.67    7.86
  -2  16 -19    8.51   10.26
   2 -16  20   -1.55    8.53
  -2  16 -20   -0.95   11.66
   2 -16  21   24.81   15.52
  -2  16 -21   12.13   18.77
   2  17 -20   22.63   15.63
  -2 -17  20   -8.65   12.81
   2  17 -19   17.89   11.63
  -2 -17  19    2.90   10.27
   2  17 -18   -0.35   11.13
  -2 -17  18  -14.30    9.69
   2  17 -17    6.47   13.88
  -2 -17  17   -1.20   12.31
   2  17 -16   10.00   14.81
  -2 -17  16   10.81   12.91
   2  17 -15    9.72    9.99
  -2 -17  15    7.16    8.67
   2  17 -14   12.68   12.26
  -2 -17  14   -0.68   11.84
   2  17 -13   -3.93    8.45
  -2 -17  13   -0.20    8.13
   2  17 -12    5.44   11.66
  -2 -17  12    5.83   10.89
   2  17 -11    3.86    8.51
  -2 -17  11    3.63    7.97
   2  17 -10   -0.88    7.70
  -2 -17  10    4.10    7.59
   2  17  -9    4.65    7.85
  -2 -17   9    3.16    7.85
   2  17  -8   11.80    9.04
  -2 -17   8   13.70    8.74
   2  17  -7    3.43    9.20
  -2 -17   7   23.89    9.21
   2  17  -6   29.00   11.18
  -2 -17   6    0.91   11.38
   2  17  -5   29.87    8.86
  -2 -17   5   13.42   12.49
   2  17  -4   11.53    8.33
  -2 -17   4   -7.74    7.07
   2  17  -3   16.01    7.04
  -2  17   3    2.10    6.55
  -2 -17   3    8.00   11.32
   2  17  -2   21.45   16.25
   2  17  -2   13.67    9.77
  -2  17   2   13.65    6.74
  -2 -17   2   15.94   11.85
   2  17  -1    9.29   17.69
   2 -17  -1    4.30    8.28
   2  17  -1    9.33    6.76
  -2  17   1   -5.25    6.10
  -2  17   1    2.73    5.35
  -2 -17   1   19.50    7.91
   2  17   0   16.12   14.92
   2  17   0    8.22    7.46
   2 -17   0   19.34    9.26
  -2 -17   0   49.41   10.81
  -2  17   0   10.20   13.87
  -2  17   0   17.67    7.83
   2 -17   1    7.79    8.39
   2  17   1   -8.76   14.14
   2  17   1   14.23    8.75
  -2  17  -1   -2.22    8.90
  -2 -17  -1   23.59   11.68
  -2  17  -1    2.56    6.92
   2  17   2   16.91    9.45
   2 -17   2   12.12    8.51
   2  17   2   22.85   14.15
  -2 -17  -2    3.43   13.06
  -2  17  -2    4.89   12.84
  -2  17  -2   16.28    7.63
   2  17   3   18.59   13.98
   2 -17   3   12.38    6.99
   2  17   3   13.84    9.33
  -2  17  -3   27.22    8.69
  -2  17  -3    4.97   10.81
  -2 -17  -3   31.75   14.13
   2  17   4    2.10    8.17
   2  17   4   11.47   15.60
   2 -17   4   -1.67    5.97
  -2  17  -4    8.17    9.68
  -2  17  -4    6.61    5.99
  -2 -17  -4    8.18   11.59
   2  17   5   28.12   14.38
   2  17   5   24.83    9.34
   2 -17   5    9.90    7.77
  -2 -17  -5   31.40   14.16
  -2  17  -5   19.00    9.22
  -2  17  -5   12.28   14.87
   2  17   6   21.34    9.39
   2 -17   6   18.02    9.50
  -2 -17  -6   24.25   14.66
  -2  17  -6   12.20    9.65
  -2  17  -6   16.37   10.81
   2 -17   7   16.32    8.78
   2  17   7    3.55    8.29
  -2  17  -7    0.24   10.25
  -2 -17  -7   25.19   10.60
  -2  17  -7    1.70    6.68
   2 -17   8   11.65    9.44
   2  17   8   19.96    8.42
  -2 -17  -8   -1.30   10.57
  -2  17  -8    8.42   10.06
   2 -17   9    1.55    7.30
   2  17   9    8.66    6.30
  -2 -17  -9   15.55   10.68
  -2  17  -9   18.07   10.25
   2 -17  10   -5.84    6.21
   2  17  10    4.09    5.58
  -2  17 -10   16.14    7.49
  -2 -17 -10   -1.74   10.00
   2  17  11    4.22    8.42
   2 -17  11   10.53    9.71
  -2 -17 -11   -3.16   15.09
  -2  17 -11   16.69   10.78
   2 -17  12   -2.71   10.32
   2  17  12    8.50    8.86
  -2  17 -12   18.23   11.92
  -2 -17 -12   22.22   15.24
   2  17  13   -0.09    5.99
   2 -17  13   13.14    7.07
  -2 -17 -13    5.15   11.39
  -2  17 -13    4.62    8.52
   2  17  14   -3.49    8.98
   2 -17  14   15.39   11.00
  -2  17 -14   27.80   13.12
  -2 -17 -14    9.61   15.83
   2  17  15   29.32   10.18
   2 -17  15    4.67    9.20
  -2  17 -15   19.78   14.50
   2 -17  16    2.56    8.14
  -2  17 -16   -5.27    9.29
   2 -17  17    0.86    9.15
  -2  17 -17   25.27   11.74
   2 -17  18   17.24    9.83
  -2  17 -18   12.03   12.83
   2  18 -18   -8.90   11.12
  -2 -18  18   15.14    9.88
   2  18 -17    5.82   11.92
  -2 -18  17   19.87   10.71
   2  18 -16   -9.72   12.77
  -2 -18  16    8.17   11.87
   2  18 -15   11.69   10.56
  -2 -18  15    3.42   13.29
   2  18 -14    6.27   10.14
  -2 -18  14   13.68    9.54
   2  18 -13   18.22   14.43
  -2 -18  13   16.80   13.65
   2  18 -12   -4.76    8.50
  -2 -18  12    7.47    8.40
   2  18 -11   27.34   10.35
  -2 -18  11   11.35   10.07
   2  18 -10   17.25   12.99
  -2 -18  10    8.44   12.56
   2  18  -9    7.36   12.16
  -2 -18   9   15.35   12.67
   2  18  -8   25.37   11.75
  -2 -18   8   -0.83   12.40
   2  18  -7    9.27   10.70
  -2 -18   7   10.49   12.29
   2  18  -6   26.44    9.17
  -2 -18   6    5.67   12.99
   2  18  -5   20.33    9.01
  -2 -18   5   11.93   10.05
   2  18  -4    7.16   11.45
  -2 -18   4   28.35   12.66
   2  18  -3   11.74   15.22
   2  18  -3   -1.75    6.58
  -2 -18   3   -1.93    8.00
   2  18  -2   18.95   11.71
   2  18  -2   47.37   18.79
  -2 -18   2   15.08   13.14
   2  18  -1   -0.65   18.65
   2  18  -1   29.22    9.01
   2  18   0   20.19   16.55
   2  18   0   18.72   10.58
  -2 -18   0   29.88   13.90
  -2  18   0    5.21    6.80
   2  18   1    5.12    9.69
   2  18   1   19.96   16.44
  -2 -18  -1   19.14   13.76
  -2  18  -1   11.97   14.47
   2  18   2   19.98   20.00
   2  18   2   18.02   10.46
  -2  18  -2    9.25   11.29
  -2 -18  -2   20.15   10.69
   2  18   3   28.18   15.44
   2  18   3   20.66    7.46
  -2 -18  -3    6.15   11.00
  -2  18  -3    9.50   11.30
   2  18   4   24.52   13.46
   2  18   4    1.00    6.79
  -2  18  -4    4.06    8.63
  -2  18  -4    1.08   14.30
  -2 -18  -4   25.91   13.16
   2  18   5    9.08    8.46
   2  18   5   -1.14    7.35
  -2  18  -5    3.47   13.00
  -2 -18  -5   -3.63   13.15
  -2  18  -5    6.92    8.37
   2 -18   6    9.50    9.17
   2  18   6    2.51    8.84
  -2  18  -6   -3.60   10.49
  -2  18  -6    7.04    8.89
  -2 -18  -6    9.98   13.84
   2  18   7   16.79    9.38
   2 -18   7    4.35    9.55
  -2  18  -7   14.03    9.59
  -2 -18  -7   -1.21   14.92
  -2  18  -7   -3.11   10.90
   2  18   8    7.49    9.55
   2 -18   8   17.33   11.03
  -2 -18  -8   13.65   12.69
  -2  18  -8   23.03    8.34
  -2  18  -8   19.83   13.04
   2  18   9   19.61    8.31
   2 -18   9   28.87   12.16
  -2 -18  -9   46.72   14.07
  -2  18  -9   21.65   12.66
  -2  18  -9   19.95   18.18
   2 -18  10   -1.84   11.21
   2  18  10   22.53    9.37
  -2 -18 -10   27.26   16.48
  -2  18 -10    7.48   11.80
   2 -18  11   10.30    7.77
   2  18  11   13.80    8.93
  -2  18 -11   -7.20    8.05
   2 -18  12   -0.18    7.81
  -2  18 -12   10.95    8.58
   2 -18  13    5.51   10.94
  -2  18 -13   10.37   12.53
   2 -18  14    6.93    8.48
  -2  18 -14    4.04    9.66
   2 -18  15   -5.39   10.81
  -2  18 -15    1.12    9.14
   2 -18  16   25.27   13.25
  -2  18 -16    2.73   15.26
   2  19 -14  -11.06    9.30
  -2 -19  14    6.86    9.54
   2  19 -13   -7.59   13.57
  -2 -19  13   18.76   13.20
   2  19 -12    4.95   10.50
  -2 -19  12   13.02    9.90
   2  19 -11   28.66   15.48
  -2 -19  11   22.45   15.75
   2  19 -10    3.31   13.64
  -2 -19  10   12.79    9.69
   2  19  -9   19.89    8.59
  -2 -19   9  -13.45    9.81
   2  19  -8    6.54    8.63
  -2 -19   8    9.52    9.68
   2  19  -7    0.99    8.45
  -2 -19   7    9.37    8.89
   2  19  -6   11.63   11.43
  -2 -19   6    5.99    9.46
   2  19  -5   -4.29   10.03
  -2 -19   5   10.43   11.38
   2  19  -4  -15.06   16.98
   2  19  -4    6.03    9.41
  -2 -19   4   -1.95   10.55
   2  19  -3    8.38    8.01
   2  19  -3   27.83   19.18
  -2 -19   3    4.21    9.42
   2  19  -2    8.43   23.43
   2  19  -2    0.28   10.38
  -2 -19   2   10.82   12.26
   2  19  -1   26.00   19.83
   2  19  -1   13.58    9.21
  -2 -19   1   41.88   12.56
   2  19   0    4.43   10.74
   2  19   0   20.71   16.81
  -2 -19   0    2.98   13.63
   2  19   1   39.26   20.93
   2  19   1   12.20   10.09
  -2  19  -1    0.36    6.79
  -2 -19  -1    5.63   10.52
   2  19   2   -6.95    6.38
   2  19   2   21.15   12.37
  -2 -19  -2   11.96   12.29
  -2  19  -2   -7.72   12.69
   2  19   3  -11.05   18.95
   2  19   3   11.84    9.47
  -2 -19  -3    9.77   12.74
  -2  19  -3  -15.80   13.55
   2  19   4   -4.14    9.37
   2  19   4   21.32    9.14
  -2 -19  -4  -13.74   14.24
  -2  19  -4    4.82   10.14
   2  19   5   -1.36    8.39
  -2  19  -5    3.04    9.54
  -2  19  -6   -4.49   11.53
  -2  19  -7   25.87   14.71
  -2  19  -8   23.56   13.29
  -2  19  -9   11.93   12.54
  -2  19 -10    4.54   16.63
  -2  19 -11   12.64   17.48
  -2  19 -12   -6.97   12.42
  -2 -20  10    5.90   10.43
   2  20  -9   20.12   10.64
  -2 -20   9    9.16   15.58
   2  20  -8   14.03   12.53
  -2 -20   8    3.54   13.45
   2  20  -7    2.61   11.68
  -2 -20   7    9.53   13.67
   2  20  -6  -14.14   22.52
   2  20  -6    5.10    8.46
  -2 -20   6   12.29   12.87
   2  20  -5  -12.97   25.78
   2  20  -5    2.48    7.61
  -2 -20   5    0.43   11.72
   2  20  -4   -0.26    8.23
   2  20  -4   -1.53   18.87
  -2 -20   4    8.48    9.82
   2  20  -3   10.12   12.10
   2  20  -3   15.12   22.12
  -2 -20   3   23.77   15.14
   2  20  -2   -0.70   18.03
   2  20  -2    0.01   10.34
  -2 -20   2   11.09   14.13
   2  20  -1   69.74   28.56
   2  20  -1   12.92    9.08
   2  20   0   30.70   21.43
   2  20   1   -5.38   17.21
   2  20   2  -17.15   21.49
  -2  20  -2   11.94    7.38
   2  20   3   -5.03    9.51
  -2  20  -3   20.12   11.78
  -2  20  -4   -3.37   10.94
  -2  20  -5  -11.74   12.56
  -2  20  -6    9.54   12.60
  -2  20  -7    8.79   12.82
  -2  20  -8   -0.10   11.78
  -3   0  36   -3.95   10.45
  -3   0  36   13.70   13.21
  -3   0  35   -7.48   13.10
  -3   0  35    3.46   13.63
  -3   0  34   -5.67   18.74
  -3   0  34    9.39   10.07
  -3   0  33   -4.77    5.99
  -3   0  33   43.92   11.26
  -3   0  33   28.99   15.94
  -3   0  32  -15.46    5.87
  -3   0  32   11.56   10.04
  -3   0  32    9.70   14.89
  -3   0  31   -7.94    8.81
  -3   0  31   19.55    9.34
  -3   0  31   13.83   18.44
  -3   0  30   65.71   18.76
  -3   0  30   86.34   24.26
  -3   0  29    3.55   12.36
  -3   0  29    0.42    7.48
  -3   0  28   19.50   12.52
  -3   0  28   33.14   15.82
  -3   0  27   13.41    8.32
  -3   0  26   11.43    7.54
  -3   0  25   12.55    7.35
  -3   0  24   -4.45    6.02
  -3   0  23   -2.51    5.73
  -3   0  22   -4.27    7.55
  -3   0  21    7.12    5.89
  -3   0  20   51.10    8.96
  -3   0  19   71.29    9.70
  -3   0  18    2.60    4.54
  -3   0  17   29.80    7.81
   3   0 -16   21.06    4.09
  -3   0  16   26.09    5.63
   3   0 -15  101.35    8.78
  -3   0  15  120.14   13.01
   3   0 -14    7.74    3.07
  -3   0  14    3.42    4.34
   3   0 -13    1.07    2.80
  -3   0  13   -4.34    3.75
  -3   0  13   -9.43    4.14
   3   0 -12  442.90   35.77
  -3   0  12  519.07   41.34
  -3   0  12  520.64   45.06
  -3   0  12  432.92   41.62
   3   0 -11   -1.73    2.77
  -3   0  11    3.98    4.03
  -3   0  11    0.16    3.31
   3   0 -10   10.41    4.13
  -3   0  10    8.86    5.01
  -3   0  10    8.71    4.64
   3   0  -9  127.17   10.41
  -3   0   9  131.12   10.13
  -3   0   9  134.75   11.87
   3   0  -8  150.16   12.13
  -3   0   8  153.14   13.10
  -3   0   8  170.77   11.61
   3   0  -7   28.43    4.87
   3   0  -7   17.53    4.70
  -3   0   7   30.54    7.87
  -3   0   7   33.85    4.36
   3   0  -6   99.38    8.59
   3   0  -6   90.04    6.40
   3   0  -6   93.55    8.21
  -3   0   6   92.91    8.64
  -3   0   6  102.80    9.39
   3   0  -5   50.66    5.49
   3   0  -5   55.25    5.75
   3   0  -5   50.91    4.21
  -3   0   5   49.33    6.41
  -3   0   5   39.99    4.58
  -3   0   5   53.75    5.11
   3   0  -4   97.26    8.24
   3   0  -4   96.91    7.17
   3   0  -4   98.39    8.81
  -3   0   4   89.69    8.73
  -3   0   4   98.98    7.03
  -3   0   4   91.68    7.93
   3   0  -3   -0.62    1.89
   3   0  -3    0.74    2.38
   3   0  -3    4.10    2.74
  -3   0   3    2.01    3.00
  -3   0   3    0.58    3.42
  -3   0   3   -1.88    2.36
   3   0  -2   61.58    4.99
   3   0  -2   65.06    5.62
   3   0  -2   66.92    6.33
  -3   0   2   66.67    6.14
  -3   0   2   60.33    5.68
  -3   0   2   60.93    5.10
   3   0  -1   57.56    5.44
   3   0  -1   70.09    5.72
   3   0  -1   67.27    5.25
  -3   0   1   72.98    6.24
  -3   0   1   63.58    6.55
  -3   0   1   58.79    6.37
   3   0   0   -0.82    4.52
   3   0   0    0.63    2.71
   3   0   0    1.16    2.61
  -3   0   0    4.39    2.51
  -3   0   0   -0.82    4.24
  -3   0   0    3.28    2.94
   3   0   1  116.30    9.56
   3   0   1  100.83    7.44
   3   0   1   93.93    8.79
  -3   0  -1  100.52    6.94
  -3   0  -1   97.08    7.85
  -3   0  -1   87.45   10.57
   3   0   2   47.82    5.43
   3   0   2   46.67    4.84
   3   0   2   52.80    7.63
  -3   0  -2   54.33    5.33
  -3   0  -2   44.87    8.72
   3   0   3   84.02    9.52
   3   0   3   84.65   14.24
   3   0   3   92.14    5.79
   3   0   3   87.91    7.42
  -3   0  -3   94.47   16.13
  -3   0  -3   91.95    7.11
   3   0   4   20.96    7.48
   3   0   4   37.02    6.61
  -3   0  -4   23.64    5.36
  -3   0  -4   11.62   11.93
   3   0   5  154.20   13.01
   3   0   5  160.11   17.14
  -3   0  -5  164.27   10.83
  -3   0  -5  163.45   12.04
  -3   0  -5  156.91   19.34
   3   0   6  135.41   17.28
   3   0   6  133.70   11.61
  -3   0  -6  146.12   10.99
   3   0   7    3.85    6.88
   3   0   7   12.09    4.80
  -3   0  -7   13.69    3.81
   3   0   8   -2.19    4.02
   3   0   8    6.82    7.88
  -3   0  -8    0.51    4.09
   3   0   9  503.90   51.79
   3   0   9  518.22   43.15
  -3   0  -9  469.80   39.38
   3   0  10    4.29    5.72
   3   0  10    1.67    5.67
  -3   0 -10   -2.80    3.37
   3   0  11   11.70    6.29
   3   0  11    5.86    6.47
  -3   0 -11    2.44    3.51
   3   0  12   97.36   10.88
   3   0  13   40.26    7.53
   3   0  14   18.15    5.99
   3   0  15    4.46    5.21
   3   0  16   70.75    9.90
   3   0  17   58.08    9.56
   3   0  18   -3.02    5.62
   3   0  19   13.06    9.27
   3   0  20   -1.38    6.24
   3   0  21    5.57    6.47
   3   0  22    7.32    7.38
   3   0  23    8.43    7.63
   3   0  24   18.72   11.93
   3   0  25    9.34    7.62
   3   0  26    4.52    8.08
   3   0  27   27.79   11.75
   3   0  28    5.38    8.86
   3   0  29   -0.85    8.30
   3   0  30   20.74   11.13
   3   0  31   13.34   10.89
   3   0  32    2.67    9.96
   3   0  33    9.26   10.88
  -3  -1  36   26.33   13.14
  -3   1  36    0.26   12.89
  -3   1  36  -12.27   11.02
  -3  -1  36    2.96   10.56
  -3  -1  35   17.93   17.11
  -3  -1  35  -20.70    9.64
  -3   1  35   25.53    9.87
  -3   1  35   -3.98    6.17
  -3   1  35    5.32   12.91
  -3   1  34    2.21    9.65
  -3   1  34    7.50   21.36
  -3   1  34   19.18   14.38
  -3  -1  34    9.99   14.73
  -3  -1  34   14.69   20.23
  -3   1  33   -0.24   14.82
  -3  -1  33    2.89    9.55
  -3   1  33    9.27    8.06
  -3  -1  33    6.33   14.18
  -3   1  33    2.81    9.90
  -3  -1  32   23.63   17.10
  -3   1  32   25.78   10.33
  -3  -1  32   23.76   14.62
  -3   1  32   13.51   18.21
  -3   1  31   42.78   22.77
  -3  -1  31   18.85   11.15
  -3   1  31   20.32   13.27
  -3   1  30   51.55   15.04
  -3   1  30    8.13    8.40
  -3  -1  30    5.04    5.93
  -3  -1  30    9.37   13.13
  -3   1  29   18.11    9.39
  -3  -1  29   17.36   10.36
  -3   1  29   64.77   21.54
  -3   1  28   11.34    8.16
  -3   1  28    6.58   12.82
  -3  -1  28   18.83   11.92
  -3  -1  28   17.62    8.76
  -3  -1  27    7.77    8.80
  -3  -1  27   14.52    8.56
  -3   1  27    1.12   16.44
  -3   1  27   24.36    8.82
  -3   1  26  -17.45   11.38
  -3   1  26   13.12    7.53
  -3  -1  26   17.19    8.40
  -3  -1  26   22.26    7.80
  -3   1  25   13.65    7.23
  -3  -1  25    8.22    9.99
  -3   1  25   19.80   10.19
  -3  -1  25   18.38    8.50
  -3   1  24    1.55    5.54
  -3   1  24   15.08    8.04
  -3  -1  24   -7.26    6.63
  -3   1  23    5.52    9.83
  -3   1  23    0.49    7.04
  -3  -1  23   -0.38    5.87
  -3   1  22    9.90    6.24
  -3   1  22   19.98   10.99
  -3  -1  22   19.58    6.62
  -3   1  21   29.44   11.06
  -3  -1  21   27.16    7.55
  -3   1  21   28.50    7.02
  -3   1  20   60.83   10.20
  -3   1  20   45.04   12.62
  -3  -1  20   41.43    8.74
  -3   1  19   52.77   10.52
  -3   1  19   72.35   12.27
  -3  -1  19   57.00    8.69
  -3  -1  18    6.91    7.92
  -3   1  18   25.28    6.30
  -3   1  18   24.07    5.71
   3  -1 -17    9.58    3.70
  -3   1  17    4.95    5.34
  -3  -1  17   18.94    5.43
  -3   1  17   13.21    4.75
  -3  -1  17   14.15    4.98
   3  -1 -16   12.14    3.61
  -3   1  16   14.25    5.96
  -3  -1  16   16.12    4.90
  -3   1  16   20.56    5.12
  -3  -1  16   -1.58    7.20
   3   1 -15    9.36    3.58
   3  -1 -15   11.29    4.47
  -3  -1  15   24.89    5.34
  -3   1  15   14.09    6.82
  -3   1  15   20.52    4.38
   3   1 -14   38.69    4.80
   3  -1 -14   22.73    4.17
  -3   1  14   47.75    8.17
  -3  -1  14   33.04    6.04
  -3   1  14   33.38    5.53
   3  -1 -13   28.33    4.17
   3   1 -13   28.96    4.31
  -3   1  13   27.23    5.05
  -3   1  13   28.88    5.61
  -3  -1  13   39.98    5.78
   3  -1 -12  129.89   10.41
   3   1 -12  104.65    8.57
  -3   1  12  123.64    9.63
  -3   1  12  136.12   10.60
  -3  -1  12  109.48   11.02
   3   1 -11   72.08    7.52
   3  -1 -11   56.91    5.36
  -3  -1  11   67.18    7.37
  -3   1  11   65.52    7.41
  -3   1  11   63.46    6.56
   3  -1 -10  169.02   11.63
   3   1 -10  168.31   12.44
  -3   1  10  191.30   12.98
  -3  -1  10  188.74   14.53
  -3  -1  10  170.67   15.12
  -3   1  10  169.22   17.35
   3   1  -9  204.42   17.36
   3  -1  -9  205.29   15.06
  -3  -1   9  211.94   16.44
  -3   1   9  231.97   15.65
  -3  -1   9  209.81   17.55
  -3   1   9  226.08   17.24
   3  -1  -8  372.96   30.85
   3  -1  -8  382.36   27.01
   3   1  -8  387.77   30.27
  -3  -1   8  377.03   28.46
  -3   1   8  374.77   29.19
  -3  -1   8  358.44   29.28
  -3   1   8  377.73   27.90
   3  -1  -7  302.93   20.07
   3   1  -7  302.53   24.49
   3   1  -7  301.37   20.75
   3  -1  -7  322.26   22.89
  -3   1   7  299.23   22.56
  -3   1   7  310.31   21.66
  -3  -1   7  243.81   21.19
  -3  -1   7  325.65   26.13
   3  -1  -6  121.13    8.18
   3   1  -6  116.67   10.15
   3   1  -6   85.34    8.52
   3   1  -6  103.73    8.06
   3  -1  -6  121.64   11.78
  -3  -1   6  101.10   10.34
  -3   1   6  127.15    9.96
  -3   1   6  123.30    8.81
  -3  -1   6  115.33    8.96
   3   1  -5  110.97   10.13
   3  -1  -5  103.80    7.04
   3   1  -5  108.88    7.54
   3  -1  -5  105.42    8.61
   3  -1  -5  114.28    9.21
   3   1  -5  112.77   11.36
  -3   1   5  112.79    9.51
  -3  -1   5  108.90   10.99
  -3  -1   5  106.77    8.70
  -3  -1   5   97.76    9.68
  -3   1   5  110.64    7.76
   3  -1  -4   25.54    4.32
   3  -1  -4   25.40    2.98
   3   1  -4   17.62    4.65
   3  -1  -4   23.10    3.63
   3   1  -4   25.00    3.59
   3   1  -4   13.87    4.21
  -3  -1   4   24.08    5.06
  -3  -1   4   25.85    4.43
  -3   1   4   16.14    3.44
  -3   1   4   21.38    3.36
  -3  -1   4   25.65    4.16
  -3   1   4   22.07    4.52
   3  -1  -3  117.11    6.63
   3  -1  -3  120.26    8.53
   3  -1  -3  110.06    7.13
   3   1  -3  100.53    7.44
   3   1  -3  103.84    8.23
   3   1  -3   95.90    8.09
  -3   1   3   84.95    7.30
  -3  -1   3  114.73    9.05
  -3  -1   3  102.34    8.61
  -3   1   3  106.00    8.82
  -3  -1   3  106.76    8.32
  -3   1   3   92.11    6.74
   3  -1  -2  146.73    8.91
   3   1  -2  145.92   10.31
   3   1  -2  157.63   12.69
   3   1  -2  138.15   10.34
   3  -1  -2  157.75   10.31
   3  -1  -2  157.56    9.76
  -3   1   2  148.10   10.52
  -3  -1   2  144.37   13.97
  -3  -1   2  148.79   10.28
  -3   1   2  153.33   11.12
  -3   1   2  145.56    8.92
  -3  -1   2  157.18   10.85
   3  -1  -1  152.88    9.47
   3  -1  -1  153.22   10.58
   3   1  -1  147.09   10.91
   3   1  -1  148.70   10.79
   3  -1  -1  142.53    8.00
   3   1  -1  143.89    9.89
  -3   1   1  146.07   13.37
  -3  -1   1  161.03   12.47
  -3   1   1  143.94   11.86
  -3  -1   1  156.73   10.38
  -3  -1   1  153.34   10.41
  -3   1   1  148.18    9.43
   3   1   0  100.94    8.37
   3  -1   0  117.37    9.81
   3   1   0   95.53    8.26
   3  -1   0  114.65    6.63
   3   1   0   94.64    9.01
   3  -1   0  123.39   10.34
  -3  -1   0  108.73    7.76
  -3   1   0   96.13   11.58
  -3   1   0   97.91    8.52
  -3   1   0   91.53    5.87
  -3  -1   0  113.12   11.21
  -3  -1   0  124.30    8.43
   3   1   1   20.80    3.34
   3  -1   1   23.39    3.31
   3  -1   1   26.67    4.18
   3   1   1   26.73    4.46
   3   1   1   17.95    5.50
   3  -1   1   21.16    6.65
  -3   1  -1   20.28    4.07
  -3  -1  -1   24.04    4.06
  -3  -1  -1   36.14    7.15
  -3   1  -1   17.13    5.64
  -3  -1  -1   23.86    3.63
   3  -1   2   99.61   10.86
   3  -1   2  119.53    9.58
   3   1   2  110.65    9.65
   3  -1   2   99.48    7.71
   3   1   2  112.92   11.30
   3   1   2  111.60    8.72
  -3  -1  -2  108.21   10.00
  -3   1  -2  113.35    7.54
  -3  -1  -2  125.62   14.63
  -3   1  -2  115.39   12.40
  -3  -1  -2  121.84    9.12
   3  -1   3  106.63   12.62
   3   1   3  122.99    8.65
   3  -1   3  116.44    9.17
   3   1   3  129.60   13.08
   3   1   3  124.13    9.84
   3   1   3  125.60   10.18
  -3  -1  -3  133.60    9.92
  -3   1  -3  118.55   14.71
  -3   1  -3  125.93    8.92
  -3  -1  -3  120.77   15.67
   3   1   4  321.56   21.89
   3   1   4  317.17   24.30
   3   1   4  322.60   29.58
   3  -1   4  306.59   22.88
   3  -1   4  318.31   28.86
   3   1   4  339.06   22.24
  -3   1  -4  337.30   23.23
  -3  -1  -4  356.19   25.09
  -3  -1  -4  310.09   32.90
   3  -1   5  374.35   29.33
   3   1   5  429.86   32.37
   3  -1   5  391.52   42.31
   3   1   5  408.19   38.21
  -3  -1  -5  379.88   39.27
  -3  -1  -5  397.24   29.76
  -3   1  -5  377.54   28.21
   3  -1   6  227.77   17.11
   3   1   6  240.57   23.12
   3   1   6  245.49   18.20
   3  -1   6  205.69   21.46
  -3  -1  -6  204.36   16.07
  -3  -1  -6  164.67   23.53
  -3   1  -6  217.62   15.67
  -3  -1  -6  218.76   16.71
   3   1   7  182.59   14.40
   3  -1   7  168.53   13.67
   3  -1   7  149.48   17.51
   3   1   7  175.19   18.11
  -3  -1  -7  172.24   21.58
  -3   1  -7  167.59   12.63
  -3  -1  -7  183.67   13.53
  -3  -1  -7  136.49   11.76
   3  -1   8   54.14   10.90
   3   1   8   67.93    9.91
   3  -1   8   55.91    7.39
   3   1   8   75.23    7.97
  -3   1  -8   71.67    6.71
  -3  -1  -8   52.78    6.31
   3   1   9  112.43   14.71
   3  -1   9  129.69   11.93
   3  -1   9  134.33   15.08
   3   1   9   97.43   10.71
  -3  -1  -9  110.39    9.38
  -3   1  -9  132.92    9.92
   3  -1  10   32.75    5.83
   3   1  10   35.82    6.33
   3   1  10   31.27    8.03
   3  -1  10   29.52    8.38
  -3  -1 -10   31.34    4.41
  -3   1 -10   22.54    6.22
   3   1  11   50.75    6.89
   3   1  11   45.52    8.71
   3  -1  11   39.37    8.41
   3  -1  11   24.91    9.00
  -3   1 -11   27.02    4.93
  -3  -1 -11   35.58    4.88
   3   1  12   16.07    5.62
   3  -1  12   13.64    5.14
   3  -1  13   14.73    5.12
   3   1  13    7.31    5.27
   3   1  14   15.59    6.07
   3  -1  14   15.56    5.30
   3   1  15   21.96    6.25
   3  -1  15   20.15    6.41
   3  -1  16   47.78    9.03
   3   1  16   43.14    8.28
   3  -1  17   43.92    8.12
   3   1  17   49.92    8.24
   3   1  18   19.37    7.32
   3  -1  18   29.91   10.53
   3   1  19    8.29    9.20
   3  -1  19   22.85    7.44
   3  -1  20   11.37    6.54
   3   1  20    3.39    6.25
   3   1  21    1.62    6.37
   3  -1  21    6.14    7.23
   3   1  22    9.85   10.14
   3  -1  22    9.24    7.78
   3  -1  23    9.85    8.61
   3   1  23   15.68    8.31
   3  -1  24    2.74    8.05
   3   1  24    3.31    7.29
   3  -1  25    3.70    8.38
   3   1  25    5.12    8.25
   3   1  26   10.29   11.33
   3  -1  26    0.84    8.42
   3   1  27   10.91    9.60
   3  -1  27    5.88    9.69
   3   1  28   -4.97    9.66
   3  -1  28  -17.25   10.13
   3   1  29   -5.60    8.84
   3  -1  29   11.81    8.64
   3   1  30   -5.40    8.89
   3  -1  30    1.34    9.34
   3   1  31   -2.24    9.37
   3  -1  31    5.46    9.44
   3   1  32   11.36    9.56
   3  -1  32  -19.62   10.17
   3  -1  33   11.92   12.14
   3   1  33   12.26   14.39
  -3   2  36   12.85   11.19
  -3  -2  36    1.86   12.13
  -3   2  36    9.96   15.43
  -3  -2  36   -5.44   19.67
  -3   2  36   24.26   15.29
  -3  -2  35    5.00   11.47
  -3   2  35   25.04   11.34
  -3   2  35  -22.75   21.15
  -3  -2  35   15.80   15.35
  -3   2  35    3.82   13.80
  -3   2  34   -8.08    9.35
  -3  -2  34    3.14   13.66
  -3  -2  34   16.96   10.25
  -3   2  34    5.46   16.13
  -3   2  33   11.02   16.50
  -3  -2  33    6.30    9.77
  -3   2  33    2.27    8.90
  -3  -2  32   17.01   10.58
  -3   2  32   17.50   21.70
  -3   2  32    0.78   12.96
  -3   2  31   21.62   15.81
  -3  -2  31    8.48   10.55
  -3   2  31   16.91    9.49
  -3   2  30   39.91   20.90
  -3  -2  30   18.29   11.68
  -3   2  30   33.47   10.27
  -3   2  29    0.20   10.90
  -3  -2  29   14.72    9.50
  -3   2  29   24.38   13.00
  -3  -2  28   22.10    9.14
  -3   2  28   -1.00   11.23
  -3   2  28    6.39    7.76
  -3   2  27   35.08   14.47
  -3   2  27    7.82    7.26
  -3  -2  27   11.19    8.70
  -3   2  26   22.50    9.53
  -3  -2  26   15.35    9.04
  -3   2  26   12.87   10.29
  -3  -2  25    6.95    7.73
  -3   2  25    9.20    8.04
  -3   2  25    7.90    6.89
  -3   2  24   10.14   11.20
  -3   2  24   15.35    9.40
  -3  -2  24   22.39    8.46
  -3  -2  23    0.16    5.97
  -3   2  23    1.74    5.31
  -3   2  23   -2.35    7.70
  -3  -2  22   -6.59    6.06
  -3   2  22    3.49    7.74
  -3   2  22    9.54    6.55
  -3   2  21   19.82    6.60
  -3   2  21   17.62    8.65
  -3  -2  21   19.18    7.25
  -3  -2  20   29.54    7.27
  -3   2  20   22.09    6.50
  -3   2  20   27.66    7.02
  -3  -2  19   10.02    6.03
  -3   2  19   16.00    6.88
  -3   2  19    7.85    5.43
  -3  -2  18   94.85   11.66
  -3   2  18  109.57   10.92
  -3   2  18  109.98   14.04
   3  -2 -17   21.54    4.12
  -3  -2  17   29.74    6.47
  -3   2  17   24.87    5.77
  -3   2  17   19.45    5.32
   3  -2 -16    0.70    2.92
  -3  -2  16    5.23    4.72
  -3   2  16    4.99    4.18
  -3   2  16   -1.02    3.92
   3  -2 -15  188.97   16.42
   3   2 -15  167.43   14.12
  -3   2  15  221.33   16.55
  -3   2  15  189.04   16.48
  -3  -2  15  195.25   16.92
   3  -2 -14    8.40    3.27
   3   2 -14   15.13    3.84
  -3  -2  14   14.96    5.18
  -3   2  14   11.11    3.96
  -3   2  14   13.19    6.38
   3  -2 -13   44.31    4.64
   3   2 -13   35.28    6.79
  -3   2  13   54.05    7.23
  -3   2  13   49.04    6.18
  -3  -2  13   46.00    6.99
   3  -2 -12  239.10   18.34
   3   2 -12  216.37   19.11
  -3   2  12  244.13   18.95
  -3  -2  12  267.01   20.04
  -3   2  12  253.94   17.78
   3  -2 -11    8.78    3.59
   3   2 -11   19.32    3.69
  -3  -2  11   12.84    4.80
  -3   2  11    8.30    4.26
  -3   2  11   11.27    3.34
   3   2 -10   42.44    5.40
   3  -2 -10   42.36    5.14
  -3  -2  10   38.83    6.72
  -3   2  10   38.47    5.67
  -3   2  10   49.70    5.92
   3  -2  -9  316.87   25.14
   3  -2  -9  313.40   22.01
   3   2  -9  306.37   23.11
  -3  -2   9  308.35   24.15
  -3   2   9  315.60   22.54
  -3   2   9  311.22   25.83
   3  -2  -8   68.62    6.11
   3   2  -8   68.46    8.55
   3   2  -8   50.06    6.09
   3  -2  -8   59.42    5.33
  -3  -2   8   57.94    7.15
  -3   2   8   58.47    8.94
  -3   2   8   67.10    6.22
   3   2  -7   62.66    6.10
   3   2  -7   60.44    8.47
   3  -2  -7   58.55    7.65
   3  -2  -7   63.12    4.92
  -3   2   7   63.21    5.30
  -3   2   7   65.90    6.90
  -3  -2   7   60.41    7.98
  -3  -2   7   70.65    7.10
   3  -2  -6   55.79    4.20
   3   2  -6   50.98    5.70
   3   2  -6   66.89    8.30
   3  -2  -6   61.39    7.27
  -3  -2   6   61.26    7.47
  -3  -2   6   54.05    6.98
  -3   2   6   61.91    6.63
  -3   2   6   57.14    4.56
   3  -2  -5   79.93    5.51
   3  -2  -5   82.55    6.94
   3  -2  -5   82.36    5.27
   3   2  -5   93.12    7.16
   3   2  -5   77.85    9.34
  -3   2   5   80.94    5.52
  -3   2   5   88.23   10.13
  -3  -2   5   78.92    8.36
  -3  -2   5   83.62    8.23
  -3  -2   5   84.87    8.30
   3   2  -4   32.17    4.30
   3   2  -4   29.02    6.14
   3  -2  -4   28.28    2.27
   3   2  -4   31.39    4.53
   3  -2  -4   35.83    4.41
  -3   2   4   41.84    5.21
  -3  -2   4   34.99    5.06
  -3   2   4   30.39    2.72
  -3  -2   4   28.06    5.16
  -3  -2   4   33.66    5.55
   3   2  -3  175.35   12.05
   3  -2  -3  185.64   12.57
   3   2  -3  174.08   12.23
   3   2  -3  187.35   14.35
  -3  -2   3  221.71   15.51
  -3  -2   3  140.29   11.98
  -3  -2   3  183.04   13.18
  -3   2   3  174.56    9.30
  -3   2   3  166.88   15.10
   3  -2  -2  107.02   10.12
   3   2  -2  111.15    8.61
   3   2  -2  115.78    8.21
   3   2  -2  118.14   10.13
  -3  -2   2  100.41    9.65
  -3   2   2  113.71    7.99
  -3   2   2  111.88   10.74
  -3  -2   2  101.15    8.27
  -3  -2   2  100.61   10.13
   3   2  -1  104.58    9.49
   3   2  -1  124.42    9.38
   3  -2  -1   90.75    7.54
   3  -2  -1  106.40    6.70
   3   2  -1  115.40    7.82
   3  -2  -1   91.01    8.42
  -3   2   1  105.98    8.82
  -3  -2   1  103.08   10.36
  -3   2   1   71.56   10.28
  -3   2   1  100.53    5.65
  -3  -2   1  106.94    8.62
  -3  -2   1  101.12    7.54
   3  -2   0  187.60   14.22
   3   2   0  173.17   13.75
   3   2   0  181.85   11.18
   3  -2   0  182.04   12.54
   3  -2   0  181.26   10.84
   3   2   0  168.16   13.40
  -3  -2   0  191.58   17.16
  -3  -2   0  169.88   10.60
  -3   2   0  197.83   14.83
  -3  -2   0  171.76   12.79
  -3   2   0  172.78   10.33
  -3   2   0  182.00   15.49
   3   2   1   33.66    5.58
   3   2   1   31.71    3.41
   3   2   1   32.11    6.22
   3  -2   1   28.10    5.20
   3  -2   1   34.72    4.54
   3  -2   1   41.31    5.05
  -3  -2  -1   20.05    7.49
  -3  -2  -1   28.00    3.61
  -3   2  -1   28.61    3.07
  -3  -2  -1   39.00    5.14
   3   2   2   84.74    6.87
   3  -2   2   87.64    6.58
   3   2   2   98.99   10.18
   3  -2   2  100.01    9.48
   3   2   2   73.21    8.42
  -3  -2  -2   79.75    7.48
  -3  -2  -2   83.07    7.41
  -3   2  -2   87.15    6.04
  -3  -2  -2   86.78   12.39
   3  -2   3   56.72    5.60
   3  -2   3   49.79    8.12
   3   2   3   60.44    7.27
   3   2   3   59.08    5.35
   3   2   3   49.58    8.60
  -3  -2  -3   62.19    6.42
  -3   2  -3   56.51    5.09
  -3  -2  -3   54.92   10.71
   3   2   4   62.19    6.77
   3   2   4   55.04    5.38
   3   2   4   59.14    9.40
   3   2   4   48.80    9.16
   3  -2   4   60.39   12.19
   3  -2   4   69.40    8.25
  -3  -2  -4   63.21    6.54
  -3  -2  -4   66.83   15.72
[truncated: 1,754,968 more chars]
